# Supplementary material
Source: PubMed Central journal article supplement (PMC4194113)

| Motif    |           | Raw score | P value | Species        |
|----------|-----------|-----------|---------|----------------|
| MA0383.1 | SMP1      | 32.9      | 0       | S.Cerevisiae   |
| MA0107.1 | RELA      | 27.7      | 0       | H.Sapiens      |
| MA0317.1 | HCM1      | 26        | 0       | S.Cerevisiae   |
| MA0084.1 | SRY       | 24.6      | 0       | H.Sapiens      |
| MA0127.1 | PEND      | 19.8      | 0       | P.Sativum      |
| MA0165.1 | Abd-B     | 19.4      | 0       | D.Melanogaster |
| MA0101.1 | REL       | 19        | 0       | H.Sapiens      |
| MA0237.1 | pan       | 17.8      | 0       | D.Melanogaster |
| MA0356.1 | PHO2      | 17.2      | 0       | S.Cerevisiae   |
| MA0061.1 | NF-kappaB | 16.8      | 0       | H.Sapiens      |
| MA0013.1 | br_Z4     | 38.2      | 0.001   | D.Melanogaster |
| MA0346.1 | NHP6B     | 70.5      | 0.002   | S.Cerevisiae   |
| MA0345.1 | NHP6A     | 49        | 0.002   | S.Cerevisiae   |
| MA0068.1 | Pax4      | 55.5      | 0.003   | M.Musculus     |
| MA0080.2 | SPI1      | 27.5      | 0.003   | H.Sapiens      |
| MA0012.1 | br_Z3     | 24        | 0.003   | D.Melanogaster |
| MA0458.1 | slp1      | 19.6      | 0.003   | D.Melanogaster |
| MA0156.1 | FEV       | 19.5      | 0.003   | H.Sapiens      |
| MA0136.1 | ELF5      | 18.6      | 0.009   | M.Musculus     |

**SMP1**

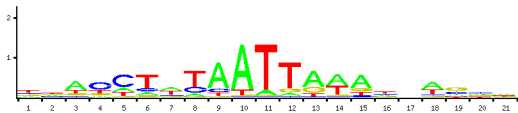

**RELA**

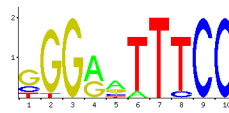

**HCM1**

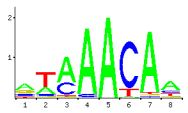

**SRY**

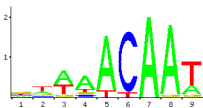

**PEND**

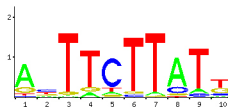

**Abd-B**

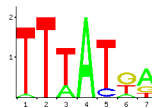

**REL**

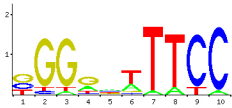

**pan**

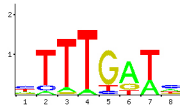

**PHO2**

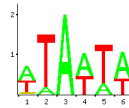

**NF-kappaB**

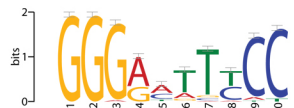

Supplement: embj0033-0890-sd14.pdf [file embj0033-0890-sd14.pdf]
