# Supplementary material
Source: PubMed Central journal article supplement (PMC4194113)
Supplement: embj0033-0890-sd5.pdf [file embj0033-0890-sd5.pdf]

Supplementary Figure 5

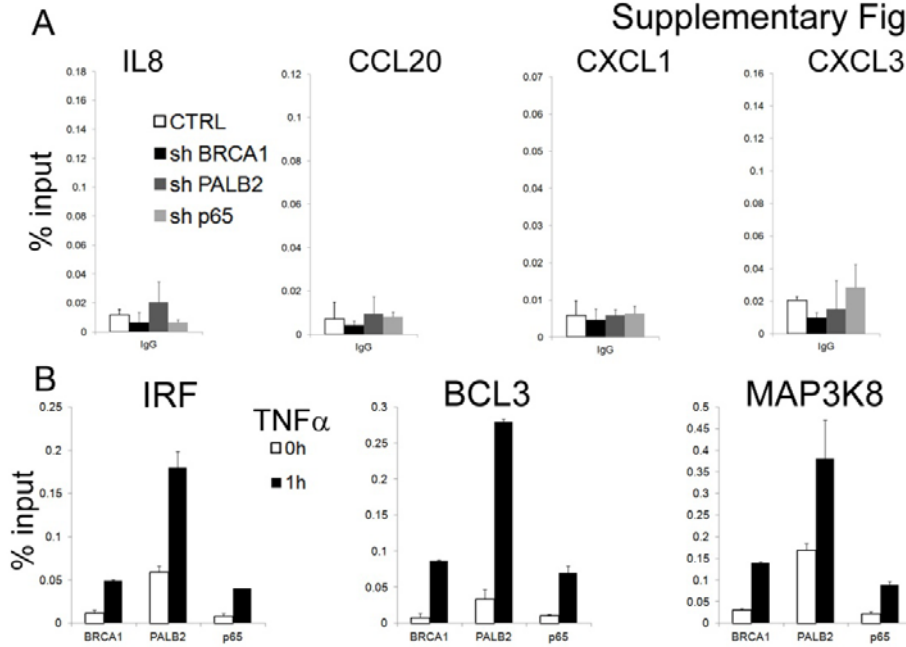

Supplementary Figure 5

(A) Enrichment levels of IgG controls (shown as percent of input) relative to the ChIP analysis presented in Figure 6C.

(B) Recruitment of BRCA1 and PALB2 also occurs at NF- $\kappa$ B responsive genes that are not affected by BRCA1 or PALB2 depletion in MCF7 cells (i.e. IRF, BCL3 and MAP3K8 are responsive to TNF $\alpha$  and dependent on p65 but not BRCA1 and PALB2 for their activation, cf. Supplementary Table S4).
