# Supplementary material
Source: PubMed Central journal article supplement (PMC4194113)
Supplement: embj0033-0890-sd6.pdf [file embj0033-0890-sd6.pdf]

## Supplementary Figure 6

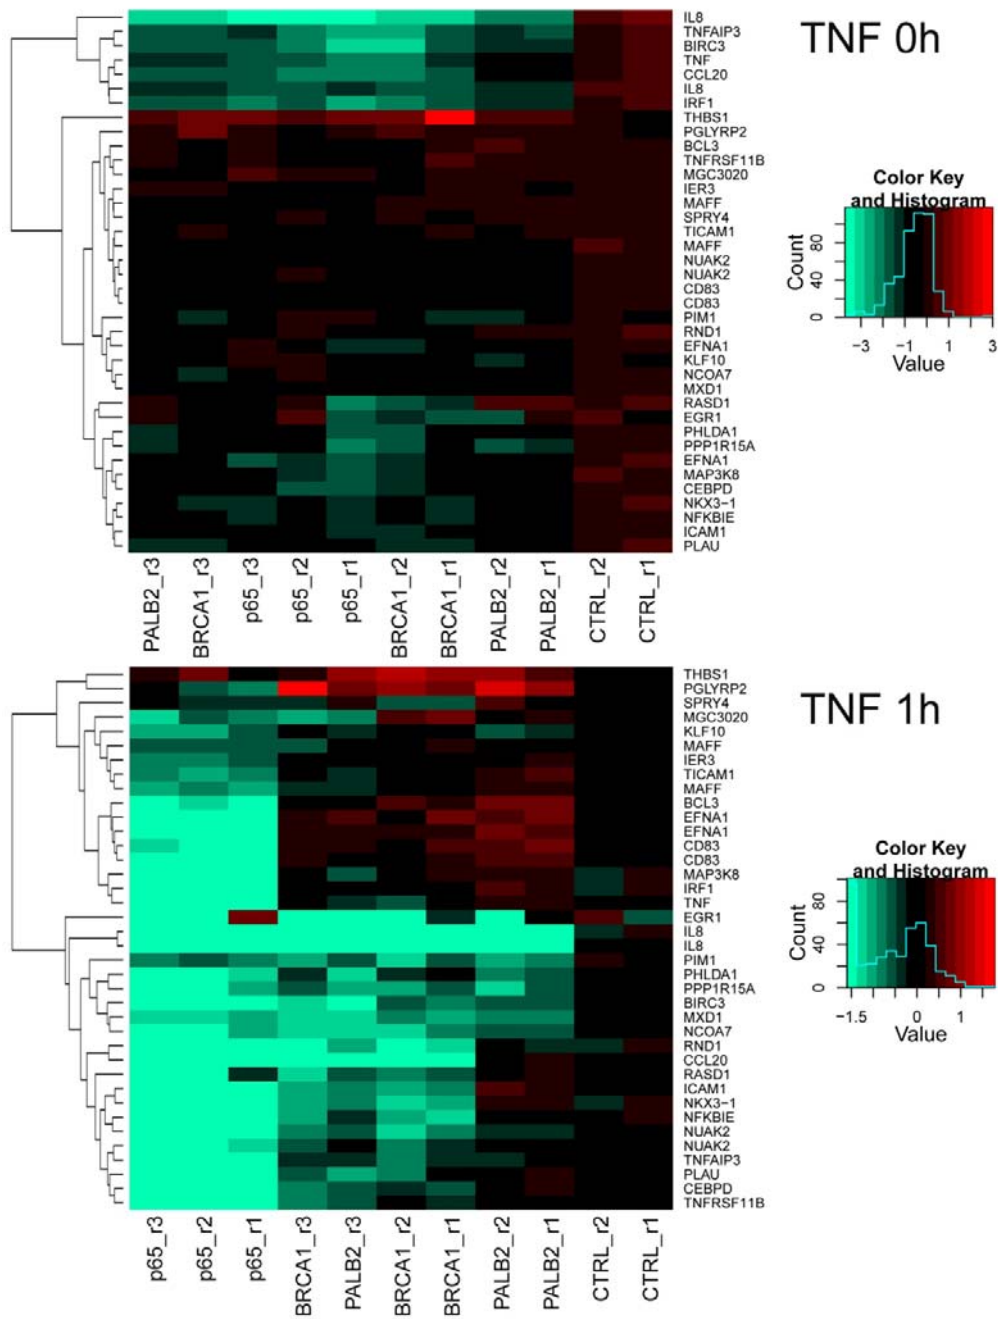

Supplementary Figure 6

Clustering and heatmap analysis of 33 TNFalpha responsive genes before (TNF 0h) and after induction (TNF 1h). Data plotted are log2 fluorescence values, quantile normalized.
