# Supplementary material
Source: PubMed Central journal article supplement (PMC4194113)
Supplement: embj0033-0890-sd7.pdf [file embj0033-0890-sd7.pdf]

## Supplementary Figure 7

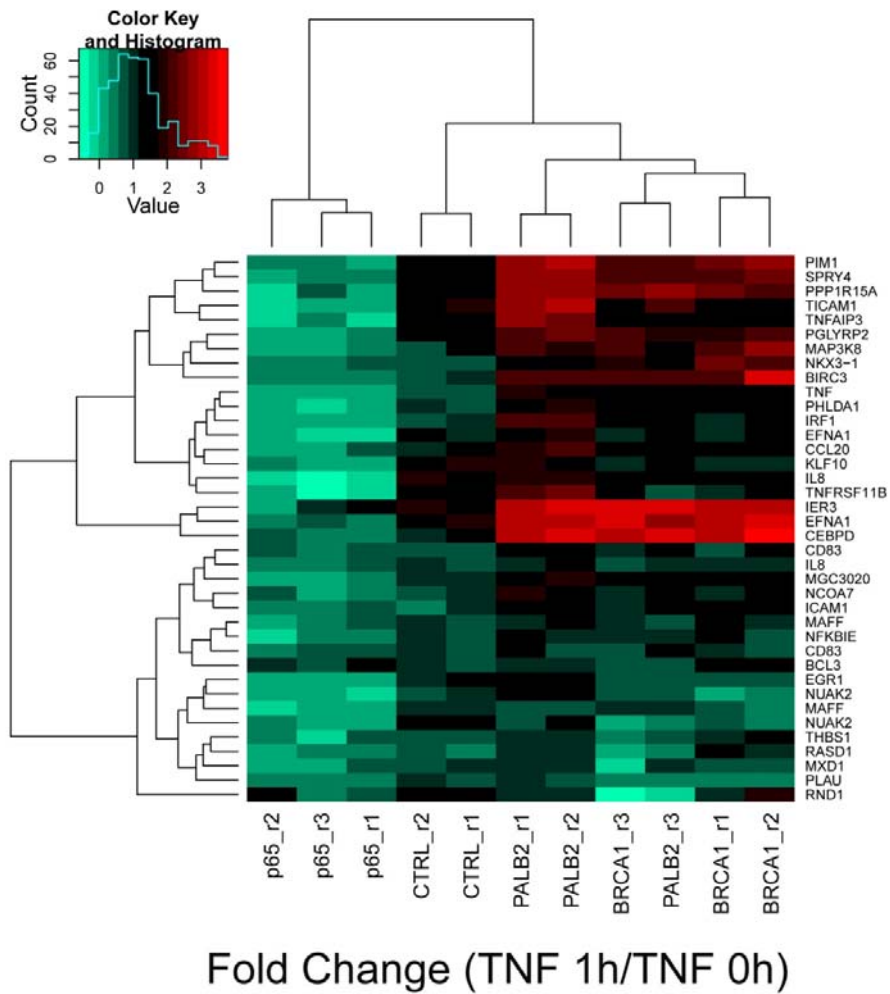

Supplementary Figure 7

Clustering and heatmap analysis of 33 TNF $\alpha$  responsive genes. Log<sub>2</sub> of fold change (TNF1h/TNF0h) are plotted.
