# Supplementary material
Source: PubMed Central journal article supplement (PMC4194113)
Supplement: embj0033-0890-sd8.pdf [file embj0033-0890-sd8.pdf]

## Supplementary Figure 8

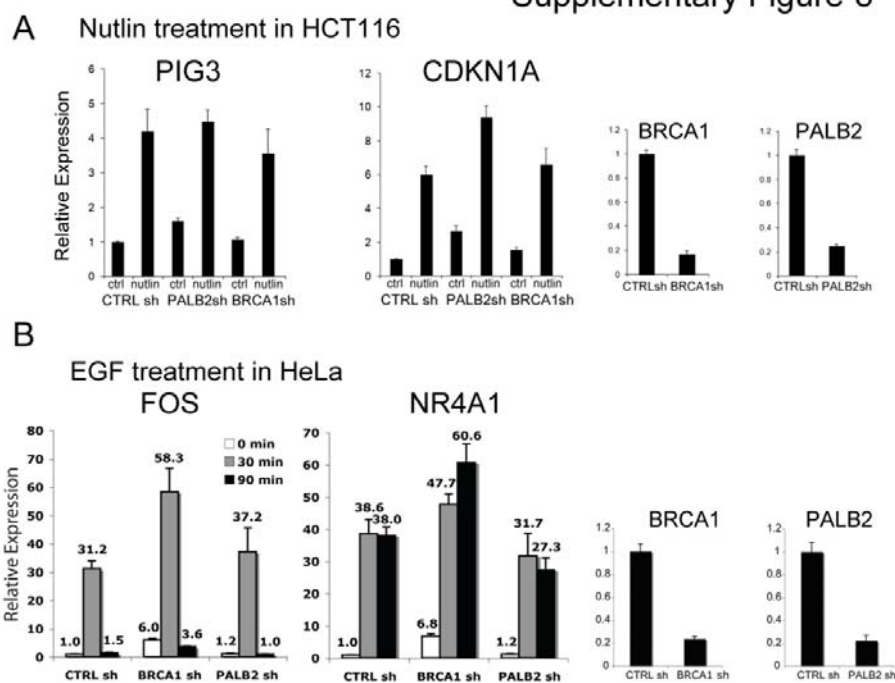

### Supplementary Figure 8

(A) Analysis of Nutlin-3 response in HCT116 cells. HCT116 cells were transfected with PALB2, BRCA1 and non targeting (SCR) shRNAs. After selection, cells were stimulated with Nutlin-3 for 16 hours to trigger p53 activation. *PIG3* and *CDKN1A* expression is induced by Nutlin treatment, however their response does not significantly change upon depletion of the breast cancer proteins. Results are the average of three independent experiments, data are expressed as fold change over uninduced SCR sh and normalized using *GUSB* expression.

(B) Analysis of EGF response in HeLa cells. HeLa cells were transfected with PALB2, BRCA1 and non targeting (SCR) shRNAs. After selection, cells were starved in 0.5% serum for 24h and stimulated with rEGF (100ng/ml) for 30 and 90 minutes. Expression of Immediate Early Genes like *FOS* and *NR4A1* is greatly induced by EGF treatment, however their response does not significantly change upon depletion of the breast cancer proteins. Results are the average of three independent

experiments, data are expressed as fold change over uninduced SCR sh and normalized using *GUSB* expression.
