# Supplementary material
Source: PubMed Central journal article supplement (PMC4194113)
Supplement: embj0033-0890-sd9.pdf [file embj0033-0890-sd9.pdf]

## Supplementary Figure 9

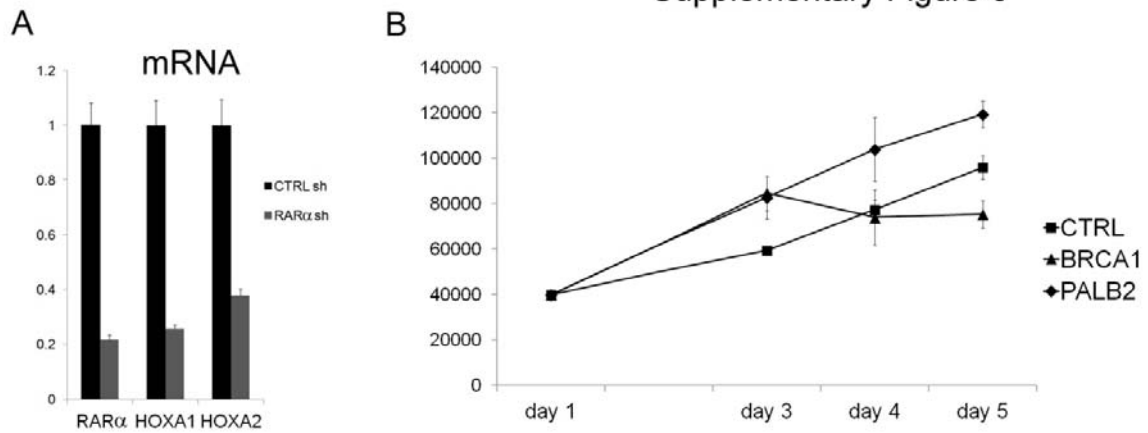

### Supplementary Figure 9

(A) Expression levels of *RARA*, *HOXA1* and *HOXA2* genes upon depletion of *RAR $\alpha$* .

This control experiment is relative to Figure 8D.

(B) Growth curve of MCF7 cells transfected with shRNAs against BRCA1, PALB2 and a non targeting control.
