# Supplementary material
Source: PubMed Central journal article supplement (PMC4194113)
Supplement: embj0033-0890-sd10.pdf [file embj0033-0890-sd10.pdf]

## Supplementary Methods

### Promoter Analysis of BRCA1/PALB2 target genes

Promoter analysis was performed using CLOVER (Martin C Frith, Yutao Fu, Liqun Yu, Jiang-Fan Chen, Ulla Hansen, Zhiping Weng (2004). Detection of functional DNA motifs via statistical over-representation. *Nucleic Acids Research* 32(4):1372-81).

For each gene, the promoter region (1000bp upstream and 500bp downstream of TSS) was analyzed using the Jaspar 2009 TF matrix database. As a background we used the promoter region of all Hg18 genes. We reported matrices significantly over-represented, with a p-value below 0.01.

### Oligonucleotides for qChIP

|               |                          |
|---------------|--------------------------|
| FOS 5' FOR    | CCAAGACTGAGCCGGCGGCC     |
| FOS 5' REV    | ACAGGTGGGCGCTGTGGAGC     |
| FOS body FOR  | GGGGTGCCAGGAAGCAGGGA     |
| FOS body REV  | ACCTCCATTACCCACCCCAGT    |
| FOS 3' FOR    | ATGCGACCAACCTTGTGCTCT    |
| FOS 3' REV    | GTCCCCCTCCAGCAGCTACC     |
| NEAT1 FOR     | GGGACCACAGTGGGGCAGGC     |
| NEAT1 REV     | CCTGGCCTGGAGCGTGGCTG     |
| FTH FOR       | CCCACCCAGCTTCCCTTGC      |
| FTH REV       | AGCCAGTGCTGGGCGTAGGT     |
| U4 FOR        | TCAAGTCGTCATGGCGGGGT     |
| U4 REV        | TCCAGCTTTGCGCAGTGGCA     |
| U11 FOR       | TGCCACCCTGCTTTGGTGACA    |
| U11 REV       | GCCCTACGTGTGCCACTCACG    |
| MALAT1 FOR    | CACTTCAACCCCTATGTTGC     |
| MALAT1 REV    | ATACAGGCTGGGTAGGTTGG     |
| U1 0 FOR      | TCCGGAGTGCAATGGATAAG     |
| U1 0 REV      | GAGGCGTATGAGGCTGTGTC     |
| U1 +0.3kb FOR | GAGAAAAAGCGAGCATCAGC     |
| U1 +0.3kb REV | ACCAATCCCTGCAAAAAGC      |
| U1 +0.6kb FOR | TCACTCCACATCCTACATCC     |
| U1 +0.6kb REV | GACACTGGCACCAGAAATAGG    |
| U1 +2kb FOR   | CAGCTGAAAAATTCAAATACATGC |
| U1 +2kb REV   | TCATATTGCTGATTCCATTGC    |
| JUN FOR       | TGTGGCTGAAGCAGCGAGGC     |
| JUN REV       | GACCTGGCTGGCTGGCTGTG     |
| CXCL1 5' FOR  | TCGGAGAGCCACAGAGCCCG     |
| CXCL1 5' REV  | GAGGAGCGGAAGAGCTGGCG     |
| CXCL1 3' FOR  | AGGCAGTCTCCTGTTGGGAGTGT  |
| CXCL1 3' REV  | TCACCCTGTGACTACCACGCCA   |
| IL8 5' FOR    | AGTGTGATGACTCAGGTTTGCCCT |
| IL8 5' REV    | CCACGATTTGCAACTGATGGCCC  |

|               |                           |
|---------------|---------------------------|
| IL8 3' FOR    | GTCCTTGTTCCACTGTGCCTTGGT  |
| IL8 3' REV    | AGTGCTTCCACATGTCTCACAACA  |
| NFKBIA 5' FOR | ACGGACTGCTGTGGGCTCTGC     |
| NFKBIA 5' REV | CCCCAGCCAGCGTTTATAGGGCG   |
| NFKBIA 3' FOR | ACCCCAAACGAGCACGTATGAAA   |
| NFKBIA 3' REV | CCTGTCTAGGGTCACCTTGCAGGA  |
| SOD 2 3' FOR  | TGACTGGAGATACAGGTCTTGGTCT |
| SOD 2 3' REV  | TCACTGAGTTTCCATGGGAAAGGAA |
| CXCL2 3' FOR  | TCTCCCATCAGGGGCAAGACCA    |
| CXCL2 3' REV  | TGCTGTCACTCCCCTTGGCT      |
| HOXA1 FOR     | TGGGGTATTCCAGGAAGGAG      |
| HOXA1 REV     | GCAGGACCAGGTCACCTCAG      |
| HOXA1 3'FOR   | GCTCCTGGACTCGCCTTTTCGC    |
| HOXA1 3' REV  | ACAGCTCTCCCCTCCCTTGTCC    |
| HOXA2 FOR     | TCCCTGGAAATCGCCGATGGCA    |
| HOXA2 REV     | AAGCAGTTCTCAGGCGCCGCG     |
| HOXA2 3'FOR   | CCTGGAGTTGGGGGTTTCTGT     |
| HOXA2 3'REV   | GCCAAGCCCAAGCTCTTGAA      |
| CCL20 FOR     | GTGGCAACACGCCTTCTGTG      |
| CCL20 REV     | CAGCCTGGGATGGCCCTATT      |
| TNFAIP3 FOR   | GTGGAAATCCCCGGGCCTAC      |
| TNFAIP3 REV   | CAGTCTGCTTTGCCCGTTT       |
| CXCL3 FOR     | ATCCCGGAGCTCCAGATCG       |
| CXCL3 REV     | CTCCCCCTACCCGTATCCGA      |
| IRF FOR       | ACTTAGCGGGATTCCCCAGC      |
| IRF REV       | TTTCCCCGAAATGACGGCAC      |
| MAP3K8 FOR    | GAAAACTCGTCCCCGTCCCA      |
| MAP3K8 REV    | CGGGACTAGGGAGGAGCAGA      |
| BCL3 FOR      | CGGCCGACAAAAGTCCCTTC      |
| BCL3 REV      | TGCACGGGAGGGTGGTTTC       |

### Oligonucleotides for RT-PCR

|            |                             |
|------------|-----------------------------|
| IL8 FOR    | CGTGGCTCTCTTGGCAGCCT        |
| IL8 REV    | AGCACTCCTTGGCAAACTGCAC      |
| CXCL1 FOR  | GGCACTGCTGCTCCTGCTCC        |
| CXCL1 REV  | CCACGGACGCTCCTGCTGC         |
| CXCL2 FOR  | CATGGCCCCGCGCCACGCTCT       |
| CXCL2 REV  | AGGGGCGCTCCTGCTGCG          |
| CXCL3 FOR  | CCGCATCCCCCATGGTTCAGA       |
| CXCL3 REV  | TGCAGGAAGTGTC AATGATACGCTG  |
| NFKBIZ FOR | TGGAGTCCCGGTCGAGAGGGC       |
| NFKBIZ REV | CTCTCTGCTGCCTGCCAACC        |
| NFKBIA FOR | ACTGAACTGATAAGACCCTTCAAGCCT |
| NFKBIA REV | ACGTGCTCGTTTTGGGGTAAACA     |
| SOD2 FOR   | GGGCATCGAGACTACTGGGTGCA     |
| SOD2 REV   | TGTGAAAAGGAAGGAGCACGAATGCT  |
| P65 FOR    | CCGCCTGCCGCCTGTCCTT         |
| P65 REV    | GCTCGGCAGTGTTGGGGGCA        |
| PALB2 FOR  | CCTCCCGGGAAGCCCCTCAG        |
| PALB2 REV  | CGCTGAAGGCGGGCTAGTGT        |
| BRCA1 FOR  | GCGCTCAGGAGGCCTTCACCC       |
| BRCA1 REV  | GTA CT TCTTCAACGCGAAGAGCAGA |

|             |                           |
|-------------|---------------------------|
| HOXA1 FOR   | CCCTCCCAAAACAGGGAAAG      |
| HOXA1 REV   | CTGCTTGGTAGTGAAGTTGG      |
| HOXA2 FOR   | TCCCTGGAAATCGCCGATGGCA    |
| HOXA2 REV   | AAGCAGTTCTCAGGCGCCGCG     |
| PIG3 FOR    | GGCTCACCGCCTTCCAGCTG      |
| PIG3 REV    | GCAGCTGTGCCACACCACT       |
| CDKN1A FOR  | GAATAGGGCTTCCCTCTGG       |
| CDKN1A REV  | GGATAGGGCTTCCCTCTGG       |
| GUSB FOS    | CTCATTGGGAATTTTGCCGATT    |
| GUSB REV    | CCGAGTGAAGATCCCCTTTTAA    |
| ICAM1 FOR   | ACCGTGAATGTGCTCTCCCC      |
| ICAM1 REV   | AGGCCTGCAGTGCCCATTAT      |
| PHLDA1 FOR  | CGGGCAAGACAAGTTTTGAGG     |
| PHLDA1 REV  | GGGCGGAGAGACTGTTTTGC      |
| BIRC3 FOR   | CTCTGGGCAGCAGGTTTACA      |
| BIRC3 REV   | TTCTCTAGGGAGGTAGTTTTGATTT |
| NUAK2 FOR   | CAGATCAGCAACGGGGCCTA      |
| NUAK2 REV   | ATCAGGCCACAGGCATCAGA      |
| RND1 FOR    | GCGCACTCAAGAAGTGGAGG      |
| RND1 REV    | GCAGCCAATGAGCAAAACGC      |
| CCL20 FOR   | GCGGCGAATCAGAAGCAAGC      |
| CCL20 REV   | GCCGTGTGAAGCCCACAATAA     |
| TNFAIP3 FOR | TGCCTTGACCAGGACTTGGG      |
| TNFAIP3 REV | CTCTCCAACACCTCTCCGGG      |
| FOS FOR     | AGGAGGGGCAAGGTGGAACAG     |
| FOS REV     | AGCTCCCTCCTCCGTTGCG       |
| NR4A1 FOR   | ACGCGGGACCAGGGACCA        |
| NR4A1 REV   | TGGGCTTGGATACAGGGCATCT    |

### Plasmid constructs

The shRNA constructs were obtained by cloning the following oligonucleotides into the pSico PGK PURO vector:

|             |                                                               |
|-------------|---------------------------------------------------------------|
| CTRLsh-f    | TACGCCAACGCAGGAAAGAGTTCAAGAGACTCTTTCCTGCGTTGGCGTTTTTTTC       |
| CTRLsh-r    | TCGAGAAAAAACGCCAACGCAGGAAAGAGTCTCTTGAAGTCTTTCCTGCGTTGGCGTA    |
| PALB2-sh1-f | TCACTGATTCACTCAGATTGTTCAAGAGACAATCTGAGTGAATCAGTGTTTTTTC       |
| PALB2-sh1-r | TCGAGAAAAAACTGATTCACTCAGATTGTCTCTTGAACAACTGAGTGAATCAGTGA      |
| PALB2-sh2-f | TGACTTAGAAGAGGACCTTATTCAAGAGATAAGGTCCTCTTCTAAGTCTTTTTTC       |
| PALB2-sh2-r | TCGAGAAAAAAGACTTAGAAGAGGACCTTATCTCTTGAATAAGGTCCTCTTCTAAGTCA   |
| BRCA1-sh1-f | TGCAGAAACCTACAACCTATTCAAGAGAATGAGTTGTAGGTTTCTGCTTTTTTC        |
| BRCA1-sh1-r | TCGAGAAAAAAGCAGAAACCTACAACCTATTCTCTTGAATGAGTTGTAGGTTTCTGCA    |
| BRCA1-sh2-f | TGCATGAGAACAGCAGTTTATTTTCAAGAGAAATAAACTGCTGTTCTCATGCTTTTTTC   |
| BRCA1-sh2-r | TCGAGAAAAAAGCATGAGAACAGCAGTTTATTTCTCTTGAATAAACTGCTGTTCTCATGCA |
| p65-sh1-f   | TGCCCTATCCCTTACGTCATTCAAGAGATGACGTAAAGGGATAGGGCTTTTTTC        |
| p65-sh1-r   | TCGAGAAAAAAGCCCTATCCCTTACGTCATCTCTTGAATGACGTAAAGGGATAGGGCA    |
| p65-sh2-f   | TGGATTGAGGAGAAACGTAATCAAGAGATTACGTTTCTCCTCAATCCTTTTTTC        |
| p65-sh2-r   | TCGAGAAAAAAGGATTGAGGAGAAACGTAATCTCTTGAATTACGTTTCTCCTCAATCCA   |
