# Supplementary material
Source: PubMed Central journal article supplement (PMC4194113)
Supplement: embj0033-0890-sd11.pdf [file embj0033-0890-sd11.pdf]

## SUPPLEMENTARY TABLES

Supplementary Table 1 (provided as a separate pdf file)

List of BRCA1 and PALB2 target genes (RefSeq, U snRNAs and RNAPIII genes)

Supplementary Table 2 (provided as a separate pdf file)

List of BRCA1 and PALB2 regulated genes in MCF10A cells (RNA-seq analysis)

Supplementary Table 3 (provided as a separate pdf file)

List of over-represented matrices in the promoter regions of BRCA1/PALB2 target genes

Supplementary Table 4 (provided as a separate pdf file)

TNF- $\alpha$  responsive genes in MCF7 cells after 1h treatment

Supplementary Table 5 (provided as a separate pdf file)

Retinoic acid responsive genes in MCF7 cells after 24h treatment

Supplementary Table 6 (provided as a separate pdf file)

Ingenuity analysis of tumors derived from BRCA1 +/- cells.
