# Supplementary material
Source: PubMed Central journal article supplement (PMC4194113)
Supplement: embj0033-0890-sd12.pdf [file embj0033-0890-sd12.pdf]

## CLASS I GENES

(HIGHEST OCCUPANCY OF PALB2 and BRCA1 BY UNBIASED CLUSTERING)

| CHR   | REFSEQ#      | GENE SYMBOL | STRAND | LOCUS COORDINATES |          |
|-------|--------------|-------------|--------|-------------------|----------|
| chr19 | NM_016145    | C19orf56    | -      | 12639880          | 12641465 |
| chr19 | NM_004343    | CALR        | +      | 12910413          | 12916304 |
| chr19 | NM_001961    | EEF2        | -      | 3927053           | 3936461  |
| chr19 | NM_003755    | EIF3G       | -      | 10086689          | 10091599 |
| chr19 | NM_000146    | FTL         | +      | 54160377          | 54161948 |
| chr19 | NM_005354    | JUND        | -      | 18251562          | 18253432 |
| chr19 | NM_198988    | LENG9       | -      | 59664790          | 59666706 |
| chr19 | NR_036515    | LOC284454   | -      | 13806329          | 13808103 |
| chr19 | NM_023937    | MRPL34      | +      | 17277476          | 17278652 |
| chr19 | NM_002566    | P2RY11      | +      | 10083196          | 10087064 |
| chr19 | NM_014330    | PPP1R15A    | +      | 54067460          | 54071131 |
| chr19 | NM_012423    | RPL13A      | +      | 54682676          | 54687376 |
| chr19 | NR_026712    | RPL13AP5    | +      | 54682676          | 54686908 |
| chr19 | NM_000980    | RPL18A      | +      | 17831730          | 17835124 |
| chr19 | NR_001593    | RPL18AP3    | +      | 17831726          | 17835118 |
| chr19 | NM_033643    | RPL36       | +      | 5641271           | 5642678  |
| chr19 | NM_001015    | RPS11       | +      | 54691445          | 54694756 |
| chr19 | NM_001020    | RPS16       | -      | 44615686          | 44618458 |
| chr19 | NM_001031    | RPS28       | +      | 8292383           | 8293280  |
| chr19 | NM_001013    | RPS9        | +      | 59396537          | 59403327 |
| chr19 | NM_003407    | ZFP36       | +      | 44589326          | 44591885 |
| chr17 | NM_003786    | ABCC3       | +      | 46067216          | 46124062 |
| chr17 | NM_000018    | ACADVL      | +      | 7063876           | 7069309  |
| chr17 | NM_001185078 | ARHGDI3     | -      | 77418885          | 77422571 |
| chr17 | NM_000759    | CSF3        | +      | 35425139          | 35427592 |
| chr17 | NM_001893    | CSNK1D      | -      | 77793825          | 77824883 |
| chr17 | NM_004396    | DDX5        | -      | 59924835          | 59932946 |
| chr17 | NM_005801    | EIF1        | +      | 37098652          | 37101424 |
| chr17 | NM_001416    | EIF4A1      | +      | 7416780           | 7423048  |
| chr17 | NM_005324    | H3F3B       | -      | 71284109          | 71287455 |
| chr17 | NM_006460    | HEXIM1      | +      | 40580466          | 40585251 |
| chr17 | NM_000213    | ITGB4       | +      | 71229110          | 71265494 |
| chr17 | NM_032356    | LSMD1       | -      | 7700727           | 7701897  |
| chr17 | NM_001190452 | MTRNR2L1    | +      | 21946563          | 21948118 |
| chr17 | NM_021724    | NR1D1       | -      | 35502562          | 35510499 |
| chr17 | NM_080822    | OVCA2       | +      | 1892026           | 1893475  |
| chr17 | NM_002616    | PER1        | -      | 7984512           | 7996478  |
| chr17 | NM_000978    | RPL23       | -      | 34259846          | 34263579 |
| chr17 | NM_000984    | RPL23A      | +      | 24071126          | 24075501 |
| chr17 | NM_000988    | RPL27       | +      | 38403971          | 38408497 |
| chr17 | NM_000999    | RPL38       | +      | 69711389          | 69717614 |
| chr17 | NM_001078166 | SRSF1       | -      | 53433278          | 53439706 |
| chr17 | NM_001160407 | TLCD1       | -      | 24075492          | 24078076 |
| chr17 | NM_032865    | TNS4        | -      | 35885605          | 35911380 |

|       |              |              |   |           |           |
|-------|--------------|--------------|---|-----------|-----------|
| chr17 | NM_052857    | ZNF830       | + | 30312661  | 30314318  |
| chr22 | NM_001675    | ATF4         | + | 38246514  | 38248637  |
| chr22 | NR_027033    | LOC400931    | + | 44860540  | 44888472  |
| chr22 | NM_001014440 | ODF3B        | - | 49315703  | 49317874  |
| chr22 | NM_000967    | RPL3         | - | 38038832  | 38045616  |
| chr22 | NM_001008695 | THAP7        | - | 19684060  | 19686404  |
| chr22 | NM_001079539 | XBP1         | - | 27520547  | 27526560  |
| chr18 | NM_020412    | CHMP1B       | + | 11841388  | 11844448  |
| chr18 | NM_001105244 | PTPRM        | + | 7557313   | 8396859   |
| chr18 | NM_000985    | RPL17        | - | 45268848  | 45272933  |
| chr15 | NM_001002857 | ANXA2        | - | 58426641  | 58477477  |
| chr15 | NM_001271    | CHD2         | + | 91244554  | 91372241  |
| chr2  | NM_016441    | CRIM1        | + | 36436873  | 36631782  |
| chr15 | NM_015322    | FEM1B        | + | 66357194  | 66370694  |
| chr2  | NM_001037663 | EEF1B2       | + | 206732562 | 206735898 |
| chr2  | NM_002026    | FN1          | - | 215933423 | 216009036 |
| chr2  | NM_005253    | FOSL2        | + | 28469282  | 28491020  |
| chr2  | NM_000575    | IL1A         | - | 113247962 | 113259442 |
| chr15 | NM_000968    | RPL4         | - | 64578706  | 64584238  |
| chr15 | NM_001003    | RPLP1        | + | 67532212  | 67534938  |
| chr2  | NM_001199241 | KYNU         | + | 143351664 | 143516355 |
| chr2  | NR_027251    | LOC100129726 | + | 43307853  | 43309498  |
| chr2  | NM_018557    | LRP1B        | - | 140705465 | 142605740 |
| chr15 | NM_003246    | THBS1        | + | 37660571  | 37676960  |
| chr2  | NM_053050    | MRPL53       | - | 74552616  | 74553435  |
| chr2  | NM_001130158 | MYO1B        | + | 191818351 | 191998360 |
| chr2  | NM_005381    | NCL          | - | 232027702 | 232037449 |
| chr2  | NM_006164    | NFE2L2       | - | 177803278 | 177838105 |
| chr2  | NM_006196    | PCBP1        | + | 70168088  | 70169838  |
| chr2  | NM_001100818 | PID1         | - | 229596932 | 229844301 |
| chr2  | NM_005168    | RND3         | - | 151032954 | 151052426 |
| chr2  | NM_000998    | RPL37A       | + | 217071764 | 217074433 |
| chr2  | NM_001135592 | RPS27A       | + | 55312542  | 55316493  |
| chr2  | NM_152386    | SGPP2        | + | 222997565 | 223131861 |
| chr2  | NM_005415    | SLC20A1      | + | 113119997 | 113137871 |
| chr16 | NM_001002017 | HCFC1R1      | - | 3012626   | 3014288   |
| chr16 | NM_001010989 | HERPUD1      | + | 55523248  | 55535294  |
| chr16 | NM_175617    | MT1E         | + | 55217085  | 55218525  |
| chr2  | NM_032118    | WDR54        | + | 74502392  | 74506390  |
| chr16 | NM_005953    | MT2A         | + | 55199978  | 55200910  |
| chr2  | NM_006887    | ZFP36L2      | - | 43303044  | 43307249  |
| chr2  | NM_144631    | ZNF513       | - | 27453606  | 27457097  |
| chr16 | NM_022341    | PDF          | - | 67920024  | 67921999  |
| chr10 | NM_021732    | AVP11        | - | 99427170  | 99437005  |
| chr10 | NM_001080512 | BICC1        | + | 59942909  | 60258851  |
| chr16 | NM_002801    | PSMB10       | - | 66525907  | 66528254  |
| chr16 | NM_002811    | PSMD7        | + | 72888181  | 72897687  |

|       |              |              |   |           |           |
|-------|--------------|--------------|---|-----------|-----------|
| chr10 | NM_007021    | C10orf10     | - | 44791714  | 44794336  |
| chr16 | NM_014353    | RAB26        | + | 2138651   | 2144142   |
| chr16 | NM_000977    | RPL13        | + | 88154590  | 88157349  |
| chr16 | NM_002952    | RPS2         | - | 1952062   | 1954828   |
| chr16 | NR_003142    | SNHG9        | + | 1954997   | 1955506   |
| chr10 | NM_019058    | DDIT4        | + | 73703682  | 73705803  |
| chr10 | NM_001160124 | KLF6         | - | 3808187   | 3817473   |
| chr13 | NM_002015    | FOXO1        | - | 40027800  | 40138734  |
| chr13 | NM_005708    | GPC6         | + | 92677078  | 93858274  |
| chr13 | NM_001730    | KLF5         | + | 72531142  | 72549677  |
| chr13 | NM_000982    | RPL21        | + | 26723691  | 26728702  |
| chr13 | NR_026911    | RPL21P28     | + | 26723692  | 26728699  |
| chr13 | NM_003295    | TPT1         | - | 44809303  | 44813297  |
| chr14 | NM_207442    | C14orf181    | - | 68331216  | 68332943  |
| chr1  | NM_019032    | ADAMTSL4     | + | 148788521 | 148800036 |
| chr1  | NM_144772    | APOA1BP      | + | 154828181 | 154830715 |
| chr1  | NM_001024226 | ARF1         | + | 226336983 | 226353536 |
| chr14 | NM_005252    | FOS          | + | 74815233  | 74818690  |
| chr14 | NM_001077442 | HNRNPC       | - | 20747135  | 20807478  |
| chr1  | NM_199173    | BGLAP        | + | 154478574 | 154479747 |
| chr1  | NM_001136537 | BTBD19       | + | 45046740  | 45052388  |
| chr14 | NR_029378    | LOC100289511 | - | 69302752  | 69304183  |
| chr14 | NM_020529    | NFKBIA       | - | 34940466  | 34943711  |
| chr1  | NM_001146068 | CAPN2        | + | 221955917 | 222030343 |
| chr1  | NM_003607    | CDC42BPA     | - | 225244188 | 225572449 |
| chr14 | NR_002312    | RPPH1        | - | 19881069  | 19881410  |
| chr14 | NM_020195    | SDR39U1      | - | 23978811  | 23981847  |
| chr1  | NM_001554    | CYR61        | + | 85819031  | 85822236  |
| chr1  | NM_002036    | DARC         | + | 157440426 | 157442914 |
| chr1  | NM_000110    | DPYD         | - | 97315887  | 98159203  |
| chr1  | NM_004428    | EFNA1        | + | 153366972 | 153374010 |
| chr1  | NM_001428    | ENO1         | - | 8843645   | 8861738   |
| chr1  | NM_018948    | ERRFI1       | - | 7994365   | 8008980   |
| chr14 | NM_004926    | ZFP36L1      | - | 68324127  | 68329538  |
| chr1  | NM_198076    | FAM36A       | + | 243065261 | 243074982 |
| chr11 | NM_001165    | BIRC3        | + | 101693403 | 101713675 |
| chr1  | NR_002578    | GAS5         | - | 172099661 | 172103748 |
| chr1  | NM_001033044 | GLUL         | - | 180617461 | 180627964 |
| chr1  | NM_175065    | HIST2H2AB    | - | 148125642 | 148126090 |
| chr1  | NM_003517    | HIST2H2AC    | + | 148125148 | 148125585 |
| chr1  | NM_003528    | HIST2H2BE    | - | 148122633 | 148124856 |
| chr1  | NM_033445    | HIST3H2A     | - | 226711687 | 226712183 |
| chr1  | NM_175055    | HIST3H2BB    | + | 226712430 | 226712882 |
| chr1  | NM_004501    | HNRNPU       | - | 243080224 | 243094450 |
| chr1  | NM_016545    | IER5         | + | 179324260 | 179326602 |
| chr1  | NM_001077397 | IRF2BP2      | - | 232806637 | 232811894 |
| chr1  | NM_006147    | IRF6         | - | 208027884 | 208046102 |

|       |              |              |   |           |           |
|-------|--------------|--------------|---|-----------|-----------|
| chr1  | NM_002228    | JUN          | - | 59019050  | 59022373  |
| chr1  | NM_000228    | LAMB3        | - | 207854840 | 207892443 |
| chr1  | NM_005562    | LAMC2        | + | 181421796 | 181480885 |
| chr11 | NM_002032    | FTH1         | - | 61488332  | 61491708  |
| chr1  | NM_017526    | LEPROT       | + | 65658718  | 65674278  |
| chr1  | NM_170707    | LMNA         | + | 154351084 | 154376502 |
| chr11 | NM_002105    | H2AFX        | - | 118469794 | 118471387 |
| chr1  | NR_024485    | LOC100130093 | + | 225982862 | 225988678 |
| chr1  | NR_034040    | LOC100287902 | - | 234752991 | 234754431 |
| chr1  | NR_037605    | LOC100506046 | + | 172099008 | 172099703 |
| chr1  | NR_015434    | LOC148413    | + | 1324772   | 1327289   |
| chr1  | NM_001104548 | LOC642587    | + | 207668790 | 207672515 |
| chr1  | NM_001197320 | MCL1         | - | 148813650 | 148818838 |
| chr11 | NR_024430    | LOC399959    | - | 121465020 | 121578980 |
| chr11 | NR_036539    | LOC644656    | - | 9437678   | 9438821   |
| chr11 | NR_002819    | MALAT1       | + | 65021808  | 65030515  |
| chr11 | NM_001043229 | METTL12      | + | 62189354  | 62191499  |
| chr11 | NM_001190702 | MTRNR2L8     | - | 10486009  | 10487299  |
| chr11 | NM_001111018 | NAV2         | + | 19328846  | 20099723  |
| chr11 | NR_028272    | NEAT1        | + | 64946844  | 64950579  |
| chr1  | NR_026778    | NCRNA00201   | - | 243070562 | 243076866 |
| chr11 | NM_006169    | NNMT         | + | 113671744 | 113688448 |
| chr1  | NM_014801    | PCNXL2       | - | 231186504 | 231498082 |
| chr1  | NM_001198832 | PDE4DIP      | - | 143562780 | 143751349 |
| chr1  | NM_017761    | PNRC2        | + | 24158887  | 24162536  |
| chr1  | NM_032833    | PPP1R15B     | - | 202639114 | 202647567 |
| chr1  | NM_002796    | PSMB4        | + | 149638664 | 149641036 |
| chr1  | NM_005401    | PTPN14       | - | 212588661 | 212791647 |
| chr11 | NM_000990    | RPL27A       | + | 8660570   | 8667995   |
| chr11 | NM_001017    | RPS13        | - | 17052514  | 17055796  |
| chr11 | NM_001028    | RPS25        | - | 118391632 | 118394267 |
| chr11 | NM_001005    | RPS3         | + | 74788209  | 74794381  |
| chr1  | NM_004582    | RABGGTB      | + | 76024473  | 76033352  |
| chr1  | NM_002923    | RGS2         | + | 191044791 | 191048030 |
| chr11 | NR_003098    | SNHG1        | - | 62376035  | 62379936  |
| chr1  | NM_000975    | RPL11        | + | 23890855  | 23895502  |
| chr1  | NM_000969    | RPL5         | + | 93070181  | 93080069  |
| chr1  | NM_001030    | RPS27        | + | 152229862 | 152231255 |
| chr1  | NM_001012    | RPS8         | + | 45013832  | 45016999  |
| chr1  | NM_181885    | RXFP4        | + | 154178103 | 154179249 |
| chr1  | NM_001035    | RYR2         | + | 235272324 | 236063911 |
| chr1  | NM_014624    | S100A6       | - | 151773699 | 151775341 |
| chr1  | NR_003023    | SCARNA2      | + | 109444337 | 109444757 |
| chr11 | NM_024116    | TAF1D        | - | 93108745  | 93114351  |
| chr11 | NM_012459    | TIMM8B       | - | 111460745 | 111462732 |
| chr1  | NM_001167740 | SMYD3        | - | 243979264 | 244737267 |
| chr1  | NR_024127    | SNHG12       | - | 28777636  | 28780953  |

|       |              |              |   |           |           |
|-------|--------------|--------------|---|-----------|-----------|
| chr1  | NR_002909    | SNHG3        | + | 28705041  | 28709991  |
| chr11 | NM_003390    | WEE1         | + | 9551803   | 9567889   |
| chr11 | NM_006006    | ZBTB16       | + | 113435640 | 113626607 |
| chr11 | NM_033390    | ZC3H12C      | + | 109469296 | 109547776 |
| chr11 | NM_014205    | ZNHIT2       | - | 64640450  | 64641746  |
| chr1  | NM_152228    | TAS1R3       | + | 1256588   | 1259707   |
| chr1  | NM_001013632 | TCTEX1D4     | - | 45044172  | 45045544  |
| chr12 | NM_001731    | BTG1         | - | 91058184  | 91063804  |
| chr12 | NM_138425    | C12orf57     | + | 6923463   | 6925426   |
| chr12 | NM_175895    | C12orf61     | - | 61281797  | 61283481  |
| chr1  | NR_028393    | TSNAX-DISC1  | + | 229731021 | 230243641 |
| chr1  | NM_006472    | TXNIP        | + | 144149818 | 144153985 |
| chr1  | NM_206933    | USH2A        | - | 213862858 | 214663361 |
| chr12 | NM_001195053 | DDIT3        | - | 56196637  | 56200567  |
| chr1  | NM_025079    | ZC3H12A      | + | 37712705  | 37722565  |
| chr12 | NM_001946    | DUSP6        | - | 88265967  | 88270427  |
| chr12 | NM_001008394 | EID3         | + | 103221678 | 103223112 |
| chr1  | NM_001193328 | ZNF692       | - | 247110825 | 247119938 |
| chr7  | NM_001101    | ACTB         | - | 5533304   | 5536758   |
| chr12 | NM_175054    | HIST4H4      | - | 14814920  | 14815332  |
| chr12 | NM_003483    | HMGA2        | + | 64504506  | 64646338  |
| chr12 | NM_002136    | HNRNPA1      | + | 52960754  | 52965297  |
| chr12 | NR_002944    | HNRNPA1P10   | + | 52960799  | 52964930  |
| chr12 | NM_003299    | HSP90B1      | + | 102848318 | 102865833 |
| chr12 | NM_005556    | KRT7         | + | 50913220  | 50928976  |
| chr12 | NM_002392    | MDM2         | + | 67488237  | 67525479  |
| chr12 | NM_145792    | MGST1        | + | 16391342  | 16408611  |
| chr7  | NR_015431    | FLJ43663     | - | 130279458 | 130444102 |
| chr12 | NM_021019    | MYL6         | + | 54838311  | 54841633  |
| chr7  | NM_002192    | INHBA        | - | 41695125  | 41709231  |
| chr7  | NM_002214    | ITGB8        | + | 20337249  | 20421907  |
| chr7  | NM_002291    | LAMB1        | - | 107351481 | 107431040 |
| chr7  | NR_024586    | LOC100216545 | - | 104438224 | 104441824 |
| chr7  | NR_034120    | LOC646329    | - | 130216290 | 130248609 |
| chr12 | NM_001035267 | RPL41        | + | 54796640  | 54797883  |
| chr12 | NM_000970    | RPL6         | - | 111327376 | 111331826 |
| chr12 | NM_001002    | RPLP0        | - | 119118885 | 119123397 |
| chr12 | NM_001029    | RPS26        | + | 54721952  | 54724274  |
| chr12 | NM_018976    | SLC38A2      | - | 45038237  | 45052912  |
| chr7  | NM_005746    | NAMPT        | - | 105675967 | 105712874 |
| chr7  | NM_002612    | PKD4         | - | 95050744  | 95063861  |
| chr12 | NM_175861    | TMTC1        | - | 29545012  | 29828959  |
| chr12 | NM_005981    | TSPAN31      | + | 56425050  | 56428293  |
| chr12 | NM_021009    | UBC          | - | 123962144 | 123965540 |
| chr7  | NM_014390    | SND1         | + | 127079437 | 127519895 |
| chr21 | NM_005239    | ETS2         | + | 39099718  | 39118748  |
| chr7  | NM_001015072 | UFSP1        | - | 100324279 | 100325275 |

|       |              |              |   |           |           |
|-------|--------------|--------------|---|-----------|-----------|
| chr21 | NM_173354    | SIK1         | - | 43658826  | 43671430  |
| chr6  | NM_005104    | BRD2         | + | 33044414  | 33057260  |
| chr6  | NM_001008739 | C6orf226     | - | 42965980  | 42966532  |
| chr6  | NM_006079    | CITED2       | - | 139735089 | 139737478 |
| chr3  | NM_020307    | CCNL1        | - | 158348279 | 158361176 |
| chr6  | NM_005510    | DOM3Z        | - | 32045566  | 32048011  |
| chr3  | NM_021101    | CLDN1        | - | 191506183 | 191522929 |
| chr6  | NM_001402    | EEF1A1       | - | 74282193  | 74287476  |
| chr3  | NM_001850    | COL8A1       | + | 100840143 | 100997848 |
| chr6  | NM_001142800 | EYS          | - | 64487834  | 66473839  |
| chr6  | NM_001145775 | FKBP5        | - | 35649339  | 35804338  |
| chr6  | NM_001197115 | GCLC         | - | 53470098  | 53517886  |
| chr3  | NM_001967    | EIF4A2       | + | 187984054 | 187990379 |
| chr3  | NM_022763    | FNDC3B       | + | 173240111 | 173601186 |
| chr3  | NM_054110    | GALNTL2      | + | 16191187  | 16246257  |
| chr6  | NM_005319    | HIST1H1C     | - | 26163946  | 26164678  |
| chr6  | NM_005320    | HIST1H1D     | - | 26342418  | 26343195  |
| chr6  | NM_005321    | HIST1H1E     | + | 26264537  | 26265322  |
| chr6  | NM_003512    | HIST1H2AC    | + | 26232351  | 26232897  |
| chr6  | NM_021065    | HIST1H2AD    | - | 26306990  | 26307450  |
| chr6  | NM_021052    | HIST1H2AE    | + | 26325126  | 26325690  |
| chr6  | NM_021064    | HIST1H2AG    | + | 27208795  | 27209293  |
| chr6  | NM_080596    | HIST1H2AH    | + | 27222886  | 27223325  |
| chr6  | NM_003510    | HIST1H2AK    | - | 27913636  | 27914096  |
| chr3  | NM_014366    | GNL3         | + | 52694975  | 52703550  |
| chr6  | NM_003526    | HIST1H2BC    | - | 26231673  | 26232111  |
| chr6  | NM_003518    | HIST1H2BG    | - | 26324407  | 26324851  |
| chr6  | NM_021058    | HIST1H2BJ    | - | 27208073  | 27208554  |
| chr6  | NM_003519    | HIST1H2BL    | - | 27883235  | 27883688  |
| chr6  | NM_003530    | HIST1H3D     | - | 26304990  | 26307443  |
| chr6  | NM_003536    | HIST1H3H     | + | 27885820  | 27886293  |
| chr6  | NM_003544    | HIST1H4B     | - | 26135102  | 26135459  |
| chr6  | NM_003542    | HIST1H4C     | + | 26212154  | 26212544  |
| chr3  | NM_006026    | H1FX         | - | 130516303 | 130517810 |
| chr6  | NM_003539    | HIST1H4D     | - | 26296916  | 26297283  |
| chr6  | NM_003545    | HIST1H4E     | + | 26312851  | 26313228  |
| chr6  | NM_003543    | HIST1H4H     | - | 26393332  | 26393706  |
| chr3  | NM_005524    | HES1         | + | 195336627 | 195339090 |
| chr3  | NM_000884    | IMPDH2       | - | 49036765  | 49041879  |
| chr6  | NM_007355    | HSP90AB1     | + | 44322826  | 44329592  |
| chr6  | NR_026776    | LOC100270746 | - | 27095123  | 27096064  |
| chr3  | NR_034032    | LOC100289361 | - | 144202376 | 144202999 |
| chr3  | NM_001167672 | LPP          | + | 189354356 | 190091154 |
| chr6  | NM_001190706 | MTRNR2L9     | + | 62341966  | 62342493  |
| chr3  | NM_001005474 | NFKBIZ       | + | 103029523 | 103062559 |
| chr6  | NM_006813    | PNRC1        | + | 89847147  | 89851598  |
| chr6  | NM_002714    | PPP1R10      | - | 30676160  | 30692999  |

|       |              |              |   |           |           |
|-------|--------------|--------------|---|-----------|-----------|
| chr6  | NM_001198    | PRDM1        | + | 106640887 | 106664507 |
| chr6  | NM_003463    | PTP4A1       | + | 64339878  | 64351448  |
| chr3  | NM_002841    | PTPRG        | + | 61522282  | 62255613  |
| chr3  | NM_001003792 | RBMS3        | + | 29297806  | 30026890  |
| chr6  | NM_007104    | RPL10A       | + | 35544155  | 35546536  |
| chr6  | NM_001016    | RPS12        | + | 133177400 | 133180396 |
| chr6  | NM_022551    | RPS18        | + | 33347829  | 33352259  |
| chr3  | NM_002948    | RPL15        | + | 23933642  | 23937336  |
| chr3  | NM_001099645 | RPL22L1      | - | 172065358 | 172070739 |
| chr3  | NM_000996    | RPL35A       | + | 199161448 | 199167118 |
| chr3  | NM_002295    | RPSA         | + | 39423207  | 39429036  |
| chr6  | NR_003038    | SNHG5        | - | 86443443  | 86445170  |
| chr6  | NM_001024465 | SOD2         | - | 160020138 | 160034343 |
| chr3  | NR_002989    | SNORA81      | + | 187987157 | 187987335 |
| chr6  | NM_001042425 | TFAP2A       | - | 10504901  | 10527783  |
| chr3  | NM_001024847 | TGFBR2       | + | 30622997  | 30710637  |
| chr3  | NM_014220    | TM4SF1       | - | 150569494 | 150578258 |
| chr6  | NM_006290    | TNFAIP3      | + | 138230273 | 138246142 |
| chr6  | NR_028290    | VNN3         | - | 133085618 | 133097597 |
| chr6  | NM_004906    | WTAP         | + | 160068141 | 160097341 |
| chr20 | NM_001134758 | ARFRP1       | - | 61800438  | 61809799  |
| chr5  | NM_001024649 | CANX         | + | 179058535 | 179091245 |
| chr5  | NM_004417    | DUSP1        | - | 172127697 | 172130809 |
| chr5  | NM_003732    | EIF4EBP3     | + | 139907434 | 139909347 |
| chr20 | NM_080676    | MACROD2      | + | 13924145  | 15981841  |
| chr5  | NM_006098    | GNB2L1       | - | 180596533 | 180603512 |
| chr5  | NM_138820    | HIGD2A       | + | 175748389 | 175749357 |
| chr20 | NR_003604    | NCRNA00275   | + | 47328121  | 47339202  |
| chr5  | NM_006805    | HNRNPA0      | - | 137114971 | 137117938 |
| chr5  | NM_004499    | HNRNPAB      | + | 177564113 | 177570790 |
| chr5  | NM_004134    | HSPA9        | - | 137918469 | 137939217 |
| chr5  | NM_052971    | LEAP2        | + | 132237256 | 132238481 |
| chr20 | NR_003677    | PSIMCT-1     | + | 29598845  | 29599680  |
| chr5  | NR_036530    | LOC100289230 | + | 98292737  | 98294613  |
| chr5  | NR_037665    | LOC100506548 | - | 40861120  | 40865001  |
| chr20 | NM_004902    | RBM39        | - | 33754944  | 33793607  |
| chr20 | NM_080748    | ROMO1        | + | 33750645  | 33752316  |
| chr5  | NM_001190470 | MTRNR2L2     | - | 79981574  | 79982610  |
| chr5  | NR_015370    | NCRNA00219   | + | 111524121 | 111526097 |
| chr20 | NM_032945    | TNFRSF6B     | + | 61796731  | 61800479  |
| chr5  | NM_002520    | NPM1         | + | 170747312 | 170770493 |
| chr5  | NM_001165899 | PDE4D        | - | 58300622  | 59819682  |
| chr5  | NM_181523    | PIK3R1       | + | 67558217  | 67633405  |
| chr5  | NM_001199380 | RNF145       | - | 158516994 | 158569639 |
| chr5  | NM_000997    | RPL37        | - | 40867186  | 40871144  |
| chr5  | NM_001025070 | RPS14        | - | 149803984 | 149809512 |
| chr5  | NM_001025    | RPS23        | - | 81604894  | 81609991  |

|      |              |          |   |           |           |
|------|--------------|----------|---|-----------|-----------|
| chr5 | NM_001142298 | SQSTM1   | + | 179165993 | 179197683 |
| chr5 | NM_003714    | STC2     | - | 172674331 | 172689112 |
| chr5 | NM_005642    | TAF7     | - | 140678240 | 140680535 |
| chr5 | NM_000358    | TGFBI    | + | 135392482 | 135427406 |
| chr5 | NM_006058    | TNIP1    | - | 150389698 | 150441190 |
| chr5 | NM_014402    | UQCQRQ   | + | 132230217 | 132232435 |
| chr4 | NM_001511    | CXCL1    | + | 74953972  | 74955819  |
| chr4 | NM_002089    | CXCL2    | - | 75181617  | 75183861  |
| chr4 | NM_002090    | CXCL3    | - | 75121175  | 75123354  |
| chr4 | NM_031372    | HNRPDL   | - | 83563370  | 83570402  |
| chr4 | NM_000584    | IL8      | + | 74825138  | 74828297  |
| chr4 | NM_033296    | MRFAP1   | + | 6693345   | 6695350   |
| chr4 | NM_000661    | RPL9     | - | 39132139  | 39136963  |
| chr4 | NM_001006    | RPS3A    | + | 152240203 | 152245254 |
| chr4 | NM_001017369 | SC4MOL   | + | 166468267 | 166483675 |
| chr4 | NM_001135147 | SLC39A8  | - | 103391220 | 103485433 |
| chr4 | NR_003584    | SNHG8    | + | 119419364 | 119420426 |
| chr9 | NM_000700    | ANXA1    | + | 74956600  | 74975127  |
| chr9 | NM_005347    | HSPA5    | - | 127036947 | 127043487 |
| chr9 | NM_000976    | RPL12    | - | 129249775 | 129253505 |
| chr9 | NM_007209    | RPL35    | - | 126659978 | 126664061 |
| chr9 | NM_000972    | RPL7A    | + | 135204889 | 135208101 |
| chr9 | NM_001010    | RPS6     | - | 19366253  | 19370235  |
| chr9 | NM_004099    | STOM     | - | 123141173 | 123172366 |
| chr9 | NM_001102420 | ZFAND5   | - | 74156160  | 74169983  |
| chr8 | NM_018482    | ASAP1    | - | 131133534 | 131483399 |
| chr8 | NR_027259    | C8orf39  | + | 94821514  | 94822223  |
| chr8 | NM_005195    | CEBPD    | - | 48812028  | 48813279  |
| chr8 | NM_001908    | CTSB     | - | 11737442  | 11763055  |
| chr8 | NM_001916    | CYC1     | + | 145221947 | 145224416 |
| chr8 | NM_001394    | DUSP4    | - | 29249538  | 29264104  |
| chr8 | NM_000127    | EXT1     | - | 118880782 | 119193239 |
| chr8 | NM_001080394 | KIAA0146 | + | 48336094  | 48811028  |
| chr8 | NM_002467    | MYC      | + | 128817496 | 128822862 |
| chr8 | NM_001199649 | PTK2     | - | 141737662 | 142080594 |
| chr8 | NR_003367    | PVT1     | + | 128875960 | 129182681 |
| chr8 | NM_000989    | RPL30    | - | 99123117  | 99126949  |
| chr8 | NM_000971    | RPL7     | - | 74365427  | 74368423  |
| chr8 | NM_000973    | RPL8     | - | 145985957 | 145988609 |
| chr8 | NM_001008539 | SLC7A2   | + | 17398974  | 17472352  |
| chr8 | NR_002599    | SNHG6    | - | 67996718  | 68000331  |
| chr8 | NM_025195    | TRIB1    | + | 126511744 | 126519826 |
| chr8 | NM_017890    | VPS13B   | + | 100094669 | 100958984 |
| chrX | NM_000109    | DMD      | - | 31047265  | 33267647  |
| chrX | NM_005342    | HMGB3    | + | 149902420 | 149909906 |
| chrX | NM_006013    | RPL10    | + | 153279764 | 153283874 |
| chrX | NM_002970    | SAT1     | + | 23711195  | 23714248  |



CLASS II GENES

|       |              |          |   |          |          |
|-------|--------------|----------|---|----------|----------|
| chr19 | NM_019112    | ABCA7    | + | 991101   | 1016570  |
| chr19 | NM_024876    | ADCK4    | - | 45889273 | 45914630 |
| chr19 | NM_005858    | AKAP8    | - | 15325334 | 15351603 |
| chr19 | NM_014371    | AKAP8L   | - | 15351858 | 15390833 |
| chr19 | NM_001098632 | AKT1S1   | - | 55064108 | 55072456 |
| chr19 | NM_001626    | AKT2     | - | 45428063 | 45483105 |
| chr19 | NM_001130524 | AP1M1    | + | 16169664 | 16207156 |
| chr19 | NM_004069    | AP2S1    | - | 52033262 | 52046043 |
| chr19 | NM_004886    | APBA3    | - | 3701770  | 3712673  |
| chr19 | NM_001199196 | ARMC6    | + | 19005386 | 19029987 |
| chr19 | NM_004317    | ASNA1    | + | 12709305 | 12720137 |
| chr19 | NM_020410    | ATP13A1  | - | 19617009 | 19635503 |
| chr19 | NM_001001975 | ATP5D    | + | 1192748  | 1195824  |
| chr19 | NM_030578    | B9D2     | - | 46552161 | 46561918 |
| chr19 | NM_138761    | BAX      | + | 54149928 | 54156867 |
| chr19 | NM_000709    | BCKDHA   | + | 46595533 | 46622750 |
| chr19 | NM_212550    | BLOC1S3  | + | 50373842 | 50376898 |
| chr19 | NM_033513    | C19orf20 | + | 458496   | 470654   |
| chr19 | NM_017914    | C19orf24 | + | 1226519  | 1230243  |
| chr19 | NM_152482    | C19orf25 | - | 1424199  | 1430228  |
| chr19 | NM_001080543 | C19orf29 | - | 3561626  | 3577813  |
| chr19 | NM_175871    | C19orf39 | + | 11346382 | 11348627 |
| chr19 | NM_152266    | C19orf40 | + | 38154987 | 38159800 |
| chr19 | NM_024104    | C19orf42 | - | 16617958 | 16631968 |
| chr19 | NM_032207    | C19orf44 | + | 16468204 | 16493163 |
| chr19 | NM_199249    | C19orf48 | - | 55992772 | 55999786 |
| chr19 | NM_001171948 | C19orf50 | + | 18529571 | 18541197 |
| chr19 | NM_138358    | C19orf52 | + | 10900423 | 10901916 |
| chr19 | NM_014047    | C19orf53 | + | 13746256 | 13750586 |
| chr19 | NM_024323    | C19orf57 | - | 13854167 | 13877909 |
| chr19 | NM_001033026 | C19orf6  | - | 960649   | 972141   |
| chr19 | NM_019108    | C19orf61 | - | 48927140 | 48950982 |
| chr19 | NM_175063    | C19orf63 | + | 55671547 | 55678420 |
| chr19 | NM_005184    | CALM3    | + | 51796351 | 51805879 |
| chr19 | NM_145046    | CALR3    | - | 16450874 | 16468003 |
| chr19 | NM_001003962 | CAPNS1   | + | 41322757 | 41333095 |
| chr19 | NM_017721    | CC2D1A   | + | 13877955 | 13902693 |
| chr19 | NM_032816    | CCDC123  | - | 38061743 | 38154709 |
| chr19 | NM_001136203 | CCDC124  | + | 17904823 | 17915794 |
| chr19 | NM_145045    | CCDC151  | - | 11392271 | 11406980 |
| chr19 | NM_018074    | CCDC94   | + | 4198110  | 4220085  |
| chr19 | NM_052848    | CCDC97   | + | 46507933 | 46522628 |
| chr19 | NM_001165895 | CD320    | - | 8273010  | 8279240  |

|       |              |          |   |          |          |
|-------|--------------|----------|---|----------|----------|
| chr19 | NM_012099    | CD3EAP   | + | 50601306 | 50605864 |
| chr19 | NM_007065    | CDC37    | - | 10362808 | 10375271 |
| chr19 | NM_006387    | CHERP    | - | 16489699 | 16514263 |
| chr19 | NM_014453    | CHMP2A   | - | 63754744 | 63758298 |
| chr19 | NM_007056    | CLASRP   | + | 50234137 | 50266054 |
| chr19 | NM_006012    | CLPP     | + | 6312462  | 6319915  |
| chr19 | NM_001199468 | CLPTM1   | + | 50150438 | 50188444 |
| chr19 | NM_007263    | COPE     | - | 18871322 | 18891199 |
| chr19 | NM_145232    | CTU1     | - | 56292674 | 56303459 |
| chr19 | NM_018959    | DAZAP1   | + | 1358583  | 1386682  |
| chr19 | NM_019070    | DDX49    | + | 18891483 | 18900442 |
| chr19 | NM_133328    | DEDD2    | - | 47394591 | 47413653 |
| chr19 | NM_001930    | DHPS     | - | 12647533 | 12653677 |
| chr19 | NM_014681    | DHX34    | + | 52544377 | 52577795 |
| chr19 | NM_001130823 | DNMT1    | - | 10105021 | 10166755 |
| chr19 | NM_139159    | DPP9     | - | 4626243  | 4674855  |
| chr19 | NM_001172774 | DPY19L3  | + | 37588494 | 37668639 |
| chr19 | NM_001161619 | DUS3L    | - | 5736152  | 5742249  |
| chr19 | NM_004714    | DYRK1B   | - | 45007829 | 45016681 |
| chr19 | NM_153232    | EID2     | - | 44721286 | 44722678 |
| chr19 | NM_152361    | EID2B    | - | 44713469 | 44715334 |
| chr19 | NM_013234    | EIF3K    | + | 43801561 | 43819435 |
| chr19 | NM_032377    | ELOF1    | - | 11524857 | 11531051 |
| chr19 | NM_001130072 | EPN1     | + | 60878372 | 60898945 |
| chr19 | NM_021235    | EPS15L1  | - | 16333407 | 16443762 |
| chr19 | NM_020158    | EXOSC5   | - | 46584115 | 46595096 |
| chr19 | NM_138401    | FAM125A  | + | 17391911 | 17397140 |
| chr19 | NM_014077    | FAM32A   | + | 16157234 | 16163857 |
| chr19 | NM_138411    | FAM71E1  | - | 55661856 | 55671815 |
| chr19 | NM_004461    | FARSA    | - | 12894283 | 12905558 |
| chr19 | NM_001436    | FBL      | - | 45016932 | 45028894 |
| chr19 | NM_001080469 | FBXO46   | - | 50905726 | 50925991 |
| chr19 | NM_032301    | FBXW9    | - | 12660729 | 12668455 |
| chr19 | NM_018708    | FEM1A    | + | 4742727  | 4746571  |
| chr19 | NM_032836    | FIZ1     | - | 60794548 | 60802705 |
| chr19 | NR_034159    | FLJ30403 | - | 56786847 | 56789445 |
| chr19 | NM_001171937 | FUZ      | - | 55001935 | 55008379 |
| chr19 | NM_016263    | FZR1     | + | 3457294  | 3487755  |
| chr19 | NM_001007270 | GEMIN7   | + | 50274357 | 50286622 |
| chr19 | NM_015710    | GLTSCR2  | + | 52940604 | 52952135 |
| chr19 | NM_001080452 | GPR108   | - | 6680924  | 6688633  |
| chr19 | NM_031485    | GRWD1    | + | 53640841 | 53648976 |
| chr19 | NM_019884    | GSK3A    | - | 47426177 | 47438576 |
| chr19 | NM_002096    | GTF2F1   | - | 6330579  | 6344291  |
| chr19 | NM_001161587 | GYS1     | - | 54163193 | 54188422 |
| chr19 | NM_181786    | HKR1     | + | 42517419 | 42547197 |
| chr19 | NM_005968    | HNRNPM   | + | 8415802  | 8459996  |

|       |              |                |   |          |          |
|-------|--------------|----------------|---|----------|----------|
| chr19 | NM_144732    | HNRNPUL1       | + | 46460230 | 46505651 |
| chr19 | NM_198704    | HSD11B1L       | + | 5632034  | 5639533  |
| chr19 | NM_004907    | IER2           | + | 13122281 | 13126718 |
| chr19 | NM_172374    | IL4I1          | - | 55084722 | 55124574 |
| chr19 | NM_012218    | ILF3           | + | 10625936 | 10664095 |
| chr19 | NM_006844    | ILVBL          | - | 15086784 | 15097577 |
| chr19 | NM_001007561 | IRGQ           | - | 48780358 | 48792127 |
| chr19 | NM_138334    | JOSD2          | - | 55701070 | 55706157 |
| chr19 | NM_002250    | KCNN4          | - | 48962524 | 48977249 |
| chr19 | NM_007059    | KPTN           | - | 52670211 | 52679333 |
| chr19 | NM_024316    | LENG1          | - | 59351190 | 59355258 |
| chr19 | NM_052925    | LENG8          | + | 59651876 | 59665008 |
| chr19 | NM_019104    | LIN37          | + | 40931351 | 40937260 |
| chr19 | NR_027334    | LOC100131691   | + | 63762364 | 63777976 |
| chr19 | NM_001171155 | LOC100131801   | + | 7600670  | 7602510  |
| chr19 | NR_033341    | LOC100379224   | - | 49301331 | 49309176 |
| chr19 | NR_024333    | LOC147727      | - | 10623537 | 10625548 |
| chr19 | NR_027301    | LOC148189      | - | 32973240 | 32976688 |
| chr19 | NR_026956    | LOC284440      | - | 19728180 | 19748222 |
| chr19 | NM_001195135 | LOC646862      | + | 63599268 | 63600258 |
| chr19 | NR_036504    | LOC728752      | + | 41672368 | 41673782 |
| chr19 | NM_001145784 | LOC729991      | - | 19148712 | 19164400 |
| chr19 | NM_005919    | LOC729991-MEF2 | - | 19117375 | 19164400 |
| chr19 | NM_004793    | LONP1          | - | 5642844  | 5671176  |
| chr19 | NM_001114093 | LSM14A         | + | 39355191 | 39412260 |
| chr19 | NM_012321    | LSM4           | - | 18278716 | 18295001 |
| chr19 | NM_016199    | LSM7           | - | 2272519  | 2279614  |
| chr19 | NM_030662    | MAP2K2         | - | 4041319  | 4075126  |
| chr19 | NM_145185    | MAP2K7         | + | 7874764  | 7885363  |
| chr19 | NM_015329    | MAU2           | + | 19292629 | 19330563 |
| chr19 | NM_003926    | MBD3           | - | 1527677  | 1543652  |
| chr19 | NM_001146056 | MBOAT7         | - | 59368917 | 59385545 |
| chr19 | NM_020533    | MCOLN1         | + | 7493495  | 7504895  |
| chr19 | NM_030973    | MED25          | + | 55013347 | 55032049 |
| chr19 | NM_017592    | MED29          | + | 44573802 | 44583043 |
| chr19 | NM_001410    | MEGF8          | + | 47521600 | 47574761 |
| chr19 | NR_029495    | MIR23A         | - | 13808400 | 13808473 |
| chr19 | NR_029497    | MIR24-2        | - | 13808100 | 13808173 |
| chr19 | NR_029501    | MIR27A         | - | 13808253 | 13808331 |
| chr19 | NM_017572    | MKNK2          | - | 1988469  | 2002243  |
| chr19 | NM_172251    | MRPL54         | + | 3713664  | 3718563  |
| chr19 | NM_033362    | MRPS12         | + | 44113187 | 44115499 |
| chr19 | NM_001130065 | MYO9B          | + | 17047590 | 17185104 |
| chr19 | NM_001012643 | MYPOP          | - | 51085120 | 51097702 |
| chr19 | NM_003422    | MZF1           | - | 63765095 | 63776754 |
| chr19 | NM_020170    | NCLN           | + | 3136874  | 3160573  |
| chr19 | NM_001193375 | NDUFA11        | - | 5842286  | 5855024  |

|       |              |          |   |          |          |
|-------|--------------|----------|---|----------|----------|
| chr19 | NM_015965    | NDUFA13  | + | 19488018 | 19500013 |
| chr19 | NM_004542    | NDUFA3   | + | 59297971 | 59302093 |
| chr19 | NM_005001    | NDUFA7   | - | 8282233  | 8292280  |
| chr19 | NM_004146    | NDUFB7   | - | 14537889 | 14543889 |
| chr19 | NM_024407    | NDUFS7   | + | 1334882  | 1346588  |
| chr19 | NM_001001716 | NFKBIB   | + | 44082454 | 44091374 |
| chr19 | NM_015953    | NOSIP    | - | 54750779 | 54775615 |
| chr19 | NM_007121    | NR1H2    | + | 55571496 | 55578079 |
| chr19 | NM_001105570 | NUDT19   | + | 37874706 | 37896542 |
| chr19 | NM_016553    | NUP62    | - | 55101893 | 55124800 |
| chr19 | NM_001017989 | OPA3     | - | 50722864 | 50779962 |
| chr19 | NM_019088    | PAF1     | - | 44568109 | 44573519 |
| chr19 | NM_032346    | PDCD2L   | + | 39587142 | 39608912 |
| chr19 | NM_012088    | PGLS     | + | 17483431 | 17493097 |
| chr19 | NM_015897    | PIAS4    | + | 3958748  | 3989067  |
| chr19 | NM_017916    | PIH1D1   | - | 54641361 | 54646927 |
| chr19 | NM_005027    | PIK3R2   | + | 18125015 | 18142343 |
| chr19 | NM_018049    | PLEKHJ1  | - | 2184154  | 2187328  |
| chr19 | NM_007254    | PNKP     | - | 55056271 | 55062634 |
| chr19 | NM_002691    | POLD1    | + | 55579404 | 55613083 |
| chr19 | NM_002695    | POLR2E   | - | 1037577  | 1046391  |
| chr19 | NM_005035    | POLRMT   | - | 568222   | 584568   |
| chr19 | NM_006627    | POP4     | + | 34789009 | 34800002 |
| chr19 | NM_020230    | PPAN     | + | 10077898 | 10082975 |
| chr19 | NM_001142502 | PPP1R13L | - | 50574731 | 50601447 |
| chr19 | NM_014225    | PPP2R1A  | + | 57384866 | 57421490 |
| chr19 | NM_006247    | PPP5C    | + | 51542133 | 51585945 |
| chr19 | NM_014931    | PPP6R1   | - | 60432958 | 60461850 |
| chr19 | NM_005809    | PRDX2    | - | 12768633 | 12773694 |
| chr19 | NM_001001329 | PRKCSH   | + | 11407268 | 11422782 |
| chr19 | NM_001536    | PRMT1    | + | 54872307 | 54883516 |
| chr19 | NM_015629    | PRPF31   | + | 59310601 | 59326962 |
| chr19 | NM_000951    | PRRG2    | + | 54776398 | 54786077 |
| chr19 | NM_172341    | PSENFEN  | + | 40928333 | 40929743 |
| chr19 | NM_006503    | PSMC4    | + | 45168912 | 45179193 |
| chr19 | NM_002812    | PSMD8    | + | 43557029 | 43566304 |
| chr19 | NM_002819    | PTBP1    | + | 748391   | 763327   |
| chr19 | NM_001163377 | QPCTL    | + | 50887580 | 50899088 |
| chr19 | NM_004218    | RAB11B   | + | 8361204  | 8375317  |
| chr19 | NM_005370    | RAB8A    | + | 16083489 | 16105445 |
| chr19 | NM_005053    | RAD23A   | + | 12917653 | 12925455 |
| chr19 | NM_003624    | RANBP3   | - | 5867151  | 5929320  |
| chr19 | NM_133452    | RAVER1   | - | 10287888 | 10305314 |
| chr19 | NM_024321    | RBM42    | + | 40811819 | 40820427 |
| chr19 | NM_020695    | REXO1    | - | 1766244  | 1799452  |
| chr19 | NM_002918    | RFX1     | - | 13933341 | 13978134 |
| chr19 | NM_003721    | RFXANK   | + | 19164007 | 19173678 |

|       |              |           |   |          |          |
|-------|--------------|-----------|---|----------|----------|
| chr19 | NM_000979    | RPL18     | - | 53810399 | 53814245 |
| chr19 | NM_001009    | RPS5      | + | 63590447 | 63597983 |
| chr19 | NM_006666    | RUVBL2    | + | 54188967 | 54210994 |
| chr19 | NM_001145713 | SAE1      | + | 52325919 | 52405733 |
| chr19 | NM_002967    | SAFB      | + | 5574163  | 5619489  |
| chr19 | NM_014649    | SAFB2     | - | 5538009  | 5573938  |
| chr19 | NM_001145901 | SARS2     | - | 44097743 | 44113376 |
| chr19 | NM_021228    | SCAF1     | + | 54837193 | 54853718 |
| chr19 | NM_007165    | SF3A2     | + | 2187815  | 2199678  |
| chr19 | NM_003021    | SGTA      | - | 2705711  | 2734354  |
| chr19 | NM_001193286 | SIRT2     | - | 44061034 | 44082342 |
| chr19 | NM_001193285 | SIRT6     | - | 4125105  | 4133596  |
| chr19 | NM_175875    | SIX5      | - | 50959882 | 50964337 |
| chr19 | NM_024881    | SLC35E1   | - | 16521647 | 16544193 |
| chr19 | NM_144564    | SLC39A3   | - | 2683522  | 2691074  |
| chr19 | NM_001128844 | SMARCA4   | + | 10932597 | 11033958 |
| chr19 | NR_000012    | SNORA68   | + | 17834396 | 17834529 |
| chr19 | NR_000021    | SNORD32A  | + | 54685034 | 54685116 |
| chr19 | NR_000020    | SNORD33   | + | 54685685 | 54685768 |
| chr19 | NR_000019    | SNORD34   | + | 54685975 | 54686041 |
| chr19 | NR_000018    | SNORD35A  | + | 54686243 | 54686329 |
| chr19 | NR_001285    | SNORD35B  | + | 54692787 | 54692874 |
| chr19 | NM_003089    | SNRNP70   | + | 54280276 | 54303682 |
| chr19 | NM_004596    | SNRPA     | + | 45948598 | 45963137 |
| chr19 | NM_004597    | SNRPD2    | - | 50882551 | 50887283 |
| chr19 | NM_182513    | SPC24     | - | 11118830 | 11127484 |
| chr19 | NM_020126    | SPHK2     | + | 53814359 | 53825474 |
| chr19 | NM_001077238 | SPPL2B    | + | 2279628  | 2306100  |
| chr19 | NM_003765    | STX10     | - | 13116223 | 13121987 |
| chr19 | NM_172231    | SUGP1     | - | 19248321 | 19292307 |
| chr19 | NM_014884    | SUGP2     | - | 18962696 | 19005380 |
| chr19 | NM_001111020 | SUPT5H    | + | 44628025 | 44659148 |
| chr19 | NM_001105578 | SYCE2     | - | 12870893 | 12891086 |
| chr19 | NM_004819    | SYMPK     | - | 51010539 | 51058388 |
| chr19 | NM_012451    | SYNGR4    | + | 53559462 | 53571446 |
| chr19 | NM_001168222 | TBC1D17   | + | 55072493 | 55083819 |
| chr19 | NM_001281    | TBCB      | + | 41297727 | 41308689 |
| chr19 | NM_013342    | TFPT      | - | 59302131 | 59310867 |
| chr19 | NM_003249    | THOP1     | + | 2736505  | 2764599  |
| chr19 | NM_012458    | TIMM13    | - | 2376621  | 2378875  |
| chr19 | NM_006858    | TMED1     | - | 10804113 | 10807983 |
| chr19 | NM_018273    | TMEM143   | - | 53527427 | 53558998 |
| chr19 | NM_152784    | TMEM146   | + | 5671687  | 5729742  |
| chr19 | NM_032635    | TMEM147   | + | 40728384 | 40730268 |
| chr19 | NM_001098825 | TMEM91    | + | 46561710 | 46581827 |
| chr19 | NM_001128916 | TOMM40    | + | 50086316 | 50098786 |
| chr19 | NR_002166    | TRAPPC2P1 | + | 62566690 | 62568533 |

|       |              |          |   |          |          |
|-------|--------------|----------|---|----------|----------|
| chr19 | NM_001042462 | TRAPPC5  | + | 7651706  | 7653748  |
| chr19 | NM_024108    | TRAPPC6A | - | 50358025 | 50373325 |
| chr19 | NM_005762    | TRIM28   | + | 63747647 | 63753894 |
| chr19 | NM_001136035 | TRMT1    | - | 13076713 | 13088563 |
| chr19 | NM_024075    | TSEN34   | + | 59385930 | 59390206 |
| chr19 | NM_032037    | TSSK6    | - | 19486027 | 19487469 |
| chr19 | NM_001040425 | U2AF1L4  | - | 40925267 | 40928176 |
| chr19 | NM_001012478 | U2AF2    | + | 60857227 | 60877894 |
| chr19 | NM_005499    | UBA2     | + | 39611107 | 39652638 |
| chr19 | NM_001033930 | UBA52    | + | 18543613 | 18549270 |
| chr19 | NM_003969    | UBE2M    | - | 63758890 | 63762155 |
| chr19 | NM_001048241 | UBL5     | + | 9799567  | 9801797  |
| chr19 | NM_002911    | UPF1     | + | 18803743 | 18840039 |
| chr19 | NM_006830    | UQCR11   | - | 1548153  | 1556483  |
| chr19 | NM_006003    | UQCRFS1  | - | 34390006 | 34395976 |
| chr19 | NM_018467    | USE1     | + | 17187154 | 17191638 |
| chr19 | NM_001025778 | VRK3     | - | 55171535 | 55220617 |
| chr19 | NM_024100    | WDR18    | + | 935327   | 945569   |
| chr19 | NM_001083961 | WDR62    | + | 41237622 | 41287852 |
| chr19 | NM_020196    | XAB2     | - | 7590410  | 7600439  |
| chr19 | NM_006297    | XRCC1    | - | 48739303 | 48771570 |
| chr19 | NM_024029    | YIPF2    | - | 10894443 | 10900357 |
| chr19 | NM_032792    | ZBTB45   | - | 63716708 | 63722733 |
| chr19 | NM_015168    | ZC3H4    | - | 52259286 | 52308849 |
| chr19 | NM_001083335 | ZFP112   | - | 49522545 | 49552696 |
| chr19 | NM_001099638 | ZNF146   | + | 41397343 | 41421515 |
| chr19 | NM_006959    | ZNF17    | + | 62614340 | 62625119 |
| chr19 | NM_007147    | ZNF175   | + | 56766342 | 56784803 |
| chr19 | NM_013256    | ZNF180   | - | 49671698 | 49696414 |
| chr19 | NM_001029997 | ZNF181   | + | 39917319 | 39925614 |
| chr19 | NM_013398    | ZNF224   | + | 49290321 | 49304319 |
| chr19 | NM_013362    | ZNF225   | + | 49309387 | 49329095 |
| chr19 | NM_001032373 | ZNF226   | + | 49361088 | 49373678 |
| chr19 | NM_006300    | ZNF230   | + | 49198916 | 49209912 |
| chr19 | NM_001012756 | ZNF260   | - | 41693428 | 41711088 |
| chr19 | NM_003417    | ZNF264   | + | 62394679 | 62426026 |
| chr19 | NM_006631    | ZNF266   | - | 9384270  | 9407234  |
| chr19 | NM_001037813 | ZNF284   | + | 49268136 | 49283463 |
| chr19 | NM_001012320 | ZNF302   | + | 39860406 | 39869142 |
| chr19 | NM_020657    | ZNF304   | + | 62554456 | 62563077 |
| chr19 | NM_001190791 | ZNF317   | + | 9112055  | 9135091  |
| chr19 | NM_014347    | ZNF324   | + | 63670223 | 63676757 |
| chr19 | NM_003419    | ZNF345   | + | 42033106 | 42062310 |
| chr19 | NM_021632    | ZNF350   | - | 57159404 | 57181891 |
| chr19 | NM_001098491 | ZNF419   | + | 62690890 | 62697860 |
| chr19 | NM_144689    | ZNF420   | + | 42261221 | 42312491 |
| chr19 | NM_182498    | ZNF428   | - | 48803215 | 48815854 |

|       |              |         |   |          |          |
|-------|--------------|---------|---|----------|----------|
| chr19 | NM_014650    | ZNF432  | - | 57228488 | 57243885 |
| chr19 | NM_018337    | ZNF444  | + | 61344367 | 61364074 |
| chr19 | NM_017908    | ZNF446  | + | 63679606 | 63684409 |
| chr19 | NM_003425    | ZNF45   | - | 49108615 | 49131251 |
| chr19 | NM_006635    | ZNF460  | + | 62483664 | 62497248 |
| chr19 | NM_153257    | ZNF461  | - | 41820122 | 41849579 |
| chr19 | NM_001006656 | ZNF473  | + | 55221023 | 55243843 |
| chr19 | NM_020714    | ZNF490  | - | 12547919 | 12582623 |
| chr19 | NM_198458    | ZNF497  | - | 63557536 | 63565932 |
| chr19 | NM_153219    | ZNF524  | + | 60803541 | 60806316 |
| chr19 | NM_133444    | ZNF526  | + | 47416331 | 47424193 |
| chr19 | NM_032453    | ZNF527  | + | 42553898 | 42575806 |
| chr19 | NM_020880    | ZNF530  | + | 62803064 | 62811449 |
| chr19 | NM_213598    | ZNF543  | + | 62523676 | 62533956 |
| chr19 | NM_178544    | ZNF546  | + | 45194782 | 45215354 |
| chr19 | NM_173631    | ZNF547  | + | 62566702 | 62582737 |
| chr19 | NM_001172773 | ZNF548  | + | 62593029 | 62605731 |
| chr19 | NM_001199295 | ZNF549  | + | 62730504 | 62744056 |
| chr19 | NM_138347    | ZNF551  | + | 62885168 | 62892981 |
| chr19 | NM_001102651 | ZNF554  | + | 2770871  | 2787733  |
| chr19 | NM_152289    | ZNF561  | - | 9579001  | 9592916  |
| chr19 | NM_144976    | ZNF564  | - | 12497183 | 12523356 |
| chr19 | NM_001042474 | ZNF565  | - | 41365026 | 41397826 |
| chr19 | NM_001145343 | ZNF566  | - | 41627860 | 41672303 |
| chr19 | NM_152484    | ZNF569  | - | 42593899 | 42650179 |
| chr19 | NM_016536    | ZNF571  | - | 42746994 | 42777513 |
| chr19 | NM_022752    | ZNF574  | + | 47272129 | 47277560 |
| chr19 | NM_174945    | ZNF575  | + | 48729179 | 48732124 |
| chr19 | NM_024327    | ZNF576  | + | 48792383 | 48796427 |
| chr19 | NM_016535    | ZNF581  | + | 60846797 | 60848801 |
| chr19 | NM_001159860 | ZNF583  | + | 61607194 | 61628212 |
| chr19 | NM_152655    | ZNF585A | - | 42332840 | 42355455 |
| chr19 | NM_152279    | ZNF585B | - | 42364320 | 42393291 |
| chr19 | NM_017652    | ZNF586  | + | 62972836 | 62983796 |
| chr19 | NM_001007248 | ZNF599  | - | 39940818 | 39955974 |
| chr19 | NM_001031721 | ZNF613  | + | 57122499 | 57140823 |
| chr19 | NM_025040    | ZNF614  | - | 57208388 | 57223492 |
| chr19 | NM_001199324 | ZNF615  | - | 57186398 | 57203295 |
| chr19 | NM_033113    | ZNF628  | + | 60679510 | 60687666 |
| chr19 | NM_001023561 | ZNF749  | + | 62638504 | 62649003 |
| chr19 | NM_001024596 | ZNF772  | - | 62672765 | 62680750 |
| chr19 | NM_173632    | ZNF776  | + | 62949975 | 62961339 |
| chr19 | NM_001002836 | ZNF787  | - | 61290543 | 61324461 |
| chr19 | NM_206894    | ZNF790  | - | 42000170 | 42021124 |
| chr19 | NM_153358    | ZNF791  | + | 12582731 | 12601676 |
| chr19 | NM_021089    | ZNF8    | + | 63482129 | 63499066 |
| chr19 | NM_001023563 | ZNF805  | + | 62443864 | 62465918 |

|       |              |                |   |          |          |
|-------|--------------|----------------|---|----------|----------|
| chr19 | NM_001037232 | ZNF829         | - | 42070865 | 42099033 |
| chr19 | NM_001129730 | ZNF837         | - | 63570801 | 63584201 |
| chr19 | NM_001077624 | ZNF846         | - | 9729150  | 9740410  |
| chr19 | NM_181846    | ZSCAN22        | + | 63530196 | 63545524 |
| chr17 | NM_012138    | AATF           | + | 32380287 | 32488284 |
| chr17 | NM_172232    | ABCA5          | - | 64752170 | 64834918 |
| chr17 | NM_001185039 | ACOX1          | - | 71449186 | 71487110 |
| chr17 | NM_003488    | AKAP1          | + | 52517551 | 52553709 |
| chr17 | NM_017758    | ALKBH5         | + | 18027591 | 18053992 |
| chr17 | NM_001165960 | ALOXE3         | - | 7939942  | 7962959  |
| chr17 | NM_001033569 | AMZ2           | + | 63755739 | 63764900 |
| chr17 | NR_026903    | AMZ2P1         | - | 60393129 | 60402165 |
| chr17 | NM_001002244 | ANAPC11        | + | 77442894 | 77451655 |
| chr17 | NM_052855    | ANKRD40        | - | 46125549 | 46140269 |
| chr17 | NM_001040025 | ARL16          | - | 77258628 | 77261359 |
| chr17 | NM_024857    | ATAD5          | + | 26183148 | 26246421 |
| chr17 | NM_145691    | ATPAF2         | - | 17862058 | 17883205 |
| chr17 | NM_015681    | B9D1           | - | 19187075 | 19206639 |
| chr17 | NM_003766    | BECN1          | - | 38215675 | 38229836 |
| chr17 | NM_007294    | BRCA1          | - | 38449837 | 38531026 |
| chr17 | NM_001113324 | C17orf106      | + | 71486892 | 71508262 |
| chr17 | NR_037709    | C17orf106-CDK3 | + | 71486892 | 71513675 |
| chr17 | NM_024052    | C17orf39       | + | 17883335 | 17912443 |
| chr17 | NM_024683    | C17orf42       | - | 26250126 | 26257412 |
| chr17 | NM_020233    | C17orf48       | + | 10541651 | 10555600 |
| chr17 | NM_001142798 | C17orf49       | + | 6858779  | 6861567  |
| chr17 | NM_144679    | C17orf56       | - | 76816671 | 76827486 |
| chr17 | NM_001077498 | C17orf63       | - | 24107122 | 24193967 |
| chr17 | NM_178542    | C17orf65       | - | 39608877 | 39619608 |
| chr17 | NM_018149    | C17orf71       | + | 54642152 | 54647393 |
| chr17 | NM_022344    | C17orf75       | - | 27682501 | 27693302 |
| chr17 | NM_203415    | C17orf81       | + | 7096095  | 7103983  |
| chr17 | NM_001114118 | C17orf85       | - | 3661208  | 3696289  |
| chr17 | NR_027058    | C17orf86       | + | 72596319 | 72602663 |
| chr17 | NM_001039842 | C17orf90       | - | 77242470 | 77244023 |
| chr17 | NR_028502    | C17orf91       | - | 1561547  | 1566316  |
| chr17 | NM_001013672 | C17orf97       | + | 260433   | 264803   |
| chr17 | NM_001212    | C1QBP          | - | 5276822  | 5283195  |
| chr17 | NM_001159772 | CANT1          | - | 74499392 | 74517494 |
| chr17 | NM_020753    | CASKIN2        | - | 71007936 | 71023222 |
| chr17 | NM_213607    | CCDC103        | + | 40332679 | 40336155 |
| chr17 | NM_199287    | CCDC137        | + | 77244165 | 77251341 |
| chr17 | NM_001099225 | CCDC43         | - | 40110330 | 40122691 |
| chr17 | NM_138363    | CCDC45         | + | 59933619 | 59964524 |
| chr17 | NM_020198    | CCDC47         | - | 59176341 | 59204820 |
| chr17 | NM_001040431 | CCDC56         | - | 38203177 | 38204230 |
| chr17 | NM_198082    | CCDC57         | - | 77652634 | 77763978 |



|       |              |          |   |          |          |
|-------|--------------|----------|---|----------|----------|
| chr17 | NM_001193529 | CCT6B    | - | 30278990 | 30312641 |
| chr17 | NM_001251    | CD68     | + | 7423528  | 7426153  |
| chr17 | NM_001114091 | CDC27    | - | 42550309 | 42621664 |
| chr17 | NM_001254    | CDC6     | + | 35697671 | 35712939 |
| chr17 | NM_015083    | CDK12    | + | 34871264 | 34944326 |
| chr17 | NM_176096    | CDK5RAP3 | + | 43403427 | 43414146 |
| chr17 | NM_024591    | CHMP6    | + | 76580235 | 76588528 |
| chr17 | NM_004859    | CLTC     | + | 55051831 | 55129099 |
| chr17 | NM_173478    | CNTD1    | + | 38204379 | 38217131 |
| chr17 | NM_001037144 | CNTROB   | + | 7776197  | 7793621  |
| chr17 | NM_001042529 | COASY    | + | 37967617 | 37971821 |
| chr17 | NR_027941    | COX11    | - | 50384257 | 50401063 |
| chr17 | NM_005206    | CRK      | - | 1272207  | 1306294  |
| chr17 | NM_015343    | CTDNBP1  | - | 7087629  | 7095983  |
| chr17 | NM_017748    | CWC25    | - | 34210971 | 34235115 |
| chr17 | NM_001915    | CYB561   | - | 58863396 | 58877454 |
| chr17 | NM_144607    | CYB5D1   | + | 7701788  | 7706325  |
| chr17 | NM_144611    | CYB5D2   | + | 3993210  | 4007740  |
| chr17 | NM_025104    | DBF4B    | + | 40141501 | 40185162 |
| chr17 | NR_024120    | DBIL5P   | + | 602649   | 605326   |
| chr17 | NM_005828    | DCAF7    | + | 58981553 | 59025373 |
| chr17 | NM_024819    | DCAKD    | - | 40456231 | 40493999 |
| chr17 | NM_007372    | DDX42    | + | 59205298 | 59250409 |
| chr17 | NM_016041    | DERL2    | - | 5318336  | 5330218  |
| chr17 | NM_144683    | DHRS13   | - | 24248924 | 24254215 |
| chr17 | NM_015510    | DHRS7B   | + | 20970849 | 21035428 |
| chr17 | NM_001199699 | DHX33    | - | 5284955  | 5313104  |
| chr17 | NM_004941    | DHX8     | + | 38916859 | 38957206 |
| chr17 | NM_001365    | DLG4     | - | 7033933  | 7064093  |
| chr17 | NM_003315    | DNAJC7   | - | 37381964 | 37423241 |
| chr17 | NM_001388    | DRG2     | + | 17932007 | 17952017 |
| chr17 | NM_022156    | DUS1L    | - | 77609039 | 77616969 |
| chr17 | NM_004422    | DVL2     | - | 7069384  | 7078587  |
| chr17 | NM_001142605 | EFTUD2   | - | 40283180 | 40332519 |
| chr17 | NM_014740    | EIF4A3   | - | 75723607 | 75735577 |
| chr17 | NM_001143760 | EIF5A    | + | 7151041  | 7156506  |
| chr17 | NM_001165962 | ELAC2    | - | 12835653 | 12862106 |
| chr17 | NM_001166131 | EME1     | + | 45805579 | 45813819 |
| chr17 | NM_005702    | ERAL1    | + | 24206168 | 24212198 |
| chr17 | NM_001013839 | EXOC7    | - | 71588680 | 71611463 |
| chr17 | NM_001991    | EZH1     | - | 38105818 | 38150597 |
| chr17 | NM_178126    | FAM134C  | - | 37985051 | 38014971 |
| chr17 | NM_144997    | FLCN     | - | 17056251 | 17081227 |
| chr17 | NM_001164637 | FLJ35220 | + | 76003561 | 76026479 |
| chr17 | NM_017647    | FTSJ3    | - | 59250524 | 59258763 |
| chr17 | NM_004860    | FXR2     | - | 7435271  | 7458940  |
| chr17 | NM_138387    | G6PC3    | + | 39503623 | 39509238 |

|       |              |              |   |          |          |
|-------|--------------|--------------|---|----------|----------|
| chr17 | NM_000152    | GAA          | + | 75689949 | 75708274 |
| chr17 | NM_024835    | GGNBP2       | + | 31974849 | 32020389 |
| chr17 | NM_016080    | GLOD4        | - | 609298   | 632321   |
| chr17 | NM_001007024 | GOSR1        | + | 25828551 | 25877958 |
| chr17 | NM_004287    | GOSR2        | + | 42355484 | 42373732 |
| chr17 | NM_001002909 | GPATCH8      | - | 39828170 | 39936483 |
| chr17 | NM_203506    | GRB2         | - | 70825751 | 70913385 |
| chr17 | NM_002087    | GRN          | + | 39778016 | 39785996 |
| chr17 | NM_031965    | GSG2         | + | 3573945  | 3576741  |
| chr17 | NM_144608    | HEXIM2       | + | 40594046 | 40603189 |
| chr17 | NM_004712    | HGS          | + | 77261366 | 77279556 |
| chr17 | NM_001545    | ICT1         | + | 70520374 | 70528951 |
| chr17 | NM_174887    | IFT20        | - | 23679479 | 23686622 |
| chr17 | NM_001135642 | INPP5K       | - | 1344620  | 1366932  |
| chr17 | NM_020748    | INTS2        | - | 57297509 | 57360159 |
| chr17 | NM_021078    | KAT2A        | - | 37518654 | 37526908 |
| chr17 | NM_015353    | KCTD2        | + | 70554873 | 70573576 |
| chr17 | NM_014680    | KIAA0100     | - | 23965584 | 23996300 |
| chr17 | NM_014738    | KIAA0195     | + | 70964258 | 71008128 |
| chr17 | NM_015229    | KIAA0664     | - | 2539429  | 2561677  |
| chr17 | NM_014804    | KIAA0753     | - | 6422368  | 6484971  |
| chr17 | NM_001080443 | KIF18B       | - | 40358973 | 40380608 |
| chr17 | NM_006455    | LEPREL4      | - | 37211730 | 37221977 |
| chr17 | NM_013975    | LIG3         | + | 30331629 | 30356201 |
| chr17 | NR_027412    | LOC100130581 | - | 38802738 | 38821792 |
| chr17 | NR_034082    | LOC100130950 | + | 5036102  | 5079655  |
| chr17 | NR_036551    | LOC100131347 | + | 34466797 | 34491230 |
| chr17 | NR_029376    | LOC100294362 | - | 75940225 | 76003563 |
| chr17 | NR_028514    | LOC100306951 | + | 1366962  | 1368140  |
| chr17 | NM_033413    | LRRRC46      | + | 43263991 | 43270078 |
| chr17 | NM_018509    | LRRRC59      | - | 45813592 | 45829913 |
| chr17 | NM_006107    | LUC7L3       | + | 46151924 | 46185071 |
| chr17 | NM_003954    | MAP3K14      | - | 40696270 | 40750197 |
| chr17 | NM_139032    | MAPK7        | + | 19221626 | 19227450 |
| chr17 | NM_001123066 | MAPT         | + | 41327541 | 41461546 |
| chr17 | NM_017643    | MBTD1        | - | 46609784 | 46692426 |
| chr17 | NM_001001683 | MED11        | + | 4581471  | 4583645  |
| chr17 | NM_001079518 | MED24        | - | 35428875 | 35464415 |
| chr17 | NM_024311    | MFSD11       | + | 72245377 | 72286933 |
| chr17 | NM_001024937 | MINK1        | + | 4683302  | 4742135  |
| chr17 | NR_029493    | MIR21        | + | 55273408 | 55273480 |
| chr17 | NR_037447    | MIR3676      | + | 8031217  | 8031302  |
| chr17 | NR_029945    | MIR423       | + | 25468222 | 25468316 |
| chr17 | NR_030366    | MIR636       | - | 72244126 | 72244225 |
| chr17 | NM_024039    | MIS12        | + | 5330970  | 5334854  |
| chr17 | NM_020310    | MNT          | - | 2234103  | 2251008  |
| chr17 | NM_004870    | MPDU1        | + | 7427688  | 7432251  |

|       |              |           |   |          |          |
|-------|--------------|-----------|---|----------|----------|
| chr17 | NM_024864    | MRM1      | + | 32032137 | 32039520 |
| chr17 | NM_145255    | MRPL10    | - | 43255636 | 43263906 |
| chr17 | NM_002949    | MRPL12    | + | 77280804 | 77284961 |
| chr17 | NM_016504    | MRPL27    | - | 45800226 | 45805561 |
| chr17 | NM_032351    | MRPL45    | + | 33706516 | 33732628 |
| chr17 | NR_033934    | MRPL45P2  | - | 42882591 | 42924985 |
| chr17 | NM_016070    | MRPS23    | - | 53271285 | 53282432 |
| chr17 | NM_015971    | MRPS7     | + | 70769343 | 70774052 |
| chr17 | NM_004687    | MTMR4     | - | 53921891 | 53950250 |
| chr17 | NM_001105538 | MYBBP1A   | - | 4388939  | 4405430  |
| chr17 | NM_001163735 | MYO19     | - | 31925711 | 31965418 |
| chr17 | NM_001199155 | MYST2     | + | 45220979 | 45261457 |
| chr17 | NM_001038618 | NARF      | + | 78009348 | 78039432 |
| chr17 | NM_015654    | NAT9      | - | 70278280 | 70284065 |
| chr17 | NM_031862    | NBR1      | + | 38576023 | 38719233 |
| chr17 | NR_003108    | NBR2      | + | 38531125 | 38550651 |
| chr17 | NM_001025579 | NDEL1     | + | 8279903  | 8312206  |
| chr17 | NM_003204    | NFE2L1    | + | 43480684 | 43493906 |
| chr17 | NM_001001349 | NKIRAS2   | + | 37423119 | 37431182 |
| chr17 | NM_001014445 | NLE1      | - | 30482480 | 30493435 |
| chr17 | NM_001033053 | NLRP1     | - | 5345442  | 5428556  |
| chr17 | NM_000269    | NME1      | + | 46585918 | 46594449 |
| chr17 | NM_001018136 | NME1-NME2 | + | 46585895 | 46604104 |
| chr17 | NM_021079    | NMT1      | + | 40494205 | 40541908 |
| chr17 | NM_015462    | NOL11     | + | 63144522 | 63170728 |
| chr17 | NM_017921    | NPLOC4    | - | 77134356 | 77214543 |
| chr17 | NM_020772    | NUFIP2    | - | 24606979 | 24645292 |
| chr17 | NM_024844    | NUP85     | + | 70713191 | 70743449 |
| chr17 | NM_002532    | NUP88     | - | 5230069  | 5263783  |
| chr17 | NM_000918    | P4HB      | - | 77394322 | 77411833 |
| chr17 | NM_148172    | PEMT      | - | 17349601 | 17435719 |
| chr17 | NM_000286    | PEX12     | - | 30925926 | 30929769 |
| chr17 | NM_024419    | PGS1      | + | 73886329 | 73932234 |
| chr17 | NM_002634    | PHB       | - | 44836418 | 44847241 |
| chr17 | NM_001033561 | PHF12     | - | 24256396 | 24302634 |
| chr17 | NM_024297    | PHF23     | - | 7079070  | 7083549  |
| chr17 | NM_004278    | PIGL      | + | 16061233 | 16170298 |
| chr17 | NM_178517    | PIGW      | + | 31965515 | 31969263 |
| chr17 | NM_003559    | PIP4K2B   | - | 34175469 | 34209684 |
| chr17 | NM_018129    | PNPO      | + | 43373887 | 43381673 |
| chr17 | NM_015584    | POLDIP2   | - | 23697785 | 23708730 |
| chr17 | NM_007215    | POLG2     | - | 59904363 | 59923646 |
| chr17 | NM_000937    | POLR2A    | + | 7328421  | 7358659  |
| chr17 | NM_003620    | PPM1D     | + | 56032325 | 56098422 |
| chr17 | NM_006445    | PRPF8     | - | 1500672  | 1534926  |
| chr17 | NM_002795    | PSMB3     | + | 34162527 | 34174004 |
| chr17 | NM_002798    | PSMB6     | + | 4646414  | 4648748  |

|       |              |          |   |          |          |
|-------|--------------|----------|---|----------|----------|
| chr17 | NM_013290    | PSMC3IP  | - | 37977854 | 37983273 |
| chr17 | NM_002805    | PSMC5    | + | 59258501 | 59263119 |
| chr17 | NM_002815    | PSMD11   | + | 27795614 | 27832155 |
| chr17 | NM_002816    | PSMD12   | - | 62767080 | 62793183 |
| chr17 | NM_002809    | PSMD3    | + | 35390585 | 35407738 |
| chr17 | NM_005789    | PSME3    | + | 38238948 | 38249303 |
| chr17 | NM_016077    | PTRH2    | - | 55129448 | 55139638 |
| chr17 | NM_004583    | RAB5C    | - | 37530522 | 37560548 |
| chr17 | NM_058216    | RAD51C   | + | 54124961 | 54166691 |
| chr17 | NM_004259    | RECQL5   | - | 71134544 | 71174860 |
| chr17 | NM_015528    | RNF167   | + | 4784374  | 4789262  |
| chr17 | NM_018146    | RNMTL1   | + | 632262   | 642491   |
| chr17 | NM_001033002 | RPAIN    | + | 5263684  | 5277064  |
| chr17 | NM_000981    | RPL19    | + | 34610061 | 34614506 |
| chr17 | NM_003161    | RPS6KB1  | + | 55325224 | 55382568 |
| chr17 | NM_018346    | RSAD1    | + | 45911188 | 45918335 |
| chr17 | NM_004589    | SCO1     | - | 10524373 | 10541610 |
| chr17 | NM_006923    | SDF2     | - | 23999733 | 24013060 |
| chr17 | NM_015670    | SENP3    | + | 7406042  | 7416011  |
| chr17 | NM_201566    | SLC16A13 | + | 6880117  | 6884164  |
| chr17 | NM_001165417 | SLC25A11 | - | 4781169  | 4784207  |
| chr17 | NM_001126121 | SLC25A19 | - | 70780655 | 70797125 |
| chr17 | NM_005827    | SLC35B1  | - | 45133688 | 45140281 |
| chr17 | NM_001098426 | SMARCD2  | - | 59263172 | 59274083 |
| chr17 | NM_003079    | SMARCE1  | - | 36037505 | 36057629 |
| chr17 | NM_144775    | SMCR8    | + | 18159318 | 18172095 |
| chr17 | NM_007241    | SNF8     | - | 44362457 | 44377153 |
| chr17 | NR_002576    | SNORA21  | - | 34262641 | 34262774 |
| chr17 | NR_002995    | SNORA76  | + | 59577430 | 59577563 |
| chr17 | NR_004380    | SNORD104 | + | 59577169 | 59577249 |
| chr17 | NR_004397    | SNORD1C  | + | 72066468 | 72066546 |
| chr17 | NR_000013    | SNORD42B | + | 24071694 | 24071761 |
| chr17 | NR_002744    | SNORD49A | + | 16284074 | 16284145 |
| chr17 | NR_003043    | SNORD49B | + | 16283547 | 16283595 |
| chr17 | NM_003110    | SP2      | + | 43328514 | 43361322 |
| chr17 | NM_006461    | SPAG5    | - | 23928709 | 23950183 |
| chr17 | NM_004890    | SPAG7    | - | 4803243  | 4811856  |
| chr17 | NM_014230    | SRP68    | - | 71546785 | 71580202 |
| chr17 | NM_001195427 | SRSF2    | - | 72241793 | 72245088 |
| chr17 | NM_001165937 | STARD3   | + | 35046858 | 35073980 |
| chr17 | NM_001003786 | STRADA   | - | 59133923 | 59173062 |
| chr17 | NM_178509    | STXBP4   | + | 50401124 | 50596448 |
| chr17 | NM_003168    | SUPT4H1  | - | 53777537 | 53784562 |
| chr17 | NM_003170    | SUPT6H   | + | 24013428 | 24053376 |
| chr17 | NM_016360    | TACO1    | + | 59031962 | 59039457 |
| chr17 | NM_003487    | TAF15    | + | 31160600 | 31198351 |
| chr17 | NM_014604    | TAX1BP3  | - | 3512937  | 3518722  |

|       |              |          |   |          |          |
|-------|--------------|----------|---|----------|----------|
| chr17 | NM_001201457 | TEX14    | - | 53989036 | 54124415 |
| chr17 | NM_005782    | THOC4    | - | 77439006 | 77442758 |
| chr17 | NM_013337    | TIMM22   | + | 847106   | 852140   |
| chr17 | NM_032376    | TMEM101  | - | 39444081 | 39447871 |
| chr17 | NM_017728    | TMEM104  | + | 70284216 | 70347517 |
| chr17 | NM_003876    | TMEM11   | - | 21041854 | 21058500 |
| chr17 | NM_152464    | TMEM199  | + | 23708813 | 23713216 |
| chr17 | NM_001014764 | TMEM93   | + | 3518838  | 3519711  |
| chr17 | NM_001076674 | TMUB2    | + | 39619879 | 39624625 |
| chr17 | NM_021137    | TNFAIP1  | + | 23686674 | 23698162 |
| chr17 | NM_004618    | TOP3A    | - | 18117959 | 18159046 |
| chr17 | NM_000546    | TP53     | - | 7512444  | 7531588  |
| chr17 | NM_001166621 | TRAPPC1  | - | 7774387  | 7776042  |
| chr17 | NM_001005207 | TRIM37   | - | 54414781 | 54539048 |
| chr17 | NM_207346    | TSEN54   | + | 71024203 | 71032415 |
| chr17 | NM_031421    | TTC25    | + | 37340413 | 37371194 |
| chr17 | NM_001193609 | TUBD1    | - | 55291621 | 55325088 |
| chr17 | NM_001070    | TUBG1    | + | 38014883 | 38020782 |
| chr17 | NM_016437    | TUBG2    | + | 38064791 | 38072550 |
| chr17 | NM_023079    | UBE2Z    | + | 44340729 | 44361421 |
| chr17 | NM_001080419 | UNK      | + | 71292275 | 71333481 |
| chr17 | NM_025090    | USP36    | - | 74304559 | 74348564 |
| chr17 | NM_016001    | UTP18    | + | 46692895 | 46730291 |
| chr17 | NM_032353    | VPS25    | + | 38178979 | 38185143 |
| chr17 | NM_001128159 | VPS53    | - | 358657   | 564846   |
| chr17 | NM_012478    | WBP2     | - | 71353374 | 71363096 |
| chr17 | NM_001143990 | WRAP53   | + | 7530113  | 7547545  |
| chr17 | NM_020899    | ZBTB4    | - | 7303408  | 7328292  |
| chr17 | NM_144680    | ZNF18    | - | 11821486 | 11841414 |
| chr17 | NM_001032293 | ZNF207   | + | 27701269 | 27721581 |
| chr17 | NM_032530    | ZNF594   | - | 5023554  | 5035902  |
| chr17 | NM_020787    | ZNF624   | - | 16464772 | 16497892 |
| chr17 | NM_004773    | ZNHIT3   | + | 31916585 | 31925775 |
| chr17 | NM_001042697 | ZSWIM7   | - | 15820599 | 15843731 |
| chr17 | NM_015113    | ZZEF1    | - | 3854487  | 3993002  |
| chr22 | NM_001098    | ACO2     | + | 40195074 | 40254939 |
| chr22 | NM_000026    | ADSL     | + | 39072449 | 39092521 |
| chr22 | NM_001142293 | ARFGAP3  | - | 41522475 | 41583352 |
| chr22 | NM_015367    | BCL2L13  | + | 16501484 | 16591989 |
| chr22 | NM_031444    | C22orf13 | - | 23266407 | 23281275 |
| chr22 | NM_032561    | C22orf23 | - | 36669478 | 36679549 |
| chr22 | NM_024627    | C22orf29 | - | 18213660 | 18222371 |
| chr22 | NM_207327    | C22orf40 | - | 45018573 | 45024857 |
| chr22 | NM_001201429 | CABIN1   | + | 22737764 | 22904596 |
| chr22 | NM_001002880 | CBY1     | + | 37382603 | 37399801 |
| chr22 | NM_173510    | CCDC117  | + | 27498661 | 27515283 |
| chr22 | NM_001017437 | CCDC157  | + | 29082626 | 29102818 |

|       |              |              |   |          |          |
|-------|--------------|--------------|---|----------|----------|
| chr22 | NM_001178010 | CDC45        | + | 17847413 | 17888135 |
| chr22 | NR_024482    | CECR4        | + | 16020278 | 16026335 |
| chr22 | NM_001005735 | CHEK2        | - | 27413730 | 27467822 |
| chr22 | NM_005198    | CHKB         | - | 49364252 | 49368294 |
| chr22 | NR_027928    | CHKB-CPT1B   | - | 49354155 | 49368294 |
| chr22 | NR_024009    | CN5H6.4      | - | 45069703 | 45071221 |
| chr22 | NM_005207    | CRKL         | + | 19601713 | 19638037 |
| chr22 | NR_033733    | CRYBB2P1     | + | 24174053 | 24187645 |
| chr22 | NM_022719    | DGCR14       | - | 17497791 | 17512190 |
| chr22 | NM_004147    | DRG1         | + | 30125538 | 30160172 |
| chr22 | NM_022785    | EFCAB6       | - | 42255956 | 42539550 |
| chr22 | NM_003753    | EIF3D        | - | 35236842 | 35255223 |
| chr22 | NM_016091    | EIF3L        | + | 36575315 | 36614584 |
| chr22 | NM_012179    | FBXO7        | + | 31200706 | 31224818 |
| chr22 | NR_027051    | FLJ39582     | + | 19686210 | 19694663 |
| chr22 | NM_001001560 | GGA1         | + | 36334426 | 36359517 |
| chr22 | NM_053004    | GNB1L        | - | 18155933 | 18222462 |
| chr22 | NM_016426    | GTSE1        | + | 45071301 | 45105371 |
| chr22 | NM_003325    | HIRA         | - | 17698223 | 17799219 |
| chr22 | NR_034118    | LOC100132273 | + | 40816882 | 40851298 |
| chr22 | NR_021492    | LOC100144603 | + | 49368320 | 49369221 |
| chr22 | NM_001013647 | LOC646851    | - | 37304070 | 37382580 |
| chr22 | NM_006767    | LZTR1        | + | 19666557 | 19683326 |
| chr22 | NM_014507    | MCAT         | - | 41858155 | 41869347 |
| chr22 | NM_001003891 | MED15        | + | 19191885 | 19271919 |
| chr22 | NR_037413    | MIR3619      | + | 44865587 | 44865670 |
| chr22 | NR_029479    | MIRLET7B     | + | 44888229 | 44888312 |
| chr22 | NM_003776    | MRPL40       | + | 17800035 | 17803596 |
| chr22 | NM_001003704 | MTFP1        | + | 29151719 | 29155041 |
| chr22 | NM_002490    | NDUFA6       | - | 40811475 | 40816834 |
| chr22 | NM_001003796 | NHP2L1       | - | 40399882 | 40414859 |
| chr22 | NM_024313    | NOL12        | + | 36412289 | 36419431 |
| chr22 | NM_007172    | NUP50        | + | 43938389 | 43962554 |
| chr22 | NM_001199319 | PEX26        | + | 16940685 | 16953797 |
| chr22 | NM_032758    | PHF5A        | - | 40185666 | 40194654 |
| chr22 | NM_058004    | PI4KA        | - | 19391978 | 19543070 |
| chr22 | NM_001001852 | PIM3         | + | 48740146 | 48743724 |
| chr22 | NM_012399    | PITPNB       | - | 26577656 | 26645255 |
| chr22 | NM_032311    | POLDIP3      | - | 41309670 | 41340906 |
| chr22 | NM_021974    | POLR2F       | + | 36679619 | 36695265 |
| chr22 | NM_001018050 | POLR3H       | - | 40251751 | 40270425 |
| chr22 | NM_015704    | PPPDE2       | - | 40323977 | 40347007 |
| chr22 | NM_002882    | RANBP1       | + | 18485023 | 18494704 |
| chr22 | NM_002883    | RANGAP1      | - | 39971560 | 40012162 |
| chr22 | NM_012265    | RHBDD3       | - | 27985843 | 27993914 |
| chr22 | NM_001135825 | RNF185       | + | 29886137 | 29933005 |
| chr22 | NR_029422    | RNU12        | + | 41341194 | 41341343 |

|       |              |           |   |          |          |
|-------|--------------|-----------|---|----------|----------|
| chr22 | NM_194326    | RPS19BP1  | - | 38255043 | 38258806 |
| chr22 | NM_015380    | SAMM50    | + | 42682593 | 42723745 |
| chr22 | NM_001005409 | SF3A1     | - | 29057976 | 29082913 |
| chr22 | NM_019008    | SMCR7L    | + | 38228229 | 38244083 |
| chr22 | NM_004782    | SNAP29    | + | 19543291 | 19575501 |
| chr22 | NR_002439    | SNORD43   | - | 38045002 | 38045064 |
| chr22 | NM_004175    | SNRPD3    | + | 23281617 | 23298509 |
| chr22 | NM_001145468 | SPECC1L   | + | 22996785 | 23143708 |
| chr22 | NM_001013694 | SRRD      | + | 25209849 | 25217904 |
| chr22 | NM_003932    | ST13      | - | 39550546 | 39582633 |
| chr22 | NM_153497    | TAB1      | + | 38125704 | 38163078 |
| chr22 | NM_001008697 | TFIP11    | - | 25217894 | 25238437 |
| chr22 | NM_001002877 | THOC5     | - | 28234155 | 28279736 |
| chr22 | NM_016272    | TOB2      | - | 40159437 | 40172973 |
| chr22 | NM_020243    | TOMM22    | + | 37407899 | 37410711 |
| chr22 | NM_003935    | TOP3B     | - | 20641402 | 20667147 |
| chr22 | NM_022727    | TRMT2A    | - | 18479397 | 18484768 |
| chr22 | NR_026963    | TTC28-AS1 | + | 26645363 | 26728667 |
| chr22 | NM_020461    | TUBGCP6   | - | 48998244 | 49025527 |
| chr22 | NM_012473    | TXN2      | - | 35193038 | 35207633 |
| chr22 | NM_001035247 | UFD1L     | - | 17817463 | 17846738 |
| chr22 | NM_001003684 | UQCR10    | + | 28493357 | 28496402 |
| chr22 | NM_022098    | XPNPEP3   | + | 39583039 | 39653826 |
| chr22 | NM_001469    | XRCC6     | + | 40347240 | 40389998 |
| chr22 | NM_001003692 | ZMAT5     | - | 28456944 | 28492969 |
| chr22 | NM_003426    | ZNF74     | + | 19078479 | 19092752 |
| chr18 | NM_001083625 | ANKRD12   | + | 9126757  | 9275206  |
| chr18 | NR_026849    | C18orf18  | - | 5226722  | 5228028  |
| chr18 | NM_001098801 | C18orf19  | - | 13653345 | 13716591 |
| chr18 | NM_001201474 | C18orf21  | + | 31806585 | 31813248 |
| chr18 | NM_001008239 | C18orf25  | + | 42007985 | 42100953 |
| chr18 | NM_001035005 | C18orf32  | - | 45261545 | 45267642 |
| chr18 | NM_014177    | C18orf55  | + | 69966725 | 69977184 |
| chr18 | NM_032142    | CEP192    | + | 12981360 | 13115051 |
| chr18 | NM_024899    | CEP76     | - | 12662630 | 12692703 |
| chr18 | NM_004715    | CTDP1     | + | 75540788 | 75615495 |
| chr18 | NM_018696    | ELAC1     | + | 46748384 | 46768488 |
| chr18 | NM_018255    | ELP2      | + | 31963884 | 32008605 |
| chr18 | NM_052911    | ESCO1     | - | 17363259 | 17434691 |
| chr18 | NM_001142958 | FBXO15    | - | 69891567 | 69966080 |
| chr18 | NM_032124    | HDHD2     | - | 42887778 | 42930869 |
| chr18 | NM_018439    | IMPACT    | + | 20260606 | 20287492 |
| chr18 | NM_001098817 | INO80C    | - | 31302288 | 31331953 |
| chr18 | NM_002035    | KDSR      | - | 59145950 | 59185486 |
| chr18 | NR_015389    | LOC339290 | + | 5228098  | 5236505  |
| chr18 | NM_002384    | MBD1      | - | 46049213 | 46062142 |
| chr18 | NM_022840    | METTL4    | - | 2527523  | 2561489  |

|       |              |          |   |           |           |
|-------|--------------|----------|---|-----------|-----------|
| chr18 | NR_031720    | MIR1539  | + | 45267740  | 45267790  |
| chr18 | NM_023075    | MPPE1    | - | 11873471  | 11898641  |
| chr18 | NM_033546    | MYL12B   | + | 3252110   | 3268282   |
| chr18 | NM_003826    | NAPG     | + | 10515872  | 10542766  |
| chr18 | NM_004539    | NARS     | - | 53418891  | 53440175  |
| chr18 | NM_006101    | NDC80    | + | 2561509   | 2606634   |
| chr18 | NM_021127    | PMAIP1   | + | 55718171  | 55722518  |
| chr18 | NM_007195    | POLI     | + | 50049846  | 50078602  |
| chr18 | NM_006788    | RALBP1   | + | 9465529   | 9528106   |
| chr18 | NM_003799    | RNMT     | + | 13716703  | 13754554  |
| chr18 | NR_033770    | ROCK1P1  | + | 99064     | 112222    |
| chr18 | NM_173630    | RTTN     | - | 65822020  | 66023942  |
| chr18 | NM_001039535 | SKA1     | + | 46155389  | 46174536  |
| chr18 | NM_012319    | SLC39A6  | - | 31942491  | 31963355  |
| chr18 | NM_005359    | SMAD4    | + | 46810580  | 46865409  |
| chr18 | NR_002571    | SNORD58A | - | 45271650  | 45271715  |
| chr18 | NR_002572    | SNORD58B | - | 45272031  | 45272097  |
| chr18 | NM_006938    | SNRPD1   | + | 17446257  | 17464206  |
| chr18 | NM_001007559 | SS18     | - | 21850214  | 21924609  |
| chr18 | NM_005131    | THOC1    | - | 204519    | 258059    |
| chr18 | NM_019022    | TMX3     | - | 64491904  | 64533333  |
| chr18 | NM_004786    | TXNL1    | - | 52421050  | 52456918  |
| chr18 | NM_006701    | TXNL4A   | - | 75833854  | 75849520  |
| chr18 | NM_004869    | VPS4B    | - | 59207404  | 59240732  |
| chr18 | NM_001143823 | ZFP161   | - | 5279017   | 5286039   |
| chr18 | NR_024565    | ZNF271   | + | 31124233  | 31144728  |
| chr2  | NM_018263    | ASXL2    | - | 25815756  | 25954816  |
| chr18 | NM_032347    | ZNF397   | + | 31074991  | 31092395  |
| chr2  | NM_001880    | ATF2     | - | 175647251 | 175741143 |
| chr2  | NM_001190266 | ATG16L1  | + | 233824955 | 233869059 |
| chr2  | NM_013325    | ATG4B    | + | 242225699 | 242261944 |
| chr2  | NM_001077198 | ATG9A    | - | 219792345 | 219802605 |
| chr18 | NM_001112734 | ZSCAN30  | - | 31085020  | 31124194  |
| chr15 | NM_024666    | AAGAB    | - | 65280420  | 65334128  |
| chr15 | NM_007011    | ABHD2    | + | 87432384  | 87546595  |
| chr15 | NM_001159280 | ADAL     | + | 41410163  | 41433388  |
| chr2  | NM_181575    | AUP1     | - | 74607282  | 74610482  |
| chr15 | NM_031284    | ADPGK    | - | 70830760  | 70863179  |
| chr2  | NM_152384    | BBS5     | + | 170044251 | 170071411 |
| chr15 | NM_007347    | AP4E1    | + | 48988237  | 49085389  |
| chr2  | NM_014670    | BZW1     | + | 201384891 | 201396805 |
| chr15 | NM_014691    | AQR      | - | 32935843  | 33049287  |
| chr2  | NM_144706    | C2orf15  | + | 99124616  | 99134360  |
| chr15 | NM_005744    | ARIH1    | + | 70553720  | 70665950  |
| chr15 | NM_006628    | ARPP19   | - | 50626723  | 50648505  |
| chr2  | NM_015680    | C2orf24  | - | 219744862 | 219749946 |
| chr15 | NM_198243    | ASB7     | + | 98960277  | 99009427  |



|       |              |            |   |           |           |
|-------|--------------|------------|---|-----------|-----------|
| chr15 | NM_080650    | ATPBD4     | - | 33450461  | 33625696  |
| chr2  | NM_017880    | C2orf42    | - | 70230520  | 70271655  |
| chr15 | NM_033028    | BBS4       | + | 70765578  | 70817870  |
| chr2  | NM_021925    | C2orf43    | - | 20748298  | 20886308  |
| chr2  | NM_024520    | C2orf47    | + | 200528284 | 200537092 |
| chr2  | NM_024093    | C2orf49    | + | 105320444 | 105328416 |
| chr2  | NR_024079    | C2orf52    | - | 232081380 | 232087294 |
| chr15 | NM_001142761 | C15orf23   | + | 38462213  | 38473781  |
| chr15 | NM_020154    | C15orf24   | - | 32163515  | 32181345  |
| chr2  | NM_001083946 | C2orf56    | + | 37312277  | 37329807  |
| chr2  | NM_001039693 | C2orf60    | - | 200501878 | 200528704 |
| chr15 | NM_152647    | C15orf33   | - | 47407883  | 47700410  |
| chr2  | NM_001135598 | C2orf63    | - | 55253187  | 55313203  |
| chr15 | NR_027262    | C15orf34   | + | 70455507  | 70458183  |
| chr2  | NM_001008215 | C2orf64    | - | 98582296  | 98591387  |
| chr15 | NM_001160116 | C15orf40   | - | 81448718  | 81471397  |
| chr2  | NM_001013649 | C2orf68    | - | 85685886  | 85692690  |
| chr15 | NM_001130010 | C15orf41   | + | 34659103  | 34889741  |
| chr2  | NM_153689    | C2orf69    | + | 200484223 | 200501241 |
| chr2  | NM_032319    | C2orf7     | - | 73308641  | 73313864  |
| chr15 | NM_030800    | C15orf44   | - | 63658170  | 63690460  |
| chr2  | NM_001143960 | C2orf74    | + | 61225746  | 61245468  |
| chr2  | NM_001017927 | C2orf76    | - | 119776489 | 119840728 |
| chr2  | NM_001085447 | C2orf77    | - | 170210180 | 170259177 |
| chr2  | NM_001013663 | C2orf79    | - | 24866639  | 24869755  |
| chr15 | NM_001143936 | C15orf61   | + | 65600575  | 65606695  |
| chr15 | NM_138423    | CASC4      | + | 42368200  | 42495251  |
| chr15 | NM_144508    | CASC5      | + | 38673738  | 38742173  |
| chr2  | NM_001743    | CALM2      | - | 47240724  | 47257244  |
| chr15 | NR_002318    | CATSPER2P1 | - | 41815433  | 41825788  |
| chr2  | NM_023083    | CAPN10     | + | 241174805 | 241187199 |
| chr2  | NM_032357    | CCDC115    | - | 130812285 | 130816392 |
| chr2  | NM_024584    | CCDC121    | - | 27702009  | 27705402  |
| chr15 | NM_007236    | CHP        | + | 39310728  | 39361375  |
| chr2  | NM_032779    | CCDC142    | - | 74553466  | 74563865  |
| chr2  | NM_001080539 | CCDC150    | + | 197212600 | 197305775 |
| chr2  | NM_174931    | CCDC75     | + | 37165097  | 37177242  |
| chr2  | NM_019044    | CCDC93     | - | 118389523 | 118488209 |
| chr2  | NM_001241    | CCNT2      | + | 135392861 | 135433385 |
| chr2  | NM_006430    | CCT4       | - | 61948765  | 61969295  |
| chr15 | NM_006660    | CLPX       | - | 63229836  | 63264616  |
| chr2  | NM_001009570 | CCT7       | + | 73314871  | 73333658  |
| chr15 | NM_001143887 | COPS2      | - | 47204762  | 47235146  |
| chr2  | NM_005760    | CEBPZ      | - | 37282278  | 37312244  |
| chr2  | NM_001809    | CENPA      | + | 26862385  | 26870959  |
| chr2  | NM_001199803 | CENPO      | + | 24869678  | 24898749  |
| chr15 | NM_016396    | CTDSPL2    | + | 42506870  | 42606721  |

|       |              |          |   |           |           |
|-------|--------------|----------|---|-----------|-----------|
| chr2  | NM_001008708 | CHAC2    | + | 53848432  | 53855791  |
| chr2  | NM_032309    | CHCHD5   | + | 113058506 | 113063088 |
| chr15 | NM_001144823 | DENND4A  | - | 63740010  | 63871685  |
| chr2  | NM_004804    | CIAO1    | + | 96295610  | 96303627  |
| chr2  | NM_004882    | CIR1     | - | 174921123 | 174968689 |
| chr15 | NM_018163    | DNAJC17  | - | 38847358  | 38886968  |
| chr2  | NM_024692    | CLIP4    | + | 29191811  | 29260183  |
| chr2  | NM_004071    | CLK1     | - | 201425976 | 201437712 |
| chr15 | NM_017743    | DPP8     | - | 63525050  | 63597088  |
| chr15 | NM_001144955 | DTWD1    | + | 47700517  | 47724625  |
| chr15 | NM_001025248 | DUT      | + | 46410912  | 46422862  |
| chr15 | NM_001142443 | EDC3     | - | 72709951  | 72775439  |
| chr15 | NM_014335    | EID1     | + | 46957581  | 46959672  |
| chr15 | NM_001013703 | EIF2AK4  | + | 38013638  | 38115089  |
| chr2  | NM_022730    | COPS7B   | + | 232359405 | 232381678 |
| chr15 | NM_152596    | EXD1     | - | 39262222  | 39310187  |
| chr2  | NM_025147    | COQ10B   | + | 198026475 | 198048096 |
| chr2  | NM_001862    | COX5B    | + | 97628952  | 97631089  |
| chr15 | NM_031452    | FAM103A1 | + | 81445998  | 81450427  |
| chr2  | NM_004718    | COX7A2L  | - | 42431147  | 42441860  |
| chr2  | NM_016207    | CPSF3    | + | 9481318   | 9530678   |
| chr2  | NM_004379    | CREB1    | + | 208102860 | 208178529 |
| chr2  | NM_014171    | CRIP1    | + | 46697828  | 46706385  |
| chr15 | NM_001014812 | FAM96A   | - | 62151813  | 62173260  |
| chr15 | NM_173611    | FAM98B   | + | 36533619  | 36564355  |
| chr15 | NM_014967    | FAN1     | + | 28983367  | 29022602  |
| chr15 | NM_001113378 | FANCI    | + | 87588197  | 87661366  |
| chr2  | NM_021198    | CTDSP1   | + | 218972721 | 218978908 |
| chr15 | NM_147188    | FBXO22   | + | 73983254  | 74014663  |
| chr2  | NM_020943    | CWC22    | - | 180517848 | 180580025 |
| chr15 | NR_026891    | FLJ10038 | - | 48428424  | 48434368  |
| chr15 | NM_005254    | GABPB1   | - | 48356680  | 48434897  |
| chr2  | NM_001349    | DARS     | - | 136380723 | 136459692 |
| chr2  | NM_001079862 | DBI      | + | 119840973 | 119846592 |
| chr15 | NM_001001556 | GALK2    | + | 47235267  | 47409294  |
| chr2  | NM_001164821 | DCAF17   | + | 171999006 | 172049808 |
| chr15 | NM_198141    | GANC     | + | 40353657  | 40433156  |
| chr2  | NM_004939    | DDX1     | + | 15649220  | 15688676  |
| chr2  | NR_024004    | DDX11L2  | - | 114073074 | 114077764 |
| chr2  | NM_006773    | DDX18    | + | 118288724 | 118306423 |
| chr2  | NM_001042702 | DFNB59   | + | 179024408 | 179034356 |
| chr15 | NR_027410    | GOLGA8B  | - | 32604775  | 32663063  |
| chr2  | NM_018981    | DNAJC10  | + | 183289243 | 183351500 |
| chr2  | NM_001198559 | DNAJC27  | - | 25020008  | 25048467  |
| chr15 | NM_001018102 | GRINL1A  | + | 55786192  | 55797045  |
| chr2  | NM_001165031 | DTYMK    | - | 242263829 | 242275056 |
| chr2  | NM_003584    | DUSP11   | - | 73842832  | 73860792  |

|       |              |              |   |           |           |
|-------|--------------|--------------|---|-----------|-----------|
| chr2  | NM_001378    | DYNC112      | + | 172252227 | 172313165 |
| chr2  | NM_198256    | E2F6         | - | 11501951  | 11523748  |
| chr15 | NM_000520    | HEXA         | - | 70422831  | 70455574  |
| chr15 | NR_002780    | HIGD2B       | - | 70755175  | 70765543  |
| chr2  | NM_004836    | EIF2AK3      | - | 88637373  | 88708209  |
| chr2  | NM_001034116 | EIF2B4       | - | 27440722  | 27446828  |
| chr15 | NM_017553    | INO80        | - | 39058370  | 39195632  |
| chr2  | NM_004846    | EIF4E2       | + | 233123600 | 233142164 |
| chr2  | NM_015904    | EIF5B        | + | 99320265  | 99383160  |
| chr15 | NM_001031715 | IQCH         | + | 65334191  | 65581196  |
| chr2  | NM_001135021 | ELMOD3       | + | 85435353  | 85472386  |
| chr15 | NM_004136    | IREB2        | + | 76517572  | 76580853  |
| chr2  | NM_033505    | EPT1         | + | 26422457  | 26472263  |
| chr2  | NM_001127397 | ERLEC1       | + | 53867571  | 53899999  |
| chr15 | NM_014793    | LCMT2        | - | 41407265  | 41410112  |
| chr2  | NM_173822    | FAM126B      | - | 201546685 | 201644637 |
| chr15 | NM_001040616 | LINS         | - | 98926951  | 98959968  |
| chr2  | NM_024293    | FAM134A      | + | 219751182 | 219758441 |
| chr15 | NR_036507    | LOC100306975 | + | 47235786  | 47238114  |
| chr2  | NM_015475    | FAM98A       | - | 33662232  | 33677866  |
| chr2  | NM_005687    | FARSB        | - | 223144405 | 223229071 |
| chr2  | NM_024622    | FASTKD1      | - | 170094508 | 170138670 |
| chr2  | NM_001136193 | FASTKD2      | + | 207338356 | 207369156 |
| chr2  | NM_174899    | FBXO36       | + | 230495450 | 230586069 |
| chr2  | NM_001024680 | FBXO48       | - | 68543008  | 68547894  |
| chr2  | NR_033980    | FLJ16341     | - | 60928398  | 60961953  |
| chr15 | NM_001199017 | LRRRC49      | + | 68971981  | 69129490  |
| chr15 | NM_006715    | MAN2C1       | - | 73435185  | 73447994  |
| chr15 | NM_001128608 | MAPKBP1      | + | 39853923  | 39907345  |
| chr2  | NM_181453    | GCC2         | + | 108432008 | 108492286 |
| chr2  | NM_002056    | GFPT1        | - | 69400408  | 69467886  |
| chr15 | NM_005926    | MFAP1        | - | 41884024  | 41904243  |
| chr2  | NM_000821    | GGCX         | - | 85629703  | 85642168  |
| chr2  | NM_024506    | GLB1L        | - | 219809746 | 219818375 |
| chr2  | NM_178439    | GMCL1        | + | 69910321  | 69960231  |
| chr2  | NM_013335    | GMPPA        | + | 220071830 | 220079962 |
| chr2  | NM_001201428 | GORASP2      | + | 171493193 | 171531889 |
| chr15 | NR_036136    | MIR3175      | + | 91248632  | 91248709  |
| chr2  | NM_001035521 | GTF3C2       | - | 27402224  | 27433372  |
| chr2  | NM_012086    | GTF3C3       | - | 197337344 | 197372670 |
| chr15 | NM_022163    | MRPL46       | - | 86803712  | 86811637  |
| chr15 | NM_022839    | MRPS11       | + | 86811687  | 86822865  |
| chr2  | NM_000182    | HADHA        | - | 26267007  | 26321098  |
| chr2  | NM_000183    | HADHB        | + | 26321119  | 26366837  |
| chr15 | NM_017762    | MTMR10       | - | 29018435  | 29071099  |
| chr2  | NM_019024    | HEATR5B      | - | 37061656  | 37164989  |
| chr15 | NM_138704    | NDNL2        | - | 27347649  | 27349309  |

|       |              |              |   |           |           |
|-------|--------------|--------------|---|-----------|-----------|
| chr15 | NM_016013    | NDUFAF1      | - | 39466842  | 39481934  |
| chr15 | NM_001033088 | NGRN         | + | 88609898  | 88616447  |
| chr15 | NM_001008860 | NIPA2        | - | 20556124  | 20585868  |
| chr15 | NM_018648    | NOP10        | - | 32421208  | 32422654  |
| chr2  | NM_199440    | HSPD1        | - | 198059552 | 198073243 |
| chr15 | NM_001129897 | NUSAP1       | + | 39412217  | 39460540  |
| chr2  | NM_002157    | HSPE1        | + | 198072965 | 198076432 |
| chr2  | NM_001202485 | HSPE1-MOBKL3 | + | 198072965 | 198126668 |
| chr2  | NM_013247    | HTRA2        | + | 74610039  | 74614191  |
| chr15 | NM_007280    | OIP5         | - | 39388757  | 39412111  |
| chr2  | NM_001039613 | IAH1         | + | 9532120   | 9546042   |
| chr2  | NM_015662    | IFT172       | - | 27520743  | 27566075  |
| chr15 | NM_005707    | PDCD7        | - | 63196769  | 63213227  |
| chr15 | NM_152595    | PGBD4        | + | 32181565  | 32183883  |
| chr2  | NM_030768    | ILKAP        | - | 238743781 | 238777063 |
| chr2  | NM_001100169 | IMMT         | - | 86224565  | 86276404  |
| chr2  | NM_033416    | IMP4         | + | 130816958 | 130820667 |
| chr2  | NM_032329    | ING5         | + | 242290128 | 242317569 |
| chr2  | NM_031288    | INO80B       | + | 74535706  | 74538595  |
| chr15 | NM_012388    | PLDN         | + | 43666708  | 43689201  |
| chr2  | NM_016133    | INSIG2       | + | 118562519 | 118584067 |
| chr15 | NM_001126131 | POLG         | - | 87660539  | 87679030  |
| chr2  | NM_001145000 | ITGAV        | + | 187163034 | 187253873 |
| chr15 | NM_000942    | PPIB         | - | 62235066  | 62242407  |
| chr2  | NM_004763    | ITGB1BP1     | - | 9463265   | 9481094   |
| chr15 | NM_003981    | PRC1         | - | 89310271  | 89338808  |
| chr15 | NM_001102667 | PSMA4        | + | 76619801  | 76628618  |
| chr2  | NM_017969    | IWS1         | - | 127954852 | 128000557 |
| chr15 | NM_004663    | RAB11A       | + | 63948849  | 63968846  |
| chr15 | NM_001164270 | RAD51        | + | 38774618  | 38811648  |
| chr2  | NM_018433    | KDM3A        | + | 86521781  | 86573350  |
| chr2  | NM_001115016 | KIAA1310     | - | 96622633  | 96667842  |
| chr15 | NM_015920    | RPS27L       | - | 61232591  | 61236794  |
| chr2  | NM_016618    | KRCC1        | - | 88107838  | 88136363  |
| chr15 | NM_152260    | RPUSD2       | + | 38648828  | 38653953  |
| chr15 | NM_016304    | RSL24D1      | - | 53260803  | 53276523  |
| chr2  | NM_014713    | LAPTM4A      | - | 20095891  | 20115270  |
| chr15 | NR_003654    | SCAND2       | + | 82975694  | 82986698  |
| chr15 | NM_001193489 | SECISBP2L    | - | 47068127  | 47126052  |
| chr2  | NM_015929    | LIPT1        | + | 99137849  | 99146045  |
| chr2  | NR_036549    | LOC100129961 | - | 135340672 | 135392646 |
| chr15 | NM_001033517 | SERINC4      | - | 41874456  | 41879547  |
| chr15 | NM_138356    | SHF          | - | 43246703  | 43280665  |
| chr15 | NM_001013843 | SLTM         | - | 56958535  | 57013144  |
| chr2  | NR_026922    | LOC150776    | + | 131966855 | 131995619 |
| chr15 | NM_003825    | SNAP23       | + | 40575126  | 40612548  |
| chr15 | NM_006049    | SNAPC5       | - | 64569719  | 64577200  |

|       |              |           |   |           |           |
|-------|--------------|-----------|---|-----------|-----------|
| chr2  | NR_036496    | LOC339803 | - | 61222233  | 61225614  |
| chr2  | NR_033872    | LOC400960 | - | 70042898  | 70167651  |
| chr2  | NR_027238    | LOC654342 | - | 91188435  | 91211702  |
| chr2  | NR_034113    | LOC729723 | + | 25048484  | 25116069  |
| chr2  | NM_133259    | LRPPRC    | - | 43966866  | 44076648  |
| chr15 | NR_002440    | SNORD16   | - | 64582202  | 64582302  |
| chr15 | NR_002441    | SNORD18A  | - | 64582636  | 64582706  |
| chr15 | NM_003090    | SNRPA1    | - | 99639237  | 99652983  |
| chr2  | NM_005911    | MAT2A     | + | 85619798  | 85625914  |
| chr2  | NM_032601    | MCEE      | - | 71190313  | 71210902  |
| chr15 | NM_024063    | SPATA5L1  | + | 43481810  | 43500908  |
| chr2  | NM_005917    | MDH1      | + | 63669246  | 63687834  |
| chr2  | NM_001039845 | MDH1B     | - | 207310733 | 207338295 |
| chr15 | NM_001160227 | SPG11     | - | 42642185  | 42743168  |
| chr2  | NM_001137602 | MEMO1     | - | 31946397  | 32089202  |
| chr2  | NM_014168    | METTL5    | - | 170376513 | 170389599 |
| chr15 | NM_003134    | SRP14     | - | 38115182  | 38118681  |
| chr2  | NM_032718    | MFSD9     | - | 102700097 | 102719769 |
| chr15 | NM_020147    | THAP10    | - | 68960734  | 68971826  |
| chr15 | NM_025141    | TM2D3     | - | 99999571  | 100010117 |
| chr15 | NM_007364    | TMED3     | + | 77390545  | 77402244  |
| chr15 | NM_016454    | TMEM85    | + | 32304536  | 32309644  |
| chr15 | NM_015497    | TMEM87A   | - | 40290017  | 40353047  |
| chr15 | NM_016213    | TRIP4     | + | 62467055  | 62534555  |
| chr15 | NM_017672    | TRPM7     | - | 48636643  | 48766304  |
| chr15 | NM_173500    | TTBK2     | - | 40823835  | 41000299  |
| chr2  | NR_031608    | MIR663B   | - | 132731008 | 132731123 |
| chr2  | NR_030630    | MIR933    | - | 175740606 | 175740683 |
| chr2  | NM_138798    | MITD1     | - | 99152157  | 99163924  |
| chr15 | NM_201265    | UBL7      | - | 72525370  | 72540582  |
| chr2  | NM_015702    | MMADHC    | - | 150134392 | 150152576 |
| chr15 | NM_001039675 | UNC45A    | + | 89274413  | 89298327  |
| chr15 | NM_006537    | USP3      | + | 61583862  | 61670716  |
| chr2  | NM_001145450 | MORN2     | + | 38956606  | 38963354  |
| chr2  | NM_005791    | MPHOSPH10 | + | 71210951  | 71230740  |
| chr15 | NM_001128610 | USP8      | + | 48503870  | 48580569  |
| chr2  | NM_002437    | MPV17     | - | 27385863  | 27399473  |
| chr15 | NM_020857    | VPS18     | + | 38973919  | 38983465  |
| chr15 | NM_018668    | VPS33B    | - | 89342777  | 89366837  |
| chr2  | NM_014763    | MRPL19    | + | 75727416  | 75742842  |
| chr15 | NM_015289    | VPS39     | - | 40238190  | 40287794  |
| chr2  | NM_145212    | MRPL30    | + | 99164009  | 99180521  |
| chr2  | NM_004891    | MRPL33    | + | 27848087  | 27856112  |
| chr15 | NM_025234    | WDR61     | - | 76362632  | 76378995  |
| chr2  | NM_022915    | MRPL44    | + | 224530364 | 224540675 |
| chr15 | NM_032856    | WDR73     | - | 82987014  | 82998525  |
| chr15 | NM_001077268 | ZFYVE19   | + | 38886565  | 38894059  |

|       |              |          |   |           |           |
|-------|--------------|----------|---|-----------|-----------|
| chr15 | NM_001002843 | ZNF280D  | - | 54709665  | 54813079  |
| chr2  | NR_028049    | MTERFD2  | - | 241675181 | 241690420 |
| chr2  | NM_006636    | MTHFD2   | + | 74279197  | 74295932  |
| chr2  | NM_002453    | MTIF2    | - | 55317259  | 55349888  |
| chr15 | NM_014106    | ZNF770   | - | 33057833  | 33067789  |
| chr15 | NM_017975    | ZWILCH   | + | 64584484  | 64628876  |
| chr16 | NR_003574    | ABCA17P  | + | 2330923   | 2416701   |
| chr2  | NM_001085365 | MZT2A    | - | 131958002 | 131966534 |
| chr16 | NM_001089    | ABCA3    | - | 2265879   | 2330748   |
| chr2  | NM_025029    | MZT2B    | + | 130655970 | 130664770 |
| chr2  | NM_017567    | NAGK     | + | 71148915  | 71159506  |
| chr16 | NR_003228    | AFG3L1P  | + | 88566488  | 88594696  |
| chr2  | NM_002491    | NDUFB3   | + | 201644706 | 201658718 |
| chr16 | NM_001012398 | AKTIP    | - | 52082692  | 52094671  |
| chr2  | NM_001199981 | NDUFS1   | - | 206696047 | 206732488 |
| chr16 | NM_019109    | ALG1     | + | 5061810   | 5077381   |
| chr2  | NM_001002755 | NFU1     | - | 69476756  | 69518257  |
| chr16 | NM_133450    | ANKS3    | - | 4686513   | 4724164   |
| chr2  | NM_001136039 | NIF3L1   | + | 201462294 | 201476900 |
| chr16 | NM_012106    | ARL2BP   | + | 55836538  | 55845046  |
| chr16 | NM_015161    | ARL6IP1  | - | 18710491  | 18720358  |
| chr16 | NM_001105247 | ARMC5    | + | 31377817  | 31385989  |
| chr2  | NM_006186    | NR4A2    | - | 156889189 | 156897533 |
| chr16 | NM_004691    | ATP6VOD1 | - | 66029417  | 66072590  |
| chr16 | NM_007245    | ATXN2L   | + | 28741914  | 28756059  |
| chr2  | NM_138285    | NUP35    | + | 183697327 | 183734653 |
| chr16 | NM_001173539 | BANP     | + | 86542538  | 86668425  |
| chr16 | NM_031885    | BBS2     | - | 55075759  | 55111509  |
| chr2  | NR_024415    | OBFC2A   | + | 192251042 | 192261493 |
| chr2  | NM_001128150 | ORMDL1   | - | 190343237 | 190357342 |
| chr2  | NM_022353    | OSGEPL1  | - | 190319630 | 190336169 |
| chr16 | NM_001040160 | C16orf13 | - | 624429    | 626348    |
| chr16 | NM_001001410 | C16orf42 | - | 1339241   | 1341874   |
| chr16 | NM_001100873 | C16orf46 | - | 79644602  | 79668373  |
| chr16 | NM_024516    | C16orf53 | + | 29735028  | 29741317  |
| chr16 | NM_153025    | C16orf55 | + | 88251710  | 88265176  |
| chr16 | NM_022744    | C16orf58 | - | 31408313  | 31427207  |
| chr16 | NM_020188    | C16orf61 | - | 79567199  | 79598003  |
| chr16 | NM_144600    | C16orf63 | - | 15867077  | 15889948  |
| chr16 | NM_024109    | C16orf68 | + | 8623027   | 8647580   |
| chr16 | NM_004913    | C16orf7  | - | 88301041  | 88314895  |
| chr16 | NM_025187    | C16orf70 | + | 65701415  | 65739943  |
| chr2  | NM_024065    | PDCL3    | + | 100545849 | 100559633 |
| chr16 | NM_139170    | C16orf71 | + | 4724289   | 4739398   |
| chr2  | NM_002601    | PDE6D    | - | 232305390 | 232354218 |
| chr16 | NM_013242    | C16orf80 | - | 56704997  | 56720797  |
| chr2  | NM_022817    | PER2     | - | 238817417 | 238861946 |

|       |              |          |   |           |           |
|-------|--------------|----------|---|-----------|-----------|
| chr2  | NM_002618    | PEX13    | + | 61098315  | 61132629  |
| chr2  | NM_024989    | PGAP1    | - | 197405972 | 197499699 |
| chr2  | NM_001008489 | PHOSPHO2 | + | 170259209 | 170266465 |
| chr16 | NM_001012991 | C16orf88 | - | 19625174  | 19636993  |
| chr2  | NM_002643    | PIGF     | - | 46661916  | 46697755  |
| chr2  | NM_015040    | PIKFYVE  | + | 208839235 | 208931720 |
| chr16 | NM_001014979 | C16orf93 | - | 30676244  | 30681066  |
| chr16 | NM_001755    | CBFB     | + | 65620550  | 65692459  |
| chr2  | NM_001080475 | PLEKHM3  | - | 208394256 | 208598529 |
| chr2  | NM_000534    | PMS1     | + | 190357055 | 190450600 |
| chr2  | NM_015488    | PNKD     | + | 218843358 | 218919760 |
| chr2  | NM_020143    | PNO1     | + | 68238508  | 68256595  |
| chr2  | NM_019896    | POLE4    | + | 75039282  | 75050367  |
| chr2  | NM_015425    | POLR1A   | - | 86106961  | 86186789  |
| chr2  | NM_001137604 | POLR1B   | + | 113015962 | 113051198 |
| chr16 | NM_006110    | CD2BP2   | - | 30269587  | 30274183  |
| chr2  | NM_004792    | PPIG     | + | 170149095 | 170202500 |
| chr2  | NM_032472    | PPIL3    | - | 201443923 | 201462094 |
| chr16 | NM_006319    | CDIPT    | - | 29777178  | 29782079  |
| chr2  | NM_177983    | PPM1G    | - | 27457564  | 27486000  |
| chr2  | NM_206876    | PPP1CB   | + | 28828117  | 28879310  |
| chr16 | NM_030928    | CDT1     | + | 87397686  | 87403167  |
| chr2  | NM_002712    | PPP1R7   | + | 241738574 | 241771112 |
| chr16 | NM_145039    | CENPBD1  | - | 88563683  | 88566741  |
| chr2  | NM_013388    | PREB     | - | 27207128  | 27211046  |
| chr16 | NM_025082    | CENPT    | - | 66419560  | 66438862  |
| chr2  | NM_001171603 | PREPL    | - | 44398251  | 44442505  |
| chr16 | NM_003869    | CES2     | + | 65525847  | 65536495  |
| chr2  | NM_003690    | PRKRA    | - | 179004386 | 179024204 |
| chr16 | NM_006324    | CFDP1    | - | 73885108  | 74024888  |
| chr2  | NM_017892    | PRPF40A  | - | 153216352 | 153282221 |
| chr16 | NM_001083314 | CHMP1A   | - | 88238344  | 88251630  |
| chr2  | NM_001191037 | PSMD1    | + | 231629821 | 231745784 |
| chr2  | NM_017952    | PTCD3    | + | 86186815  | 86222791  |
| chr2  | NM_001099285 | PTMA     | + | 232281478 | 232286494 |
| chr16 | NM_020313    | CIAPIN1  | - | 56019587  | 56038870  |
| chr16 | NM_001040138 | CKLF     | + | 65143966  | 65157655  |
| chr16 | NM_001114331 | CLCN7    | - | 1434935   | 1465086   |
| chr16 | NM_015041    | CLUAP1   | + | 3490963   | 3526586   |
| chr2  | NM_006267    | RANBP2   | + | 108702368 | 108768699 |
| chr16 | NM_001195139 | COG4     | - | 69071972  | 69114958  |
| chr2  | NM_022128    | RBKS     | - | 27857769  | 27966727  |
| chr16 | NM_153603    | COG7     | - | 23307314  | 23372013  |
| chr16 | NM_032382    | COG8     | - | 67920024  | 67931027  |
| chr2  | NM_152945    | RBM45    | + | 178685427 | 178702628 |
| chr16 | NM_020312    | COQ9     | + | 56038837  | 56052688  |
| chr2  | NM_020905    | RDH14    | - | 18599469  | 18605440  |

|       |              |          |   |           |           |
|-------|--------------|----------|---|-----------|-----------|
| chr16 | NM_001142288 | COX4NB   | - | 84369731  | 84390649  |
| chr2  | NM_017750    | RETSAT   | - | 85422588  | 85435332  |
| chr2  | NM_001167608 | RHBDD1   | + | 227408914 | 227572167 |
| chr16 | NM_001012759 | CTU2     | + | 87300391  | 87309287  |
| chr16 | NM_030579    | CYB5B    | + | 68015998  | 68057668  |
| chr2  | NM_002936    | RNASEH1  | - | 3570565   | 3583815   |
| chr16 | NM_001178029 | DCI      | - | 2229873   | 2241603   |
| chr16 | NM_001199743 | DCTN5    | + | 23560187  | 23592569  |
| chr2  | NM_173647    | RNF149   | - | 101258494 | 101291610 |
| chr16 | NM_173475    | DCUN1D3  | - | 20776896  | 20819062  |
| chr2  | NM_016494    | RNF181   | + | 85676347  | 85678342  |
| chr16 | NM_018332    | DDX19A   | + | 68938324  | 68964782  |
| chr2  | NM_022453    | RNF25    | - | 219236830 | 219245025 |
| chr2  | NR_023343    | RNU4ATAC | + | 122004925 | 122005055 |
| chr2  | NM_144563    | RPIA     | + | 88772290  | 88831567  |
| chr16 | NM_014003    | DHX38    | + | 70685115  | 70704312  |
| chr16 | NM_005880    | DNAJA2   | - | 45546774  | 45565126  |
| chr16 | NM_001135110 | DNAJA3   | + | 4415858   | 4446776   |
| chr2  | NM_001011    | RPS7     | + | 3600727   | 3606384   |
| chr2  | NM_005444    | RQCD1    | + | 219141921 | 219167243 |
| chr2  | NM_001015055 | RTKN     | - | 74506495  | 74522568  |
| chr16 | NM_017803    | DUS2L    | + | 66614704  | 66670685  |
| chr16 | NM_130897    | DYNLRB2  | + | 79132354  | 79142042  |
| chr16 | NM_001950    | E2F4     | + | 65783568  | 65790322  |
| chr16 | NM_001083614 | EARS2    | - | 23440834  | 23476197  |
| chr16 | NM_014329    | EDC4     | + | 66464499  | 66475907  |
| chr2  | NM_016510    | SCLY     | + | 238634370 | 238672793 |
| chr16 | NM_013302    | EEF2K    | + | 22125092  | 22207567  |
| chr16 | NM_001010865 | EME2     | + | 1763229   | 1766240   |
| chr2  | NM_001193528 | SCRN3    | + | 174968702 | 175002549 |
| chr16 | NM_005236    | ERCC4    | + | 13921514  | 13953706  |
| chr16 | NM_080663    | ERI2     | - | 20699015  | 20725296  |
| chr16 | NM_024939    | ESRP2    | - | 66819950  | 66827637  |
| chr16 | NM_058219    | EXOSC6   | - | 68841634  | 68843334  |
| chr16 | NM_001018104 | FAHD1    | + | 1817225   | 1830204   |
| chr16 | NM_145253    | FAM100A  | - | 4598884   | 4604928   |
| chr2  | NM_012433    | SF3B1    | - | 197964942 | 198008016 |
| chr16 | NM_023933    | FAM173A  | + | 711158    | 712591    |
| chr2  | NM_016047    | SF3B14   | - | 24143957  | 24152818  |
| chr2  | NM_001160033 | SGOL2    | + | 201099109 | 201157063 |
| chr16 | NM_016062    | FAM96B   | - | 65523458  | 65525821  |
| chr16 | NM_018378    | FBXL8    | + | 65751391  | 65755578  |
| chr16 | NR_024568    | FBXO31   | - | 85920442  | 85983209  |
| chr16 | NR_026674    | FLJ30679 | + | 85146426  | 85148406  |
| chr2  | NM_001193513 | SLC30A6  | + | 32244413  | 32302685  |
| chr2  | NM_025181    | SLC35F5  | - | 114188402 | 114230870 |
| chr16 | NM_032296    | FLYWCH1  | + | 2901980   | 2941210   |



|       |              |              |   |           |           |
|-------|--------------|--------------|---|-----------|-----------|
| chr2  | NM_001127257 | SLC39A10     | + | 196229776 | 196310671 |
| chr2  | NM_018158    | SLC4A1AP     | + | 27739841  | 27771351  |
| chr16 | NM_001170634 | FUS          | + | 31098931  | 31113693  |
| chr2  | NM_021095    | SLC5A6       | - | 27275958  | 27288679  |
| chr16 | NM_000512    | GALNS        | - | 87407642  | 87450875  |
| chr2  | NM_001142286 | SMC6         | - | 17708559  | 17798577  |
| chr2  | NM_001122964 | SMEK2        | - | 55629017  | 55698300  |
| chr16 | NM_030819    | GFOD2        | - | 66265936  | 66310774  |
| chr16 | NM_032520    | GNPTG        | + | 1341900   | 1353353   |
| chr16 | NM_002080    | GOT2         | - | 57298535  | 57325747  |
| chr16 | NM_001520    | GTF3C1       | - | 27379434  | 27468752  |
| chr2  | NM_014014    | SNRNP200     | - | 96303800  | 96335024  |
| chr16 | NM_001040427 | HAGH         | - | 1799104   | 1817196   |
| chr2  | NM_006857    | SNRNP27      | + | 69974593  | 69985853  |
| chr2  | NM_003096    | SNRPG        | - | 70362009  | 70374373  |
| chr2  | NM_014748    | SNX17        | + | 27446892  | 27453498  |
| chr16 | NM_003609    | HIRIP3       | - | 29911812  | 29914913  |
| chr2  | NM_014946    | SPAST        | + | 32142183  | 32236210  |
| chr2  | NM_003142    | SSB          | + | 170363634 | 170376821 |
| chr2  | NM_005843    | STAM2        | - | 152681560 | 152740752 |
| chr16 | NM_173618    | INO80E       | + | 29915031  | 29924613  |
| chr2  | NM_020151    | STARD7       | - | 96214329  | 96238300  |
| chr2  | NM_052902    | STK11IP      | + | 220170839 | 220189417 |
| chr2  | NM_001008910 | STK16        | + | 219818435 | 219823303 |
| chr2  | NM_006374    | STK25        | - | 242083104 | 242096707 |
| chr2  | NM_015690    | STK36        | + | 219245005 | 219275684 |
| chr16 | NM_024773    | JMJD5        | + | 27122307  | 27140590  |
| chr2  | NM_018571    | STRADB       | + | 202024636 | 202053819 |
| chr16 | NM_001130089 | KARS         | - | 74219122  | 74239086  |
| chr2  | NM_003849    | SUCLG1       | - | 84504157  | 84540097  |
| chr16 | NM_005886    | KATNB1       | + | 56327160  | 56348663  |
| chr16 | NM_178863    | KCTD13       | - | 29825161  | 29845046  |
| chr16 | NM_018992    | KCTD5        | + | 2672495   | 2699032   |
| chr16 | NM_014761    | KIAA0174     | + | 70486946  | 70520407  |
| chr2  | NM_001005781 | SUMO1        | - | 202779147 | 202811567 |
| chr2  | NM_014860    | SUPT7L       | - | 27727182  | 27739953  |
| chr2  | NM_005680    | TAF1B        | + | 9901021   | 9991996   |
| chr16 | NM_015202    | KIAA0556     | + | 27468968  | 27699193  |
| chr16 | NM_001184854 | KLHDC4       | - | 86298918  | 86357099  |
| chr16 | NR_027275    | LOC100128788 | - | 2727077   | 2742602   |
| chr2  | NM_006464    | TGOLN2       | - | 85398656  | 85408885  |
| chr2  | NM_015963    | THAP4        | - | 242172492 | 242225398 |
| chr2  | NM_022037    | TIA1         | - | 70290079  | 70329283  |
| chr2  | NM_145702    | TIGD1        | - | 233121022 | 233123470 |
| chr2  | NM_001193304 | TMEM127      | - | 96279672  | 96295478  |
| chr2  | NM_015348    | TMEM131      | - | 97739232  | 97978786  |
| chr2  | NM_152834    | TMEM18       | - | 657972    | 667439    |

|       |              |           |   |           |           |
|-------|--------------|-----------|---|-----------|-----------|
| chr16 | NR_024370    | LOC440356 | + | 29782504  | 29786875  |
| chr2  | NM_001083590 | TMEM214   | + | 27109277  | 27118069  |
| chr16 | NR_015441    | LOC652276 | + | 2593385   | 2620496   |
| chr2  | NM_004881    | TP53I3    | - | 24153808  | 24161232  |
| chr2  | NM_016058    | TPRKB     | - | 73810464  | 73818025  |
| chr16 | NM_001144924 | LOC81691  | + | 20725267  | 20768491  |
| chr16 | NM_031490    | LONP2     | + | 46835711  | 46944908  |
| chr16 | NM_001004055 | LRRC29    | - | 65798542  | 65818402  |
| chr2  | NM_017910    | TRMT61B   | - | 28926191  | 28946679  |
| chr16 | NM_018032    | LUC7L     | - | 178970    | 219450    |
| chr2  | NM_025244    | TSGA10    | - | 98980155  | 99137619  |
| chr2  | NM_004622    | TSN       | + | 122229590 | 122241898 |
| chr16 | NM_022818    | MAP1LC3B  | + | 85983301  | 85995881  |
| chr2  | NM_003310    | TSSC1     | - | 3171747   | 3360660   |
| chr16 | NM_001040439 | MAPK8IP3  | + | 1696221   | 1760319   |
| chr2  | NM_152275    | TTC30A    | - | 178187271 | 178191940 |
| chr2  | NM_152517    | TTC30B    | - | 178123126 | 178125770 |
| chr2  | NM_022492    | TTC31     | + | 74563707  | 74575199  |
| chr2  | NM_001008237 | TTC32     | - | 19959994  | 19965225  |
| chr16 | NM_001077180 | METTL9    | + | 21518356  | 21576293  |
| chr16 | NR_024399    | MGC23284  | + | 87257281  | 87281095  |
| chr16 | NM_001142289 | MGRN1     | + | 4614826   | 4680976   |
| chr2  | NM_005783    | TXNDC9    | - | 99301918  | 99319292  |
| chr2  | NM_014607    | UBXN4     | + | 136215658 | 136259103 |
| chr2  | NM_020120    | UGGT1     | + | 128565223 | 128669719 |
| chr2  | NM_001001521 | UGP2      | + | 63921601  | 63972200  |
| chr2  | NM_014044    | UNC50     | + | 98591473  | 98601409  |
| chr2  | NM_020935    | USP37     | - | 219023217 | 219141328 |
| chr2  | NM_006590    | USP39     | + | 85696793  | 85729917  |
| chr16 | NM_014940    | MON1B     | + | 75782336  | 75791044  |
| chr2  | NM_001005753 | VPS24     | - | 86584063  | 86644131  |
| chr16 | NM_005792    | MPHOSPH6  | - | 80739267  | 80761330  |
| chr16 | NM_023936    | MRPS34    | - | 1761896   | 1763141   |
| chr2  | NM_018256    | WDR12     | - | 203453567 | 203485194 |
| chr2  | NM_018383    | WDR33     | - | 128178277 | 128285231 |
| chr2  | NM_001006657 | WDR35     | - | 19973509  | 20053365  |
| chr2  | NM_032168    | WDR75     | + | 190014403 | 190048509 |
| chr2  | NM_138458    | WDR92     | - | 68210784  | 68238160  |
| chr16 | NM_001159377 | MTHFSD    | - | 85121282  | 85146342  |
| chr2  | NM_003400    | XPO1      | - | 61558572  | 61618922  |
| chr16 | NM_002461    | MVD       | - | 87245848  | 87256996  |
| chr2  | NM_032312    | YIPF4     | + | 32356461  | 32385162  |
| chr16 | NM_153029    | N4BP1     | - | 47130137  | 47201621  |
| chr16 | NM_001018159 | NAE1      | - | 65394281  | 65422380  |
| chr16 | NM_016256    | NAGPA     | - | 5014845   | 5023943   |
| chr16 | NM_022493    | NARFL     | - | 719769    | 730998    |
| chr2  | NM_018471    | ZC3H15    | + | 187059129 | 187082332 |

|       |              |            |         |           |           |
|-------|--------------|------------|---------|-----------|-----------|
| chr2  | NM_198581    | ZC3H6      | +       | 112749648 | 112814111 |
| chr2  | NM_032494    | ZC3H8      | -       | 112689910 | 112729135 |
| chr16 | NR_026675    | NCRNA00169 | +       | 21219670  | 21237413  |
| chr16 | NR_024121    | NCRNA00235 | -       | 516847    | 517408    |
| chr16 | NM_005003    | NDUFAB1    | -       | 23499835  | 23515140  |
| chr2  | NM_001017396 | ZNF2       | +       | 95194909  | 95213791  |
| chr16 | NM_032815    | NFATC2IP   | +       | 28869818  | 28885268  |
| chr16 | NM_001199434 | NIP7       | +       | 67930915  | 67934514  |
| chr10 | NM_017824    |            | 5-Mar + | 94040899  | 94103701  |
| chr16 | NM_014062    | NOB1       | -       | 68333274  | 68346330  |
| chr16 | NM_022162    | NOD2       | +       | 49288550  | 49324488  |
| chr10 | NM_001042473 | ACBD5      | -       | 27524148  | 27571074  |
| chr10 | NM_001141945 | ACTA2      | -       | 90684810  | 90741127  |
| chr10 | NM_005736    | ACTR1A     | -       | 104228975 | 104252502 |
| chr16 | NM_001077350 | NPRL3      | -       | 75803     | 128672    |
| chr16 | NM_000903    | NQO1       | -       | 68300804  | 68318034  |
| chr16 | NM_145080    | NSMCE1     | -       | 27143815  | 27187614  |
| chr10 | NM_032804    | ADO        | +       | 64234521  | 64238245  |
| chr16 | NM_002528    | NTHL1      | -       | 2029816   | 2037868   |
| chr16 | NM_002484    | NUBP1      | +       | 10745198  | 10770709  |
| chr16 | NM_012225    | NUBP2      | +       | 1772933   | 1779193   |
| chr16 | NM_001193452 | NUDT16L1   | +       | 4683694   | 4685861   |
| chr16 | NM_007006    | NUDT21     | -       | 55020548  | 55042762  |
| chr16 | NM_005796    | NUTF2      | +       | 66438319  | 66462720  |
| chr16 | NM_018233    | OGFOD1     | +       | 55042924  | 55068908  |
| chr16 | NM_014321    | ORC6       | +       | 45281058  | 45289807  |
| chr10 | NM_173473    | ANAPC16    | +       | 73645811  | 73665624  |
| chr16 | NM_024675    | PALB2      | -       | 23521983  | 23560179  |
| chr10 | NM_014915    | ANKRD26    | -       | 27333050  | 27429433  |
| chr16 | NM_015027    | PDXDC1     | +       | 14976333  | 15039053  |
| chr10 | NM_012095    | AP3M1      | -       | 75550020  | 75580832  |
| chr10 | NM_178815    | ARL5B      | +       | 18988318  | 19006946  |
| chr16 | NM_004203    | PKMYT1     | -       | 2962792   | 2970541   |
| chr10 | NM_001079516 | ASAH2B     | +       | 52169713  | 52184575  |
| chr16 | NM_000303    | PMM2       | +       | 8799170   | 8850695   |
| chr10 | NM_032810    | ATAD1      | -       | 89502854  | 89567897  |
| chr16 | NM_032940    | POLR2C     | +       | 56054051  | 56063422  |
| chr16 | NM_018119    | POLR3E     | +       | 22216241  | 22252844  |
| chr10 | NM_001001976 | ATE1       | -       | 123492614 | 123677536 |
| chr10 | NM_001001973 | ATP5C1     | +       | 7870098   | 7889768   |
| chr16 | NM_001184824 | PRMT7      | +       | 66902377  | 66948670  |
| chr10 | NM_016567    | BCCIP      | +       | 127502093 | 127532254 |
| chr16 | NM_024031    | PRR14      | +       | 30569741  | 30575235  |
| chr10 | NM_173809    | BLOC1S2    | -       | 102023702 | 102036429 |
| chr10 | NM_014753    | BMS1       | +       | 42597959  | 42650391  |
| chr10 | NR_026592    | BMS1P4     | -       | 75128914  | 75160278  |
| chr10 | NM_004052    | BNIP3      | -       | 133631193 | 133645425 |

|       |              |                |   |           |           |
|-------|--------------|----------------|---|-----------|-----------|
| chr10 | NM_003972    | BTA1           | + | 93673715  | 93780060  |
| chr10 | NM_003939    | BTRC           | + | 103103814 | 103307060 |
| chr10 | NM_001007793 | BUB3           | + | 124903749 | 124914876 |
| chr10 | NM_153244    | C10orf111      | - | 15177389  | 15179324  |
| chr16 | NM_001172663 | RAB40C         | + | 579357    | 619274    |
| chr16 | NM_020850    | RANBP10        | - | 66314505  | 66398056  |
| chr16 | NM_005611    | RBL2           | + | 52025851  | 52083061  |
| chr16 | NM_138769    | RHOT2          | + | 658133    | 664172    |
| chr10 | NM_001202438 | C10orf137      | + | 127398073 | 127442702 |
| chr16 | NM_178841    | RNF166         | - | 87290403  | 87300330  |
| chr10 | NM_017782    | C10orf18       | + | 5766806   | 5845709   |
| chr16 | NM_014771    | RNF40          | + | 30681130  | 30694039  |
| chr10 | NM_001163812 | C10orf2        | + | 102737282 | 102744148 |
| chr16 | NM_080594    | RNPS1          | - | 2243100   | 2258414   |
| chr16 | NM_001127897 | RPGRIP1L       | - | 52191318  | 52295272  |
| chr10 | NM_001136200 | C10orf32       | + | 104603956 | 104614708 |
| chr16 | NM_015659    | RSL1D1         | - | 11835555  | 11852943  |
| chr10 | NR_037644    | C10orf32-AS3MT | + | 104603956 | 104651645 |
| chr16 | NM_133368    | RSPRY1         | + | 55777741  | 55830448  |
| chr10 | NM_153810    | C10orf46       | - | 120430483 | 120504748 |
| chr16 | NM_014712    | SETD1A         | + | 30876115  | 30903482  |
| chr16 | NM_001160305 | SETD6          | + | 57106883  | 57111932  |
| chr16 | NM_001145795 | SH2B1          | + | 28782578  | 28793035  |
| chr10 | NM_145247    | C10orf78       | + | 105871805 | 105876133 |
| chr10 | NM_024942    | C10orf88       | - | 124680408 | 124703909 |
| chr16 | NM_032178    | SLC7A6OS       | - | 66892018  | 66902369  |
| chr16 | NM_032444    | SLX4           | - | 3571183   | 3601586   |
| chr10 | NR_026939    | CASC2          | + | 119796321 | 119959655 |
| chr16 | NR_002326    | SNORA64        | - | 1952974   | 1953108   |
| chr10 | NM_001134375 | CCNJ           | + | 97793148  | 97810615  |
| chr16 | NR_003020    | SNORA78        | + | 1955185   | 1955312   |
| chr10 | NM_006023    | CDC123         | + | 12277966  | 12332595  |
| chr16 | NR_002736    | SNORD60        | - | 2145024   | 2145107   |
| chr16 | NR_002450    | SNORD68        | + | 88155338  | 88155410  |
| chr10 | NM_001029954 | CDNF           | - | 14901256  | 14919989  |
| chr10 | NR_028492    | CFLP1          | + | 89568049  | 89595349  |
| chr16 | NM_005632    | SOLH           | + | 517856    | 544637    |
| chr10 | NM_203298    | CHCHD1         | + | 75211813  | 75213412  |
| chr16 | NM_003119    | SPG7           | + | 88102305  | 88151675  |
| chr10 | NM_001278    | CHUK           | - | 101938113 | 101979334 |
| chr10 | NM_018464    | CISD1          | + | 59698900  | 59719025  |
| chr16 | NM_001142448 | SPNS1          | + | 28893596  | 28903370  |
| chr16 | NM_006662    | SRCAP          | + | 30617962  | 30658951  |
| chr10 | NM_014912    | CPEB3          | - | 93798376  | 94040855  |
| chr16 | NM_004604    | STX4           | + | 30952403  | 30958986  |
| chr10 | NM_018590    | CSGALNACT2     | + | 42953939  | 43000755  |
| chr10 | NM_015235    | CSTF2T         | - | 53125251  | 53129361  |

|       |              |          |   |           |           |
|-------|--------------|----------|---|-----------|-----------|
| chr16 | NM_005679    | TAF1C    | - | 82768961  | 82778163  |
| chr16 | NM_004783    | TAOK2    | + | 29892722  | 29911082  |
| chr10 | NM_024040    | CUEDC2   | - | 104172991 | 104182413 |
| chr10 | NM_001198777 | CUL2     | - | 35337484  | 35419576  |
| chr10 | NM_015960    | CUTC     | + | 101481947 | 101505884 |
| chr16 | NM_006453    | TBL3     | + | 1962064   | 1968752   |
| chr10 | NM_018294    | CWF19L1  | - | 101982044 | 102017427 |
| chr16 | NM_007108    | TCEB2    | - | 2761415   | 2767298   |
| chr16 | NM_014972    | TCF25    | + | 88467494  | 88505293  |
| chr16 | NM_018975    | TERF2IP  | + | 74239135  | 74248842  |
| chr16 | NM_020457    | THAP11   | + | 66433713  | 66435599  |
| chr10 | NM_014881    | DCLRE1A  | - | 115584473 | 115603849 |
| chr16 | NM_001142350 | THOC6    | + | 3014032   | 3017757   |
| chr16 | NM_033208    | TIGD7    | - | 3288808   | 3295440   |
| chr10 | NM_004728    | DDX21    | + | 70385897  | 70414285  |
| chr10 | NM_024045    | DDX50    | + | 70331039  | 70376609  |
| chr16 | NM_145254    | TMEM170A | - | 74038423  | 74056085  |
| chr16 | NM_015421    | TMEM186  | - | 8796537   | 8799006   |
| chr10 | NM_001002762 | DNAJB12  | - | 73762593  | 73784913  |
| chr16 | NM_153261    | TMEM188  | + | 48616689  | 48628500  |
| chr10 | NM_015190    | DNAJC9   | - | 74672587  | 74677031  |
| chr10 | NM_015448    | DPCD     | + | 103338078 | 103359400 |
| chr16 | NM_003789    | TRADD    | - | 65745589  | 65751313  |
| chr16 | NM_032271    | TRAF7    | + | 2145799   | 2168131   |
| chr16 | NM_016292    | TRAP1    | - | 3648038   | 3707599   |
| chr16 | NM_000548    | TSC2     | + | 2037990   | 2078714   |
| chr16 | NM_018430    | TSNAXIP1 | + | 66398510  | 66419472  |
| chr10 | NM_003750    | EIF3A    | - | 120784530 | 120830324 |
| chr16 | NM_015914    | TXNDC11  | - | 11680443  | 11744149  |
| chr16 | NM_001142318 | TXNL4B   | - | 70676256  | 70685716  |
| chr16 | NM_194261    | UBE2I    | + | 1299180   | 1315391   |
| chr16 | NM_019116    | UBFD1    | + | 23476362  | 23493211  |
| chr10 | NM_145010    | ENKUR    | - | 25310922  | 25345036  |
| chr16 | NM_003366    | UQCRC2   | + | 21872109  | 21902169  |
| chr10 | NM_000124    | ERCC6    | - | 50334496  | 50417153  |
| chr10 | NM_001100626 | ERLIN1   | - | 101899836 | 101935804 |
| chr10 | NM_016046    | EXOSC1   | - | 99185655  | 99195758  |
| chr10 | NM_173348    | FAM149B1 | + | 74597882  | 74671945  |
| chr16 | NM_018206    | VPS35    | - | 45251089  | 45280645  |
| chr16 | NM_032259    | WDR24    | - | 674702    | 680401    |
| chr10 | NM_024948    | FAM188A  | - | 15860180  | 15942525  |
| chr16 | NM_145294    | WDR90    | + | 639363    | 657830    |
| chr16 | NM_014153    | ZC3H7A   | - | 11751942  | 11798615  |
| chr10 | NM_152644    | FAM24B   | - | 124598599 | 124629147 |
| chr16 | NM_001145548 | ZDHHC7   | - | 83565567  | 83602642  |
| chr16 | NM_001012981 | ZKSCAN2  | - | 25154822  | 25176356  |
| chr16 | NM_003450    | ZNF174   | + | 3391190   | 3399365   |

|       |              |          |   |           |           |
|-------|--------------|----------|---|-----------|-----------|
| chr10 | NM_145235    | FANK1    | + | 127575097 | 127688151 |
| chr10 | NM_000043    | FAS      | + | 90740267  | 90765522  |
| chr16 | NM_001042428 | ZNF205   | + | 3102563   | 3110519   |
| chr16 | NM_145911    | ZNF23    | - | 70039003  | 70053618  |
| chr16 | NM_005741    | ZNF263   | + | 3273487   | 3281460   |
| chr16 | NM_152287    | ZNF276   | + | 88314893  | 88334833  |
| chr10 | NR_033847    | FLJ37035 | - | 127383848 | 127398052 |
| chr16 | NM_017810    | ZNF434   | - | 3372085   | 3391026   |
| chr16 | NM_021646    | ZNF500   | - | 4740815   | 4757167   |
| chr16 | NM_178167    | ZNF598   | - | 1987768   | 1999764   |
| chr10 | NM_145246    | FRA10AC1 | - | 95417629  | 95452319  |
| chr16 | NM_014699    | ZNF646   | + | 30993243  | 31002334  |
| chr16 | NM_024706    | ZNF668   | - | 30979664  | 30993142  |
| chr16 | NM_138447    | ZNF689   | - | 30522200  | 30529183  |
| chr16 | NM_023931    | ZNF747   | - | 30450279  | 30453695  |
| chr16 | NM_153028    | ZNF75A   | + | 3295433   | 3308577   |
| chr10 | NM_173540    | FUT11    | + | 75202054  | 75205982  |
| chr16 | NM_001172679 | ZNF764   | - | 30472585  | 30477143  |
| chr16 | NM_024671    | ZNF768   | - | 30442822  | 30445411  |
| chr16 | NM_001201407 | ZNF778   | + | 87811611  | 87823466  |
| chr16 | NM_152458    | ZNF785   | - | 30499494  | 30504593  |
| chr10 | NM_001115156 | GDI2     | - | 5847191   | 5895518   |
| chr10 | NM_014394    | GHITM    | + | 85889164  | 85903291  |
| chr13 | NM_032859    | ABHD13   | + | 107668763 | 107684604 |
| chr10 | NM_002079    | GOT1     | - | 101146616 | 101180520 |
| chr13 | NM_001142364 | ALG5     | - | 36421907  | 36471504  |
| chr10 | NM_020918    | GPAM     | - | 113899611 | 113933515 |
| chr13 | NM_018011    | ARGLU1   | - | 105993662 | 106018515 |
| chr10 | NM_001191013 | GSTO2    | + | 106018620 | 106049166 |
| chr10 | NM_012341    | GTPBP4   | + | 1024348   | 1053708   |
| chr10 | NM_182765    | HECTD2   | + | 93160075  | 93264500  |
| chr13 | NM_000059    | BRCA2    | + | 31787616  | 31871809  |
| chr13 | NM_001127482 | C13orf1  | - | 49384842  | 49408626  |
| chr13 | NM_025138    | C13orf23 | - | 38482001  | 38510252  |
| chr13 | NM_138779    | C13orf27 | - | 102216463 | 102224150 |
| chr13 | NR_027701    | C13orf29 | - | 110314334 | 110320656 |
| chr10 | NM_012207    | HNRNPH3  | + | 69761773  | 69772959  |
| chr13 | NM_001128303 | C13orf31 | + | 43351419  | 43366068  |
| chr13 | NM_024808    | C13orf34 | + | 72200042  | 72228329  |
| chr10 | NM_016299    | HSPA14   | + | 14920266  | 14953746  |
| chr10 | NM_004969    | IDE      | - | 94201420  | 94323832  |
| chr13 | NM_001079670 | CAB39L   | - | 48780786  | 48916222  |
| chr13 | NM_018210    | CARKD    | + | 110066008 | 110090343 |
| chr13 | NM_018451    | CENPJ    | - | 24354411  | 24395085  |
| chr13 | NM_006493    | CLN5     | + | 76464059  | 76474653  |
| chr13 | NM_031431    | COG3     | + | 44937071  | 45008761  |
| chr10 | NM_015037    | KIAA0913 | + | 75215610  | 75231557  |

|       |              |              |   |           |           |
|-------|--------------|--------------|---|-----------|-----------|
| chr10 | NM_015634    | KIAA1279     | + | 70418482  | 70446745  |
| chr13 | NM_003589    | CUL4A        | + | 112911086 | 112967393 |
| chr10 | NM_016195    | KIF20B       | + | 91451346  | 91524680  |
| chr10 | NM_012311    | KIN          | - | 7837372   | 7869950   |
| chr13 | NM_001128226 | DIS3         | - | 72227540  | 72254345  |
| chr13 | NR_002605    | DLEU1        | + | 49554414  | 49577434  |
| chr13 | NM_006260    | DNAJC3       | + | 95127393  | 95245244  |
| chr13 | NM_000123    | ERCC5        | + | 102296174 | 102326346 |
| chr13 | NM_001984    | ESD          | - | 46243391  | 46269368  |
| chr13 | NM_181503    | EXOSC8       | + | 36472677  | 36481751  |
| chr10 | NR_026754    | LOC100270710 | - | 99467206  | 99467892  |
| chr10 | NR_027428    | LOC219347    | - | 81795968  | 81828929  |
| chr10 | NR_033805    | LOC220906    | - | 28848851  | 28861289  |
| chr10 | NR_033850    | LOC283089    | - | 122511313 | 122600681 |
| chr10 | NR_003930    | LOC387647    | + | 29738506  | 29751305  |
| chr10 | NR_034125    | LOC387723    | - | 131752151 | 131799071 |
| chr10 | NR_027282    | LOC399815    | + | 124629138 | 124648220 |
| chr13 | NM_004128    | GTF2F2       | + | 44592630  | 44756239  |
| chr13 | NM_002097    | GTF3A        | + | 26896680  | 26907846  |
| chr13 | NM_001011724 | HNRNPA1L2    | + | 52089605  | 52115920  |
| chr13 | NM_006644    | HSPH1        | - | 30608762  | 30634117  |
| chr13 | NM_198217    | ING1         | + | 110163083 | 110171422 |
| chr10 | NM_030626    | LRRC27       | + | 133995603 | 134045000 |
| chr13 | NM_152903    | KBTBD6       | - | 40599708  | 40604936  |
| chr13 | NM_032138    | KBTBD7       | - | 40663710  | 40666702  |
| chr10 | NM_001172303 | MASTL        | + | 27483758  | 27515854  |
| chr13 | NM_024089    | KDELC1       | - | 102234631 | 102249405 |
| chr13 | NM_018559    | KIAA1704     | + | 44461686  | 44500404  |
| chr10 | NM_024834    | MCMBP        | - | 121578961 | 121622384 |
| chr10 | NM_212554    | METTL10      | - | 126437395 | 126470429 |
| chr10 | NM_001142434 | MGEA5        | - | 103534189 | 103568212 |
| chr13 | NM_005561    | LAMP1        | + | 112999469 | 113025742 |
| chr13 | NM_001098268 | LIG4         | - | 107657792 | 107668717 |
| chr13 | NR_024458    | LOC100190939 | + | 44813479  | 44863618  |
| chr13 | NR_036531    | LOC100289373 | - | 98646628  | 98651012  |
| chr13 | NM_014166    | MED4         | - | 47548092  | 47567241  |
| chr10 | NM_176792    | MRPL43       | - | 102727568 | 102737262 |
| chr10 | NM_016065    | MRPS16       | - | 74678606  | 74682457  |
| chr10 | NM_138384    | MTG1         | + | 135057610 | 135084164 |
| chr10 | NM_001145260 | NCOA4        | + | 51235113  | 51260740  |
| chr13 | NM_005830    | MRPS31       | - | 40201431  | 40243347  |
| chr13 | NM_001166263 | MTIF3        | - | 26907775  | 26922739  |
| chr10 | NR_026762    | NCRNA00263   | + | 102123322 | 102138101 |
| chr10 | NM_005004    | NDUFB8       | - | 102273486 | 102279626 |
| chr13 | NM_001071775 | MZT1         | - | 72180495  | 72199939  |
| chr13 | NM_174928    | N6AMT2       | - | 20201072  | 20246057  |
| chr13 | NM_001012754 | NHLRC3       | + | 38510454  | 38522246  |

|       |              |         |   |           |           |
|-------|--------------|---------|---|-----------|-----------|
| chr10 | NM_022451    | NOC3L   | - | 96082978  | 96112673  |
| chr13 | NM_018283    | NUDT15  | + | 47509703  | 47519283  |
| chr13 | NM_012345    | NUFIP1  | - | 44411383  | 44461613  |
| chr10 | NM_004741    | NOLC1   | + | 103901922 | 103913617 |
| chr10 | NM_006993    | NPM3    | - | 103531071 | 103533160 |
| chr10 | NM_030759    | NRBF2   | + | 64563012  | 64584792  |
| chr10 | NM_014142    | NUDT5   | - | 12249578  | 12278149  |
| chr13 | NM_001127202 | PCID2   | - | 112879925 | 112911030 |
| chr13 | NM_015932    | POMP    | + | 28131140  | 28151093  |
| chr10 | NM_000917    | P4HA1   | - | 74436985  | 74526738  |
| chr10 | NM_022129    | PBLD    | - | 69712422  | 69762690  |
| chr10 | NM_014976    | PDCD11  | + | 105146401 | 105196009 |
| chr13 | NM_022118    | RBM26   | - | 78792099  | 78877924  |
| chr10 | NM_001199492 | PDCD4   | + | 112621542 | 112649754 |
| chr10 | NM_014317    | PDSS1   | + | 27026600  | 27075732  |
| chr10 | NM_002629    | PGAM1   | + | 99176016  | 99183188  |
| chr13 | NM_005977    | RNF6    | - | 25684904  | 25694508  |
| chr13 | NM_005870    | SAP18   | + | 20612652  | 20621224  |
| chr13 | NM_031915    | SETDB2  | + | 48916429  | 48967140  |
| chr13 | NM_001166017 | SKA3    | - | 20625733  | 20648741  |
| chr10 | NM_001001974 | PLEKHA1 | + | 124124083 | 124181861 |
| chr13 | NM_001135919 | SLC46A3 | - | 28172217  | 28191150  |
| chr10 | NM_001174084 | POLL    | - | 103328628 | 103338017 |
| chr10 | NM_007055    | POLR3A  | - | 79404912  | 79459304  |
| chr10 | NM_021129    | PPA1    | - | 71632591  | 71663196  |
| chr10 | NM_015062    | PPRC1   | + | 103882776 | 103900080 |
| chr10 | NM_003675    | PRPF18  | + | 13668944  | 13712874  |
| chr13 | NM_003850    | SUCLA2  | - | 47414791  | 47473463  |
| chr13 | NM_001130912 | SUGT1   | + | 52124831  | 52160434  |
| chr13 | NM_001146071 | TDRD3   | + | 59868591  | 60046014  |
| chr13 | NM_014305    | TGDS    | - | 94024308  | 94046512  |
| chr13 | NR_002816    | THSD1P1 | - | 51639847  | 51666603  |
| chr13 | NM_004800    | TM9SF2  | + | 98951728  | 99013277  |
| chr10 | NM_021252    | RAB18   | + | 27833254  | 27869105  |
| chr13 | NM_003291    | TPP2    | + | 102047286 | 102129524 |
| chr10 | NM_032905    | RBM17   | + | 6170954   | 6199428   |
| chr10 | NM_001001330 | REEP3   | + | 64951128  | 65054889  |
| chr13 | NM_006322    | TUBGCP3 | - | 112187328 | 112290482 |
| chr10 | NM_001104546 | RPP30   | + | 92621688  | 92658292  |
| chr10 | NM_001097590 | RPP38   | + | 15179187  | 15186262  |
| chr13 | NM_006002    | UCHL3   | + | 75021927  | 75078069  |
| chr13 | NM_016617    | UFM1    | + | 37821941  | 37835143  |
| chr13 | NM_005800    | USPL1   | + | 30089829  | 30131686  |
| chr10 | NM_001142648 | SAR1A   | - | 71579966  | 71600291  |
| chr13 | NM_016075    | VPS36   | - | 51884737  | 51922764  |
| chr10 | NM_007190    | SEC23IP | + | 121642212 | 121691235 |
| chr10 | NM_004922    | SEC24C  | + | 75174136  | 75201939  |



|       |              |           |   |           |           |
|-------|--------------|-----------|---|-----------|-----------|
| chr13 | NM_007187    | WBP4      | + | 40533696  | 40556139  |
| chr10 | NM_001142627 | SEC61A2   | + | 12211645  | 12251963  |
| chr13 | NM_015070    | ZC3H13    | - | 45434314  | 45524895  |
| chr13 | NM_001142684 | ZMYM5     | - | 19295623  | 19335776  |
| chr13 | NM_001164144 | ZNF828    | + | 114098066 | 114110905 |
| chr10 | NM_178858    | SFXN2     | + | 104464287 | 104488936 |
| chr14 | NM_001164814 | ACIN1     | - | 22597613  | 22634663  |
| chr10 | NM_007373    | SHOC2     | + | 112669290 | 112763415 |
| chr14 | NM_012111    | AHSA1     | + | 76994125  | 77005568  |
| chr14 | NM_006020    | ALKBH1    | - | 77208501  | 77244109  |
| chr14 | NM_001145    | ANG       | + | 20222175  | 20232185  |
| chr14 | NM_001663    | ARF6      | + | 49429485  | 49433522  |
| chr10 | NM_003473    | STAM      | + | 17726129  | 17797913  |
| chr14 | NM_002892    | ARID4A    | + | 57834974  | 57910204  |
| chr10 | NM_003171    | SUPV3L1   | + | 70609998  | 70638855  |
| chr14 | NM_014924    | ATG14     | - | 54902862  | 54948329  |
| chr10 | NM_001193424 | SUV39H2   | + | 14960787  | 14986310  |
| chr14 | NM_015994    | ATP6V1D   | - | 66874333  | 66896473  |
| chr14 | NM_001015048 | BAG5      | - | 103092633 | 103098904 |
| chr10 | NM_006951    | TAF5      | + | 105117713 | 105138812 |
| chr10 | NM_003201    | TFAM      | + | 59815181  | 59825903  |
| chr10 | NM_024838    | THNSL1    | + | 25345513  | 25355599  |
| chr10 | NM_001033925 | TIAL1     | - | 121322967 | 121346531 |
| chr14 | NM_001002860 | BTBD7     | - | 92773648  | 92869138  |
| chr14 | NM_007176    | C14orf1   | - | 75186985  | 75197291  |
| chr14 | NM_017799    | C14orf101 | + | 56116263  | 56185985  |
| chr14 | NM_001083908 | C14orf104 | - | 49161641  | 49171698  |
| chr10 | NM_024789    | TMEM180   | + | 104211159 | 104226792 |
| chr14 | NM_018353    | C14orf106 | - | 44742142  | 44792355  |
| chr10 | NM_001134658 | TMEM20    | + | 95643719  | 95652481  |
| chr14 | NM_017924    | C14orf119 | + | 22634627  | 22639505  |
| chr10 | NM_025235    | TNKS2     | + | 93548130  | 93615212  |
| chr10 | NM_030912    | TRIM8     | + | 104394241 | 104408066 |
| chr14 | NM_022495    | C14orf135 | + | 59628381  | 59671285  |
| chr14 | NM_001040662 | C14orf138 | - | 49645099  | 49653047  |
| chr14 | NM_032490    | C14orf142 | - | 92738989  | 92743212  |
| chr10 | NM_001040273 | TYSND1    | - | 71567738  | 71576502  |
| chr14 | NM_144581    | C14orf149 | - | 59009158  | 59020826  |
| chr14 | NM_032374    | C14orf153 | + | 103099051 | 103126989 |
| chr14 | NM_031210    | C14orf156 | + | 77244177  | 77253696  |
| chr10 | NM_080599    | UPF2      | - | 12002027  | 12125029  |
| chr10 | NM_000375    | UROS      | - | 127467136 | 127501827 |
| chr10 | NM_032747    | USMG5     | - | 105138803 | 105146213 |
| chr14 | NM_016039    | C14orf166 | + | 51525977  | 51541170  |
| chr14 | NM_001173978 | C14orf178 | + | 77296925  | 77305838  |
| chr10 | NM_015045    | WAPAL     | - | 88184992  | 88271521  |
| chr14 | NM_001127393 | C14orf2   | - | 103448377 | 103457656 |

|       |              |          |   |           |           |
|-------|--------------|----------|---|-----------|-----------|
| chr10 | NM_018117    | WDR11    | + | 122600676 | 122659028 |
| chr10 | NM_014023    | WDR37    | + | 1092775   | 1168237   |
| chr10 | NM_014263    | YME1L1   | - | 27439388  | 27483327  |
| chr10 | NM_032327    | ZDHHC16  | + | 99195919  | 99207117  |
| chr10 | NM_022494    | ZDHHC6   | - | 114180047 | 114196662 |
| chr10 | NM_001002262 | ZFYVE27  | + | 99486867  | 99510654  |
| chr10 | NM_021045    | ZNF248   | - | 38157904  | 38186492  |
| chr10 | NM_145011    | ZNF25    | - | 38278800  | 38305459  |
| chr10 | NM_006954    | ZNF33A   | + | 38339583  | 38389001  |
| chr10 | NM_006955    | ZNF33B   | - | 42404560  | 42453998  |
| chr14 | NM_006888    | CALM1    | + | 89933079  | 89944372  |
| chr14 | NM_001039771 | CBLN3    | - | 23965579  | 23968571  |
| chr10 | NR_026777    | ZNF37BP  | - | 42328966  | 42368286  |
| chr10 | NM_001143766 | ZNF438   | - | 31173570  | 31360872  |
| chr10 | NM_145312    | ZNF485   | + | 43421860  | 43433358  |
| chr10 | NR_026693    | ZNF487P  | + | 43252579  | 43298013  |
| chr10 | NM_145806    | ZNF511   | + | 134972412 | 134976656 |
| chr14 | NM_020920    | CHD8     | - | 20923192  | 20975297  |
| chr1  | NM_012089    | ABCB10   | - | 227718951 | 227761065 |
| chr1  | NM_002858    | ABCD3    | + | 94656520  | 94756807  |
| chr1  | NM_022735    | ACBD3    | - | 224399002 | 224441046 |
| chr14 | NM_005776    | CNIH     | - | 53963396  | 53977898  |
| chr14 | NM_016468    | COX16    | - | 69861550  | 69896197  |
| chr14 | NM_017437    | CPSF2    | + | 91658050  | 91700296  |
| chr1  | NM_020247    | ADCK3    | + | 225194560 | 225241869 |
| chr1  | NM_001127687 | ADIPOR1  | - | 201176583 | 201194323 |
| chr14 | NM_001344    | DAD1     | - | 22103646  | 22127983  |
| chr14 | NM_001163484 | DCAF11   | + | 23653745  | 23664291  |
| chr1  | NM_017825    | ADPRHL2  | + | 36327039  | 36332120  |
| chr14 | NM_020414    | DDX24    | - | 93587020  | 93617311  |
| chr1  | NM_001040194 | AGTRAP   | + | 11718728  | 11733415  |
| chr1  | NM_006621    | AHCYL1   | + | 110328830 | 110367887 |
| chr14 | NM_177438    | DICER1   | - | 94622317  | 94693512  |
| chr1  | NM_022831    | AIDA     | - | 220907977 | 220952487 |
| chr14 | NM_001933    | DLST     | + | 74418346  | 74440203  |
| chr1  | NM_003689    | AKR7A2   | - | 19503048  | 19511227  |
| chr14 | NM_004094    | EIF2S1   | + | 66896786  | 66922986  |
| chr1  | NM_144988    | ALG14    | - | 95220866  | 95311095  |
| chr14 | NM_001969    | EIF5     | + | 102870245 | 102881114 |
| chr14 | NM_004450    | ERH      | - | 68916592  | 68934774  |
| chr14 | NM_001193360 | EXD2     | + | 68727946  | 68780490  |
| chr14 | NM_006544    | EXOC5    | - | 56738946  | 56805370  |
| chr1  | NM_144567    | ANGEL2   | - | 211232146 | 211255791 |
| chr14 | NM_152445    | FAM161B  | - | 73470457  | 73486588  |
| chr14 | NM_001042430 | FAM164C  | + | 74606051  | 74614552  |
| chr1  | NM_030816    | ANKRD13C | - | 70497272  | 70593005  |
| chr14 | NM_015091    | FAM179B  | + | 44501165  | 44613384  |

|       |              |           |   |           |           |
|-------|--------------|-----------|---|-----------|-----------|
| chr1  | NM_001039888 | ANKRD34A  | + | 144181864 | 144187004 |
| chr14 | NM_020937    | FANCM     | + | 44674885  | 44739843  |
| chr1  | NM_001136478 | ANP32E    | - | 148457340 | 148475128 |
| chr14 | NM_203301    | FBXO33    | - | 38935327  | 38971455  |
| chr1  | NM_006594    | AP4B1     | - | 114239199 | 114249264 |
| chr14 | NM_015962    | FCF1      | + | 74249602  | 74273143  |
| chr1  | NM_001077628 | APH1A     | - | 148504422 | 148508156 |
| chr14 | NM_002013    | FKBP3     | - | 44654551  | 44673482  |
| chr14 | NR_015415    | FLJ45244  | + | 94693777  | 94716023  |
| chr1  | NM_006015    | ARID1A    | + | 26895108  | 26981188  |
| chr1  | NM_005717    | ARPC5     | - | 181861954 | 181871608 |
| chr14 | NM_016417    | GLRX5     | + | 95071075  | 95080808  |
| chr14 | NM_004124    | GMFB      | - | 54010958  | 54025494  |
| chr1  | NM_022786    | ARV1      | + | 229181445 | 229203102 |
| chr14 | NM_005113    | GOLGA5    | + | 92330402  | 92376057  |
| chr1  | NM_001170535 | ATAD3A    | + | 1437385   | 1459930   |
| chr1  | NM_031921    | ATAD3B    | + | 1397026   | 1421445   |
| chr1  | NM_032852    | ATG4C     | + | 63022364  | 63103529  |
| chr14 | NM_145870    | GSTZ1     | + | 76856982  | 76867693  |
| chr14 | NM_201595    | GTF2A1    | - | 80716146  | 80757328  |
| chr1  | NM_001039457 | ATP6V0B   | + | 44213188  | 44216559  |
| chr14 | NM_015382    | HECTD1    | - | 30639074  | 30746440  |
| chr14 | NM_145249    | IFI27L1   | + | 93617391  | 93638813  |
| chr1  | NM_017900    | AURKAIP1  | - | 1298972   | 1300681   |
| chr14 | NM_024658    | IPO4      | - | 23719264  | 23727964  |
| chr1  | NM_152490    | B3GALNT2  | - | 233677155 | 233734404 |
| chr1  | NM_080605    | B3GALT6   | + | 1157491   | 1160283   |
| chr1  | NM_001199873 | B4GALT3   | - | 159407723 | 159414382 |
| chr14 | NM_001098625 | JKAMP     | + | 59020913  | 59041834  |
| chr1  | NM_005872    | BCAS2     | - | 114911703 | 114925788 |
| chr1  | NM_003921    | BCL10     | - | 85504047  | 85515175  |
| chr14 | NM_001039479 | KIAA0317  | - | 74197707  | 74249560  |
| chr1  | NM_003666    | BLZF1     | + | 167603817 | 167632404 |
| chr14 | NM_014672    | KIAA0391  | + | 34661526  | 34813021  |
| chr14 | NM_014749    | KIAA0586  | + | 57964462  | 58085302  |
| chr14 | NM_033426    | KIAA1737  | + | 76634330  | 76653383  |
| chr1  | NM_006085    | BPNT1     | - | 218297446 | 218329814 |
| chr14 | NM_001130107 | KLC1      | + | 103165277 | 103237641 |
| chr1  | NM_144695    | BROX      | + | 220952528 | 220972729 |
| chr14 | NM_017658    | KLHL28    | - | 44463276  | 44500929  |
| chr1  | NM_001143888 | BSDC1     | - | 32603291  | 32632649  |
| chr1  | NM_001006945 | C1orf103  | - | 111291334 | 111308089 |
| chr1  | NM_001039517 | C1orf104  | - | 153556874 | 153560562 |
| chr1  | NM_017850    | C1orf109  | - | 37919828  | 37928779  |
| chr14 | NR_024334    | LOC645431 | - | 64947063  | 64949088  |
| chr14 | NM_001195082 | LOC647310 | + | 104935964 | 104951241 |
| chr1  | NM_018186    | C1orf112  | + | 168031173 | 168088853 |

|       |              |            |   |           |           |
|-------|--------------|------------|---|-----------|-----------|
| chr1  | NM_001142726 | C1orf122   | + | 38046059  | 38047713  |
| chr1  | NM_017887    | C1orf123   | - | 53452359  | 53458877  |
| chr14 | NM_144578    | MAPK1IP1L  | + | 54588114  | 54606665  |
| chr1  | NM_001010984 | C1orf124   | + | 229540304 | 229556612 |
| chr1  | NM_020362    | C1orf128   | + | 23977462  | 23987309  |
| chr1  | NM_152379    | C1orf131   | - | 229426131 | 229443547 |
| chr14 | NM_019852    | METTL3     | - | 21036121  | 21049297  |
| chr14 | NM_002408    | MGAT2      | + | 49157238  | 49159949  |
| chr1  | NM_001114600 | C1orf144   | + | 16566169  | 16597227  |
| chr1  | NM_033418    | C1orf156   | - | 168028295 | 168030655 |
| chr1  | NM_152365    | C1orf172   | - | 27148633  | 27159488  |
| chr1  | NM_207356    | C1orf174   | - | 3795556   | 3806717   |
| chr1  | NM_198926    | C1orf183   | - | 112066208 | 112099942 |
| chr1  | NM_138428    | C1orf212   | - | 35088549  | 35098004  |
| chr1  | NR_033690    | C1orf213   | + | 23568050  | 23570917  |
| chr1  | NM_001164245 | C1orf27    | + | 184611512 | 184657126 |
| chr1  | NM_001012985 | C1orf31    | + | 232576051 | 232586414 |
| chr1  | NM_024319    | C1orf35    | - | 226355050 | 226357645 |
| chr1  | NM_001098616 | C1orf43    | - | 152445806 | 152459897 |
| chr1  | NM_024097    | C1orf50    | + | 43005502  | 43014002  |
| chr1  | NM_001024594 | C1orf53    | + | 196138304 | 196143120 |
| chr1  | NM_152608    | C1orf55    | - | 224237025 | 224253689 |
| chr1  | NM_020317    | C1orf63    | - | 25441326  | 25446572  |
| chr14 | NM_001040108 | MLH3       | - | 74550219  | 74587988  |
| chr1  | NM_001010867 | C1orf69    | + | 226420051 | 226436581 |
| chr1  | NM_152485    | C1orf74    | - | 208022284 | 208024513 |
| chr1  | NM_015607    | C1orf77    | + | 151873148 | 151884603 |
| chr1  | NM_001012961 | C1orf84    | + | 43628142  | 43645152  |
| chr14 | NM_018229    | MUDENG     | + | 56805358  | 56826550  |
| chr1  | NM_030907    | C1orf89    | - | 16430768  | 16436246  |
| chr1  | NM_014283    | C1orf9     | + | 170768882 | 170847596 |
| chr1  | NM_019118    | C1orf91    | - | 32454384  | 32460513  |
| chr14 | NM_004545    | NDUFB1     | - | 91652220  | 91657906  |
| chr14 | NM_006156    | NEDD8      | - | 23755896  | 23771416  |
| chr14 | NM_001199823 | NEDD8-MDP1 | - | 23752982  | 23771416  |
| chr14 | NM_033116    | NEK9       | - | 74618570  | 74663531  |
| chr14 | NM_001042635 | NGDN       | + | 23008737  | 23017242  |
| chr1  | NM_001007214 | CACYBP     | + | 173235193 | 173247786 |
| chr1  | NM_001105530 | CAP1       | + | 40278841  | 40310908  |
| chr1  | NM_006135    | CAPZA1     | + | 112963597 | 113015764 |
| chr1  | NM_001079843 | CASZ1      | - | 10619252  | 10779294  |
| chr1  | NM_032449    | CC2D1B     | - | 52588852  | 52604465  |
| chr1  | NR_033296    | CCDC163P   | - | 45732184  | 45738338  |
| chr1  | NM_206886    | CCDC18     | + | 93418507  | 93516856  |
| chr1  | NM_022778    | CCDC21     | + | 26433279  | 26477886  |
| chr14 | NM_017807    | OSGEP      | - | 19985046  | 19993107  |
| chr1  | NM_152499    | CCDC24     | + | 44229866  | 44234785  |

|       |              |          |   |           |           |
|-------|--------------|----------|---|-----------|-----------|
| chr14 | NM_005015    | OXA1L    | + | 22305570  | 22310838  |
| chr1  | NM_019083    | CCDC76   | + | 100371293 | 100388642 |
| chr1  | NM_030937    | CCNL2    | - | 1310953   | 1324581   |
| chr1  | NM_001008800 | CCT3     | - | 154545375 | 154574830 |
| chr14 | NM_032632    | PAPOLA   | + | 96038472  | 96103201  |
| chr14 | NM_001042618 | PARP2    | + | 19881612  | 19895903  |
| chr14 | NM_004569    | PIGH     | - | 67125775  | 67136770  |
| chr14 | NM_002687    | PNN      | + | 38714137  | 38722173  |
| chr14 | NM_013382    | POMT2    | - | 76811051  | 76856978  |
| chr14 | NM_152329    | PPIL5    | + | 49135164  | 49151140  |
| chr1  | NM_001039802 | CDC42    | + | 22251706  | 22292023  |
| chr14 | NM_017917    | PPP2R3C  | - | 34624428  | 34661270  |
| chr1  | NM_001038707 | CDC42SE1 | - | 149290070 | 149298749 |
| chr1  | NM_001134419 | CDC7     | + | 91738991  | 91763909  |
| chr1  | NM_018101    | CDCA8    | + | 37930745  | 37947978  |
| chr1  | NM_024011    | CDK11A   | - | 1624029   | 1645651   |
| chr14 | NM_001039619 | PRMT5    | - | 22459572  | 22468501  |
| chr1  | NM_033486    | CDK11B   | - | 1560962   | 1645635   |
| chr14 | NM_017922    | PRPF39   | + | 44623051  | 44654554  |
| chr14 | NM_002791    | PSMA6    | + | 34831324  | 34856431  |
| chr14 | NM_001130725 | PSMB5    | - | 22564899  | 22574269  |
| chr1  | NM_016343    | CENPF    | + | 212843154 | 212904537 |
| chr14 | NM_002802    | PSMC1    | + | 89792646  | 89808719  |
| chr1  | NM_001127181 | CENPL    | - | 172035310 | 172060400 |
| chr1  | NM_001042404 | CEP170   | - | 241354352 | 241485331 |
| chr14 | NM_032846    | RAB2B    | - | 20997018  | 21014972  |
| chr14 | NM_182836    | RABGGTA  | - | 23804583  | 23810643  |
| chr14 | NM_014226    | RAGE     | - | 101764930 | 101841284 |
| chr14 | NM_001077351 | RBM23    | - | 22439693  | 22458236  |
| chr14 | NM_021239    | RBM25    | + | 72594973  | 72657829  |
| chr1  | NM_001826    | CKS1B    | + | 153213741 | 153218349 |
| chr1  | NM_001286    | CLCN6    | + | 11788793  | 11825788  |
| chr14 | NM_002937    | RNASE4   | + | 20222211  | 20238598  |
| chr1  | NM_003993    | CLK2     | - | 153499282 | 153509905 |
| chr1  | NM_014184    | CNIH4    | + | 222611217 | 222630318 |
| chr1  | NM_152609    | CNST     | + | 244796261 | 244898507 |
| chr1  | NM_001145036 | COG2     | + | 228844824 | 228896354 |
| chr14 | NM_004755    | RPS6KA5  | - | 90406922  | 90596746  |
| chr14 | NM_001010860 | SAMD15   | + | 76913514  | 76927340  |
| chr1  | NM_001098398 | COPA     | - | 158525000 | 158579978 |
| chr14 | NM_021818    | SAV1     | - | 50170109  | 50204773  |
| chr14 | NM_016106    | SCFD1    | + | 30161271  | 30274769  |
| chr14 | NM_004713    | SDCCAG1  | - | 49320281  | 49389289  |
| chr14 | NM_006364    | SEC23A   | - | 38570873  | 38642188  |
| chr1  | NM_130898    | CREB3L4  | + | 152207020 | 152213456 |
| chr1  | NM_181715    | CRTC2    | - | 152186771 | 152197756 |
| chr1  | NM_001130042 | CRYZ     | - | 74943759  | 74971680  |

|       |              |          |   |           |           |
|-------|--------------|----------|---|-----------|-----------|
| chr14 | NM_001009182 | SIP1     | + | 38653238  | 38675928  |
| chr1  | NM_001190463 | CTH      | + | 70649488  | 70678122  |
| chr1  | NM_001134402 | CYB561D1 | + | 109838180 | 109844586 |
| chr14 | NM_001172702 | SLC38A6  | + | 60517584  | 60620204  |
| chr14 | NM_018375    | SLC39A9  | + | 68935159  | 68998860  |
| chr14 | NM_032560    | SMEK1    | - | 90993708  | 91046397  |
| chr1  | NM_001199849 | DAP3     | + | 153925505 | 153975424 |
| chr1  | NM_018122    | DARS2    | + | 172060419 | 172094305 |
| chr1  | NM_015726    | DCAF8    | - | 158452128 | 158498974 |
| chr1  | NM_001099434 | DCDC2B   | + | 32447281  | 32454384  |
| chr1  | NM_022836    | DCLRE1B  | + | 114249437 | 114258231 |
| chr1  | NM_005216    | DDOST    | - | 20850846  | 20860624  |
| chr1  | NM_007204    | DDX20    | + | 112099712 | 112111722 |
| chr1  | NM_001031725 | DDX59    | - | 198879787 | 198905749 |
| chr1  | NM_001039711 | DEDD     | - | 159357391 | 159369102 |
| chr1  | NM_003676    | DEGS1    | + | 222437550 | 222447765 |
| chr1  | NM_004401    | DFFA     | - | 10443189  | 10455200  |
| chr1  | NM_004402    | DFFB     | + | 3763704   | 3791853   |
| chr1  | NM_024887    | DHDDS    | + | 26631388  | 26670382  |
| chr1  | NM_001034023 | DMAP1    | + | 44451711  | 44458938  |
| chr14 | NM_012245    | SNW1     | - | 77253696  | 77297250  |
| chr1  | NM_007034    | DNAJB4   | + | 78243223  | 78255583  |
| chr14 | NM_080867    | SOCS4    | + | 54563593  | 54585959  |
| chr1  | NM_018198    | DNAJC11  | - | 6616814   | 6684553   |
| chr1  | NM_015291    | DNAJC16  | + | 15725938  | 15770815  |
| chr14 | NM_001146282 | SRP54    | + | 34521854  | 34568524  |
| chr1  | NM_014597    | DNTTIP2  | - | 94107601  | 94117350  |
| chr1  | NM_001039589 | DPH2     | + | 44208239  | 44211630  |
| chr1  | NM_001077394 | DPH5     | - | 101227768 | 101263950 |
| chr14 | NM_007192    | SUPT16H  | - | 20889470  | 20922265  |
| chr1  | NM_001938    | DR1      | + | 93584065  | 93600736  |
| chr1  | NM_178454    | DRAM2    | - | 111461476 | 111484361 |
| chr1  | NM_015375    | DSTYK    | - | 203378253 | 203447350 |
| chr1  | NM_016448    | DTL      | + | 210275541 | 210344810 |
| chr1  | NM_007240    | DUSP12   | + | 159986204 | 159993576 |
| chr1  | NM_001004023 | DYRK3    | + | 204875503 | 204889165 |
| chr14 | NM_012460    | TIMM9    | - | 57945122  | 57963985  |
| chr14 | NM_006405    | TM9SF1   | - | 23728192  | 23734722  |
| chr14 | NM_006827    | TMED10   | - | 74667923  | 74713102  |
| chr14 | NM_213601    | TMED8    | - | 76877866  | 76913149  |
| chr1  | NM_025191    | EDEM3    | - | 182926247 | 182990664 |
| chr14 | NM_001100814 | TMEM55B  | - | 19995851  | 19999477  |
| chr1  | NM_032437    | EFCAB7   | + | 63761600  | 63810952  |
| chr14 | NM_030755    | TMX1     | + | 50776635  | 50794122  |
| chr14 | NM_014828    | TOX4     | + | 21015174  | 21037159  |
| chr1  | NM_024852    | EIF2C3   | + | 36169358  | 36294650  |
| chr14 | NM_001079537 | TRAPPC6B | - | 38686765  | 38709385  |

|       |              |          |   |           |           |
|-------|--------------|----------|---|-----------|-----------|
| chr1  | NM_001201478 | EIF2D    | - | 204831597 | 204852527 |
| chr1  | NM_003757    | EIF3I    | + | 32460557  | 32469792  |
| chr14 | NM_004239    | TRIP11   | - | 91503995  | 91576156  |
| chr14 | NM_020810    | TRMT5    | - | 60507919  | 60517535  |
| chr14 | NM_001193314 | VIPAR    | - | 76962770  | 76993736  |
| chr14 | NM_006370    | VTI1B    | - | 67187618  | 67211355  |
| chr14 | NM_173701    | WARS     | - | 99869877  | 99912433  |
| chr14 | NM_001008396 | WDHD1    | - | 54475405  | 54563569  |
| chr14 | NM_001161476 | WDR25    | + | 99912507  | 100066393 |
| chr14 | NM_080666    | WDR89    | - | 63133509  | 63178344  |
| chr14 | NM_019589    | YLPM1    | + | 74299821  | 74373766  |
| chr14 | NM_014950    | ZBTB1    | + | 64041044  | 64070161  |
| chr14 | NM_006977    | ZBTB25   | - | 64023307  | 64040307  |
| chr1  | NM_001145312 | ETV3     | - | 155361082 | 155375007 |
| chr14 | NM_001160103 | ZC3H14   | + | 88099005  | 88149606  |
| chr1  | NM_130398    | EXO1     | + | 240078115 | 240119864 |
| chr1  | NM_175876    | EXOC8    | - | 229535104 | 229540201 |
| chr1  | NM_001001998 | EXOSC10  | - | 11049262  | 11082525  |
| chr14 | NM_015346    | ZFYVE26  | - | 67282989  | 67353059  |
| chr1  | NM_001990    | EYA3     | - | 28173405  | 28287718  |
| chr1  | NM_016946    | F11R     | - | 159231624 | 159257757 |
| chr14 | NM_021188    | ZNF410   | + | 73423338  | 73468556  |
| chr11 | NM_015423    | AASDHPPT | + | 105453501 | 105474629 |
| chr11 | NM_014384    | ACAD8    | + | 133628643 | 133640956 |
| chr11 | NM_001127219 | ACCS     | + | 44044304  | 44062145  |
| chr11 | NM_001610    | ACP2     | - | 47217428  | 47227033  |
| chr11 | NM_003977    | AIP      | + | 67007080  | 67015155  |
| chr11 | NM_001007027 | ALG8     | - | 77489635  | 77528347  |
| chr11 | NM_139178    | ALKBH3   | + | 43858932  | 43898401  |
| chr1  | NM_001099625 | FAM54B   | + | 26018983  | 26032020  |
| chr1  | NM_001163258 | FAM63A   | - | 149235924 | 149247478 |
| chr11 | NM_182603    | ANKRD42  | + | 82582938  | 82637661  |
| chr11 | NM_017704    | ANKRD49  | + | 93866800  | 93872392  |
| chr11 | NM_015957    | APIP     | - | 34860418  | 34894515  |
| chr1  | NM_001136115 | FBXO28   | + | 222368413 | 222416372 |
| chr1  | NM_018994    | FBXO42   | - | 16449145  | 16551535  |
| chr11 | NM_032389    | ARFGAP2  | - | 47142427  | 47154995  |
| chr11 | NM_012402    | ARFIP2   | - | 6453501   | 6459171   |
| chr11 | NM_004308    | ARHGAP1  | - | 46655207  | 46678696  |
| chr1  | NM_001135822 | FDPS     | + | 153545162 | 153557081 |
| chr1  | NM_000143    | FH       | - | 239727479 | 239749708 |
| chr11 | NM_015104    | ATG2A    | - | 64418579  | 64441298  |
| chr11 | NM_015459    | ATL3     | - | 63153012  | 63195659  |
| chr1  | NM_001184891 | FLAD1    | + | 153222393 | 153232211 |
| chr11 | NM_006476    | ATP5L    | + | 117777313 | 117785772 |
| chr11 | NM_012200    | B3GAT3   | - | 62139343  | 62146024  |
| chr11 | NM_001143985 | BANF1    | + | 65526125  | 65528193  |

|       |              |          |   |           |           |
|-------|--------------|----------|---|-----------|-----------|
| chr11 | NM_024649    | BBS1     | + | 66034694  | 66057660  |
| chr11 | NR_033312    | BDNF-AS1 | + | 27484974  | 27676294  |
| chr11 | NM_001098787 | BET1L    | - | 192923    | 197422    |
| chr11 | NM_001166    | BIRC2    | + | 101723175 | 101754611 |
| chr11 | NM_001024957 | BRMS1    | - | 65861379  | 65869158  |
| chr11 | NM_001130702 | BSDL2    | - | 62214322  | 62233622  |
| chr1  | NM_001199328 | FPGT     | + | 74436483  | 74446736  |
| chr11 | NM_022761    | C11orf1  | + | 111255157 | 111260007 |
| chr1  | NM_003902    | FUBP1    | - | 78186178  | 78217365  |
| chr11 | NM_014206    | C11orf10 | - | 61313177  | 61316661  |
| chr1  | NM_144618    | GABPB2   | + | 149309703 | 149357631 |
| chr11 | NM_013265    | C11orf2  | + | 64620258  | 64635756  |
| chr11 | NM_020193    | C11orf30 | + | 75833716  | 75940237  |
| chr11 | NM_170746    | C11orf31 | + | 57265297  | 57267459  |
| chr1  | NM_001005741 | GBA      | - | 153470862 | 153481277 |
| chr1  | NR_002188    | GBAP1    | - | 153450239 | 153463949 |
| chr11 | NM_152316    | C11orf46 | + | 30301224  | 30315741  |
| chr11 | NM_014042    | C11orf51 | - | 71498280  | 71501470  |
| chr1  | NM_017686    | GDAP2    | - | 118207629 | 118273825 |
| chr1  | NR_002830    | GEMIN8P4 | - | 90231411  | 90233113  |
| chr11 | NM_014039    | C11orf54 | + | 93114440  | 93135895  |
| chr11 | NM_001082969 | C11orf57 | + | 111450177 | 111461084 |
| chr1  | NM_001037277 | GGPS1    | + | 233558375 | 233574467 |
| chr11 | NM_014267    | C11orf58 | + | 16716723  | 16736477  |
| chr11 | NM_017907    | C11orf59 | - | 71485985  | 71492081  |
| chr1  | NM_020435    | GJC2     | + | 226404175 | 226414150 |
| chr11 | NM_019021    | C11orf71 | - | 113767379 | 113776349 |
| chr11 | NM_016401    | C11orf73 | + | 85690900  | 85734633  |
| chr1  | NM_053274    | GLMN     | - | 92484542  | 92537154  |
| chr11 | NM_138787    | C11orf74 | + | 36572668  | 36637393  |
| chr11 | NM_024650    | C11orf80 | + | 66268782  | 66367563  |
| chr11 | NM_145018    | C11orf82 | + | 82290384  | 82323347  |
| chr11 | NM_001085372 | C11orf83 | + | 62195701  | 62197738  |
| chr1  | NM_006496    | GNAI3    | + | 109892708 | 109939975 |
| chr1  | NM_014236    | GNPAT    | + | 229443541 | 229480342 |
| chr1  | NR_002328    | GNRHR2   | - | 144221176 | 144227433 |
| chr1  | NM_152281    | GORAB    | + | 168767886 | 168789598 |
| chr1  | NM_022078    | GPATCH3  | - | 27089565  | 27099549  |
| chr11 | NM_015531    | C2CD3    | - | 73423127  | 73559712  |
| chr1  | NM_021639    | GPBP1L1  | - | 45865562  | 45924889  |
| chr1  | NM_018066    | GPN2     | - | 27078459  | 27089456  |
| chr11 | NM_001014437 | CARS     | - | 2978727   | 3035257   |
| chr11 | NM_025004    | CCDC15   | + | 124329226 | 124416595 |
| chr11 | NM_024725    | CCDC82   | - | 95725576  | 95762731  |
| chr1  | NM_001514    | GTF2B    | - | 89090908  | 89129889  |
| chr1  | NM_000858    | GUK1     | + | 226394551 | 226403278 |
| chr11 | NM_024098    | CCDC86   | + | 60366004  | 60375137  |



|       |              |              |   |           |           |
|-------|--------------|--------------|---|-----------|-----------|
| chr11 | NM_018219    | CCDC87       | - | 66114215  | 66117130  |
| chr11 | NM_021825    | CCDC90B      | - | 82650149  | 82675025  |
| chr1  | NM_001018837 | HAX1         | + | 152511662 | 152514975 |
| chr1  | NM_006402    | HBXIP        | - | 110745399 | 110752069 |
| chr11 | NM_005125    | CCS          | + | 66117265  | 66130066  |
| chr1  | NM_024602    | HECTD3       | - | 45240806  | 45249614  |
| chr11 | NM_080668    | CDCA5        | - | 64601502  | 64608191  |
| chr11 | NM_005851    | CDK2AP2      | - | 67030543  | 67032678  |
| chr1  | NM_001031693 | HHLA3        | + | 70593080  | 70606293  |
| chr1  | NM_033055    | HIAT1        | + | 100276376 | 100321517 |
| chr11 | NM_005507    | CFL1         | - | 65378860  | 65382380  |
| chr11 | NM_016565    | CHCHD8       | - | 73261360  | 73265538  |
| chr11 | NM_001293    | CLNS1A       | - | 77004843  | 77026499  |
| chr11 | NM_001142597 | CLP1         | + | 57181791  | 57185913  |
| chr1  | NM_001102397 | HNRNPR       | - | 23508862  | 23543440  |
| chr1  | NM_016287    | HP1BP3       | - | 20941757  | 20985768  |
| chr11 | NM_001101653 | COMMD9       | - | 36250417  | 36267575  |
| chr11 | NM_001144061 | COPB1        | - | 14435624  | 14478017  |
| chr11 | NM_004074    | COX8A        | + | 63498654  | 63500591  |
| chr11 | NM_001136040 | CPSF7        | - | 60926695  | 60954040  |
| chr11 | NM_001039618 | CREBZF       | - | 85046255  | 85053830  |
| chr11 | NM_014633    | CTR9         | + | 10729386  | 10757866  |
| chr11 | NM_016403    | CWC15        | - | 94335434  | 94346424  |
| chr11 | NM_001161454 | CYBASC3      | - | 60872795  | 60886331  |
| chr11 | NM_024514    | CYP2R1       | - | 14856131  | 14870327  |
| chr11 | NM_015533    | DAK          | + | 60857229  | 60872807  |
| chr1  | NM_001193321 | IKBKE        | + | 204710208 | 204736846 |
| chr11 | NM_181807    | DCDC1        | - | 31240746  | 31347897  |
| chr11 | NM_032299    | DCUN1D5      | - | 102426622 | 102468154 |
| chr11 | NM_001923    | DDB1         | - | 60823494  | 60857242  |
| chr1  | NM_004515    | ILF2         | - | 151901137 | 151910103 |
| chr11 | NM_004397    | DDX6         | - | 118123682 | 118167182 |
| chr11 | NM_021008    | DEAF1        | - | 634224    | 685740    |
| chr1  | NM_023015    | INTS3        | + | 151967190 | 152013179 |
| chr1  | NM_014652    | IPO13        | + | 44185064  | 44206281  |
| chr1  | NM_001145349 | IPP          | - | 45932584  | 45989072  |
| chr1  | NM_001160042 | IQCC         | + | 32443822  | 32446875  |
| chr11 | NM_138368    | DKFZp761E198 | - | 65299953  | 65304398  |
| chr1  | NM_030980    | ISG20L2      | - | 154959036 | 154964329 |
| chr1  | NM_014288    | ITGB3BP      | - | 63679049  | 63761423  |
| chr11 | NM_181706    | DNAJC24      | + | 31347952  | 31410958  |
| chr1  | NM_006469    | IVNS1ABP     | - | 183532144 | 183553084 |
| chr11 | NM_001382    | DPAGT1       | - | 118472422 | 118477995 |
| chr11 | NM_006268    | DPF2         | + | 64857921  | 64877027  |
| chr1  | NM_001161465 | JMJD4        | - | 225985512 | 225989735 |
| chr11 | NM_005700    | DPP3         | + | 66004455  | 66033706  |
| chr11 | NM_003797    | EED          | + | 85633462  | 85667428  |

|       |              |              |   |           |           |
|-------|--------------|--------------|---|-----------|-----------|
| chr11 | NM_001404    | EEF1G        | - | 62083648  | 62098036  |
| chr1  | NM_002245    | KCNK1        | + | 231816372 | 231874881 |
| chr11 | NM_001007277 | EI24         | + | 124944507 | 124959785 |
| chr11 | NM_032325    | EIF1AD       | - | 65520592  | 65526154  |
| chr11 | NM_003754    | EIF3F        | + | 7965442   | 7974294   |
| chr11 | NM_006360    | EIF3M        | + | 32561966  | 32580590  |
| chr1  | NM_001009999 | KDM1A        | + | 23218527  | 23282771  |
| chr11 | NM_001042559 | EIF4G2       | - | 10775168  | 10787158  |
| chr1  | NM_014663    | KDM4A        | + | 43888383  | 43943776  |
| chr1  | NM_006559    | KHDRBS1      | + | 32252077  | 32282059  |
| chr1  | NM_015047    | KIAA0090     | - | 19417170  | 19450633  |
| chr1  | NM_024874    | KIAA0319L    | - | 35671677  | 35795624  |
| chr11 | NM_004451    | ESRRA        | + | 63829619  | 63840786  |
| chr1  | NM_014704    | KIAA0562     | - | 3718504   | 3763657   |
| chr1  | NM_014949    | KIAA0907     | - | 154149459 | 154170812 |
| chr11 | NM_003824    | FADD         | + | 69726916  | 69731156  |
| chr11 | NM_024556    | FAM118B      | + | 125586828 | 125638089 |
| chr1  | NM_014875    | KIF14        | - | 198787247 | 198856485 |
| chr11 | NM_015159    | FAM168A      | - | 72794675  | 72986876  |
| chr11 | NM_144664    | FAM76B       | - | 95141753  | 95162602  |
| chr11 | NM_022725    | FANCF        | - | 22600654  | 22603963  |
| chr1  | NM_021633    | KLHL12       | - | 201126852 | 201162994 |
| chr11 | NM_001997    | FAU          | - | 64644674  | 64646248  |
| chr1  | NM_014458    | KLHL20       | + | 171950702 | 172022463 |
| chr11 | NM_138378    | FDXACB1      | - | 111249989 | 111255363 |
| chr11 | NM_004111    | FEN1         | + | 61316725  | 61321286  |
| chr1  | NM_173852    | KRTCAP2      | - | 153408507 | 153412428 |
| chr11 | NM_004214    | FIBP         | - | 65407786  | 65412586  |
| chr11 | NM_004470    | FKBP2        | + | 63764988  | 63768183  |
| chr11 | NM_015308    | FNBP4        | - | 47694644  | 47745569  |
| chr11 | NM_017547    | FOXRED1      | + | 125644144 | 125653237 |
| chr11 | NM_012192    | FXC1         | + | 6459252   | 6462487   |
| chr1  | NM_001146289 | LEPRE1       | - | 42984592  | 43005342  |
| chr1  | NM_173083    | LIN9         | - | 224485485 | 224563821 |
| chr11 | NM_001142307 | GTF2H1       | + | 18300391  | 18345166  |
| chr11 | NM_173811    | HARB1        | - | 46581431  | 46595353  |
| chr1  | NR_034089    | LOC100131564 | - | 93548253  | 93583956  |
| chr11 | NM_015517    | HINFP        | + | 118497497 | 118510975 |
| chr11 | NM_001048200 | HIPK3        | + | 33235743  | 33332515  |
| chr1  | NR_033827    | LOC100132774 | - | 43937995  | 43945599  |
| chr11 | NM_001079559 | HNRNPUL2     | - | 62238795  | 62251397  |
| chr1  | NR_024455    | LOC100133612 | + | 3806827   | 3821871   |
| chr11 | NM_007216    | HPS5         | - | 18256792  | 18300297  |
| chr11 | NM_006597    | HSPA8        | - | 122433409 | 122438054 |
| chr11 | NM_002180    | IGHMBP2      | + | 68427894  | 68464645  |
| chr11 | NM_001014794 | ILK          | + | 6581539   | 6588675   |
| chr11 | NM_144981    | IMMP1L       | - | 31410524  | 31487745  |

|       |              |              |   |           |           |
|-------|--------------|--------------|---|-----------|-----------|
| chr1  | NR_036557    | LOC401980    | - | 201222202 | 201243016 |
| chr1  | NR_036595    | LOC440600    | - | 110630520 | 110683316 |
| chr11 | NM_033547    | INTS4        | - | 77267413  | 77383365  |
| chr11 | NM_030628    | INTS5        | - | 62170895  | 62177350  |
| chr11 | NM_006391    | IPO7         | + | 9362744   | 9426250   |
| chr11 | NM_003772    | JRKL         | + | 95762805  | 95766375  |
| chr11 | NM_006388    | KAT5         | + | 65236064  | 65243651  |
| chr11 | NM_152433    | KBTBD3       | - | 105427034 | 105453675 |
| chr11 | NM_018095    | KBTBD4       | - | 47550324  | 47557143  |
| chr11 | NM_001029859 | KCTD21       | - | 77559945  | 77577312  |
| chr11 | NM_018039    | KDM4D        | + | 94346492  | 94372324  |
| chr11 | NM_033395    | KIAA1731     | + | 93034463  | 93103170  |
| chr11 | NM_032424    | KIAA1826     | - | 105383838 | 105398164 |
| chr11 | NM_031217    | KIF18A       | - | 27998738  | 28086322  |
| chr1  | NM_014813    | LRIG2        | + | 113417353 | 113468865 |
| chr1  | NM_017768    | LRRC40       | - | 70383072  | 70443949  |
| chr1  | NM_006369    | LRRC41       | - | 46516658  | 46541625  |
| chr1  | NM_020710    | LRRC47       | - | 3686643   | 3702928   |
| chr11 | NM_001135239 | LDHA         | + | 18372511  | 18386341  |
| chr11 | NM_018362    | LIN7C        | - | 27472540  | 27484902  |
| chr1  | NM_007260    | LYPLA2       | + | 23990232  | 23994616  |
| chr1  | NM_138794    | LYPLAL1      | + | 217413814 | 217452830 |
| chr1  | NM_001136543 | LYSMD1       | - | 149398847 | 149405048 |
| chr11 | NR_034094    | LOC100129827 | + | 10519362  | 10578055  |
| chr1  | NM_032368    | LZIC         | - | 9912362   | 9925413   |
| chr11 | NR_024469    | LOC100130987 | + | 66841885  | 66915734  |
| chr11 | NR_029192    | LOC100133315 | - | 71254202  | 71317141  |
| chr1  | NM_002370    | MAGOH        | - | 53465151  | 53476870  |
| chr1  | NM_006699    | MAN1A2       | + | 117711607 | 117869843 |
| chr11 | NR_034027    | LOC338739    | + | 33139778  | 33169718  |
| chr11 | NR_033972    | LOC440028    | - | 9732892   | 9737656   |
| chr1  | NM_022756    | MEAF6        | - | 37730762  | 37752951  |
| chr1  | NM_001127350 | MED18        | + | 28528099  | 28535065  |
| chr1  | NM_052877    | MED8         | - | 43622174  | 43628070  |
| chr1  | NM_005920    | MEF2D        | - | 154700142 | 154737153 |
| chr1  | NM_001007239 | METTL13      | + | 170017383 | 170033479 |
| chr11 | NR_034137    | LOC729013    | + | 10836339  | 10857399  |
| chr1  | NM_001127660 | MFN2         | + | 11962824  | 11996159  |
| chr11 | NM_001143995 | LPXN         | - | 58050919  | 58102215  |
| chr1  | NM_004528    | MGST3        | + | 163867073 | 163891479 |
| chr1  | NM_001170686 | MIB2         | + | 1540657   | 1555853   |
| chr11 | NM_001039469 | MARK2        | + | 63362975  | 63435068  |
| chr1  | NR_029622    | MIR205       | + | 207672100 | 207672210 |
| chr11 | NM_004268    | MED17        | + | 93157052  | 93186144  |
| chr11 | NM_153450    | MED19        | - | 57227762  | 57236249  |
| chr1  | NR_029518    | MIR29B2      | - | 206042410 | 206042491 |
| chr1  | NR_029832    | MIR29C       | - | 206041819 | 206041907 |

|       |              |         |   |           |           |
|-------|--------------|---------|---|-----------|-----------|
| chr11 | NR_031639    | MIR1304 | - | 93106487  | 93106578  |
| chr1  | NR_036070    | MIR3124 | + | 247087198 | 247087265 |
| chr11 | NR_037429    | MIR3656 | + | 118394863 | 118394932 |
| chr1  | NR_036211    | MIR4257 | + | 148791028 | 148791114 |
| chr1  | NR_036213    | MIR4260 | - | 207863411 | 207863478 |
| chr11 | NR_030342    | MIR611  | - | 61316542  | 61316609  |
| chr11 | NR_030343    | MIR612  | + | 64968504  | 64968604  |
| chr11 | NM_001197104 | MLL     | + | 117812414 | 117902749 |
| chr1  | NR_030621    | MIR760  | + | 94084975  | 94085055  |
| chr1  | NR_030281    | MIR92B  | + | 153431591 | 153431687 |
| chr1  | NM_001135553 | MKNK1   | - | 46795676  | 46842553  |
| chr1  | NM_006818    | MLLT11  | + | 149298774 | 149307597 |
| chr1  | NM_015506    | MMACHC  | + | 45738442  | 45749326  |
| chr11 | NM_198275    | MPZL3   | - | 117605545 | 117628221 |
| chr11 | NM_005590    | MRE11A  | - | 93790114  | 93866688  |
| chr1  | NM_024848    | MORN1   | - | 2242555   | 2312853   |
| chr1  | NM_001130079 | MOV10   | + | 113018570 | 113044891 |
| chr1  | NM_001194999 | MR1     | + | 179269183 | 179297697 |
| chr11 | NM_016050    | MRPL11  | - | 65959125  | 65962886  |
| chr1  | NM_017971    | MRPL20  | - | 1327138   | 1332556   |
| chr11 | NM_017840    | MRPL16  | - | 59330183  | 59334921  |
| chr1  | NM_024540    | MRPL24  | - | 154973717 | 154977547 |
| chr11 | NM_022061    | MRPL17  | - | 6658191   | 6661208   |
| chr11 | NM_181514    | MRPL21  | - | 68415321  | 68427879  |
| chr1  | NM_181441    | MRPL55  | - | 226361002 | 226363636 |
| chr1  | NM_031420    | MRPL9   | - | 149998746 | 150002664 |
| chr11 | NM_016055    | MRPL48  | + | 73176564  | 73253304  |
| chr1  | NM_022100    | MRPS14  | - | 173248716 | 173259214 |
| chr11 | NR_037567    | MRPL49  | + | 64646230  | 64651417  |
| chr1  | NM_031280    | MRPS15  | - | 36693948  | 36702627  |
| chr1  | NM_018997    | MRPS21  | + | 148532892 | 148547443 |
| chr1  | NM_016183    | MRTO4   | + | 19450661  | 19459209  |
| chr1  | NM_002440    | MSH4    | + | 76035217  | 76151511  |
| chr1  | NR_027504    | MST1P2  | + | 16844655  | 16849502  |
| chr1  | NM_018116    | MSTO1   | + | 153846630 | 153851382 |
| chr1  | NR_024117    | MSTO2P  | + | 153982232 | 153987993 |
| chr1  | NM_005955    | MTF1    | - | 38047825  | 38097879  |
| chr1  | NM_001164391 | MTF2    | + | 93317379  | 93377226  |
| chr1  | NM_005957    | MTHFR   | - | 11768373  | 11788747  |
| chr1  | NM_004958    | MTOR    | - | 11089174  | 11245195  |
| chr11 | NM_004739    | MTA2    | - | 62117250  | 62125879  |
| chr11 | NM_014342    | MTCH2   | - | 47595433  | 47620782  |
| chr1  | NM_024544    | MUL1    | - | 20698527  | 20707261  |
| chr1  | NM_001048171 | MUTYH   | - | 45567500  | 45578729  |
| chr1  | NM_012333    | MYCBP   | - | 39100748  | 39111637  |
| chr11 | NM_025128    | MUS81   | + | 65384447  | 65390490  |
| chr1  | NM_017940    | NBPF1   | - | 16762998  | 16812569  |

|       |              |            |   |           |           |
|-------|--------------|------------|---|-----------|-----------|
| chr11 | NM_005969    | NAP1L4     | - | 2922235   | 2970183   |
| chr11 | NM_001144030 | NAT10      | + | 34083686  | 34125034  |
| chr11 | NM_015261    | NCAPD3     | - | 133527546 | 133599636 |
| chr1  | NM_032264    | NBPF3      | + | 21639217  | 21683980  |
| chr11 | NM_004551    | NDUFS3     | + | 47557137  | 47562691  |
| chr11 | NM_001166102 | NDUFV1     | + | 67130898  | 67136588  |
| chr1  | NM_001014839 | NCDN       | + | 35795979  | 35804967  |
| chr1  | NR_027285    | NCRNA00292 | - | 211096568 | 211098103 |
| chr1  | NM_015331    | NCSTN      | + | 158579686 | 158595366 |
| chr1  | NM_001184979 | NDUFS5     | + | 39264553  | 39272895  |
| chr1  | NM_001145277 | NECAP2     | + | 16639753  | 16659171  |
| chr11 | NM_002519    | NPAT       | - | 107533327 | 107598575 |
| chr11 | NM_001130102 | NR1H3      | + | 47227024  | 47246977  |
| chr1  | NM_002497    | NEK2       | - | 209902744 | 209915590 |
| chr1  | NM_001142587 | NFYC       | + | 40929828  | 41009862  |
| chr11 | NM_001081491 | NXF1       | - | 62316173  | 62329540  |
| chr1  | NM_020448    | NIPAL3     | + | 24614831  | 24672060  |
| chr1  | NM_001185092 | NIT1       | + | 159354485 | 159361859 |
| chr1  | NM_022787    | NMNAT1     | + | 9926072   | 9968143   |
| chr1  | NM_024654    | NOL9       | - | 6503993   | 6537245   |
| chr1  | NM_001101662 | NRD1       | - | 52027453  | 52117197  |
| chr1  | NM_001042549 | NSL1       | - | 210966117 | 211031762 |
| chr1  | NM_199044    | NSUN4      | + | 46578976  | 46603277  |
| chr1  | NM_032324    | NTPCR      | + | 231152992 | 231180842 |
| chr1  | NM_001007792 | NTRK1      | + | 155052165 | 155118266 |
| chr1  | NM_030952    | NUAK2      | - | 203537813 | 203557506 |
| chr1  | NM_006600    | NUDC       | + | 27120810  | 27145474  |
| chr1  | NM_031423    | NUF2       | + | 161558346 | 161592177 |
| chr1  | NM_018230    | NUP133     | - | 227643666 | 227710711 |
| chr1  | NM_002533    | NVL        | - | 222481658 | 222584495 |
| chr1  | NM_001190818 | ORC1       | - | 52611088  | 52642731  |
| chr1  | NM_145047    | OSCP1      | - | 36656093  | 36688673  |
| chr1  | NM_020205    | OTUD7B     | - | 148178855 | 148249310 |
| chr1  | NM_000437    | PAFAH2     | - | 26158844  | 26197235  |
| chr1  | NM_001123377 | PARK7      | + | 7944300   | 7967929   |
| chr1  | NM_152268    | PARS2      | - | 54995158  | 55002814  |
| chr1  | NM_005764    | PDZK1IP1   | - | 47421847  | 47428358  |
| chr1  | NM_012392    | PEF1       | - | 31868049  | 31883425  |
| chr1  | NM_003846    | PEX11B     | + | 144227521 | 144235089 |
| chr1  | NM_001193644 | PEX19      | - | 158513222 | 158521565 |
| chr1  | NM_012394    | PFDN2      | - | 159336969 | 159354490 |
| chr1  | NM_001017434 | PGBD2      | + | 247167064 | 247179968 |
| chr1  | NM_002631    | PGD        | + | 10381671  | 10402788  |
| chr11 | NM_153451    | ORAOV1     | - | 69189512  | 69199346  |
| chr1  | NM_001198774 | PI4KB      | - | 149530896 | 149566815 |
| chr1  | NM_006099    | PIAS3      | + | 144287344 | 144297903 |
| chr11 | NM_025155    | PAAF1      | + | 73265680  | 73316427  |

|       |              |            |   |           |           |
|-------|--------------|------------|---|-----------|-----------|
| chr1  | NM_002642    | PIGC       | - | 170677219 | 170679853 |
| chr1  | NM_145167    | PIGM       | - | 158264085 | 158268407 |
| chr11 | NM_001184748 | PAFAH1B2   | + | 116520209 | 116552802 |
| chr1  | NM_017837    | PIGV       | + | 26987072  | 26997474  |
| chr1  | NM_001135636 | PIP5K1A    | + | 149437644 | 149488631 |
| chr11 | NM_152716    | PATL1      | - | 59160767  | 59193087  |
| chr11 | NM_004813    | PEX16      | - | 45887795  | 45896250  |
| chr11 | NR_027014    | PGAP2      | + | 3775529   | 3804158   |
| chr1  | NM_001199653 | PMF1       | + | 154449402 | 154476492 |
| chr1  | NM_006556    | PMVK       | - | 153163831 | 153176108 |
| chr11 | NM_020901    | PHRF1      | + | 566482    | 602222    |
| chr1  | NM_017542    | POGK       | + | 165075347 | 165090333 |
| chr11 | NM_001082619 | PIH1D2     | - | 111439943 | 111450105 |
| chr1  | NM_032305    | POLR3GL    | - | 144167592 | 144181744 |
| chr1  | NM_001077447 | PPCS       | + | 42694759  | 42698673  |
| chr11 | NM_002689    | POLA2      | + | 64786007  | 64821664  |
| chr1  | NM_006347    | PPIH       | + | 42896634  | 42915016  |
| chr11 | NM_016147    | PPME1      | + | 73560015  | 73643396  |
| chr1  | NM_000309    | PPOX       | + | 159402804 | 159407634 |
| chr1  | NM_016076    | PPPDE1     | + | 242882974 | 242938957 |
| chr11 | NM_005040    | PRCP       | - | 82213056  | 82289205  |
| chr1  | NM_001040125 | PQLC2      | + | 19511326  | 19528381  |
| chr11 | NM_020228    | PRDM10     | - | 129274810 | 129377940 |
| chr11 | NM_012094    | PRDX5      | + | 63842144  | 63845859  |
| chr11 | NM_001145166 | PRMT3      | + | 20365651  | 20487455  |
| chr11 | NM_014502    | PRPF19     | - | 60414595  | 60430637  |
| chr11 | NM_002804    | PSMC3      | - | 47396895  | 47404600  |
| chr11 | NM_002817    | PSMD13     | + | 226807    | 242984    |
| chr1  | NM_005973    | PRCC       | + | 155003897 | 155037233 |
| chr11 | NM_000317    | PTS        | + | 111602297 | 111609905 |
| chr1  | NM_004905    | PRDX6      | + | 171713108 | 171724569 |
| chr11 | NM_030981    | RAB1B      | + | 65792631  | 65801539  |
| chr11 | NM_014488    | RAB30      | - | 82370125  | 82460532  |
| chr1  | NM_005399    | PRKAB2     | - | 145093308 | 145110753 |
| chr11 | NM_004584    | RAD9A      | + | 66915998  | 66922459  |
| chr1  | NM_032864    | PRPF38A    | + | 52642806  | 52656580  |
| chr1  | NM_018061    | PRPF38B    | + | 109036454 | 109045945 |
| chr11 | NM_001198836 | RBM14      | + | 66140628  | 66153973  |
| chr11 | NM_001198845 | RBM14-RBM4 | + | 66140628  | 66170520  |
| chr11 | NM_001198844 | RBM4       | + | 66162663  | 66192434  |
| chr11 | NM_016090    | RBM7       | + | 113776593 | 113784845 |
| chr1  | NM_021222    | PRUNE      | + | 149247596 | 149274813 |
| chr11 | NM_001032279 | RCE1       | + | 66367458  | 66370579  |
| chr1  | NM_001199774 | PSMA5      | - | 109743175 | 109770631 |
| chr11 | NM_002901    | RCN1       | + | 32069052  | 32083848  |
| chr1  | NM_002810    | PSMD4      | + | 149493820 | 149506578 |
| chr1  | NM_001005290 | PSRC1      | - | 109623698 | 109627313 |

|       |              |          |   |           |           |
|-------|--------------|----------|---|-----------|-----------|
| chr11 | NM_001145138 | RELA     | - | 65177642  | 65187019  |
| chr11 | NM_015523    | REXO2    | + | 113815317 | 113826210 |
| chr11 | NM_021932    | RIC8A    | + | 198529    | 205110    |
| chr11 | NM_004292    | RIN1     | - | 65856117  | 65860576  |
| chr11 | NM_018320    | RNF121   | + | 71317415  | 71386291  |
| chr1  | NM_013328    | PYCR2    | - | 224174202 | 224178588 |
| chr1  | NM_138300    | PYGO2    | - | 153196125 | 153200882 |
| chr1  | NM_001004128 | QSOX1    | + | 178390590 | 178433792 |
| chr11 | NM_003952    | RPS6KB2  | + | 66952510  | 66959455  |
| chr11 | NM_001144827 | RPUUSD4  | - | 125577198 | 125586797 |
| chr1  | NM_004578    | RAB4A    | + | 227473501 | 227507141 |
| chr11 | NM_015324    | RRP8     | - | 6577727   | 6581387   |
| chr1  | NM_001135662 | RAB7L1   | - | 204003736 | 204011233 |
| chr11 | NM_201428    | RTN3     | + | 63205497  | 63283939  |
| chr1  | NM_002871    | RABIF    | - | 201114708 | 201124886 |
| chr11 | NM_005146    | SART1    | + | 65485735  | 65504183  |
| chr1  | NM_001135255 | RBBP4    | + | 32889335  | 32924399  |
| chr1  | NM_001193272 | RBBP5    | - | 203321892 | 203357773 |
| chr1  | NM_001201545 | RBM15    | + | 110683467 | 110690826 |
| chr1  | NM_015014    | RBM34    | - | 233361120 | 233391194 |
| chr1  | NM_005105    | RBM8A    | + | 144218994 | 144222801 |
| chr11 | NM_017841    | SDHAF2   | + | 60954172  | 60970815  |
| chr1  | NM_007033    | RER1     | + | 2313073   | 2326743   |
| chr11 | NM_003002    | SDHD     | + | 111462780 | 111471728 |
| chr11 | NM_006842    | SF3B2    | + | 65576391  | 65592958  |
| chr11 | NM_001017524 | SIRT3    | - | 205029    | 226362    |
| chr1  | NM_006912    | RIT1     | - | 154134224 | 154147801 |
| chr1  | NM_012421    | RLF      | + | 40399627  | 40479180  |
| chr1  | NM_014455    | RNF115   | + | 144322392 | 144400133 |
| chr11 | NM_001077241 | SLC25A45 | - | 64899238  | 64906718  |
| chr1  | NM_001010858 | RNF187   | + | 226741690 | 226750512 |
| chr1  | NM_001127361 | RNF19B   | - | 33174636  | 33202873  |
| chr11 | NM_152313    | SLC36A4  | - | 92520497  | 92570743  |
| chr11 | NM_001164277 | SLC37A4  | - | 118400270 | 118406826 |
| chr11 | NM_001128225 | SLC39A13 | + | 47386621  | 47394627  |
| chr1  | NR_004407    | RNU11    | + | 28847698  | 28847833  |
| chr11 | NM_001012662 | SLC3A2   | + | 62380059  | 62412931  |
| chr1  | NM_001145264 | ROBLD3   | + | 154291140 | 154294925 |
| chr1  | NM_002946    | RPA2     | - | 28090635  | 28113823  |
| chr1  | NM_025065    | RPF1     | + | 84717507  | 84736621  |
| chr1  | NM_000983    | RPL22    | - | 6167666   | 6182266   |
| chr11 | NR_002959    | SNORA18  | - | 93106279  | 93106411  |
| chr1  | NM_015203    | RPRD2    | + | 148603613 | 148715665 |
| chr11 | NR_002580    | SNORA3   | + | 8662349   | 8662479   |
| chr11 | NR_002973    | SNORA40  | - | 93107923  | 93108050  |
| chr11 | NR_004390    | SNORA57  | + | 62189469  | 62189618  |
| chr11 | NR_000005    | SNORD15A | + | 74789082  | 74789230  |

|       |              |          |   |           |           |
|-------|--------------|----------|---|-----------|-----------|
| chr1  | NM_001142560 | RRNAD1   | + | 154964886 | 154973376 |
| chr1  | NM_016052    | RRP15    | + | 216525251 | 216577948 |
| chr11 | NR_002565    | SNORD25  | - | 62379612  | 62379679  |
| chr1  | NM_018364    | RSBN1    | - | 114105976 | 114156593 |
| chr11 | NR_002564    | SNORD26  | - | 62379339  | 62379414  |
| chr11 | NR_002563    | SNORD27  | - | 62379059  | 62379131  |
| chr11 | NR_002562    | SNORD28  | - | 62378668  | 62378743  |
| chr11 | NR_002561    | SNORD30  | - | 62377710  | 62377780  |
| chr11 | NR_003033    | SNORD5   | - | 93106041  | 93106114  |
| chr1  | NM_006271    | S100A1   | + | 151867496 | 151871137 |
| chr11 | NM_014758    | SNX19    | - | 130250975 | 130291592 |
| chr1  | NM_005621    | S100A12  | - | 151612807 | 151614699 |
| chr1  | NM_001024210 | S100A13  | - | 151857899 | 151873192 |
| chr1  | NM_005978    | S100A2   | - | 151800208 | 151804930 |
| chr11 | NM_014752    | SPCS2    | + | 74337939  | 74367724  |
| chr11 | NM_194285    | SPTY2D1  | - | 18584523  | 18612596  |
| chr1  | NM_002965    | S100A9   | + | 151596953 | 151600127 |
| chr1  | NM_022753    | S100PBP  | + | 33055762  | 33097063  |
| chr11 | NM_017857    | SSH3     | + | 66827494  | 66836654  |
| chr11 | NM_006396    | SSSCA1   | + | 65094518  | 65095815  |
| chr1  | NM_006513    | SARS     | + | 109558037 | 109582327 |
| chr1  | NM_194292    | SASS6    | - | 100321689 | 100371099 |
| chr1  | NM_005698    | SCAMP3   | - | 153492393 | 153498819 |
| chr11 | NM_006645    | STARD10  | - | 72143421  | 72182398  |
| chr11 | NM_006819    | STIP1    | + | 63710162  | 63728596  |
| chr11 | NM_152713    | STT3A    | + | 124967948 | 124996490 |
| chr1  | NM_024041    | SCNM1    | + | 149405140 | 149408238 |
| chr11 | NM_003164    | STX5     | - | 62330944  | 62356136  |
| chr1  | NM_020423    | SCYL3    | - | 168088427 | 168129700 |
| chr1  | NM_016176    | SDF4     | - | 1142150   | 1157310   |
| chr1  | NM_001035511 | SDHC     | + | 159550789 | 159601159 |
| chr11 | NM_032431    | SYVN1    | - | 64651326  | 64658579  |
| chr1  | NM_001018067 | SERBP1   | - | 67646080  | 67668711  |
| chr11 | NM_032811    | TBRG1    | + | 123997951 | 124011032 |
| chr1  | NM_031459    | SES2     | + | 28458592  | 28481589  |
| chr1  | NM_001145415 | SETDB1   | + | 149165438 | 149203844 |
| chr1  | NM_006802    | SF3A3    | - | 38195238  | 38228348  |
| chr1  | NM_005850    | SF3B4    | - | 148161834 | 148166326 |
| chr1  | NM_199344    | SFT2D2   | + | 166461878 | 166478712 |
| chr11 | NM_001037304 | THYN1    | - | 133623382 | 133628470 |
| chr11 | NM_012456    | TIMM10   | - | 57052511  | 57054808  |
| chr1  | NM_001103160 | SH2D5    | - | 20918811  | 20931720  |
| chr1  | NM_030645    | SH3BP5L  | - | 247071273 | 247086777 |
| chr11 | NM_024092    | TMEM109  | + | 60437946  | 60447491  |
| chr1  | NM_016009    | SH3GLB1  | + | 86942844  | 86986455  |
| chr1  | NM_001130041 | SHC1     | - | 153201397 | 153213583 |
| chr11 | NM_032273    | TMEM126A | + | 85036610  | 85045245  |



|       |              |             |   |           |           |
|-------|--------------|-------------|---|-----------|-----------|
| chr11 | NM_001193537 | TMEM126B    | + | 85017269  | 85025231  |
| chr1  | NM_001102396 | SIKE1       | - | 115113627 | 115124831 |
| chr11 | NM_016464    | TMEM138     | + | 60886048  | 60893551  |
| chr11 | NM_199337    | TMEM179B    | + | 62311449  | 62314448  |
| chr1  | NM_003051    | SLC16A1     | - | 113255992 | 113300498 |
| chr1  | NM_006996    | SLC19A2     | - | 167699772 | 167721832 |
| chr11 | NR_028491    | TMEM41B     | - | 9258777   | 9292872   |
| chr11 | NM_001042463 | TMEM80      | + | 685615    | 694129    |
| chr11 | NM_020644    | TMEM9B      | - | 8925415   | 8942565   |
| chr1  | NM_014655    | SLC25A44    | + | 154430353 | 154449211 |
| chr11 | NM_001144012 | TMX2        | + | 57236570  | 57265021  |
| chr1  | NM_006516    | SLC2A1      | - | 43163632  | 43197434  |
| chr11 | NR_037646    | TMX2-CTNND1 | + | 57236570  | 57343228  |
| chr11 | NM_019009    | TOLLIP      | - | 1252173   | 1287468   |
| chr1  | NM_012243    | SLC35A3     | + | 100208127 | 100261594 |
| chr11 | NM_004620    | TRAF6       | - | 36467298  | 36488398  |
| chr11 | NM_016146    | TRAPPC4     | + | 118394450 | 118399594 |
| chr1  | NM_014437    | SLC39A1     | - | 152198211 | 152206812 |
| chr1  | NM_001122837 | SLC50A1     | + | 153374911 | 153377958 |
| chr11 | NM_017583    | TRIM44      | + | 35640928  | 35787506  |
| chr1  | NM_015327    | SMG5        | - | 154485638 | 154519244 |
| chr1  | NM_001174061 | SMG7        | + | 181708128 | 181789951 |
| chr1  | NM_053052    | SNAP47      | + | 225989319 | 226035555 |
| chr11 | NM_006292    | TSG101      | - | 18458433  | 18505065  |
| chr1  | NR_002956    | SNORA14B    | - | 233357740 | 233357875 |
| chr1  | NR_003035    | SNORA16A    | - | 28780018  | 28780152  |
| chr11 | NM_001025238 | TSPAN4      | + | 832823    | 857116    |
| chr1  | NR_002976    | SNORA44     | - | 28779479  | 28779611  |
| chr11 | NM_173810    | TTC9C       | + | 62252527  | 62262684  |
| chr11 | NM_022830    | TUT1        | - | 62099092  | 62115685  |
| chr1  | NR_001456    | SNORD38A    | + | 45016100  | 45016171  |
| chr11 | NM_004788    | UBE4A       | + | 117735511 | 117775136 |
| chr1  | NR_002750    | SNORD44     | - | 172101728 | 172101789 |
| chr11 | NM_015853    | UBXN1       | - | 62200547  | 62203103  |
| chr1  | NR_003042    | SNORD45C    | + | 76025344  | 76025422  |
| chr1  | NR_000024    | SNORD46     | + | 45014750  | 45014848  |
| chr1  | NR_002746    | SNORD47     | - | 172100129 | 172100206 |
| chr11 | NM_001040697 | UEVLD       | - | 18509819  | 18566857  |
| chr1  | NR_000015    | SNORD55     | + | 45014123  | 45014197  |
| chr1  | NR_002579    | SNORD74     | - | 172103434 | 172103506 |
| chr1  | NR_003941    | SNORD75     | - | 172102639 | 172102699 |
| chr1  | NR_003942    | SNORD76     | - | 172102395 | 172102476 |
| chr1  | NR_003943    | SNORD77     | - | 172102071 | 172102132 |
| chr11 | NM_020798    | USP35       | + | 77577505  | 77603405  |
| chr1  | NR_003944    | SNORD78     | - | 172101393 | 172101447 |
| chr1  | NR_003939    | SNORD79     | - | 172101110 | 172101191 |
| chr1  | NR_003940    | SNORD80     | - | 172100593 | 172100664 |

|       |              |            |   |           |           |
|-------|--------------|------------|---|-----------|-----------|
| chr1  | NR_003938    | SNORD81    | - | 172099935 | 172099978 |
| chr11 | NM_021729    | VPS11      | + | 118443702 | 118457898 |
| chr11 | NM_052875    | VPS26B     | + | 133599770 | 133622896 |
| chr1  | NM_003094    | SNRPE      | + | 202097362 | 202106903 |
| chr11 | NM_018093    | WDR74      | - | 62356958  | 62364204  |
| chr11 | NM_182969    | XRRA1      | - | 74229602  | 74337880  |
| chr1  | NM_138796    | SPATA17    | + | 215871317 | 216107107 |
| chr11 | NM_020470    | YIF1A      | - | 65808626  | 65813214  |
| chr1  | NM_015001    | SPEN       | + | 16046945  | 16139537  |
| chr11 | NM_001143667 | ZBED5      | - | 10830826  | 10836196  |
| chr11 | NM_024784    | ZBTB3      | - | 62275010  | 62278232  |
| chr11 | NM_207340    | ZDHHC24    | - | 66063310  | 66070247  |
| chr11 | NM_015457    | ZDHHC5     | + | 57192049  | 57225235  |
| chr11 | NM_001197051 | ZFP91      | + | 58103162  | 58145599  |
| chr11 | NR_024091    | ZFP91-CNTF | + | 58103162  | 58149781  |
| chr11 | NM_006782    | ZFPL1      | + | 64608269  | 64612450  |
| chr11 | NM_003442    | ZNF143     | + | 9439087   | 9506647   |
| chr11 | NM_024741    | ZNF408     | + | 46678892  | 46684042  |
| chr1  | NM_001130440 | SRP9       | + | 224032137 | 224044791 |
| chr1  | NM_005839    | SRRM1      | + | 24842180  | 24872359  |
| chr11 | NM_004724    | ZW10       | - | 113109118 | 113149635 |
| chr1  | NM_001191006 | SRSF10     | - | 24165523  | 24179540  |
| chr1  | NM_001190987 | SRSF11     | + | 70443952  | 70490289  |
| chr1  | NM_005626    | SRSF4      | - | 29346836  | 29381224  |
| chr12 | NM_001173466 | AAAS       | - | 51987506  | 52001679  |
| chr1  | NM_003145    | SSR2       | - | 154245462 | 154257382 |
| chr1  | NM_014188    | SSU72      | - | 1466915   | 1500125   |
| chr12 | NM_203444    | ABCB9      | - | 121979491 | 122025705 |
| chr12 | NM_001136538 | ACAD10     | + | 110608239 | 110679294 |
| chr1  | NM_017744    | ST7L       | - | 112867663 | 112963563 |
| chr1  | NM_177424    | STX12      | + | 27972280  | 28023550  |
| chr12 | NM_022496    | ACTR6      | + | 99118704  | 99142332  |
| chr1  | NM_005819    | STX6       | - | 179208798 | 179258669 |
| chr1  | NM_007269    | STXBP3     | + | 109090807 | 109153671 |
| chr1  | NM_001105518 | SWT1       | + | 183392814 | 183527536 |
| chr1  | NM_015484    | SYF2       | - | 25421353  | 25431600  |
| chr12 | NM_001013620 | ALG10B     | + | 36996823  | 37009795  |
| chr12 | NM_001001655 | ALKBH2     | - | 108010375 | 108015676 |
| chr1  | NM_001193308 | SYTL1      | + | 27541069  | 27553010  |
| chr1  | NM_001135218 | TAF12      | - | 28802195  | 28842191  |
| chr12 | NM_001113402 | AMN1       | - | 31715337  | 31773375  |
| chr1  | NM_005645    | TAF13      | - | 109408520 | 109420147 |
| chr1  | NM_001201536 | TAF1A      | - | 220797866 | 220829898 |
| chr12 | NM_016238    | ANAPC7     | - | 109295087 | 109325918 |
| chr12 | NM_033121    | ANKRD13A   | + | 108921617 | 108961618 |
| chr1  | NM_007375    | TARDBP     | + | 10995265  | 11008136  |
| chr1  | NM_025150    | TARS2      | + | 148726543 | 148746373 |

|       |              |              |   |           |           |
|-------|--------------|--------------|---|-----------|-----------|
| chr1  | NM_001042552 | TATDN3       | + | 211031792 | 211056790 |
| chr1  | NM_001079515 | TBCE         | + | 233597350 | 233678903 |
| chr1  | NM_153035    | TCEANC2      | + | 54291861  | 54338004  |
| chr1  | NM_003198    | TCEB3        | + | 23942442  | 23961136  |
| chr12 | NM_001177    | ARL1         | - | 100311033 | 100325703 |
| chr12 | NM_005719    | ARPC3        | - | 109357088 | 109372541 |
| chr12 | NM_024095    | ASB8         | - | 46827838  | 46837644  |
| chr1  | NM_022366    | TFB2M        | - | 244770485 | 244796188 |
| chr12 | NM_005171    | ATF1         | + | 49444055  | 49501210  |
| chr1  | NM_053055    | THEM4        | - | 150112683 | 150148737 |
| chr12 | NM_001686    | ATP5B        | - | 55318225  | 55326119  |
| chr1  | NM_006335    | TIMM17A      | + | 200191241 | 200206412 |
| chr1  | NM_152902    | TIPRL        | + | 166414794 | 166437975 |
| chr12 | NM_002973    | ATXN2        | - | 110374400 | 110521863 |
| chr1  | NM_019026    | TMCO1        | - | 163960151 | 164004759 |
| chr12 | NM_013449    | BAZ2A        | - | 55275646  | 55316430  |
| chr1  | NM_001167830 | TMED5        | - | 93387886  | 93418834  |
| chr12 | NM_024685    | BBS10        | - | 75262396  | 75266353  |
| chr1  | NM_020141    | TMEM167B     | + | 109434925 | 109441077 |
| chr1  | NM_138391    | TMEM183A     | + | 201243156 | 201259820 |
| chr1  | NM_001079809 | TMEM183B     | + | 201243158 | 201259291 |
| chr1  | NM_018252    | TMEM206      | - | 210604438 | 210654890 |
| chr1  | NM_032125    | TMEM222      | + | 27521222  | 27535478  |
| chr12 | NM_001487    | BLOC1S1      | + | 54396084  | 54399758  |
| chr1  | NM_018056    | TMEM39B      | + | 32311089  | 32341054  |
| chr12 | NR_037658    | BLOC1S1-RDH5 | + | 54396084  | 54404793  |
| chr1  | NM_001168551 | TMEM48       | - | 54003721  | 54076813  |
| chr12 | NM_006768    | BRAP         | - | 110564332 | 110608173 |
| chr1  | NM_014313    | TMEM50A      | + | 25537397  | 25561439  |
| chr12 | NM_021640    | C12orf10     | + | 51979736  | 51987232  |
| chr12 | NM_018164    | C12orf11     | - | 26949378  | 26982521  |
| chr12 | NM_013300    | C12orf24     | + | 109390614 | 109412575 |
| chr12 | NM_032230    | C12orf26     | + | 81276406  | 81397147  |
| chr1  | NM_004872    | TMEM59       | - | 54269936  | 54291699  |
| chr12 | NR_027363    | C12orf32     | + | 2856625   | 2868887   |
| chr1  | NM_016486    | TMEM69       | + | 45926433  | 45932695  |
| chr1  | NR_026678    | TMEM79       | + | 154519327 | 154528858 |
| chr12 | NM_020374    | C12orf4      | - | 4467161   | 4517898   |
| chr12 | NM_017822    | C12orf41     | - | 47333261  | 47362302  |
| chr12 | NM_001098673 | C12orf44     | + | 50750024  | 50757546  |
| chr12 | NM_017915    | C12orf48     | + | 101038085 | 101115428 |
| chr12 | NM_020375    | C12orf5      | + | 4300619   | 4339451   |
| chr12 | NM_032848    | C12orf52     | + | 112107937 | 112114502 |
| chr1  | NM_014765    | TOMM20       | - | 233339280 | 233358879 |
| chr12 | NM_175874    | C12orf60     | + | 14847772  | 14868058  |
| chr1  | NM_015602    | TOR1AIP1     | + | 178118042 | 178155834 |
| chr12 | NM_032901    | C12orf62     | + | 48792166  | 48800501  |

|       |              |          |   |           |           |
|-------|--------------|----------|---|-----------|-----------|
| chr1  | NM_001199260 | TOR1AIP2 | - | 178075724 | 178113564 |
| chr1  | NM_022371    | TOR3A    | + | 177317734 | 177331752 |
| chr12 | NM_152269    | C12orf65 | + | 122283796 | 122308459 |
| chr1  | NM_001031685 | TP53BP2  | - | 222034217 | 222100297 |
| chr12 | NM_152440    | C12orf66 | - | 62872685  | 62902343  |
| chr1  | NM_003292    | TPR      | - | 184547408 | 184611080 |
| chr1  | NM_014408    | TRAPPC3  | - | 36374759  | 36387654  |
| chr12 | NM_001135570 | C12orf73 | - | 102868110 | 102875123 |
| chr1  | NM_025058    | TRIM46   | + | 153412983 | 153424069 |
| chr12 | NM_001733    | C1R      | - | 7057769   | 7136184   |
| chr1  | NM_001202423 | TRMT1L   | - | 183353840 | 183392853 |
| chr1  | NM_017846    | TRNAU1AP | + | 28752115  | 28777644  |
| chr1  | NM_001042369 | TROVE2   | + | 191295626 | 191327529 |
| chr12 | NM_020898    | CALCOCO1 | - | 52391168  | 52407574  |
| chr1  | NM_001127394 | TSEN15   | + | 182287433 | 182309967 |
| chr12 | NM_018448    | CAND1    | + | 65949327  | 65994655  |
| chr1  | NM_005999    | TSNAX    | + | 229731021 | 229768892 |
| chr12 | NM_032606    | CAPS2    | - | 73956025  | 74010103  |
| chr12 | NM_012117    | CBX5     | - | 52910996  | 52960182  |
| chr1  | NM_001122835 | TTC13    | - | 229108609 | 229181241 |
| chr12 | NR_033192    | CCDC59   | - | 81270213  | 81276715  |
| chr1  | NM_004623    | TTC4     | + | 54954082  | 54980916  |
| chr1  | NM_003594    | TTF2     | + | 117404471 | 117447014 |
| chr12 | NM_001130147 | CCDC77   | + | 368776    | 422067    |
| chr1  | NM_175852    | TXLNA    | + | 32417931  | 32436473  |
| chr1  | NM_015913    | TXNDC12  | - | 52258391  | 52293635  |
| chr1  | NM_001162916 | TYW3     | + | 74971423  | 75004948  |
| chr12 | NM_001240    | CCNT1    | - | 47373018  | 47397048  |
| chr1  | NM_003115    | UAP1     | + | 160797919 | 160836257 |
| chr12 | NM_006431    | CCT2     | + | 68265474  | 68281624  |
| chr1  | NM_014847    | UBAP2L   | + | 152459948 | 152509953 |
| chr1  | NM_017582    | UBE2Q1   | - | 152787674 | 152797744 |
| chr1  | NM_014176    | UBE2T    | - | 200567407 | 200577717 |
| chr1  | NM_001105562 | UBE4B    | + | 10015627  | 10163883  |
| chr12 | NM_000075    | CDK4     | - | 56428269  | 56432431  |
| chr1  | NM_001199261 | UCHL5    | - | 191248118 | 191295146 |
| chr12 | NM_025114    | CEP290   | - | 86966920  | 87060124  |
| chr1  | NM_016406    | UFC1     | + | 159390157 | 159395270 |
| chr12 | NM_001161344 | CHFR     | - | 131927010 | 131974277 |
| chr1  | NM_006004    | UQCRH    | + | 46541966  | 46555034  |
| chr1  | NM_000374    | UROD     | + | 45250391  | 45253928  |
| chr1  | NM_007122    | USF1     | - | 159275664 | 159282381 |
| chr1  | NM_001017415 | USP1     | + | 62674562  | 62690063  |
| chr1  | NM_001014443 | USP21    | + | 159395877 | 159402140 |
| chr1  | NM_032236    | USP48    | - | 21877378  | 21982275  |
| chr1  | NM_016037    | UTP11L   | + | 38250970  | 38263084  |
| chr1  | NM_001185127 | VAMP4    | - | 169935918 | 169978002 |

|       |              |          |         |           |           |
|-------|--------------|----------|---------|-----------|-----------|
| chr12 | NM_014255    | CNPY2    | -       | 54990479  | 54996395  |
| chr12 | NM_001164094 | COP57A   | +       | 6703410   | 6711302   |
| chr1  | NM_015836    | WARS2    | -       | 119375361 | 119484818 |
| chr12 | NM_032314    | COQ5     | -       | 119425464 | 119451347 |
| chr12 | NM_004373    | COX6A1   | +       | 119360286 | 119362912 |
| chr1  | NM_006784    | WDR3     | +       | 118273894 | 118304572 |
| chr1  | NM_001195831 | WDR65    | +       | 43410587  | 43492616  |
| chr12 | NM_001310    | CREBL2   | +       | 12656097  | 12689308  |
| chr1  | NM_024102    | WDR77    | -       | 111784034 | 111793353 |
| chr12 | NM_004075    | CRY1     | -       | 105909271 | 106011728 |
| chr1  | NM_024763    | WDR78    | -       | 67051159  | 67163158  |
| chr12 | NM_004077    | CS       | -       | 54951749  | 54980442  |
| chr12 | NM_015989    | CSAD     | -       | 51837713  | 51860697  |
| chr1  | NM_018053    | XKR8     | +       | 28159090  | 28167191  |
| chr1  | NM_004559    | YBX1     | +       | 42920652  | 42940607  |
| chr1  | NM_001198906 | YY1AP1   | -       | 153895856 | 153925447 |
| chr12 | NM_004818    | DDX23    | -       | 47509805  | 47532224  |
| chr12 | NM_016355    | DDX47    | +       | 12857546  | 12874182  |
| chr1  | NM_003443    | ZBTB17   | -       | 16140950  | 16175214  |
| chr12 | NM_175066    | DDX51    | -       | 131187092 | 131194833 |
| chr1  | NM_001122770 | ZBTB37   | +       | 172104115 | 172122397 |
| chr12 | NM_001111322 | DDX54    | -       | 112079360 | 112107667 |
| chr12 | NM_020936    | DDX55    | +       | 122652624 | 122671435 |
| chr1  | NM_194314    | ZBTB41   | -       | 195389436 | 195436295 |
| chr1  | NM_005341    | ZBTB48   | +       | 6562649   | 6571927   |
| chr12 | NM_003677    | DENR     | +       | 121803323 | 121821906 |
| chr12 | NM_152317    | DEPDC4   | -       | 99170172  | 99184988  |
| chr1  | NM_178547    | ZBTB8OS  | -       | 32859893  | 32888772  |
| chr12 | NM_032364    | DNAJC14  | -       | 54501010  | 54509687  |
| chr1  | NM_005857    | ZMPSTE24 | +       | 40496319  | 40532443  |
| chr12 | NM_005690    | DNM1L    | +       | 32723403  | 32789851  |
| chr1  | NM_024772    | ZMYM1    | +       | 35317558  | 35354042  |
| chr1  | NM_001146192 | ZMYND12  | -       | 42668587  | 42694525  |
| chr1  | NM_182976    | ZNF326   | +       | 90233265  | 90266682  |
| chr12 | NM_001037494 | DYNLL1   | +       | 119392042 | 119420681 |
| chr1  | NM_032752    | ZNF496   | -       | 245530244 | 245561668 |
| chr12 | NM_001414    | EIF2B1   | -       | 122671522 | 122684276 |
| chr1  | NM_033213    | ZNF670   | -       | 245266322 | 245308738 |
| chr12 | NM_006331    | EMG1     | +       | 6950204   | 6955426   |
| chr1  | NM_152373    | ZNF684   | +       | 40769819  | 40786428  |
| chr1  | NM_020832    | ZNF687   | +       | 149521414 | 149531005 |
| chr1  | NM_015911    | ZNF691   | +       | 43084866  | 43090733  |
| chr12 | NM_016570    | ERGIC2   | -       | 29384845  | 29425410  |
| chr1  | NM_001170670 | ZNHIT6   | -       | 85887693  | 85946704  |
| chr12 | NM_001034025 | ERP29    | +       | 110935534 | 110945407 |
| chr1  | NM_005455    | ZRANB2   | -       | 71301561  | 71319560  |
| chr7  | NM_001011553 |          | 7-Sep + | 35807151  | 35911442  |

|       |              |              |   |           |           |
|-------|--------------|--------------|---|-----------|-----------|
| chr7  | NM_005692    | ABCF2        | - | 150535855 | 150555250 |
| chr12 | NM_018351    | FGD6         | - | 93994655  | 94135371  |
| chr12 | NM_001171887 | FGFR1OP2     | + | 26982571  | 27010848  |
| chr7  | NM_018238    | AGK          | + | 140897546 | 141000678 |
| chr7  | NM_006303    | AIMP2        | + | 6015407   | 6029991   |
| chr12 | NM_021953    | FOXM1        | - | 2837109   | 2856564   |
| chr12 | NM_031412    | GABARAPL1    | + | 10256755  | 10266991  |
| chr7  | NM_017621    | ALKBH4       | - | 101883671 | 101892326 |
| chr7  | NM_020319    | ANKMY2       | - | 16605925  | 16651967  |
| chr12 | NM_176818    | GATC         | + | 119368623 | 119385939 |
| chr12 | NM_006836    | GCN1L1       | - | 119049396 | 119116896 |
| chr12 | NM_152436    | GLIPR1L2     | + | 74071155  | 74104087  |
| chr7  | NM_001037164 | ARL4A        | + | 12692976  | 12697081  |
| chr7  | NM_001190996 | ARPC1A       | + | 98761431  | 98801821  |
| chr12 | NR_027249    | GNN          | - | 102761656 | 102848119 |
| chr12 | NM_024312    | GNPTAB       | - | 100663405 | 100748776 |
| chr12 | NM_005895    | GOLGA3       | - | 131855567 | 131915361 |
| chr7  | NM_001003713 | ATP5J2       | - | 98893719  | 98901760  |
| chr12 | NM_016072    | GOLT1B       | + | 21545965  | 21562604  |
| chr7  | NM_001198879 | ATP5J2-PTCD1 | - | 98852297  | 98901760  |
| chr12 | NM_001164372 | GPN3         | - | 109374673 | 109390909 |
| chr7  | NM_001198909 | ATP6V1F      | + | 128290092 | 128293139 |
| chr12 | NM_006143    | GPR19        | - | 12705261  | 12740388  |
| chr12 | NM_003979    | GPRC5A       | + | 12935222  | 12957867  |
| chr7  | NM_032408    | BAZ1B        | - | 72492663  | 72574551  |
| chr7  | NM_001197244 | BCL7B        | - | 72588618  | 72610001  |
| chr7  | NM_005868    | BET1         | - | 93458935  | 93471626  |
| chr12 | NM_001516    | GTF2H3       | + | 122684333 | 122711287 |
| chr12 | NM_001099650 | GXYLT1       | - | 40761914  | 40824940  |
| chr7  | NM_001724    | BPGM         | + | 133982070 | 134015107 |
| chr7  | NM_003910    | BUD31        | + | 98844536  | 98855175  |
| chr7  | NM_138701    | C7orf11      | - | 40138866  | 40140776  |
| chr7  | NR_026865    | C7orf13      | - | 156123820 | 156126109 |
| chr7  | NM_001099858 | C7orf25      | - | 42915396  | 42918214  |
| chr7  | NM_138446    | C7orf30      | + | 23305464  | 23315705  |
| chr7  | NM_020192    | C7orf36      | + | 39572527  | 39579005  |
| chr7  | NR_003697    | C7orf40      | - | 44989151  | 44992784  |
| chr7  | NM_017994    | C7orf42      | + | 66023637  | 66060973  |
| chr12 | NM_001171993 | HPD          | - | 120761815 | 120810900 |
| chr7  | NM_024033    | C7orf49      | - | 134501071 | 134506072 |
| chr7  | NM_197964    | C7orf55      | + | 138676436 | 138681081 |
| chr7  | NM_152556    | C7orf60      | - | 112246437 | 112367168 |
| chr7  | NM_001039706 | C7orf63      | + | 89712423  | 89778313  |
| chr7  | NM_032120    | C7orf64      | + | 91996022  | 92004759  |
| chr12 | NM_001127582 | ING4         | - | 6629964   | 6642569   |
| chr7  | NM_001098786 | C7orf68      | + | 127883119 | 127885708 |
| chr7  | NM_001037163 | C7orf70      | - | 6335564   | 6355115   |

|       |              |           |   |           |           |
|-------|--------------|-----------|---|-----------|-----------|
| chr12 | NM_006390    | IPO8      | - | 30673181  | 30740196  |
| chr12 | NM_014301    | ISCU      | + | 107480423 | 107487289 |
| chr12 | NM_018463    | ITFG2     | + | 2792047   | 2804498   |
| chr7  | NM_006136    | CAPZA2    | + | 116289798 | 116346549 |
| chr7  | NM_032982    | CASP2     | + | 142695429 | 142714911 |
| chr7  | NM_024814    | CBLL1     | + | 107171514 | 107189319 |
| chr12 | NM_031954    | KCTD10    | - | 108370842 | 108399538 |
| chr7  | NM_007276    | CBX3      | + | 26207623  | 26219501  |
| chr12 | NM_001042603 | KDM5A     | - | 259483    | 368881    |
| chr7  | NM_017667    | CCDC132   | + | 92699588  | 92826274  |
| chr12 | NM_014802    | KIAA0528  | - | 22492784  | 22588719  |
| chr12 | NM_015275    | KIAA1033  | + | 104025621 | 104087036 |
| chr12 | NM_020853    | KIAA1467  | + | 13088581  | 13127650  |
| chr7  | NM_001009186 | CCT6A     | + | 56086871  | 56099176  |
| chr7  | NM_003718    | CDK13     | + | 39956483  | 40103258  |
| chr7  | NM_004935    | CDK5      | - | 150381831 | 150385985 |
| chr7  | NM_016139    | CHCHD2    | - | 56136759  | 56141681  |
| chr12 | NM_014708    | KNTC1     | + | 121577761 | 121676900 |
| chr12 | NM_007043    | KRR1      | - | 74177685  | 74191685  |
| chr7  | NM_152755    | CNPY4     | + | 99555200  | 99561064  |
| chr7  | NM_006833    | COPS6     | + | 99524518  | 99527758  |
| chr12 | NM_001170803 | LARP4     | + | 49080858  | 49160055  |
| chr12 | NM_001167614 | LEMD3     | + | 63849617  | 63928408  |
| chr12 | NM_001024668 | LETMD1    | + | 49728350  | 49740474  |
| chr7  | NM_018947    | CYCS      | - | 25124794  | 25131505  |
| chr12 | NM_032338    | LLPH      | - | 64803115  | 64810800  |
| chr7  | NM_001146152 | CYP51A1   | - | 91579398  | 91601995  |
| chr12 | NR_027035    | LOC144486 | + | 93377909  | 93380475  |
| chr7  | NM_001142936 | DAGLB     | - | 6415271   | 6454168   |
| chr7  | NM_001014436 | DBNL      | + | 44050763  | 44067840  |
| chr7  | NM_001127454 | DFNA5     | - | 24704498  | 24764164  |
| chr7  | NM_000108    | DLD       | + | 107318821 | 107348879 |
| chr7  | NM_001142326 | DMTF1     | + | 86619612  | 86663584  |
| chr7  | NM_012328    | DNAJB9    | + | 107997424 | 108002530 |
| chr12 | NR_036476    | LOC440104 | + | 54509658  | 54516297  |
| chr7  | NM_001129887 | DNAJC2    | - | 102740156 | 102772556 |
| chr7  | NM_032317    | DNAJC30   | - | 72733183  | 72735717  |
| chr12 | NR_015382    | LOC678655 | - | 6418427   | 6430944   |
| chr12 | NM_005768    | LPCAT3    | - | 6955607   | 6996103   |
| chr7  | NM_181581    | DUS4L     | + | 106991667 | 107006204 |
| chr7  | NM_001134335 | EIF2AK1   | - | 6028403   | 6065386   |
| chr7  | NM_001037283 | EIF3B     | + | 2360999   | 2386903   |
| chr7  | NM_022170    | EIF4H     | + | 73226641  | 73249365  |
| chr12 | NM_198578    | LRRK2     | + | 38905079  | 39049353  |
| chr12 | NM_000895    | LTA4H     | - | 94918741  | 94953496  |
| chr12 | NM_002342    | LTBR      | + | 6363617   | 6370993   |
| chr12 | NM_002355    | M6PR      | - | 8984230   | 8993519   |

|       |              |           |   |           |           |
|-------|--------------|-----------|---|-----------|-----------|
| chr12 | NM_018048    | MAGOHB    | - | 10647630  | 10657475  |
| chr12 | NM_003668    | MAPKAPK5  | + | 110764661 | 110815611 |
| chr12 | NM_004990    | MARS      | + | 56168002  | 56196705  |
| chr12 | NM_006337    | MCRS1     | - | 48238352  | 48248178  |
| chr12 | NM_006838    | METAP2    | + | 94391952  | 94433744  |
| chr7  | NM_001040057 | FAM133B   | - | 92028007  | 92057642  |
| chr12 | NM_005371    | METTL1    | - | 56448617  | 56452181  |
| chr7  | NM_145111    | FAM200A   | - | 98981858  | 98987693  |
| chr7  | NM_006712    | FASTK     | - | 150404640 | 150408884 |
| chr7  | NM_024963    | FBXL18    | - | 5481953   | 5519925   |
| chr7  | NM_033506    | FBXO24    | + | 100021891 | 100036676 |
| chr7  | NM_001042762 | FIGNL1    | - | 50479325  | 50485582  |
| chr7  | NM_016068    | FIS1      | - | 100669612 | 100675091 |
| chr7  | NR_015392    | FLJ40852  | - | 141050606 | 141084499 |
| chr12 | NR_037425    | MIR3652   | + | 102848332 | 102848463 |
| chr12 | NR_029661    | MIRLET7I  | + | 61283732  | 61283816  |
| chr7  | NM_021167    | GATAD1    | + | 91914700  | 91926678  |
| chr12 | NM_014730    | MLEC      | + | 119609331 | 119624050 |
| chr12 | NR_026581    | MLF2      | - | 6727418   | 6732897   |
| chr7  | NM_015949    | GET4      | + | 882716    | 902597    |
| chr7  | NM_001199815 | GGCT      | - | 30502761  | 30510982  |
| chr12 | NM_016497    | MRPL51    | - | 6471576   | 6472732   |
| chr12 | NM_001190864 | MRPS35    | + | 27754972  | 27800504  |
| chr12 | NM_000431    | MVK       | + | 108495882 | 108519454 |
| chr7  | NM_005273    | GNB2      | + | 100109298 | 100114728 |
| chr12 | NM_024953    | NAA25     | - | 110948875 | 111031018 |
| chr12 | NM_001113202 | NACA      | - | 55392477  | 55405593  |
| chr12 | NM_018838    | NDUFA12   | - | 93889240  | 93921642  |
| chr12 | NM_005002    | NDUFA9    | + | 4628524   | 4666981   |
| chr12 | NM_015509    | NECAP1    | + | 8126073   | 8141640   |
| chr12 | NM_001135176 | NEDD1     | + | 95825131  | 95871600  |
| chr7  | NM_001042717 | GTPBP10   | + | 89813914  | 89858705  |
| chr7  | NM_000181    | GUSB      | - | 65063107  | 65084736  |
| chr7  | NM_012257    | HBP1      | + | 106596695 | 106630210 |
| chr12 | NM_024078    | NOC4L     | + | 131194945 | 131202939 |
| chr12 | NM_001033714 | NOP2      | - | 6536297   | 6547741   |
| chr7  | NM_017802    | HEATR2    | + | 732863    | 792642    |
| chr7  | NM_022373    | HERPUD2   | - | 35638794  | 35701297  |
| chr7  | NM_002137    | HNRNPA2B1 | - | 26196080  | 26206938  |
| chr12 | NM_020401    | NUP107    | + | 67366997  | 67422740  |
| chr7  | NM_002141    | HOXA4     | - | 27134650  | 27136924  |
| chr12 | NM_024068    | OBFC2B    | + | 54904391  | 54909905  |
| chr12 | NM_024623    | OGFOD2    | + | 122025306 | 122030541 |
| chr7  | NM_001080453 | INTS1     | - | 1476438   | 1510544   |
| chr12 | NM_001017956 | OS9       | + | 56374004  | 56401607  |
| chr12 | NM_006191    | PA2G4     | + | 54784369  | 54793961  |
| chr12 | NM_001166279 | PAN2      | - | 54996273  | 55014104  |



|       |              |              |   |           |           |
|-------|--------------|--------------|---|-----------|-----------|
| chr7  | NM_015483    | KBTBD2       | - | 32874302  | 32897993  |
| chr12 | NM_002567    | PEBP1        | + | 117058252 | 117067773 |
| chr7  | NM_014855    | KIAA0415     | + | 4781787   | 4800552   |
| chr12 | NM_001166686 | PFKM         | + | 46785922  | 46826454  |
| chr12 | NM_001170543 | PGAM5        | + | 131797465 | 131809396 |
| chr12 | NM_001144831 | PHB2         | - | 6944775   | 6950177   |
| chr7  | NR_021487    | KIAA1908     | + | 1576234   | 1595787   |
| chr12 | NM_001199781 | POC1B-GALNT4 | - | 88437320  | 88444170  |
| chr7  | NR_024454    | LOC100134713 | - | 140041604 | 140043346 |
| chr12 | NM_012406    | PRDM4        | - | 106650772 | 106679044 |
| chr12 | NM_006253    | PRKAB1       | + | 118590143 | 118603812 |
| chr12 | NM_002733    | PRKAG1       | - | 47682321  | 47698859  |
| chr7  | NR_036573    | LOC155060    | + | 148613304 | 148625336 |
| chr7  | NR_027118    | LOC285954    | + | 41700038  | 41785501  |
| chr12 | NM_002813    | PSMD9        | + | 120811028 | 120840154 |
| chr12 | NM_006601    | PTGES3       | - | 55343391  | 55368345  |
| chr7  | NR_027040    | LOC401431    | - | 149195715 | 149201884 |
| chr12 | NM_007062    | PWP1         | + | 106603719 | 106630387 |
| chr12 | NM_001167606 | RAB35        | - | 119017281 | 119039026 |
| chr7  | NR_034169    | LOC728066    | - | 92028303  | 92057632  |
| chr12 | NM_001130862 | RAD51AP1     | + | 4518210   | 4539474   |
| chr12 | NM_134424    | RAD52        | - | 891515    | 929124    |
| chr12 | NM_152442    | RAD9B        | + | 109424387 | 109454274 |
| chr7  | NR_003934    | LOC729156    | - | 65912414  | 65947248  |
| chr7  | NR_034084    | LOC729852    | + | 7646866   | 7885376   |
| chr7  | NM_002319    | LRCH4        | - | 100009569 | 100021712 |
| chr7  | NM_152892    | LRWD1        | + | 101892394 | 101900617 |
| chr7  | NM_016019    | LUC7L2       | + | 138695173 | 138758740 |
| chr12 | NM_002907    | RECQL        | - | 21513110  | 21545870  |
| chr7  | NM_001128619 | LUZP6        | - | 135262042 | 135312744 |
| chr7  | NM_005918    | MDH2         | + | 75515328  | 75533866  |
| chr7  | NM_001194990 | MEPCE        | + | 99864348  | 99869685  |
| chr12 | NM_025126    | RNF34        | + | 120322284 | 120346538 |
| chr12 | NM_194359    | RNF41        | - | 54884552  | 54902002  |
| chr7  | NR_002822    | MGC72080     | - | 97433843  | 97439574  |
| chr12 | NR_026825    | RPSAP52      | - | 64438067  | 64507021  |
| chr12 | NM_023012    | RSRC2        | - | 121555142 | 121577513 |
| chr12 | NR_026722    | SARNP        | - | 54432513  | 54497807  |
| chr7  | NR_029517    | MIR29B1      | - | 130212757 | 130212838 |
| chr12 | NM_004719    | SCAF11       | - | 44599180  | 44670668  |
| chr12 | NM_017988    | SCYL2        | + | 99185679  | 99258045  |
| chr12 | NM_014554    | SENP1        | - | 46723023  | 46785908  |
| chr12 | NM_004592    | SFSWAP       | + | 130761587 | 130850235 |
| chr12 | NM_002635    | SLC25A3      | + | 97511533  | 97519909  |
| chr7  | NM_013446    | MKRN1        | - | 139799308 | 139825838 |
| chr12 | NM_018656    | SLC35E3      | + | 67426202  | 67446120  |
| chr7  | NM_018682    | MLL5         | + | 104441872 | 104541768 |

|       |              |          |   |           |           |
|-------|--------------|----------|---|-----------|-----------|
| chr7  | NM_031903    | MRPL32   | + | 42938463  | 42943978  |
| chr7  | NM_053035    | MRPS33   | - | 140352429 | 140361250 |
| chr7  | NM_006980    | MTERF    | - | 91339956  | 91347952  |
| chr7  | NM_145808    | MTPN     | - | 135262042 | 135312744 |
| chr7  | NM_001190487 | MTRNR2L6 | + | 142053693 | 142055088 |
| chr7  | NM_016200    | NAA38    | + | 117611321 | 117631329 |
| chr12 | NR_002737    | SNORD59A | - | 55325077  | 55325152  |
| chr7  | NM_001122838 | NAPEPLD  | - | 102527258 | 102576805 |
| chr7  | NM_002489    | NDUFA4   | - | 10938104  | 10946338  |
| chr7  | NM_005011    | NRF1     | + | 129038790 | 129184158 |
| chr12 | NM_001178078 | STAT6    | - | 55775454  | 55791463  |
| chr12 | NM_007178    | STRAP    | + | 15926554  | 15947677  |
| chr7  | NM_001002010 | NT5C3    | - | 33020266  | 33068934  |
| chr12 | NM_022491    | SUDS3    | + | 117298740 | 117340223 |
| chr7  | NM_015332    | NUDCD3   | - | 44388489  | 44496910  |
| chr7  | NM_007342    | NUPL2    | + | 23187970  | 23207155  |
| chr12 | NM_018009    | TAPBPL   | + | 6431437   | 6441749   |
| chr12 | NM_004178    | TARBP2   | + | 52180971  | 52186482  |
| chr12 | NM_001146213 | TBC1D15  | + | 70519753  | 70606896  |
| chr12 | NM_013254    | TBK1     | + | 63132106  | 63182166  |
| chr12 | NM_005996    | TBX3     | - | 113592441 | 113606352 |
| chr12 | NM_001143852 | TCHP     | + | 108822461 | 108840257 |
| chr12 | NM_003211    | TDG      | + | 102883722 | 102906786 |
| chr12 | NM_031435    | THAP2    | + | 70343943  | 70360695  |
| chr12 | NM_016056    | TMBIM4   | - | 64816983  | 64850074  |
| chr12 | NM_003217    | TMBIM6   | + | 48421559  | 48444984  |
| chr7  | NM_000466    | PEX1     | - | 91954272  | 91995781  |
| chr12 | NM_006815    | TMED2    | + | 122635028 | 122648641 |
| chr12 | NM_001143841 | TMEM106C | + | 46643596  | 46648928  |
| chr7  | NR_033436    | PHF14    | + | 10980023  | 11175775  |
| chr12 | NM_001193453 | TMEM116  | - | 110853469 | 110935406 |
| chr7  | NM_001130929 | PL-5283  | + | 134997760 | 135011700 |
| chr7  | NM_001197027 | PLEKHA8  | + | 30034501  | 30124486  |
| chr7  | NM_001084    | PLOD3    | - | 100635977 | 100647731 |
| chr7  | NM_004279    | PMPCB    | + | 102725108 | 102742369 |
| chr7  | NM_000535    | PMS2     | - | 5979395   | 6015263   |
| chr12 | NM_181783    | TMTC3    | + | 87060203  | 87117795  |
| chr7  | NR_028059    | PMS2P3   | - | 74975004  | 74995389  |
| chr12 | NM_016399    | TRIAP1   | - | 119366146 | 119368598 |
| chr12 | NM_001172697 | TSFM     | + | 56462794  | 56482906  |
| chr7  | NR_003655    | POLR2J4  | - | 43947018  | 44025273  |
| chr7  | NM_172020    | POM121   | + | 71987871  | 72056774  |
| chr7  | NM_001099415 | POM121C  | - | 74884000  | 74953504  |
| chr12 | NM_001160408 | TULP3    | + | 2870293   | 2920567   |
| chr7  | NM_005837    | POP7     | + | 100141611 | 100143059 |
| chr7  | NM_000941    | POR      | + | 75382355  | 75454109  |
| chr12 | NM_130466    | UBE3B    | + | 108399821 | 108458890 |

|       |              |          |   |           |           |
|-------|--------------|----------|---|-----------|-----------|
| chr12 | NM_006313    | USP15    | + | 60940453  | 61086165  |
| chr12 | NM_032663    | USP30    | + | 107974762 | 108010214 |
| chr12 | NM_001098536 | USP5     | + | 6831545   | 6846056   |
| chr12 | NM_014231    | VAMP1    | - | 6441664   | 6450104   |
| chr12 | NM_017599    | VEZT     | + | 94135652  | 94220697  |
| chr12 | NM_016226    | VPS29    | - | 109413712 | 109424299 |
| chr12 | NM_022916    | VPS33A   | - | 121282046 | 121317021 |
| chr7  | NM_002787    | PSMA2    | - | 42922986  | 42938330  |
| chr7  | NM_002803    | PSMC2    | + | 102775324 | 102795892 |
| chr7  | NM_001134340 | PSMG3    | - | 1573494   | 1576194   |
| chr12 | NM_016312    | WBP11    | - | 14830678  | 14847668  |
| chr7  | NM_004577    | PSPH     | - | 56046237  | 56086762  |
| chr7  | NM_033224    | PURB     | - | 44882416  | 44891485  |
| chr12 | NM_001040436 | YARS2    | - | 32790744  | 32800154  |
| chr12 | NM_006530    | YEATS4   | + | 68039798  | 68070843  |
| chr7  | NM_005402    | RALA     | + | 39629686  | 39714242  |
| chr12 | NM_032786    | ZC3H10   | + | 54798296  | 54802545  |
| chr12 | NM_017612    | ZCCHC8   | - | 121523387 | 121551471 |
| chr12 | NM_144982    | ZFC3H1   | - | 70289648  | 70344016  |
| chr12 | NM_015394    | ZNF10    | + | 132217286 | 132246122 |
| chr7  | NM_021163    | RBAK     | + | 5052078   | 5075645   |
| chr12 | NM_003440    | ZNF140   | + | 132167109 | 132194331 |
| chr7  | NM_001166135 | RBM28    | - | 127737671 | 127771198 |
| chr12 | NM_019591    | ZNF26    | + | 132073128 | 132099226 |
| chr12 | NM_001135734 | ZNF384   | - | 6645903   | 6668937   |
| chr7  | NM_001099695 | REPIN1   | + | 149696811 | 149702066 |
| chr7  | NM_002914    | RFC2     | - | 73283767  | 73306674  |
| chr12 | NM_001004304 | ZNF740   | + | 51860801  | 51870921  |
| chr7  | NR_015449    | RNF216L  | + | 4980141   | 5004326   |
| chr7  | NM_030936    | RNF32    | + | 156126113 | 156162581 |
| chr21 | NM_001003696 | ATP5J    | - | 26018661  | 26029836  |
| chr21 | NM_001697    | ATP5O    | - | 34197626  | 34210028  |
| chr7  | NM_016038    | SBDS     | - | 66090124  | 66098023  |
| chr7  | NR_024110    | SBDSP1   | + | 71937887  | 71945914  |
| chr7  | NM_001012456 | SEC61G   | - | 54787433  | 54794433  |
| chr21 | NM_004928    | C21orf2  | - | 44573254  | 44583713  |
| chr21 | NM_004649    | C21orf33 | + | 44377921  | 44390033  |
| chr21 | NM_018944    | C21orf45 | - | 32562400  | 32573247  |
| chr7  | NM_003930    | SKAP2    | - | 26673212  | 26870866  |
| chr21 | NR_024622    | C21orf49 | + | 33066281  | 33091886  |
| chr21 | NM_021254    | C21orf59 | - | 32895854  | 32906789  |
| chr7  | NM_018843    | SLC25A40 | - | 87301749  | 87343628  |
| chr21 | NR_027128    | C21orf67 | - | 45177626  | 45184256  |
| chr21 | NM_058190    | C21orf70 | + | 45184382  | 45221316  |
| chr7  | NM_032826    | SLC35B4  | - | 133624629 | 133652367 |
| chr7  | NM_001199692 | SLC4A2   | + | 150386231 | 150404547 |
| chr21 | NM_006585    | CCT8     | - | 29350518  | 29367881  |

|       |              |           |   |           |           |
|-------|--------------|-----------|---|-----------|-----------|
| chr21 | NM_001146116 | DIP2A     | + | 46703289  | 46814354  |
| chr21 | NM_001040192 | DNAJC28   | - | 33782107  | 33785893  |
| chr7  | NM_001128852 | SRRT      | + | 100310636 | 100324221 |
| chr7  | NM_003143    | SSBP1     | + | 141084644 | 141096726 |
| chr21 | NM_006052    | DSCR3     | - | 37517595  | 37561703  |
| chr21 | NM_058182    | FAM165B   | + | 34669618  | 34683322  |
| chr21 | NM_001197297 | GABPA     | + | 26029128  | 26066642  |
| chr21 | NM_001136006 | GART      | - | 33798107  | 33837068  |
| chr21 | NM_016631    | GCFC1     | - | 33028080  | 33066040  |
| chr21 | NM_006948    | HSPA13    | - | 14665307  | 14677380  |
| chr7  | NM_016086    | STYXL1    | - | 75463590  | 75515257  |
| chr7  | NM_001042469 | SUMF2     | + | 56099410  | 56115859  |
| chr21 | NM_000629    | IFNAR1    | + | 33619083  | 33653998  |
| chr7  | NM_001190415 | TAF6      | - | 99542628  | 99555417  |
| chr7  | NM_004749    | TBRG4     | - | 45106223  | 45117842  |
| chr7  | NM_001130475 | THAP5     | - | 107989906 | 107997403 |
| chr7  | NM_182547    | TMED4     | - | 44585286  | 44588352  |
| chr7  | NM_001134232 | TMEM106B  | + | 12217372  | 12243415  |
| chr7  | NM_022484    | TMEM168   | - | 112193022 | 112217714 |
| chr7  | NM_032842    | TMEM209   | - | 129591790 | 129632574 |
| chr7  | NM_001191028 | TNPO3     | - | 128381469 | 128482463 |
| chr7  | NM_019059    | TOMM7     | - | 22818776  | 22828946  |
| chr7  | NR_002187    | TPI1P2    | + | 128482512 | 128484529 |
| chr7  | NM_013293    | TRA2A     | - | 23510925  | 23538181  |
| chr7  | NM_033017    | TRIM4     | - | 99325965  | 99355159  |
| chr7  | NM_003302    | TRIP6     | + | 100302885 | 100309012 |
| chr21 | NR_026943    | LOC642852 | + | 45532394  | 45541697  |
| chr21 | NM_015565    | LTN1      | - | 29222336  | 29287148  |
| chr7  | NM_001144920 | TTC26     | + | 138469029 | 138525090 |
| chr7  | NM_001002926 | TWISTNB   | - | 19701609  | 19715185  |
| chr21 | NM_015358    | MORC3     | + | 36614356  | 36670814  |
| chr21 | NM_017446    | MRPL39    | - | 25879838  | 25901672  |
| chr7  | NM_015983    | UBE2D4    | + | 43932559  | 43962260  |
| chr7  | NM_173569    | UBN2      | + | 138566770 | 138643522 |
| chr21 | NM_013240    | N6AMT1    | - | 29166383  | 29179564  |
| chr7  | NM_032172    | USP42     | + | 6111075   | 6167720   |
| chr7  | NM_003941    | WASL      | - | 123109232 | 123176352 |
| chr21 | NM_001001503 | NDUFV3    | + | 43186446  | 43202842  |
| chr7  | NM_017528    | WBSCR22   | + | 72735833  | 72750478  |
| chr7  | NM_018051    | WDR60     | + | 158342029 | 158431644 |
| chr21 | NM_153682    | PIGP      | - | 37359533  | 37367328  |
| chr7  | NM_001033518 | WIPI2     | + | 5196360   | 5240012   |
| chr21 | NM_015227    | POFUT2    | - | 45508270  | 45532239  |
| chr7  | NM_005431    | XRCC2     | - | 151974519 | 152004183 |
| chr21 | NM_001040424 | PRDM15    | - | 42091453  | 42172651  |
| chr21 | NM_001535    | PRMT2     | + | 46879954  | 46909291  |
| chr21 | NM_003720    | PSMG1     | - | 39469253  | 39477310  |

|       |              |          |   |           |           |
|-------|--------------|----------|---|-----------|-----------|
| chr21 | NM_004339    | PTTG1IP  | - | 45093927  | 45118246  |
| chr7  | NM_016478    | ZC3HC1   | - | 129445361 | 129478469 |
| chr7  | NM_017984    | ZCWPW1   | - | 99836430  | 99864238  |
| chr21 | NM_003683    | RRP1     | + | 44033845  | 44048411  |
| chr7  | NM_182491    | ZFAND2A  | - | 1159068   | 1166381   |
| chr21 | NM_080860    | RSPH1    | - | 42765665  | 42789470  |
| chr21 | NM_016940    | RWDD2B   | - | 29299950  | 29313556  |
| chr7  | NM_006956    | ZNF12    | - | 6694588   | 6713091   |
| chr21 | NM_017438    | SETD4    | - | 36328708  | 36354686  |
| chr7  | NM_021994    | ZNF277   | + | 111633878 | 111771225 |
| chr7  | NM_017715    | ZNF3     | - | 99499588  | 99517307  |
| chr7  | NM_032164    | ZNF394   | - | 98928789  | 98935813  |
| chr7  | NM_020781    | ZNF398   | + | 148454440 | 148511051 |
| chr7  | NM_001001661 | ZNF425   | - | 148430810 | 148454371 |
| chr21 | NM_138927    | SON      | + | 33837219  | 33871682  |
| chr7  | NM_145115    | ZNF498   | + | 99052506  | 99067966  |
| chr7  | NM_001083956 | ZNF655   | + | 98993980  | 99012013  |
| chr7  | NM_001195220 | ZNF783   | + | 148590194 | 148613018 |
| chr7  | NM_152411    | ZNF786   | - | 148397665 | 148418802 |
| chr7  | NM_176814    | ZNF800   | - | 126797589 | 126820003 |
| chr7  | NM_001099220 | ZNF862   | + | 149166441 | 149195501 |
| chr21 | NM_003274    | TRAPPC10 | + | 44256633  | 44350860  |
| chr7  | NM_006349    | ZNHIT1   | + | 100647704 | 100654191 |
| chr21 | NM_001001894 | TTC3     | + | 37367440  | 37497278  |
| chr21 | NM_001025203 | U2AF1    | - | 43386134  | 43400757  |
| chr21 | NM_001202489 | UBE2G2   | - | 45012922  | 45046179  |
| chr6  | NM_001025091 | ABCF1    | + | 30647148  | 30667288  |
| chr21 | NM_001001992 | USP16    | + | 29318808  | 29348678  |
| chr6  | NM_021160    | ABHD16A  | - | 31762704  | 31779116  |
| chr6  | NM_013375    | ABT1     | + | 26705158  | 26708256  |
| chr21 | NM_033661    | WDR4     | - | 43136272  | 43172747  |
| chr6  | NM_005891    | ACAT2    | + | 160102978 | 160120077 |
| chr6  | NM_001160094 | ACOT13   | + | 24775241  | 24813274  |
| chr21 | NM_058181    | YBEY     | + | 46530694  | 46542093  |
| chr6  | NM_182503    | ADAT2    | - | 143785661 | 143813534 |
| chr6  | NM_032741    | AGPAT1   | - | 32243960  | 32253866  |
| chr3  | NM_018358    | ABCF3    | + | 185386556 | 185394489 |
| chr3  | NM_018394    | ABHD10   | + | 113180517 | 113194900 |
| chr3  | NM_016006    | ABHD5    | + | 43707378  | 43739221  |
| chr6  | NM_018064    | AKIRIN2  | - | 88441296  | 88468704  |
| chr6  | NM_001634    | AMD1     | + | 111302679 | 111323606 |
| chr3  | NM_032169    | ACAD11   | - | 133759671 | 133861665 |
| chr3  | NM_014049    | ACAD9    | + | 130081022 | 130114647 |
| chr6  | NM_032131    | ARMC2    | + | 109276311 | 109402045 |
| chr6  | NR_033823    | ATAT1    | + | 30702591  | 30722577  |
| chr6  | NM_004849    | ATG5     | - | 106739044 | 106880388 |
| chr6  | NM_130463    | ATP6V1G2 | - | 31620218  | 31622606  |

|      |              |          |   |           |           |
|------|--------------|----------|---|-----------|-----------|
| chr3 | NM_199166    | ALAS1    | + | 52207155  | 52223383  |
| chr6 | NM_003782    | B3GALT4  | + | 33352894  | 33354580  |
| chr6 | NM_001199697 | BAG6     | - | 31714783  | 31728456  |
| chr3 | NM_001006941 | ALG3     | - | 185442810 | 185450007 |
| chr6 | NM_001077440 | BCLAF1   | - | 136619693 | 136652682 |
| chr3 | NR_024400    | ANAPC13  | - | 135679235 | 135687555 |
| chr3 | NM_001025205 | AP2M1    | + | 185375327 | 185384573 |
| chr3 | NM_001640    | APEH     | + | 49686438  | 49695938  |
| chr3 | NM_001660    | ARF4     | - | 57532129  | 57558255  |
| chr3 | NM_006321    | ARIH2    | + | 48931284  | 48997975  |
| chr3 | NM_032146    | ARL6     | + | 98966284  | 99000063  |
| chr3 | NM_018184    | ARL8B    | + | 5138929   | 5197601   |
| chr3 | NM_014065    | ASTE1    | - | 132215410 | 132228336 |
| chr3 | NM_022488    | ATG3     | - | 113734048 | 113763175 |
| chr6 | NM_006443    | C6orf108 | - | 43301344  | 43305189  |
| chr3 | NM_001690    | ATP6V1A  | + | 114948555 | 115013595 |
| chr6 | NM_001029863 | C6orf120 | + | 169844181 | 169848327 |
| chr3 | NM_001184    | ATR      | - | 143650766 | 143780358 |
| chr3 | NM_032166    | ATRIP    | + | 48463221  | 48482058  |
| chr6 | NM_145063    | C6orf130 | - | 41142508  | 41148166  |
| chr6 | NM_001109938 | C6orf136 | + | 30722794  | 30728966  |
| chr3 | NM_001003694 | BRPF1    | + | 9748433   | 9764699   |
| chr3 | NM_000060    | BTD      | + | 15618258  | 15662329  |
| chr3 | NM_016589    | C3orf1   | + | 120700057 | 120725815 |
| chr3 | NM_018462    | C3orf10  | + | 10132332  | 10143874  |
| chr3 | NM_015412    | C3orf17  | - | 114203981 | 114221245 |
| chr6 | NM_152730    | C6orf170 | - | 121442325 | 121697343 |
| chr3 | NM_016474    | C3orf19  | + | 14668256  | 14689170  |
| chr3 | NM_173826    | C3orf23  | + | 44354947  | 44425944  |
| chr6 | NM_001142468 | C6orf203 | + | 107456099 | 107479239 |
| chr6 | NM_024573    | C6orf211 | + | 151815114 | 151832925 |
| chr3 | NM_032898    | C3orf34  | - | 197917544 | 197923520 |
| chr3 | NM_173824    | C3orf38  | + | 88281582  | 88289805  |
| chr6 | NM_025258    | C6orf27  | - | 31841349  | 31853087  |
| chr6 | NR_026736    | C6orf52  | - | 10779636  | 10803016  |
| chr3 | NR_026991    | C3orf47  | + | 130517803 | 130526102 |
| chr6 | NM_018322    | C6orf64  | - | 39179817  | 39190843  |
| chr6 | NM_018341    | C6orf70  | + | 169893645 | 169923542 |
| chr6 | NM_152734    | C6orf89  | + | 36961617  | 37004718  |
| chr6 | NM_001170692 | CAGE1    | - | 7271885   | 7334941   |
| chr3 | NM_173654    | C3orf64  | - | 69107057  | 69145464  |
| chr6 | NM_015439    | CCDC28A  | + | 139136349 | 139156149 |
| chr3 | NR_027331    | C3orf74  | - | 52071149  | 52074168  |
| chr6 | NM_001013399 | CCNC     | - | 100096983 | 100123411 |
| chr3 | NM_001031703 | C3orf75  | - | 47512133  | 47530203  |
| chr3 | NM_001124767 | C3orf78  | + | 52545660  | 52549626  |
| chr6 | NM_001142401 | CD164    | - | 109794409 | 109810455 |

|      |              |          |   |           |           |
|------|--------------|----------|---|-----------|-----------|
| chr6 | NM_015891    | CDC40    | + | 110608316 | 110660115 |
| chr6 | NM_001253    | CDC5L    | + | 44463279  | 44522758  |
| chr6 | NM_015076    | CDK19    | - | 111037873 | 111243105 |
| chr3 | NM_014296    | CAPN7    | + | 15222736  | 15269427  |
| chr6 | NM_018132    | CENPQ    | + | 49539054  | 49568779  |
| chr6 | NM_001083535 | CEP57L1  | + | 109523048 | 109591808 |
| chr3 | NM_181426    | CCDC39   | - | 181814489 | 181879977 |
| chr3 | NM_024661    | CCDC51   | - | 48448583  | 48456533  |
| chr3 | NM_001017928 | CCDC58   | - | 123561125 | 123584764 |
| chr3 | NM_022903    | CCDC71   | - | 49174971  | 49178789  |
| chr3 | NM_015933    | CCDC72   | + | 48456689  | 48460541  |
| chr3 | NM_199511    | CCDC80   | - | 113806098 | 113842667 |
| chr6 | NM_017421    | COQ3     | - | 99924068  | 99948803  |
| chr6 | NM_001865    | COX7A2   | - | 76004110  | 76010364  |
| chr6 | NM_001320    | CSNK2B   | + | 31741635  | 31745822  |
| chr6 | NM_001168370 | CUL7     | - | 43113332  | 43129661  |
| chr6 | NM_015089    | CUL9     | + | 43257899  | 43300303  |
| chr6 | NM_001014433 | CUTA     | - | 33492296  | 33494043  |
| chr3 | NM_001777    | CD47     | - | 109244630 | 109292625 |
| chr6 | NM_016230    | CYB5R4   | + | 84626088  | 84726865  |
| chr3 | NM_001789    | CDC25A   | - | 48173671  | 48204805  |
| chr6 | NM_001141969 | DAXX     | - | 33394312  | 33398771  |
| chr3 | NM_001134422 | CDV3     | + | 134775123 | 134791808 |
| chr3 | NM_001407    | CELSR3   | - | 48648899  | 48675352  |
| chr3 | NM_001042384 | CEP63    | + | 135687264 | 135776545 |
| chr3 | NM_001195308 | CGGBP1   | - | 88183789  | 88281706  |
| chr6 | NM_022047    | DEF6     | + | 35373572  | 35397526  |
| chr3 | NM_001098502 | CHCHD4   | - | 14128577  | 14141372  |
| chr3 | NM_014043    | CHMP2B   | + | 87359102  | 87387388  |
| chr6 | NM_001164239 | DHX16    | - | 30728874  | 30748809  |
| chr3 | NR_002786    | CIDECP   | - | 10034236  | 10042820  |
| chr6 | NM_020185    | DUSP22   | + | 237100    | 296355    |
| chr3 | NM_182523    | CMC1     | + | 28258127  | 28336267  |
| chr6 | NM_001002030 | ECHDC1   | - | 127651549 | 127706447 |
| chr3 | NM_001127192 | CNBP     | - | 130369347 | 130385500 |
| chr3 | NM_015442    | CNOT10   | + | 32701701  | 32790358  |
| chr6 | NM_018100    | EFHC1    | + | 52392952  | 52468542  |
| chr3 | NR_027927    | COL6A4P1 | - | 15181872  | 15222470  |
| chr3 | NM_016094    | COMMD2   | - | 150938946 | 150952976 |
| chr3 | NM_004766    | COPB2    | - | 140559122 | 140591212 |
| chr3 | NM_016128    | COPG     | + | 130451142 | 130479306 |
| chr3 | NM_005694    | COX17    | - | 120871061 | 120878933 |
| chr3 | NM_015513    | CRELD1   | + | 9950523   | 9962097   |
| chr6 | NM_032448    | FAM120B  | + | 170457768 | 170556162 |
| chr3 | NM_007022    | CYB561D2 | + | 50363300  | 50366500  |
| chr6 | NM_012135    | FAM50B   | + | 3794630   | 3796550   |
| chr6 | NM_001099286 | FAM54A   | - | 136593860 | 136613142 |

|      |              |           |   |           |           |
|------|--------------|-----------|---|-----------|-----------|
| chr3 | NM_018403    | DCP1A     | - | 53292484  | 53356694  |
| chr6 | NM_032145    | FBXO30    | - | 146160964 | 146177614 |
| chr6 | NM_001142522 | FBXO5     | - | 153333350 | 153346433 |
| chr3 | NM_001195643 | DHFR1L1   | - | 95259455  | 95264757  |
| chr3 | NM_014966    | DHX30     | + | 47819402  | 47866690  |
| chr3 | NM_001114397 | DHX36     | - | 155476150 | 155524980 |
| chr3 | NM_032839    | DIRC2     | + | 123996590 | 124082676 |
| chr6 | NM_014845    | FIG4      | + | 110119116 | 110253327 |
| chr3 | NM_016306    | DNAJB11   | + | 187771160 | 187786283 |
| chr3 | NM_145261    | DNAJC19   | - | 182184191 | 182190256 |
| chr6 | NM_005803    | FLOT1     | - | 30803489  | 30818432  |
| chr3 | NM_001047434 | DPH3      | - | 16273571  | 16281500  |
| chr6 | NM_033260    | FOXQ1     | + | 1257674   | 1259993   |
| chr3 | NM_016141    | DYNC1LI1  | - | 32542466  | 32587370  |
| chr6 | NM_015050    | FTSJD2    | + | 37508884  | 37557262  |
| chr3 | NM_014648    | DZIP3     | + | 109791026 | 109896383 |
| chr3 | NM_033083    | EAF1      | + | 15444067  | 15459124  |
| chr3 | NM_014693    | ECE2      | + | 185450138 | 185493513 |
| chr3 | NM_032025    | EIF2A     | + | 151747263 | 151786493 |
| chr3 | NM_003907    | EIF2B5    | + | 185335503 | 185345793 |
| chr6 | NM_005275    | GNL1      | - | 30617133  | 30633350  |
| chr6 | NM_001017408 | GOPC      | - | 117988125 | 118030398 |
| chr3 | NM_014805    | EPM2AIP1  | - | 37002360  | 37009799  |
| chr3 | NM_001033030 | FAIM      | + | 139810231 | 139834903 |
| chr3 | NM_001171093 | FAM131A   | + | 185536410 | 185546757 |
| chr6 | NM_022107    | GPSM3     | - | 32266520  | 32271278  |
| chr3 | NM_014367    | FAM162A   | + | 123585712 | 123611651 |
| chr6 | NM_001512    | GSTA4     | - | 52950704  | 52968137  |
| chr3 | NM_001018115 | FANCD2    | + | 10043112  | 10118614  |
| chr6 | NM_001517    | GTF2H4    | + | 30983955  | 30989859  |
| chr6 | NM_138408    | GTF3C6    | + | 111386455 | 111395784 |
| chr3 | NM_001105573 | FBXO45    | + | 197780121 | 197800327 |
| chr6 | NM_001145158 | HBS1L     | - | 135323213 | 135417729 |
| chr6 | NR_026790    | HCG11     | + | 26629912  | 26635591  |
| chr3 | NR_033373    | FLJ39534  | + | 47180863  | 47260610  |
| chr6 | NM_001527    | HDAC2     | - | 114364012 | 114399052 |
| chr6 | NM_138571    | HINT3     | + | 126319553 | 126343082 |
| chr3 | NM_145262    | GLYCTK    | + | 52296875  | 52304312  |
| chr3 | NM_001172713 | GOLGA4    | + | 37259685  | 37383374  |
| chr3 | NM_004487    | GOLGB1    | - | 122864737 | 122951292 |
| chr6 | NM_138720    | HIST1H2BD | + | 26266327  | 26279555  |
| chr6 | NM_080593    | HIST1H2BK | - | 27214050  | 27222616  |
| chr3 | NM_005513    | GTF2E1    | + | 121944247 | 121984606 |
| chr3 | NM_014170    | GTPBP8    | + | 114192489 | 114202911 |
| chr3 | NM_012260    | HACL1     | - | 15577243  | 15618134  |
| chr3 | NM_016173    | HEMK1     | + | 50581912  | 50597425  |
| chr3 | NM_024610    | HSPBAP1   | - | 123941535 | 123995340 |



|      |              |              |   |           |           |
|------|--------------|--------------|---|-----------|-----------|
| chr3 | NM_001200030 | HYAL3        | - | 50305262  | 50311903  |
| chr3 | NM_006764    | IFRD2        | - | 50300166  | 50305030  |
| chr3 | NM_052985    | IFT122       | + | 130641657 | 130721881 |
| chr3 | NM_001190241 | IFT80        | - | 161457467 | 161600014 |
| chr3 | NM_032732    | IL17RC       | + | 9933763   | 9950314   |
| chr6 | NM_006353    | HMGNA4       | + | 26646550  | 26655143  |
| chr3 | NM_001006115 | IP6K1        | - | 49736731  | 49798977  |
| chr6 | NM_005346    | HSPA1B       | + | 31903490  | 31906010  |
| chr6 | NM_015525    | IBTK         | - | 82936674  | 83014167  |
| chr3 | NM_032263    | IQCG         | - | 199100342 | 199171283 |
| chr3 | NM_001199469 | ISY1         | - | 130328948 | 130362763 |
| chr6 | NM_001010844 | IRAK1BP1     | + | 79633907  | 79665039  |
| chr3 | NM_020696    | KIAA1143     | - | 44765239  | 44778177  |
| chr3 | NM_020817    | KIAA1407     | - | 115165673 | 115258150 |
| chr3 | NM_020890    | KIAA1524     | - | 109751407 | 109791181 |
| chr3 | NM_020242    | KIF15        | + | 44778212  | 44869752  |
| chr3 | NM_001134878 | KIF9         | - | 47244519  | 47299341  |
| chr6 | NM_015323    | KIAA0776     | + | 97076422  | 97109872  |
| chr6 | NM_014895    | KIAA1009     | - | 84890678  | 84994054  |
| chr3 | NM_025010    | KLHL18       | + | 47299333  | 47363310  |
| chr6 | NM_153369    | KIAA1919     | + | 111687174 | 111696954 |
| chr3 | NM_002268    | KPNA4        | - | 161700655 | 161766070 |
| chr6 | NM_002263    | KIFC1        | + | 33467290  | 33485677  |
| chr6 | NM_201521    | KLC4         | + | 43135349  | 43150811  |
| chr6 | NM_057161    | KLHDC3       | + | 43089954  | 43097009  |
| chr6 | NM_145315    | LACE1        | + | 108722790 | 108950944 |
| chr3 | NM_001136049 | LMLN         | + | 199171467 | 199254988 |
| chr3 | NM_001085451 | LNP1         | + | 101602726 | 101657860 |
| chr6 | NM_001122769 | LCA5         | - | 80251426  | 80303866  |
| chr6 | NM_181336    | LEMD2        | - | 33846967  | 33864884  |
| chr3 | NR_028303    | LOC100302640 | - | 108311326 | 108442175 |
| chr6 | NR_037169    | LOC100507547 | - | 32228556  | 32230120  |
| chr6 | NR_037593    | LOC100526820 | - | 163754086 | 163754972 |
| chr6 | NM_001135575 | LOC221710    | + | 11202251  | 11246955  |
| chr3 | NR_003266    | LOC220729    | - | 198825294 | 198839149 |
| chr3 | NR_033947    | LOC644714    | - | 45694660  | 45705378  |
| chr6 | NM_018214    | LRRC1        | + | 53767736  | 53896878  |
| chr6 | NM_032860    | LTV1         | + | 144206200 | 144226636 |
| chr3 | NM_001099678 | LRRC58       | - | 121526265 | 121550876 |
| chr6 | NM_020466    | LYRM2        | - | 90398663  | 90405195  |
| chr3 | NM_001134369 | LRRFIP2      | - | 37069120  | 37192855  |
| chr3 | NM_018385    | LSG1         | - | 195842805 | 195874495 |
| chr3 | NM_014463    | LSM3         | + | 14195231  | 14214873  |
| chr6 | NM_003188    | MAP3K7       | - | 91282073  | 91353628  |
| chr3 | NM_020347    | LZTFL1       | - | 45840449  | 45858625  |
| chr3 | NM_006010    | MANF         | + | 51397731  | 51401868  |
| chr3 | NM_003925    | MBD4         | - | 130632482 | 130641542 |

|      |              |            |   |           |           |
|------|--------------|------------|---|-----------|-----------|
| chr6 | NM_014623    | MEA1       | - | 43087944  | 43089596  |
| chr6 | NM_004275    | MED20      | - | 41981069  | 41996855  |
| chr3 | NM_152396    | METTL6     | - | 15426380  | 15444046  |
| chr6 | NM_015979    | MED23      | - | 131936798 | 131991056 |
| chr3 | NR_031650    | MIR1248    | + | 187987154 | 187987260 |
| chr6 | NR_036096    | MIR3143    | + | 27223383  | 27223446  |
| chr6 | NM_014161    | MRPL18     | + | 160131481 | 160139451 |
| chr6 | NM_001193343 | MRPS18A    | - | 43746911  | 43763527  |
| chr6 | NM_014046    | MRPS18B    | + | 30693464  | 30702153  |
| chr6 | NM_020662    | MRS2       | + | 24511131  | 24533795  |
| chr6 | NM_014341    | MTCH1      | - | 37043894  | 37061927  |
| chr3 | NM_014160    | MKRN2      | + | 12573593  | 12600210  |
| chr3 | NM_000249    | MLH1       | + | 37009844  | 37067341  |
| chr6 | NM_001114184 | MTRF1L     | - | 153350092 | 153365618 |
| chr6 | NM_000255    | MUT        | - | 49506031  | 49539000  |
| chr3 | NM_007208    | MRPL3      | - | 132663734 | 132704550 |
| chr3 | NM_020409    | MRPL47     | - | 180788948 | 180805128 |
| chr3 | NM_020191    | MRPS22     | + | 140545550 | 140558577 |
| chr3 | NM_022497    | MRPS25     | - | 15065022  | 15081820  |
| chr3 | NM_018133    | MSL2       | - | 137350449 | 137397378 |
| chr3 | NM_020998    | MST1       | - | 49696383  | 49701200  |
| chr6 | NR_026805    | NCRNA00271 | + | 135860631 | 136053669 |
| chr6 | NM_014165    | NDUFAF4    | - | 97443907  | 97452488  |
| chr3 | NM_001185118 | MYNN       | + | 170973546 | 170990198 |
| chr3 | NM_025146    | NAA50      | - | 114917996 | 114947810 |
| chr6 | NM_001144962 | NFKBIL1    | + | 31622606  | 31634585  |
| chr6 | NM_002505    | NFYA       | + | 41148684  | 41178124  |
| chr3 | NM_001042540 | NCBP2      | - | 198146669 | 198153861 |
| chr6 | NM_016167    | NOL7       | + | 13723537  | 13729106  |
| chr3 | NM_001168331 | NDUFB4     | + | 121797817 | 121803948 |
| chr3 | NM_001199957 | NDUFB5     | + | 180805268 | 180824982 |
| chr3 | NM_001193533 | NEK4       | - | 52719835  | 52780005  |
| chr3 | NM_001145294 | NGLY1      | - | 25735438  | 25806534  |
| chr6 | NM_006703    | NUDT3      | - | 34363974  | 34468419  |
| chr3 | NM_032316    | NICN1      | - | 49434769  | 49441761  |
| chr6 | NM_005124    | NUP153     | - | 17723247  | 17814797  |
| chr6 | NM_198887    | NUP43      | - | 150087149 | 150109381 |
| chr6 | NM_138459    | NUS1       | + | 118103309 | 118138579 |
| chr3 | NM_020345    | NKIRAS1    | - | 23908575  | 23933541  |
| chr3 | NM_005385    | NKTR       | + | 42617150  | 42665237  |
| chr3 | NM_015938    | NMD3       | + | 162421792 | 162452489 |
| chr3 | NM_005793    | NME6       | - | 48310592  | 48317852  |
| chr3 | NM_006545    | NPRL2      | - | 50359922  | 50363490  |
| chr3 | NM_015560    | OPA1       | + | 194793626 | 194898294 |
| chr6 | NM_001197259 | ORC3       | + | 88356503  | 88433891  |
| chr6 | NM_017906    | PAK1IP1    | + | 10803173  | 10817956  |
| chr3 | NM_138381    | OXNAD1     | + | 16281670  | 16322598  |

|      |              |         |   |           |           |
|------|--------------|---------|---|-----------|-----------|
| chr3 | NM_001145391 | OXSM    | + | 25806566  | 25811029  |
| chr3 | NM_005109    | OXSRI   | + | 38182029  | 38271983  |
| chr6 | NM_003630    | PEX3    | + | 143813610 | 143853444 |
| chr6 | NM_000287    | PEX6    | - | 43039588  | 43054959  |
| chr3 | NM_001037639 | PARL    | - | 185029866 | 185085387 |
| chr3 | NM_001003931 | PARP3   | + | 51951400  | 51957923  |
| chr3 | NM_018313    | PBRM1   | - | 52554407  | 52694906  |
| chr3 | NM_020357    | PCNP    | + | 102775731 | 102795971 |
| chr6 | NM_017934    | PHIP    | - | 79700854  | 79844730  |
| chr3 | NM_005017    | PCYT1A  | - | 197449649 | 197498981 |
| chr3 | NM_145859    | PDCD10  | - | 168884388 | 168935345 |
| chr3 | NM_001162429 | PDCD6IP | + | 33815069  | 33886199  |
| chr3 | NM_177966    | PDE12   | + | 57517020  | 57522808  |
| chr6 | NM_181794    | PKIB    | + | 122834760 | 123089217 |
| chr3 | NM_004567    | PFKFB4  | - | 48530120  | 48569231  |
| chr3 | NM_001166304 | PIGX    | + | 197923641 | 197947273 |
| chr6 | NM_006502    | POLH    | + | 43651855  | 43696238  |
| chr6 | NM_016059    | PPIL1   | - | 36930583  | 36950778  |
| chr6 | NM_139126    | PPIL4   | - | 149867323 | 149908864 |
| chr6 | NM_001111298 | PPIL6   | - | 109818110 | 109869067 |
| chr6 | NM_021959    | PPP1R11 | + | 30142910  | 30146087  |
| chr3 | NM_001145319 | PLS1    | + | 143797918 | 143915195 |
| chr6 | NM_003913    | PRPF4B  | + | 3966567   | 4010216   |
| chr3 | NM_199420    | POLQ    | - | 122632962 | 122747543 |
| chr3 | NM_006232    | POLR2H  | + | 185563887 | 185569057 |
| chr6 | NM_001077497 | PRR3    | + | 30632464  | 30640452  |
| chr6 | NM_002793    | PSMB1   | - | 170686128 | 170704342 |
| chr3 | NM_002740    | PRKCI   | + | 171422913 | 171506464 |
| chr6 | NM_018292    | QRSL1   | + | 107184133 | 107222985 |
| chr6 | NM_016277    | RAB23   | - | 57161540  | 57195037  |
| chr3 | NM_014814    | PSMD6   | - | 63971270  | 63984160  |
| chr3 | NM_198402    | PTPLB   | - | 124696052 | 124786614 |
| chr3 | NM_015466    | PTPN23  | + | 47397494  | 47429935  |
| chr6 | NM_020320    | RARS2   | - | 88280814  | 88356454  |
| chr6 | NM_002904    | RDBP    | - | 32027842  | 32034843  |
| chr3 | NM_005051    | QARS    | - | 49108368  | 49117175  |
| chr3 | NM_017730    | QRICH1  | - | 49042145  | 49106508  |
| chr3 | NM_024638    | QTRTD1  | + | 115258300 | 115289958 |
| chr6 | NM_004761    | RGL2    | - | 33367408  | 33375154  |
| chr3 | NM_004162    | RAB5A   | + | 19963575  | 20001671  |
| chr3 | NM_004637    | RAB7A   | + | 129927668 | 130016331 |
| chr3 | NM_173825    | RABL3   | - | 121888217 | 121944074 |
| chr3 | NM_020165    | RAD18   | - | 8893879   | 8980159   |
| chr6 | NM_031480    | RIOK1   | + | 7335060   | 7363269   |
| chr3 | NM_002880    | RAF1    | - | 12600099  | 12680700  |
| chr3 | NM_002886    | RAP2B   | + | 154362718 | 154368953 |
| chr6 | NM_017909    | RMND1   | - | 151767681 | 151815009 |

|      |              |          |   |           |           |
|------|--------------|----------|---|-----------|-----------|
| chr6 | NM_030963    | RNF146   | + | 127629712 | 127651197 |
| chr3 | NM_013286    | RBM15B   | + | 51403738  | 51410376  |
| chr6 | NM_025236    | RNF39    | - | 30146021  | 30151607  |
| chr6 | NM_006913    | RNF5     | + | 32254139  | 32256548  |
| chr6 | NR_003129    | RNF5P1   | + | 32254209  | 32256545  |
| chr3 | NM_181573    | RFC4     | - | 187990375 | 188007178 |
| chr3 | NM_052859    | RFT1     | - | 53097540  | 53139510  |
| chr6 | NM_032194    | RPF2     | + | 111409983 | 111453487 |
| chr3 | NM_017819    | RG9MTD1  | + | 102763401 | 102767779 |
| chr6 | NM_198486    | RPL7L1   | + | 42955648  | 42962709  |
| chr3 | NM_001664    | RHOA     | - | 49371582  | 49424530  |
| chr3 | NM_022064    | RNF123   | + | 49701993  | 49733966  |
| chr3 | NM_001201370 | RNF7     | + | 142939740 | 142948335 |
| chr6 | NM_031924    | RSPH3    | - | 159318253 | 159341186 |
| chr3 | NM_000986    | RPL24    | - | 102882623 | 102888253 |
| chr3 | NM_000994    | RPL32    | - | 12851443  | 12858081  |
| chr3 | NR_003111    | RPL32P3  | - | 130584366 | 130600972 |
| chr6 | NM_032730    | RTN4IP1  | - | 107125595 | 107184066 |
| chr6 | NM_001007464 | RWDD1    | + | 116999275 | 117021129 |
| chr6 | NM_033411    | RWDD2A   | + | 83959750  | 83962975  |
| chr3 | NM_001098783 | RPP14    | + | 58267011  | 58280960  |
| chr6 | NM_021976    | RXRB     | - | 33269342  | 33276410  |
| chr3 | NM_004704    | RRP9     | - | 51942485  | 51950962  |
| chr6 | NM_052923    | SCAND3   | - | 28647385  | 28663091  |
| chr3 | NM_003707    | RUVBL1   | - | 129282489 | 129325361 |
| chr3 | NM_014016    | SACM1L   | + | 45705757  | 45761904  |
| chr6 | NM_020755    | SERINC1  | - | 122806191 | 122834651 |
| chr6 | NM_015491    | SFRS18   | - | 99954561  | 99979928  |
| chr6 | NM_145169    | SFT2D1   | - | 166653505 | 166675981 |
| chr3 | NR_003264    | SDHAP1   | - | 197171188 | 197201547 |
| chr3 | NR_003265    | SDHAP2   | + | 196870090 | 196900916 |
| chr3 | NR_024272    | SEC13    | - | 10317614  | 10337858  |
| chr6 | NM_001193267 | SIRT5    | + | 13682770  | 13722764  |
| chr6 | NM_006929    | SKIV2L   | + | 32034559  | 32045511  |
| chr3 | NM_021237    | SELK     | - | 53894265  | 53901029  |
| chr3 | NM_016275    | SELT     | + | 151803755 | 151830924 |
| chr3 | NM_021627    | SENP2    | + | 186786724 | 186831579 |
| chr3 | NM_014445    | SERP1    | - | 151742469 | 151747118 |
| chr3 | NM_001199252 | SGOL1    | - | 20177088  | 20202728  |
| chr6 | NM_001142540 | SLC35B3  | - | 8358299   | 8380793   |
| chr6 | NM_001077516 | SLC39A7  | + | 33276580  | 33280192  |
| chr6 | NM_001044305 | SMAP1    | + | 71434199  | 71628437  |
| chr6 | NM_003080    | SMPD2    | + | 109868623 | 109871815 |
| chr3 | NM_001104647 | SLC25A36 | + | 142143351 | 142181475 |
| chr6 | NR_002436    | SNORA33  | + | 133180050 | 133180183 |
| chr6 | NR_002435    | SNORD100 | + | 133179633 | 133179709 |
| chr6 | NR_002434    | SNORD101 | + | 133178138 | 133178211 |

|      |              |          |   |           |           |
|------|--------------|----------|---|-----------|-----------|
| chr3 | NM_001190992 | SLC33A1  | - | 157026994 | 157054942 |
| chr3 | NM_017945    | SLC35A5  | + | 113763584 | 113785693 |
| chr6 | NR_002745    | SNORD48  | + | 31911018  | 31911082  |
| chr6 | NR_002743    | SNORD50A | - | 86443730  | 86443805  |
| chr6 | NR_003044    | SNORD50B | - | 86444025  | 86444096  |
| chr6 | NR_003065    | SNORD84  | - | 31616856  | 31616934  |
| chr6 | NM_020468    | SNX14    | - | 86271933  | 86360348  |
| chr6 | NM_003795    | SNX3     | - | 108639409 | 108689157 |
| chr3 | NM_001002800 | SMC4     | + | 161600123 | 161635435 |
| chr3 | NR_002588    | SNORA4   | + | 187988095 | 187988232 |
| chr3 | NR_002586    | SNORA63  | + | 187987781 | 187987916 |
| chr6 | NM_003017    | SRSF3    | + | 36670067  | 36680222  |
| chr6 | NR_026717    | STK19    | + | 32046930  | 32057202  |
| chr3 | NR_002587    | SNORD2   | + | 187985278 | 187985348 |
| chr3 | NM_014041    | SPCS1    | + | 52714896  | 52717237  |
| chr3 | NM_001080415 | SR140    | + | 144203061 | 144262257 |
| chr3 | NM_007107    | SSR3     | - | 157740622 | 157755667 |
| chr6 | NM_005643    | TAF11    | - | 34953532  | 34963797  |
| chr6 | NM_003190    | TAPBP    | - | 33375449  | 33390142  |
| chr3 | NM_178862    | STT3B    | + | 31549494  | 31652560  |
| chr6 | NM_001143964 | TBC1D7   | - | 13413162  | 13436766  |
| chr6 | NM_001172085 | TBP      | + | 170705345 | 170723883 |
| chr3 | NM_001164674 | SUMF1    | - | 4377828   | 4483966   |
| chr3 | NM_006354    | TADA3    | - | 9796653   | 9809420   |
| chr3 | NM_001199198 | TBC1D23  | + | 101462375 | 101526784 |
| chr6 | NM_174910    | TCTE3    | - | 169882139 | 169893563 |
| chr3 | NM_001134415 | TBCCD1   | - | 187746549 | 187771026 |
| chr6 | NM_016614    | TDP2     | - | 24758183  | 24775094  |
| chr3 | NM_022171    | TCTA     | + | 49424642  | 49428913  |
| chr3 | NM_152773    | TCTEX1D2 | - | 197502486 | 197529556 |
| chr3 | NM_001129884 | TEX264   | + | 51680261  | 51713379  |
| chr6 | NM_016020    | TFB1M    | - | 155618955 | 155677309 |
| chr3 | NM_001007565 | TFG      | + | 101910823 | 101950500 |
| chr3 | NM_001128148 | TFRC     | - | 197260551 | 197293429 |
| chr6 | NM_014051    | TMEM14A  | + | 52643842  | 52659344  |
| chr6 | NM_001127711 | TMEM14B  | + | 10855980  | 10865200  |
| chr6 | NM_001165258 | TMEM14C  | + | 10831133  | 10839348  |
| chr3 | NM_001114092 | THUMPD3  | + | 9379716   | 9403475   |
| chr6 | NM_145316    | TMEM217  | - | 37287931  | 37333391  |
| chr6 | NM_001143958 | TMEM30A  | - | 76019357  | 76051352  |
| chr6 | NM_001134493 | TOMM6    | + | 41863158  | 41865612  |
| chr3 | NM_018447    | TMEM111  | - | 9980635   | 10003522  |
| chr3 | NM_007024    | TMEM115  | - | 50367183  | 50371943  |
| chr3 | NM_018266    | TMEM39A  | - | 120632390 | 120665161 |
| chr3 | NM_080652    | TMEM41A  | - | 186690082 | 186699539 |
| chr3 | NM_024334    | TMEM43   | + | 14141440  | 14160181  |
| chr3 | NM_007114    | TMF1     | - | 69151667  | 69184174  |

|      |              |           |   |           |           |
|------|--------------|-----------|---|-----------|-----------|
| chr6 | NM_021253    | TRIM39    | + | 30402599  | 30419485  |
| chr6 | NM_001031712 | TRMT11    | + | 126349268 | 126402113 |
| chr3 | NM_014820    | TOMM70A   | - | 101564996 | 101602915 |
| chr3 | NM_001068    | TOP2B     | - | 25614478  | 25680792  |
| chr3 | NM_001142646 | TPRA1     | - | 128774601 | 128792258 |
| chr6 | NM_016021    | UBE2J1    | - | 90093062  | 90119338  |
| chr3 | NM_182916    | TRNT1     | + | 3143599   | 3165706   |
| chr6 | NM_015255    | UBR2      | + | 42639737  | 42769221  |
| chr3 | NM_001145393 | TSEN2     | + | 12500930  | 12549820  |
| chr3 | NM_001042601 | TTC14     | + | 181802611 | 181811612 |
| chr6 | NM_001080481 | USP45     | - | 99986905  | 100069973 |
| chr6 | NM_006295    | VAR5      | - | 31853275  | 31871691  |
| chr6 | NM_001167733 | VAR52     | + | 30989960  | 31002214  |
| chr3 | NM_001128161 | UBP1      | - | 33404831  | 33456901  |
| chr6 | NM_022553    | VPS52     | - | 33326026  | 33347640  |
| chr6 | NM_016485    | VTA1      | + | 142510102 | 142583778 |
| chr6 | NM_001024934 | WASF1     | - | 110527714 | 110607900 |
| chr3 | NM_003365    | UQCRC1    | - | 48611435  | 48622102  |
| chr6 | NM_001164267 | WDR46     | - | 33354857  | 33365282  |
| chr3 | NM_001199161 | USP19     | - | 49120482  | 49133375  |
| chr6 | NM_020135    | WRNIP1    | + | 2710664   | 2730978   |
| chr3 | NM_003363    | USP4      | - | 49289580  | 49352540  |
| chr6 | NM_020750    | XPO5      | - | 43598045  | 43651790  |
| chr6 | NM_015388    | YIPF3     | - | 43587542  | 43592706  |
| chr6 | NM_152735    | ZBTB9     | + | 33530333  | 33533298  |
| chr3 | NM_001171904 | VPRBP     | - | 51408337  | 51509058  |
| chr3 | NM_020839    | WDR48     | + | 39068510  | 39112885  |
| chr6 | NM_019110    | ZKSCAN4   | - | 28320468  | 28327981  |
| chr6 | NM_003447    | ZNF165    | + | 28156460  | 28165319  |
| chr3 | NM_182627    | WDR53     | - | 197765455 | 197779810 |
| chr6 | NM_007149    | ZNF184    | - | 27526499  | 27548876  |
| chr3 | NM_019069    | WDR5B     | - | 123613389 | 123617572 |
| chr3 | NM_018031    | WDR6      | + | 49019640  | 49028390  |
| chr6 | NM_006298    | ZNF192    | + | 28217694  | 28233215  |
| chr6 | NM_001199479 | ZNF193    | + | 28301007  | 28309243  |
| chr6 | NM_015021    | ZNF292    | + | 87921987  | 88030125  |
| chr3 | NM_001145769 | XPC       | - | 14161648  | 14195176  |
| chr3 | NM_001042604 | XRN1      | - | 143508138 | 143649543 |
| chr6 | NM_001076781 | ZNF391    | + | 27464502  | 27477206  |
| chr6 | NM_003427    | ZNF76     | + | 35335487  | 35371738  |
| chr6 | NM_014596    | ZNRD1     | + | 30137014  | 30140665  |
| chr3 | NM_014415    | ZBTB11    | - | 102850972 | 102878678 |
| chr6 | NR_026751    | ZNRD1-AS1 | - | 30076766  | 30136940  |
| chr6 | NR_028077    | ZSCAN12   | - | 28454576  | 28475523  |
| chr3 | NM_022340    | ZFYVE20   | - | 15086583  | 15115659  |
| chr3 | NM_022470    | ZMAT3     | - | 180217706 | 180272350 |
| chr3 | NM_001024855 | ZNF197    | + | 44641514  | 44664967  |

|       |              |                 |   |           |           |
|-------|--------------|-----------------|---|-----------|-----------|
| chr3  | NM_003420    | ZNF35           | + | 44665236  | 44677287  |
| chr3  | NM_016089    | ZNF589          | + | 48257599  | 48287483  |
| chr3  | NM_001098414 | ZNF621          | + | 40541379  | 40556047  |
| chr3  | NM_016331    | ZNF639          | + | 180524244 | 180536014 |
| chr5  | NM_018046    | AGGF1           | + | 76361965  | 76396814  |
| chr5  | NM_001167595 | AMACR           | - | 34022847  | 34043977  |
| chr5  | NM_017747    | ANKHD1          | + | 139761582 | 139899625 |
| chr5  | NM_020690    | ANKHD1-EIF4EBP3 | + | 139761582 | 139909347 |
| chr20 | NM_005469    | ACOT8           | - | 43903766  | 43919455  |
| chr5  | NM_023039    | ANKRA2          | - | 72883780  | 72897267  |
| chr5  | NM_032290    | ANKRD32         | + | 93980146  | 94057329  |
| chr5  | NM_001284    | AP3S1           | + | 115205517 | 115277677 |
| chr5  | NM_006051    | APBB3           | - | 139918036 | 139924373 |
| chr5  | NM_001127511 | APC             | + | 112071100 | 112209834 |
| chr20 | NM_006420    | ARFGEF2         | + | 46971681  | 47086637  |
| chr20 | NM_015338    | ASXL1           | + | 30409807  | 30490783  |
| chr5  | NM_020801    | ARRDC3          | - | 90700296  | 90714905  |
| chr20 | NM_139321    | ATRN            | + | 3399664   | 3579769   |
| chr20 | NM_003600    | AURKA           | - | 54377851  | 54400758  |
| chr5  | NM_198150    | ARSK            | + | 94916580  | 94966562  |
| chr5  | NM_004707    | ATG12           | - | 115191792 | 115205447 |
| chr5  | NM_004045    | ATOX1           | - | 151102575 | 151118403 |
| chr20 | NM_001191    | BCL2L1          | - | 29715921  | 29774317  |
| chr5  | NM_007255    | B4GALT7         | + | 176959724 | 176969952 |
| chr20 | NM_001167820 | BLCAP           | - | 35579232  | 35589747  |
| chr5  | NM_001205    | BNIP1           | + | 172504050 | 172523996 |
| chr5  | NM_001159651 | BOD1            | - | 172966753 | 172976272 |
| chr5  | NM_139199    | BRD8            | - | 137503357 | 137542257 |
| chr5  | NM_023924    | BRD9            | - | 916849    | 945939    |
| chr5  | NM_018321    | BRIX1           | + | 34951576  | 34961545  |
| chr5  | NM_001037637 | BTF3            | + | 72830005  | 72837204  |
| chr20 | NM_017896    | C20orf11        | + | 61039885  | 61050272  |
| chr20 | NM_016470    | C20orf111       | - | 42258549  | 42272845  |
| chr20 | NM_001099407 | C20orf12        | - | 18312010  | 18395829  |
| chr5  | NM_152409    | C5orf24         | + | 134209268 | 134223324 |
| chr20 | NM_152503    | C20orf132       | - | 35163042  | 35241388  |
| chr5  | NM_022483    | C5orf28         | - | 43480110  | 43519749  |
| chr5  | NM_198566    | C5orf34         | - | 43522559  | 43551030  |
| chr5  | NM_153607    | C5orf41         | + | 172415960 | 172498897 |
| chr5  | NM_001048249 | C5orf43         | - | 60489292  | 60494059  |
| chr5  | NM_001093755 | C5orf44         | + | 64956313  | 64997710  |
| chr5  | NM_001017987 | C5orf45         | - | 179196871 | 179218446 |
| chr5  | NM_175921    | C5orf51         | + | 41940226  | 41957495  |
| chr20 | NM_001199534 | C20orf24        | + | 34667550  | 34674374  |
| chr20 | NM_015585    | C20orf26        | + | 19981157  | 20289346  |
| chr5  | NM_022090    | C5orf54         | - | 159752732 | 159759638 |
| chr20 | NM_018347    | C20orf29        | + | 3749202   | 3753954   |

|       |              |            |   |           |           |
|-------|--------------|------------|---|-----------|-----------|
| chr5  | NM_138464    | C5orf55    | - | 494642    | 496258    |
| chr20 | NM_020531    | C20orf3    | - | 24891579  | 24921425  |
| chr20 | NM_001009923 | C20orf30   | - | 5028483   | 5041733   |
| chr20 | NM_015511    | C20orf4    | + | 34287860  | 34308267  |
| chr20 | NM_016407    | C20orf43   | + | 54477053  | 54527349  |
| chr20 | NM_001039375 | C20orf7    | + | 13713671  | 13747067  |
| chr20 | NM_052865    | C20orf72   | + | 17897761  | 17919762  |
| chr5  | NM_001745    | CAMLG      | + | 134102104 | 134115742 |
| chr5  | NM_145265    | CCDC127    | - | 257874    | 271297    |
| chr5  | NM_017785    | CCDC99     | + | 168943215 | 168964359 |
| chr20 | NM_016082    | CDK5RAP1   | - | 31410305  | 31452998  |
| chr5  | NM_031966    | CCNB1      | + | 68498668  | 68509826  |
| chr5  | NM_001239    | CCNH       | - | 86725834  | 86744606  |
| chr20 | NM_007186    | CEP250     | + | 33506636  | 33563217  |
| chr5  | NM_012073    | CCT5       | + | 10303281  | 10319501  |
| chr20 | NM_176812    | CHMP4B     | + | 31862770  | 31905834  |
| chr5  | NM_001790    | CDC25C     | - | 137648857 | 137695415 |
| chr20 | NM_001198863 | CPNE1      | - | 33677366  | 33716292  |
| chr20 | NM_001316    | CSE1L      | + | 47096244  | 47146893  |
| chr20 | NM_001895    | CSNK2A1    | - | 411337    | 472482    |
| chr5  | NM_001799    | CDK7       | + | 68566377  | 68609013  |
| chr5  | NM_001113575 | CDKL3      | - | 133662013 | 133730664 |
| chr5  | NM_080656    | CDKN2AIPNL | - | 133765654 | 133775497 |
| chr5  | NM_022145    | CENPK      | - | 64849348  | 64894751  |
| chr5  | NM_001166226 | CEP120     | - | 122708477 | 122787185 |
| chr20 | NM_001033521 | CSTF1      | + | 54400833  | 54412989  |
| chr5  | NM_004365    | CETN3      | - | 89725284  | 89741359  |
| chr5  | NM_020666    | CLK4       | - | 177962270 | 177986660 |
| chr5  | NM_030782    | CLPTM1L    | - | 1370999   | 1398002   |
| chr20 | NM_023935    | DDR GK1    | - | 3119011   | 3133295   |
| chr5  | NM_015455    | CNOT6      | + | 179854022 | 179937959 |
| chr5  | NM_004779    | CNOT8      | + | 154218390 | 154236545 |
| chr5  | NM_030627    | CPEB4      | + | 173247936 | 173319919 |
| chr5  | NM_001031812 | CSNK1G3    | + | 122875691 | 122980363 |
| chr5  | NM_005869    | CWC27      | + | 64100510  | 64350346  |
| chr20 | NM_052951    | DNTTIP1    | + | 43853982  | 43873473  |
| chr20 | NM_003859    | DPM1       | - | 48984811  | 49008467  |
| chr20 | NM_001145315 | DSN1       | - | 34813607  | 34835644  |
| chr5  | NM_152624    | DCP2       | + | 112340331 | 112384566 |
| chr20 | NM_014183    | DYNLRB1    | + | 32567864  | 32592423  |
| chr5  | NM_016222    | DDX41      | - | 176871183 | 176876573 |
| chr5  | NM_014829    | DDX46      | + | 134122359 | 134194710 |
| chr20 | NM_001145025 | EDEM2      | - | 33166820  | 33198822  |
| chr5  | NM_019030    | DHX29      | - | 54587829  | 54639278  |
| chr20 | NM_003908    | EIF2S2     | - | 32139775  | 32163746  |
| chr5  | NM_014473    | DIMT1L     | - | 61720107  | 61735485  |
| chr20 | NM_001114089 | ENTPD6     | + | 25124338  | 25155360  |



|       |              |              |   |           |           |
|-------|--------------|--------------|---|-----------|-----------|
| chr20 | NM_015966    | ERGIC3       | + | 33593191  | 33608819  |
| chr20 | NM_016649    | ESF1         | - | 13642968  | 13713532  |
| chr20 | NM_022760    | FAM113A      | - | 2763970   | 2769332   |
| chr20 | NM_021826    | FASTKD5      | - | 3075164   | 3088532   |
| chr20 | NM_017671    | FERMT1       | - | 6003491   | 6052191   |
| chr20 | NM_001080472 | FITM2        | - | 42368610  | 42373303  |
| chr20 | NM_000801    | FKBP1A       | - | 1297620   | 1321816   |
| chr5  | NM_000082    | ERCC8        | - | 60205415  | 60276662  |
| chr5  | NM_004730    | ETF1         | - | 137869682 | 137906831 |
| chr20 | NM_000178    | GSS          | - | 32979896  | 33007262  |
| chr20 | NM_015666    | GTPBP5       | + | 60191475  | 60211205  |
| chr5  | NM_014613    | FAF2         | + | 175807961 | 175869681 |
| chr5  | NM_138348    | FAM105B      | + | 14717782  | 14752842  |
| chr5  | NM_018691    | FAM114A2     | - | 153351457 | 153398690 |
| chr5  | NM_205548    | FAM151B      | + | 79819555  | 79873962  |
| chr5  | NM_199133    | FAM173B      | - | 10279437  | 10303014  |
| chr20 | NM_006899    | IDH3B        | - | 2587040   | 2592843   |
| chr5  | NM_198507    | FAM174A      | + | 99899022  | 99950339  |
| chr20 | NM_016004    | IFT52        | + | 41652992  | 41709276  |
| chr5  | NM_001190946 | FAM193B      | - | 176879395 | 176914154 |
| chr5  | NM_001135647 | FAM53C       | + | 137701122 | 137713317 |
| chr5  | NM_024091    | FASTKD3      | - | 7912271   | 7922150   |
| chr5  | NM_030793    | FBXO38       | + | 147743738 | 147802592 |
| chr5  | NM_012176    | FBXO4        | + | 41961112  | 41977429  |
| chr5  | NM_001146032 | FCHO2        | + | 72287563  | 72422105  |
| chr5  | NM_020177    | FEM1C        | - | 114884506 | 114908490 |
| chr20 | NR_024594    | LOC100131496 | + | 45380652  | 45382905  |
| chr20 | NR_026885    | LOC100270804 | + | 18722692  | 18724709  |
| chr5  | NR_015360    | FLJ33630     | - | 127385142 | 127446665 |
| chr5  | NR_033932    | FLJ35946     | - | 98133221  | 98136688  |
| chr20 | NR_015432    | LOC388789    | + | 18496072  | 18498203  |
| chr20 | NR_027241    | LOC388796    | - | 36482652  | 36497432  |
| chr5  | NM_005754    | G3BP1        | + | 151131668 | 151165108 |
| chr20 | NR_027451    | LOC647979    | - | 34096953  | 34102296  |
| chr20 | NM_001003897 | MANBAL       | + | 35351464  | 35379077  |
| chr5  | NM_015465    | GEMIN5       | - | 154247168 | 154297969 |
| chr5  | NM_032380    | GFM2         | - | 74052786  | 74098798  |
| chr20 | NM_020746    | MAVS         | + | 3775448   | 3804762   |
| chr20 | NM_032485    | MCM8         | + | 5879297   | 5923831   |
| chr5  | NM_017676    | GIN1         | - | 102449602 | 102483741 |
| chr20 | NR_031699    | MIR1292      | + | 2581422   | 2581488   |
| chr5  | NM_152407    | GRPEL2       | + | 148705169 | 148714339 |
| chr20 | NR_030386    | MIR663       | - | 26136821  | 26136914  |
| chr20 | NM_170784    | MKKS         | - | 10333832  | 10362866  |
| chr20 | NM_014484    | MOCS3        | + | 49008769  | 49011227  |
| chr5  | NM_002109    | HARS         | - | 140033673 | 140051155 |
| chr20 | NM_020884    | MYH7B        | + | 33007364  | 33053901  |

|       |              |              |   |           |           |
|-------|--------------|--------------|---|-----------|-----------|
| chr5  | NM_012208    | HARS2        | + | 140051201 | 140059074 |
| chr20 | NM_016100    | NAA20        | + | 19945936  | 19962269  |
| chr20 | NM_152667    | NANP         | - | 25541572  | 25552648  |
| chr5  | NM_003883    | HDAC3        | - | 140980626 | 140996607 |
| chr20 | NM_022080    | NAPB         | - | 23303155  | 23350156  |
| chr20 | NM_020967    | NCOA5        | - | 44123032  | 44151987  |
| chr5  | NM_005340    | HINT1        | - | 130522773 | 130528933 |
| chr5  | NM_000859    | HMGCR        | + | 74668748  | 74693682  |
| chr5  | NM_014983    | HMGXB3       | + | 149360361 | 149412899 |
| chr5  | NM_001142556 | HMMR         | + | 162820094 | 162851530 |
| chr20 | NM_080749    | NEURL2       | - | 43950673  | 43953308  |
| chr20 | NM_001198989 | NFS1         | - | 33720023  | 33750701  |
| chr5  | NM_005520    | HNRNPH1      | - | 178973784 | 178983328 |
| chr5  | NM_002154    | HSPA4        | + | 132415560 | 132468608 |
| chr20 | NM_006392    | NOP56        | + | 2581253   | 2587039   |
| chr5  | NM_006083    | IK           | + | 140007567 | 140022249 |
| chr20 | NM_013248    | NXT1         | + | 23279372  | 23283408  |
| chr5  | NM_001190981 | IL6ST        | - | 55266681  | 55326578  |
| chr20 | NM_024960    | PANK2        | + | 3817485   | 3852502   |
| chr20 | NM_032521    | PARD6B       | + | 48781487  | 48803685  |
| chr20 | NM_022104    | PCIF1        | + | 43996723  | 44010069  |
| chr5  | NM_016048    | ISOC1        | + | 128458340 | 128477618 |
| chr20 | NM_030815    | PDRG1        | - | 29996418  | 30003544  |
| chr20 | NM_001164811 | PET117       | + | 18066498  | 18071812  |
| chr20 | NM_002623    | PFDN4        | + | 52257908  | 52269899  |
| chr20 | NM_002638    | PI3          | + | 43236953  | 43238599  |
| chr20 | NM_001184728 | PIGT         | + | 43478120  | 43488298  |
| chr5  | NM_016604    | KDM3B        | + | 137716183 | 137800615 |
| chr5  | NM_001142603 | KIAA0141     | + | 141283568 | 141301796 |
| chr20 | NM_007066    | PKIG         | + | 42593849  | 42681092  |
| chr5  | NM_015325    | KIAA0947     | + | 5475806   | 5543338   |
| chr5  | NM_001079684 | KIAA1191     | - | 175705671 | 175721415 |
| chr5  | NM_005733    | KIF20A       | + | 137542315 | 137551303 |
| chr5  | NM_001098511 | KIF2A        | + | 61637745  | 61717967  |
| chr5  | NM_007054    | KIF3A        | - | 132056221 | 132101164 |
| chr5  | NM_020117    | LARS         | - | 145472781 | 145542487 |
| chr20 | NM_006466    | POLR3F       | + | 18396032  | 18413286  |
| chr20 | NM_006242    | PPP1R3D      | - | 57945281  | 57948747  |
| chr5  | NM_006816    | LMAN2        | - | 176691168 | 176711491 |
| chr5  | NM_001007527 | LMBRD2       | - | 36139170  | 36187772  |
| chr5  | NM_005575    | LNPEP        | + | 96297101  | 96390871  |
| chr5  | NR_027435    | LOC100129716 | + | 90711919  | 90752288  |
| chr20 | NM_012469    | PRPF6        | + | 62082874  | 62134897  |
| chr5  | NR_034121    | LOC100131067 | - | 80569139  | 80633144  |
| chr5  | NR_026682    | LOC100268168 | - | 172314390 | 172318977 |
| chr5  | NR_015447    | LOC153684    | + | 43077992  | 43081127  |
| chr5  | NR_034107    | LOC257396    | + | 52441443  | 52446709  |

|       |              |             |   |           |           |
|-------|--------------|-------------|---|-----------|-----------|
| chr20 | NM_020336    | RALGAPB     | + | 36534899  | 36640918  |
| chr20 | NM_002895    | RBL1        | - | 35059591  | 35157824  |
| chr20 | NM_001198838 | RBM12       | - | 33700260  | 33716292  |
| chr20 | NM_001134337 | RNF24       | - | 3860068   | 3944216   |
| chr20 | NM_001135771 | RPN2        | + | 35240869  | 35303439  |
| chr20 | NM_021215    | RPRD1B      | + | 36095361  | 36154180  |
| chr20 | NM_001024    | RPS21       | + | 60395515  | 60396971  |
| chr20 | NM_032957    | RTEL1       | + | 61760090  | 61798045  |
| chr20 | NM_015474    | SAMHD1      | - | 34953640  | 35013660  |
| chr20 | NM_006363    | SEC23B      | + | 18436187  | 18490050  |
| chr5  | NM_173491    | LSM11       | + | 157103332 | 157116324 |
| chr5  | NM_181705    | LYRM7       | + | 130534539 | 130569018 |
| chr20 | NM_198941    | SERINC3     | - | 42558277  | 42584140  |
| chr5  | NM_014757    | MAML1       | + | 179092456 | 179136893 |
| chr5  | NM_203406    | MBLAC2      | - | 89789775  | 89806341  |
| chr5  | NM_022132    | MCCC2       | + | 70918870  | 70990286  |
| chr5  | NM_004270    | MED7        | - | 156498028 | 156502499 |
| chr5  | NM_001135037 | MFAP3       | + | 153398711 | 153417207 |
| chr5  | NM_001114617 | MGAT1       | - | 180150146 | 180169743 |
| chr20 | NM_016045    | SLMO2       | - | 57041594  | 57051296  |
| chr20 | NR_003239    | SNHG11      | + | 36508710  | 36512978  |
| chr20 | NR_003030    | SNORD12     | + | 47330626  | 47330716  |
| chr20 | NR_003695    | SNORD12B    | + | 47330256  | 47330359  |
| chr20 | NR_002433    | SNORD12C    | + | 47328888  | 47328967  |
| chr5  | NR_037428    | MIR3655     | + | 140007612 | 140007695 |
| chr5  | NR_037434    | MIR3661     | + | 133589346 | 133589442 |
| chr20 | NM_003091    | SNRPB       | - | 2390280   | 2399499   |
| chr20 | NM_003092    | SNRPB2      | + | 16658608  | 16670417  |
| chr20 | NM_152227    | SNX5        | - | 17870243  | 17897490  |
| chr20 | NM_006038    | SPATA2      | - | 47953335  | 47965487  |
| chr5  | NM_176806    | MOCOS2      | - | 52429651  | 52441355  |
| chr5  | NM_001014990 | MRPL22      | + | 154300825 | 154329164 |
| chr5  | NM_032479    | MRPL36      | - | 1851498   | 1852956   |
| chr5  | NM_015084    | MRPS27      | - | 71550991  | 71651840  |
| chr5  | NM_016640    | MRPS30      | + | 44844783  | 44851373  |
| chr20 | NM_006282    | STK4        | + | 43028533  | 43142007  |
| chr20 | NM_001001433 | STX16       | + | 56659733  | 56687988  |
| chr5  | NM_002454    | MTRR        | + | 7922216   | 7954235   |
| chr5  | NM_001010891 | MTX3        | - | 79308294  | 79322844  |
| chr20 | NM_001099791 | SYS1        | + | 43425153  | 43438856  |
| chr20 | NR_003189    | SYS1-DBNDD2 | + | 43425222  | 43472664  |
| chr20 | NM_144628    | TBC1D20     | - | 364123    | 391187    |
| chr5  | NM_030571    | NDFIP1      | + | 141468507 | 141514192 |
| chr5  | NM_001185012 | NDUFA2      | - | 140005131 | 140007554 |
| chr5  | NM_004553    | NDUFS6      | + | 1854495   | 1869167   |
| chr20 | NM_014742    | TM9SF4      | + | 30160969  | 30218722  |
| chr20 | NM_001162505 | TMEM189     | - | 48173680  | 48203742  |

|       |              |           |         |           |           |
|-------|--------------|-----------|---------|-----------|-----------|
| chr5  | NM_015384    | NIPBL     | +       | 36912617  | 37101678  |
| chr20 | NM_021156    | TMX4      | -       | 7909715   | 7948393   |
| chr5  | NM_016391    | NOP16     | -       | 175743837 | 175748146 |
| chr20 | NM_033550    | TP53RK    | -       | 44746410  | 44751683  |
| chr20 | NM_003288    | TPD52L2   | +       | 61967033  | 61993334  |
| chr20 | NM_012112    | TPX2      | +       | 29790564  | 29853264  |
| chr20 | NM_015638    | TRPC4AP   | -       | 33053867  | 33144279  |
| chr5  | NM_014886    | NSA2      | +       | 74098858  | 74108490  |
| chr20 | NM_014657    | TTI1      | -       | 36044836  | 36095247  |
| chr5  | NM_145266    | NUDCD2    | -       | 162813163 | 162819721 |
| chr20 | NM_001039199 | TTPAL     | +       | 42537960  | 42556658  |
| chr5  | NM_153485    | NUP155    | -       | 37327697  | 37406954  |
| chr20 | NM_007019    | UBE2C     | +       | 43874661  | 43879003  |
| chr20 | NM_021988    | UBE2V1    | -       | 48131067  | 48165901  |
| chr20 | NM_014948    | UBOX5     | -       | 3036218   | 3088540   |
| chr20 | NM_017859    | UCKL1     | -       | 62041625  | 62058244  |
| chr20 | NM_022575    | VPS16     | +       | 2769372   | 2795378   |
| chr5  | NM_016480    | PAIP2     | +       | 138705417 | 138733308 |
| chr5  | NM_024594    | PANK3     | -       | 167915205 | 167939192 |
| chr20 | NM_012255    | XRN2      | +       | 21231941  | 21318463  |
| chr20 | NM_001083113 | ZGPAT     | +       | 61809237  | 61837938  |
| chr5  | NM_018898    | PCDHAC1   | +       | 140286485 | 140372113 |
| chr20 | NM_001083330 | ZNF133    | +       | 18217120  | 18245640  |
| chr20 | NM_022095    | ZNF335    | -       | 44010698  | 44034240  |
| chr20 | NM_015655    | ZNF337    | -       | 25602850  | 25625469  |
| chr20 | NM_024325    | ZNF343    | -       | 2410466   | 2437778   |
| chr20 | NM_021035    | ZNFX1     | -       | 47295845  | 47328163  |
| chr20 | NM_080752    | ZSWIM3    | +       | 43919626  | 43941176  |
| chr2  | NM_022826    |           | 7-Mar + | 160277255 | 160333330 |
| chr2  | NM_001008491 |           | 2-Sep + | 241903395 | 241942114 |
| chr2  | NM_001087    | AAMP      | -       | 218837095 | 218843137 |
| chr2  | NM_004300    | ACP1      | +       | 254868    | 268282    |
| chr2  | NM_005721    | ACTR3     | +       | 114364006 | 114432637 |
| chr2  | NM_003183    | ADAM17    | -       | 9546861   | 9613368   |
| chr5  | NM_013232    | PDCD6     | +       | 324735    | 368089    |
| chr2  | NM_018269    | ADI1      | -       | 3480696   | 3502354   |
| chr2  | NM_001002243 | AFTPH     | +       | 64604942  | 64673642  |
| chr2  | NM_021831    | AGBL5     | +       | 27127994  | 27146994  |
| chr2  | NM_003659    | AGPS      | +       | 177965716 | 178116810 |
| chr5  | NM_002622    | PFDN1     | -       | 139604818 | 139662873 |
| chr5  | NM_005023    | PGGT1B    | -       | 114574425 | 114626468 |
| chr5  | NM_032177    | PHAX      | +       | 125964505 | 125990843 |
| chr5  | NM_014386    | PKD2L2    | +       | 137253023 | 137304055 |
| chr2  | NM_001104586 | ALS2CR8   | +       | 203485222 | 203559305 |
| chr2  | NM_022662    | ANAPC1    | -       | 112243110 | 112358212 |
| chr5  | NM_006622    | PLK2      | -       | 57785566  | 57791670  |
| chr2  | NR_027020    | ANKRD30BL | -       | 132621636 | 132732012 |

|      |              |          |   |           |           |
|------|--------------|----------|---|-----------|-----------|
| chr5 | NM_006467    | POLR3G   | + | 89806436  | 89846125  |
| chr2 | NM_016466    | ANKRD39  | - | 96877450  | 96887483  |
| chr5 | NM_000943    | PPIC     | - | 122386976 | 122400324 |
| chr2 | NM_018089    | ANKZF1   | + | 219802722 | 219809635 |
| chr5 | NM_002715    | PPP2CA   | - | 133560046 | 133589849 |
| chr5 | NM_015342    | PPWD1    | + | 64894886  | 64919126  |
| chr2 | NM_173545    | APLF     | + | 68548194  | 68660798  |
| chr5 | NM_024754    | PTCD2    | + | 71651955  | 71690936  |
| chr2 | NM_001037174 | ARL5A    | - | 152365725 | 152393255 |
| chr2 | NM_152522    | ARL6IP6  | + | 153282668 | 153326013 |
| chr2 | NM_152862    | ARPC2    | + | 218790118 | 218827316 |
| chr5 | NM_002853    | RAD1     | - | 34941122  | 34951537  |
| chr5 | NM_005732    | RAD50    | + | 131920514 | 132008212 |
| chr2 | NM_016115    | ASB3     | - | 53750620  | 53867650  |
| chr2 | NM_019048    | ASNSD1   | + | 190234369 | 190243802 |
| chr5 | NM_002887    | RARS     | + | 167846040 | 167878887 |
| chr5 | NM_018047    | RBM22    | - | 150050544 | 150060862 |
| chr5 | NM_018989    | RBM27    | + | 145563355 | 145648977 |
| chr5 | NM_001130029 | RELL2    | + | 140996700 | 141000815 |
| chr5 | NM_018343    | RIOK2    | - | 96522326  | 96544761  |
| chr5 | NM_018434    | RNF130   | - | 179315079 | 179431715 |
| chr5 | NM_014901    | RNF44    | - | 175886305 | 175897027 |
| chr5 | NM_016093    | RPL26L1  | + | 172319044 | 172329380 |
| chr5 | NM_001033503 | SAR1B    | - | 133964737 | 133996432 |
| chr5 | NM_004866    | SCAMP1   | + | 77692094  | 77812318  |
| chr5 | NM_004168    | SDHA     | + | 271355    | 309814    |
| chr5 | NM_021982    | SEC24A   | + | 134012377 | 134091500 |
| chr5 | NM_020796    | SEMA6A   | - | 115807149 | 115938450 |
| chr5 | NM_015360    | SKIV2L2  | + | 54639332  | 54757166  |
| chr5 | NM_006930    | SKP1     | - | 133519980 | 133540623 |
| chr5 | NM_032637    | SKP2     | + | 36187945  | 36219904  |
| chr5 | NM_003060    | SLC22A5  | + | 131733299 | 131759205 |
| chr5 | NM_138773    | SLC25A46 | + | 110102652 | 110126385 |
| chr5 | NM_022902    | SLC30A5  | + | 68425637  | 68461636  |
| chr5 | NM_080670    | SLC35A4  | + | 139924603 | 139928867 |
| chr5 | NM_006425    | SLU7     | - | 159761225 | 159778746 |
| chr5 | NM_001001419 | SMAD5    | + | 135496434 | 135546321 |
| chr5 | NR_002922    | SNORA13  | + | 111525080 | 111525213 |
| chr5 | NR_002591    | SNORD95  | - | 180602919 | 180602982 |
| chr5 | NR_002592    | SNORD96A | - | 180601423 | 180601495 |
| chr5 | NM_001127496 | SPRY4    | - | 141670175 | 141684804 |
| chr5 | NM_001047    | SRD5A1   | + | 6686499   | 6722675   |
| chr5 | NM_001077199 | SREK1    | + | 65475840  | 65512470  |
| chr5 | NM_173829    | SREK1IP1 | - | 64049733  | 64100252  |
| chr5 | NM_152546    | SRFBP1   | + | 121325554 | 121392194 |
| chr5 | NM_003135    | SRP19    | + | 112224891 | 112231503 |
| chr5 | NM_152295    | TARS     | + | 33476654  | 33503953  |

|      |              |          |   |           |           |
|------|--------------|----------|---|-----------|-----------|
| chr5 | NM_000356    | TCOF1    | + | 149717394 | 149760064 |
| chr5 | NM_017872    | THG1L    | + | 157090900 | 157099350 |
| chr5 | NM_030953    | TIGD6    | - | 149352875 | 149360410 |
| chr5 | NM_018502    | TMCO6    | + | 139999195 | 140005173 |
| chr5 | NM_181836    | TMED7    | - | 114976803 | 114989775 |
| chr5 | NM_017510    | TMED9    | + | 176951818 | 176955705 |
| chr5 | NM_153354    | TMEM161B | - | 87526778  | 87600421  |
| chr5 | NM_174909    | TMEM167A | - | 82384420  | 82409028  |
| chr5 | NM_001656    | TRIM23   | - | 64921262  | 64955943  |
| chr5 | NM_033549    | TRIM41   | + | 180582911 | 180595414 |
| chr5 | NM_032765    | TRIM52   | - | 180615991 | 180620725 |
| chr5 | NM_004237    | TRIP13   | + | 945968    | 971164    |
| chr5 | NM_014639    | TTC37    | - | 94825354  | 94916465  |
| chr5 | NM_003337    | UBE2B    | + | 133734768 | 133755698 |
| chr5 | NM_003339    | UBE2D2   | + | 138920934 | 138988202 |
| chr5 | NM_145049    | UBLCP1   | + | 158622666 | 158645626 |
| chr5 | NM_032175    | UTP15    | + | 72897353  | 72913550  |
| chr5 | NM_003374    | VDAC1    | - | 133335464 | 133368723 |
| chr5 | NR_026703    | VTRNA1-1 | + | 140071044 | 140071142 |
| chr5 | NM_139281    | WDR36    | + | 110455768 | 110494099 |
| chr5 | NM_018268    | WDR41    | - | 76763824  | 76824088  |
| chr5 | NM_017706    | WDR55    | + | 140024567 | 140030737 |
| chr5 | NM_001024947 | YIPF5    | - | 143517919 | 143530471 |
| chr5 | NM_001131035 | ZCCHC9   | + | 80633157  | 80644721  |
| chr5 | NM_016107    | ZFR      | - | 32390212  | 32480601  |
| chr5 | NM_001105251 | ZFYVE16  | + | 79739593  | 79811254  |
| chr5 | NM_144723    | ZMAT2    | + | 140060215 | 140066423 |
| chr5 | NM_001172831 | ZNF300   | - | 150254146 | 150264738 |
| chr5 | NM_012279    | ZNF346   | + | 176382302 | 176426351 |
| chr5 | NM_005649    | ZNF354A  | - | 178071127 | 178090309 |
| chr5 | NM_058230    | ZNF354B  | + | 178219559 | 178244030 |
| chr5 | NM_014594    | ZNF354C  | + | 178420212 | 178440297 |
| chr5 | NM_033414    | ZNF622   | - | 16504627  | 16518894  |
| chr5 | NM_001136116 | ZNF879   | + | 178383381 | 178393994 |
| chr4 | NM_181806    | AASDH    | - | 56899213  | 56948395  |
| chr4 | NM_001040876 | ABCE1    | + | 146238605 | 146270126 |
| chr4 | NM_001101667 | ACOX3    | - | 8418908   | 8493352   |
| chr4 | NM_001119    | ADD1     | + | 2815381   | 2901587   |
| chr4 | NM_014885    | ANAPC10  | - | 146135759 | 146238818 |
| chr4 | NM_181726    | ANKRD37  | + | 186554833 | 186558384 |
| chr4 | NM_020337    | ANKRD50  | - | 125804653 | 125853337 |
| chr4 | NM_001128426 | AP1AR    | + | 113372343 | 113410660 |
| chr4 | NM_007100    | ATP5I    | - | 656224    | 658127    |
| chr4 | NM_148894    | BOD1L    | - | 13179463  | 13238426  |
| chr4 | NM_032313    | C4orf14  | - | 57524272  | 57538583  |
| chr4 | NM_018392    | C4orf21  | - | 113679937 | 113777600 |
| chr4 | NM_152544    | C4orf23  | + | 8493431   | 8529182   |

|      |              |               |   |           |           |
|------|--------------|---------------|---|-----------|-----------|
| chr4 | NM_001039717 | C4orf29       | + | 129105910 | 129171905 |
| chr4 | NM_173487    | C4orf33       | + | 130234278 | 130253293 |
| chr4 | NM_174921    | C4orf34       | - | 39228940  | 39316876  |
| chr4 | NM_144645    | C4orf36       | - | 88016381  | 88032599  |
| chr4 | NM_153027    | C4orf39       | + | 166097549 | 166099723 |
| chr4 | NM_018352    | C4orf43       | + | 164635122 | 164661141 |
| chr4 | NM_001008393 | C4orf46       | - | 159807280 | 159812652 |
| chr4 | NM_032783    | CBR4          | - | 170145316 | 170168043 |
| chr4 | NM_004354    | CCNG2         | + | 78297380  | 78310237  |
| chr4 | NM_006835    | CCNI          | - | 78188198  | 78216149  |
| chr4 | NM_012118    | CCRN4L        | + | 140156392 | 140186543 |
| chr4 | NM_017632    | CDKN2AIP      | + | 184602782 | 184606043 |
| chr4 | NM_025009    | CEP135        | + | 56509793  | 56594284  |
| chr4 | NM_001008388 | CISD2         | + | 104009575 | 104033412 |
| chr4 | NM_001829    | CLCN3         | + | 170778296 | 170878732 |
| chr4 | NM_018366    | CNO           | + | 6768742   | 6770288   |
| chr4 | NM_017845    | COMMD8        | - | 47147567  | 47160433  |
| chr4 | NM_016129    | COPS4         | + | 84175262  | 84215995  |
| chr4 | NM_173827    | COX18         | - | 74139279  | 74154336  |
| chr4 | NM_001334    | CTSO          | - | 157064719 | 157094498 |
| chr4 | NM_017741    | DCAF16        | - | 17411375  | 17421479  |
| chr4 | NM_000788    | DCK           | + | 72078128  | 72115493  |
| chr4 | NM_001358    | DHX15         | - | 24138185  | 24195282  |
| chr4 | NR_033797    | DKFZP434I0714 | + | 153676865 | 153679865 |
| chr4 | NM_153702    | ELMOD2        | + | 141664761 | 141694374 |
| chr4 | NM_021204    | ENOPH1        | + | 83570749  | 83601268  |
| chr4 | NM_004453    | ETFDH         | + | 159812726 | 159849291 |
| chr4 | NM_001034194 | EXOSC9        | + | 122941921 | 122957626 |
| chr4 | NM_001145191 | FAM200B       | + | 15292449  | 15301168  |
| chr4 | NM_001193534 | FBXL5         | - | 15215104  | 15266133  |
| chr4 | NM_001134937 | FIP1L1        | + | 53938576  | 54020860  |
| chr4 | NM_004477    | FRG1          | + | 191098967 | 191121353 |
| chr4 | NM_203504    | G3BP2         | - | 76786976  | 76817691  |
| chr4 | NM_005255    | GAK           | - | 833064    | 916174    |
| chr4 | NM_018983    | GAR1          | + | 110956114 | 110965342 |
| chr4 | NM_138335    | GNPDA2        | - | 44398924  | 44423369  |
| chr4 | NM_001004056 | GRK4          | + | 2935140   | 3012272   |
| chr4 | NM_025196    | GRPEL1        | - | 7112680   | 7120701   |
| chr4 | NM_024751    | GSTCD         | + | 106849389 | 106988331 |
| chr4 | NM_021927    | GUF1          | + | 44375189  | 44397454  |
| chr4 | NM_024511    | HAUS3         | - | 2199893   | 2213658   |
| chr4 | NM_133636    | HELQ          | - | 84547522  | 84596049  |
| chr4 | NM_001003810 | HNRNPD        | - | 83493490  | 83514173  |
| chr4 | NM_014278    | HSPA4L        | + | 128922902 | 128973976 |
| chr4 | NM_001142471 | INTS12        | - | 106823233 | 106849330 |
| chr4 | NM_020894    | KIAA1530      | + | 1331103   | 1371837   |
| chr4 | NM_001145314 | KIAA1712      | + | 175441629 | 175491106 |

|      |              |              |   |           |           |
|------|--------------|--------------|---|-----------|-----------|
| chr4 | NM_016648    | LARP7        | + | 113777568 | 113798191 |
| chr4 | NM_012318    | LETM1        | - | 1783003   | 1827772   |
| chr4 | NM_006859    | LIAS         | + | 39137059  | 39155666  |
| chr4 | NM_001115007 | LIN54        | - | 84064780  | 84153064  |
| chr4 | NR_034075    | LOC100499177 | - | 84033628  | 84041093  |
| chr4 | NR_026968    | LOC285456    | - | 109678794 | 109761062 |
| chr4 | NR_027277    | LOC344967    | - | 39720931  | 39735214  |
| chr4 | NR_037630    | LOC645513    | + | 120595385 | 120640195 |
| chr4 | NR_015433    | LOC93622     | + | 6726721   | 6728675   |
| chr4 | NM_017816    | LYAR         | - | 4320329   | 4342797   |
| chr4 | NM_002358    | MAD2L1       | - | 121200024 | 121207461 |
| chr4 | NM_025205    | MED28        | + | 17225370  | 17235258  |
| chr4 | NM_020961    | METTL14      | + | 119826021 | 119851525 |
| chr4 | NM_001146069 | MFSD10       | - | 2902085   | 2906384   |
| chr4 | NM_024629    | MLF1IP       | - | 185852212 | 185892280 |
| chr4 | NM_172250    | MMAA         | + | 146759989 | 146800637 |
| chr4 | NM_020236    | MRPL1        | + | 79002828  | 79092968  |
| chr4 | NM_016067    | MRPS18C      | + | 84596141  | 84601953  |
| chr4 | NM_000253    | MTTP         | + | 100704262 | 100764177 |
| chr4 | NM_057175    | NAA15        | + | 140442125 | 140531385 |
| chr4 | NM_001128931 | NAF1         | - | 164267309 | 164307523 |
| chr4 | NM_022346    | NCAPG        | + | 17421622  | 17455585  |
| chr4 | NM_152995    | NFXL1        | - | 47544013  | 47611390  |
| chr4 | NM_024047    | NUDT9        | + | 88562758  | 88598523  |
| chr4 | NM_017426    | NUP54        | - | 77254840  | 77288679  |
| chr4 | NM_001079840 | OCIAD1       | + | 48527816  | 48558591  |
| chr4 | NM_006452    | PAICS        | + | 56996671  | 57022291  |
| chr4 | NM_005443    | PAPSS1       | - | 108754270 | 108860868 |
| chr4 | NM_004564    | PET112L      | - | 152811258 | 152901625 |
| chr4 | NM_001127178 | PIGG         | + | 482988    | 523320    |
| chr4 | NM_001042616 | PIGY         | - | 89661157  | 89663978  |
| chr4 | NM_001190799 | PLK4         | + | 129021465 | 129039827 |
| chr4 | NM_001201564 | PLRG1        | - | 155675598 | 155691035 |
| chr4 | NM_006903    | PPA2         | - | 106509682 | 106614676 |
| chr4 | NM_002703    | PPAT         | - | 56954285  | 56996602  |
| chr4 | NM_005038    | PPID         | - | 159849728 | 159864002 |
| chr4 | NM_138364    | PRMT10       | - | 148778982 | 148824730 |
| chr4 | NM_031296    | RAB33B       | + | 140594410 | 140616519 |
| chr4 | NM_001008925 | RCHY1        | - | 76623370  | 76658652  |
| chr4 | NM_001185010 | RNF4         | + | 2440592   | 2487384   |
| chr4 | NM_152682    | RWDD4        | - | 184797782 | 184817325 |
| chr4 | NM_003864    | SAP30        | + | 174528667 | 174535258 |
| chr4 | NM_005506    | SCARB2       | - | 77298917  | 77354059  |
| chr4 | NM_018115    | SDAD1        | - | 77090091  | 77131137  |
| chr4 | NM_001042734 | SEC24B       | + | 110574419 | 110681064 |
| chr4 | NM_014933    | SEC31A       | - | 83958837  | 84031443  |
| chr4 | NM_016955    | SEPSECS      | - | 24730724  | 24771302  |



|      |              |          |   |           |           |
|------|--------------|----------|---|-----------|-----------|
| chr4 | NM_030648    | SETD7    | - | 140646641 | 140697027 |
| chr4 | NR_002963    | SNORA24  | + | 119419792 | 119419923 |
| chr4 | NR_003016    | SNORA26  | + | 53274172  | 53274294  |
| chr4 | NM_144644    | SPATA4   | - | 177342718 | 177353816 |
| chr4 | NM_021928    | SPCS3    | + | 177478083 | 177490390 |
| chr4 | NM_006947    | SRP72    | + | 57028518  | 57064604  |
| chr4 | NM_016930    | STX18    | - | 4471596   | 4594676   |
| chr4 | NM_018317    | TBC1D19  | + | 26194643  | 26366015  |
| chr4 | NM_015130    | TBC1D9   | - | 141761385 | 141896921 |
| chr4 | NM_144721    | THAP6    | + | 76658677  | 76674260  |
| chr4 | NM_024672    | THAP9    | + | 84040860  | 84060308  |
| chr4 | NM_145720    | TIGD4    | - | 153909955 | 153920366 |
| chr4 | NM_032927    | TMEM128  | - | 4288169   | 4300835   |
| chr4 | NM_032326    | TMEM175  | + | 916261    | 942443    |
| chr4 | NM_018241    | TMEM184C | + | 148757988 | 148776122 |
| chr4 | NM_018126    | TMEM33   | + | 41631893  | 41657581  |
| chr4 | NM_181890    | UBE2D3   | - | 103936216 | 104009473 |
| chr4 | NM_018359    | UFSP2    | - | 186557687 | 186584133 |
| chr4 | NM_001184700 | UGDH     | - | 39176769  | 39205613  |
| chr4 | NM_003715    | USO1     | + | 76868852  | 76954390  |
| chr4 | NM_032557    | USP38    | + | 144325519 | 144362591 |
| chr4 | NM_020368    | UTP3     | + | 71773059  | 71775132  |
| chr4 | NM_005663    | WHSC2    | - | 1954240   | 1980757   |
| chr4 | NM_145291    | ZBTB49   | + | 4342824   | 4374414   |
| chr4 | NM_024936    | ZCCHC4   | + | 24923493  | 24981103  |
| chr4 | NM_003441    | ZNF141   | + | 321595    | 357691    |
| chr4 | NM_182524    | ZNF595   | + | 43226     | 78099     |
| chr9 | NM_033087    | ALG2     | - | 101018527 | 101024067 |
| chr9 | NM_013366    | ANAPC2   | - | 139189056 | 139202878 |
| chr9 | NM_001195248 | APTX     | - | 32962603  | 32991639  |
| chr9 | NM_030978    | ARPC5L   | + | 126671304 | 126679517 |
| chr9 | NM_001202403 | ASB6     | - | 131436703 | 131444269 |
| chr9 | NM_004888    | ATP6V1G1 | + | 116389814 | 116400973 |
| chr9 | NM_001010895 | C9orf102 | + | 97677720  | 97770943  |
| chr9 | NR_023390    | C9orf130 | - | 97608190  | 97678080  |
| chr9 | NM_016481    | C9orf156 | - | 99706592  | 99724673  |
| chr9 | NM_032937    | C9orf37  | - | 139629604 | 139633129 |
| chr9 | NM_017998    | C9orf40  | - | 76751318  | 76757622  |
| chr9 | NM_152420    | C9orf41  | - | 76787692  | 76833130  |
| chr9 | NM_152786    | C9orf43  | + | 115212842 | 115231700 |
| chr9 | NM_017832    | C9orf6   | + | 110736493 | 110743058 |
| chr9 | NM_152833    | C9orf69  | - | 138146247 | 138150552 |
| chr9 | NM_016520    | C9orf78  | - | 131629384 | 131637393 |
| chr9 | NM_001167575 | C9orf82  | - | 26830682  | 26882826  |
| chr9 | NM_182505    | C9orf85  | + | 73716242  | 73778191  |
| chr9 | NM_001195200 | CCDC107  | + | 35648286  | 35651500  |
| chr9 | NM_139286    | CDC26    | - | 115069111 | 115077690 |

|      |              |               |   |           |           |
|------|--------------|---------------|---|-----------|-----------|
| chr9 | NM_017913    | CDC37L1       | + | 4669565   | 4696594   |
| chr9 | NM_001195536 | CHMP5         | + | 33254876  | 33272067  |
| chr9 | NM_001827    | CKS2          | + | 91115932  | 91121438  |
| chr9 | NM_001076677 | CLTA          | + | 36180852  | 36202059  |
| chr9 | NM_016035    | COQ4          | + | 130124611 | 130136172 |
| chr9 | NM_000755    | CRAT          | - | 130896893 | 130912891 |
| chr9 | NM_006368    | CREB3         | + | 35722316  | 35727005  |
| chr9 | NM_024345    | DCAF10        | + | 37790789  | 37857665  |
| chr9 | NM_015397    | DCAF12        | - | 34076380  | 34116771  |
| chr9 | NM_022779    | DDX31         | - | 134459496 | 134535609 |
| chr9 | NM_001539    | DNAJA1        | + | 33015208  | 33029062  |
| chr9 | NM_001015882 | DNAJC25       | + | 113433452 | 113456452 |
| chr9 | NM_004125    | DNAJC25-GNG10 | + | 113433452 | 113472347 |
| chr9 | NM_001080849 | DNLZ          | - | 138376172 | 138378062 |
| chr9 | NM_004435    | ENDOG         | + | 130620599 | 130624776 |
| chr9 | NM_015051    | ERP44         | - | 101781283 | 101901151 |
| chr9 | NM_014285    | EXOSC2        | + | 132558978 | 132570273 |
| chr9 | NM_001002269 | EXOSC3        | - | 37770307  | 37775067  |
| chr9 | NM_016014    | FAM108B1      | - | 73667187  | 73715968  |
| chr9 | NM_138333    | FAM122A       | + | 70584783  | 70588429  |
| chr9 | NR_027294    | FAM201A       | + | 38611084  | 38613277  |
| chr9 | NM_004629    | FANCG         | - | 35063834  | 35070013  |
| chr9 | NM_012164    | FBXW2         | - | 122559074 | 122595561 |
| chr9 | NM_018998    | FBXW5         | - | 138954707 | 138958994 |
| chr9 | NM_015258    | FKBP15        | - | 114967620 | 115023462 |
| chr9 | NM_003934    | FUBP3         | + | 132444780 | 132503560 |
| chr9 | NM_015635    | GAPVD1        | + | 127063931 | 127167111 |
| chr9 | NM_002077    | GOLGA1        | - | 126680393 | 126743207 |
| chr9 | NM_012203    | GRHPR         | + | 37412706  | 37426986  |
| chr9 | NM_012204    | GTF3C4        | + | 134535548 | 134555291 |
| chr9 | NM_001122823 | GTF3C5        | + | 134895882 | 134923711 |
| chr9 | NM_017645    | HAUS6         | - | 19043140  | 19092902  |
| chr9 | NM_002140    | HNRNPK        | - | 85772817  | 85785389  |
| chr9 | NM_001039792 | HRCT1         | + | 35896188  | 35897138  |
| chr9 | NM_001195822 | HSDL2         | + | 114182009 | 114274506 |
| chr9 | NM_001099223 | IFT74         | + | 26937036  | 27052931  |
| chr9 | NM_003640    | IKBKAP        | - | 110669620 | 110736429 |
| chr9 | NM_014425    | INVS          | + | 101901331 | 102103247 |
| chr9 | NM_022755    | IPPK          | - | 94415286  | 94472368  |
| chr9 | NM_030940    | ISCA1         | - | 88069282  | 88087310  |
| chr9 | NM_004972    | JAK2          | + | 4975244   | 5118183   |
| chr9 | NM_014878    | KIAA0020      | - | 2794154   | 2834130   |
| chr9 | NM_194313    | KIF24         | - | 34242377  | 34319198  |
| chr9 | NR_034006    | LOC100132352  | + | 68116360  | 68138192  |
| chr9 | NR_027440    | LOC100272217  | - | 132442557 | 132444702 |
| chr9 | NR_027442    | LOC100288842  | + | 122595595 | 122600830 |
| chr9 | NR_027447    | LOC100289341  | - | 139099218 | 139101090 |

|      |              |              |   |           |           |
|------|--------------|--------------|---|-----------|-----------|
| chr9 | NR_036526    | LOC100499484 | + | 99040528  | 99099417  |
| chr9 | NR_036592    | LOC100506710 | + | 37069892  | 37080398  |
| chr9 | NR_024408    | LOC253039    | + | 122645140 | 122656472 |
| chr9 | NM_001100111 | LOC286238    | - | 90451913  | 90456895  |
| chr9 | NR_024496    | LOC442421    | + | 66234088  | 66242850  |
| chr9 | NR_036527    | LOC57653     | + | 99040528  | 99179398  |
| chr9 | NM_001127245 | LRRC8A       | + | 130684211 | 130720138 |
| chr9 | NM_001005373 | LRSAM1       | + | 129253585 | 129305601 |
| chr9 | NM_016219    | MAN1B1       | + | 139101237 | 139123460 |
| chr9 | NR_024872    | MCART1       | - | 37867571  | 37894350  |
| chr9 | NM_133640    | MED22        | - | 135197575 | 135204793 |
| chr9 | NM_014791    | MELK         | + | 36562904  | 36667679  |
| chr9 | NM_198469    | MORN5        | + | 123962010 | 124002188 |
| chr9 | NM_019051    | MRPL50       | - | 103192069 | 103200740 |
| chr9 | NM_016034    | MRPS2        | + | 137532303 | 137536340 |
| chr9 | NM_001173512 | MRRF         | + | 124066702 | 124125563 |
| chr9 | NM_024635    | NAA35        | + | 87745876  | 87827037  |
| chr9 | NM_002486    | NCBP1        | + | 99435525  | 99475850  |
| chr9 | NM_001144026 | NDOR1        | + | 139219939 | 139233634 |
| chr9 | NM_014222    | NDUFA8       | - | 123946158 | 123961919 |
| chr9 | NM_001199987 | NDUFB6       | - | 32543523  | 32563182  |
| chr9 | NM_022917    | NOL6         | - | 33451350  | 33463941  |
| chr9 | NM_017948    | NOL8         | - | 94099460  | 94127697  |
| chr9 | NM_001161    | NUDT2        | + | 34319503  | 34333696  |
| chr9 | NM_005085    | NUP214       | + | 132990801 | 133098912 |
| chr9 | NM_152850    | PIGO         | - | 35078684  | 35086598  |
| chr9 | NM_001031689 | PLAA         | - | 26893367  | 26937468  |
| chr9 | NM_015160    | PMPCA        | + | 138424936 | 138438034 |
| chr9 | NM_017443    | POLE3        | - | 115209339 | 115212850 |
| chr9 | NM_001077365 | POMT1        | + | 133368109 | 133389014 |
| chr9 | NM_001123355 | PPP6C        | - | 126948672 | 126992039 |
| chr9 | NM_004697    | PRPF4        | + | 115077794 | 115094877 |
| chr9 | NM_021154    | PSAT1        | + | 80101878  | 80134829  |
| chr9 | NM_002799    | PSMB7        | - | 126155564 | 126217542 |
| chr9 | NM_005047    | PSMD5        | - | 122618152 | 122645027 |
| chr9 | NM_001002913 | PTRH1        | - | 129516047 | 129517757 |
| chr9 | NM_016322    | RAB14        | - | 122980235 | 123004186 |
| chr9 | NM_002874    | RAD23B       | + | 109085364 | 109134291 |
| chr9 | NM_033117    | RBM18        | - | 124041654 | 124066964 |
| chr9 | NM_001100588 | RC3H2        | - | 124651552 | 124707383 |
| chr9 | NM_020385    | REXO4        | - | 135261006 | 135272985 |
| chr9 | NM_018339    | RFK          | - | 78190252  | 78199264  |
| chr9 | NM_001080496 | RGP1         | + | 35739276  | 35743264  |
| chr9 | NM_024945    | RMI1         | + | 85785456  | 85808807  |
| chr9 | NR_003051    | RMRP         | - | 35647747  | 35648015  |
| chr9 | NR_023344    | RNU6ATAC     | - | 136019382 | 136019507 |
| chr9 | NM_006570    | RRAGA        | + | 19039371  | 19041021  |

|      |              |          |   |           |           |
|------|--------------|----------|---|-----------|-----------|
| chr9 | NM_001039707 | SDCCAG3  | - | 138416194 | 138424875 |
| chr9 | NM_006808    | SEC61B   | + | 101024390 | 101032722 |
| chr9 | NM_024077    | SECISBP2 | + | 91123231  | 91164381  |
| chr9 | NM_147157    | SIGMAR1  | - | 34624718  | 34627768  |
| chr9 | NM_080546    | SLC44A1  | + | 107046749 | 107193503 |
| chr9 | NM_015110    | SMC5     | + | 72063697  | 72159609  |
| chr9 | NM_018225    | SMU1     | - | 33031849  | 33066714  |
| chr9 | NM_001039697 | SNAPC3   | + | 15412781  | 15451627  |
| chr9 | NR_024542    | SNHG7    | - | 138738866 | 138742457 |
| chr9 | NR_002447    | SNORD24  | + | 135206071 | 135206146 |
| chr9 | NR_000017    | SNORD36B | + | 135206769 | 135206840 |
| chr9 | NM_172312    | SPAG8    | - | 35797781  | 35802259  |
| chr9 | NM_006415    | SPTLC1   | - | 93833247  | 93917511  |
| chr9 | NM_003731    | SSNA1    | + | 139202874 | 139204643 |
| chr9 | NM_013442    | STOML2   | - | 35089888  | 35093154  |
| chr9 | NM_006753    | SURF6    | - | 135187372 | 135192868 |
| chr9 | NM_006289    | TLN1     | - | 35687333  | 35722392  |
| chr9 | NM_032928    | TMEM141  | + | 138805597 | 138807590 |
| chr9 | NM_053045    | TMEM203  | - | 139218355 | 139219911 |
| chr9 | NM_001001790 | TOMM5    | - | 37578411  | 37582636  |
| chr9 | NM_001195622 | TOPORS   | - | 32530541  | 32542626  |
| chr9 | NM_000113    | TOR1A    | - | 131615041 | 131626262 |
| chr9 | NM_015679    | TRUB2    | - | 130111216 | 130124518 |
| chr9 | NM_139246    | TSTD2    | - | 99402182  | 99435783  |
| chr9 | NM_144965    | TTC16    | + | 129518178 | 129533700 |
| chr9 | NM_007344    | TTF1     | - | 134240757 | 134272042 |
| chr9 | NM_018449    | UBAP2    | - | 33911690  | 34038947  |
| chr9 | NM_013438    | UBQLN1   | - | 85464697  | 85512988  |
| chr9 | NM_001135954 | UCK1     | - | 133389003 | 133396483 |
| chr9 | NM_001110303 | USP20    | + | 131637516 | 131683928 |
| chr9 | NM_052844    | WDR34    | - | 130435760 | 130458950 |
| chr9 | NM_017588    | WDR5     | + | 135991030 | 136014915 |
| chr9 | NM_138778    | WDR85    | - | 139569181 | 139593208 |
| chr9 | NM_000380    | XPA      | - | 99477011  | 99499512  |
| chr9 | NM_020924    | ZBTB26   | - | 124720198 | 124733600 |
| chr9 | NM_001135776 | ZBTB43   | + | 128607105 | 128640308 |
| chr9 | NM_006626    | ZBTB6    | - | 124710155 | 124715430 |
| chr9 | NM_032799    | ZDHHC12  | - | 130522969 | 130526229 |
| chr9 | NM_006336    | ZER1     | - | 130531887 | 130574019 |
| chr9 | NM_003408    | ZFP37    | - | 114843994 | 114858817 |
| chr9 | NM_031486    | ZNF484   | - | 94648171  | 94680111  |
| chr9 | NM_007135    | ZNF79    | + | 129226473 | 129247472 |
| chr8 | NM_174922    | ADCK5    | + | 145568538 | 145589261 |
| chr8 | NM_018361    | AGPAT5   | + | 6553285   | 6606429   |
| chr8 | NM_198401    | ANKRD46  | - | 101602175 | 101641188 |
| chr8 | NM_018120    | ARMC1    | - | 66677244  | 66709006  |
| chr8 | NM_004674    | ASH2L    | + | 38082167  | 38116385  |

|      |              |          |   |           |           |
|------|--------------|----------|---|-----------|-----------|
| chr8 | NM_014109    | ATAD2    | - | 124401271 | 124477886 |
| chr8 | NM_001695    | ATP6V1C1 | + | 104102423 | 104154461 |
| chr8 | NM_015878    | AZIN1    | - | 103907711 | 103945573 |
| chr8 | NM_004874    | BAG4     | + | 38153262  | 38187694  |
| chr8 | NM_004331    | BNIP3L   | + | 26296439  | 26326561  |
| chr8 | NM_018310    | BRF2     | - | 37820555  | 37826589  |
| chr8 | NM_023080    | C8orf33  | + | 146248627 | 146252220 |
| chr8 | NM_177965    | C8orf37  | - | 96326316  | 96350638  |
| chr8 | NM_001102401 | C8orf41  | - | 33475777  | 33490245  |
| chr8 | NM_001007090 | C8orf48  | + | 13468722  | 13470168  |
| chr8 | NM_016647    | C8orf55  | + | 143805622 | 143815352 |
| chr8 | NM_001099670 | C8orf59  | - | 86313539  | 86319895  |
| chr8 | NM_001100878 | C8orf73  | - | 144719505 | 144726071 |
| chr8 | NM_032847    | C8orf76  | - | 124301411 | 124322798 |
| chr8 | NR_026974    | C8orf77  | + | 146199000 | 146202236 |
| chr8 | NM_018246    | CCDC25   | - | 27646751  | 27686089  |
| chr8 | NM_152284    | CHMP4C   | + | 82807242  | 82834303  |
| chr8 | NM_017444    | CHRAC1   | + | 141590582 | 141596434 |
| chr8 | NM_013354    | CNOT7    | - | 17131110  | 17148758  |
| chr8 | NM_006837    | COP55    | - | 68117868  | 68137116  |
| chr8 | NM_013291    | CPSF1    | - | 145589253 | 145605541 |
| chr8 | NM_138496    | CYHR1    | - | 145646122 | 145661226 |
| chr8 | NM_015420    | DCAF13   | + | 104496117 | 104524856 |
| chr8 | NM_181787    | DPY19L4  | + | 95801278  | 95875252  |
| chr8 | NM_024094    | DSCC1    | - | 120915361 | 120937351 |
| chr8 | NM_001193557 | ENY2     | + | 110415727 | 110427365 |
| chr8 | NM_153332    | ERI1     | + | 8897723   | 8928259   |
| chr8 | NM_207006    | FAM83A   | + | 124263932 | 124291499 |
| chr8 | NM_174911    | FAM84B   | - | 127633864 | 127639893 |
| chr8 | NM_144963    | FAM91A1  | + | 124850062 | 124896871 |
| chr8 | NM_012162    | FBXL6    | - | 145549898 | 145552940 |
| chr8 | NM_172366    | FBXO16   | - | 28341847  | 28403703  |
| chr8 | NM_002027    | FNTA     | + | 43030598  | 43060088  |
| chr8 | NM_032664    | FUT10    | - | 33347885  | 33450206  |
| chr8 | NM_138465    | GLI4     | + | 144420981 | 144430476 |
| chr8 | NM_003801    | GPAA1    | + | 145209511 | 145213107 |
| chr8 | NM_024531    | GPR172A  | + | 145553032 | 145555754 |
| chr8 | NM_001135726 | HMBBOX1  | + | 28803829  | 28966161  |
| chr8 | NM_005836    | HRSP12   | - | 99183742  | 99198594  |
| chr8 | NM_018142    | INTS10   | + | 19719197  | 19753866  |
| chr8 | NM_001145159 | INTS9    | - | 28681093  | 28803617  |
| chr8 | NM_001077527 | JRK      | - | 143735875 | 143748403 |
| chr8 | NM_014846    | KIAA0196 | - | 126105684 | 126173243 |
| chr8 | NM_015496    | KIAA1429 | - | 95569180  | 95634922  |
| chr8 | NR_033902    | KIAA1967 | + | 22518089  | 22533928  |
| chr8 | NM_012472    | LRRC6    | - | 133653628 | 133756995 |
| chr8 | NM_014462    | LSM1     | - | 38140014  | 38153183  |

|      |              |           |   |           |           |
|------|--------------|-----------|---|-----------|-----------|
| chr8 | NM_032272    | MAF1      | + | 145231292 | 145234503 |
| chr8 | NM_032509    | MAK16     | + | 33462226  | 33478320  |
| chr8 | NM_005914    | MCM4      | + | 49036046  | 49052621  |
| chr8 | NM_080651    | MED30     | + | 118602145 | 118621682 |
| chr8 | NM_138431    | MFSD3     | + | 145705359 | 145707397 |
| chr8 | NR_029714    | MIR320A   | - | 22158419  | 22158501  |
| chr8 | NR_037404    | MIR3610   | - | 117956147 | 117956220 |
| chr8 | NM_014078    | MRPL13    | - | 121477263 | 121526828 |
| chr8 | NM_014175    | MRPL15    | + | 55210333  | 55223627  |
| chr8 | NM_022045    | MTBP      | + | 121526846 | 121605056 |
| chr8 | NM_015942    | MTERFD1   | - | 97320820  | 97342972  |
| chr8 | NM_015458    | MTMR9     | + | 11179409  | 11223064  |
| chr8 | NM_145201    | NAPRT1    | - | 144728097 | 144731656 |
| chr8 | NM_005005    | NDUFB9    | + | 125620523 | 125631408 |
| chr8 | NM_003580    | NSMAF     | - | 59658617  | 59734958  |
| chr8 | NM_032869    | NUDCD1    | - | 110322323 | 110415526 |
| chr8 | NM_016023    | OTUD6B    | + | 92151599  | 92168499  |
| chr8 | NM_018492    | PBK       | - | 27723056  | 27751268  |
| chr8 | NM_006197    | PCM1      | + | 17824645  | 17931737  |
| chr8 | NM_052937    | PCMTD1    | - | 52892692  | 52974288  |
| chr8 | NM_005034    | POLR2K    | + | 101232014 | 101235406 |
| chr8 | NM_001722    | POLR3D    | + | 22158563  | 22164625  |
| chr8 | NM_001009552 | PPP2CB    | - | 30762667  | 30789894  |
| chr8 | NM_005605    | PPP3CC    | + | 22354540  | 22454582  |
| chr8 | NM_014754    | PTDSS1    | + | 97343342  | 97415950  |
| chr8 | NM_014281    | PUF60     | - | 144970534 | 144983525 |
| chr8 | NM_006265    | RAD21     | - | 117927353 | 117956286 |
| chr8 | NM_012415    | RAD54B    | - | 95453363  | 95556486  |
| chr8 | NM_001083617 | RB1CC1    | - | 53697570  | 53789579  |
| chr8 | NM_203390    | RBM12B    | - | 94812903  | 94822400  |
| chr8 | NM_003821    | RIPK2     | + | 90839109  | 90872433  |
| chr8 | NM_007218    | RNF139    | + | 125556188 | 125570040 |
| chr8 | NR_003572    | RPL23AP53 | - | 148344    | 172318    |
| chr8 | NM_001172478 | RRM2B     | - | 103285904 | 103320522 |
| chr8 | NM_015169    | RRS1      | + | 67503816  | 67505522  |
| chr8 | NM_015356    | SCRIB     | - | 144945077 | 144969537 |
| chr8 | NM_032237    | SGK196    | + | 43067813  | 43097480  |
| chr8 | NM_030974    | SHARPIN   | - | 145225523 | 145231128 |
| chr8 | NM_030780    | SLC25A32  | - | 104480041 | 104496644 |
| chr8 | NR_002437    | SNORD54   | - | 57148951  | 57149014  |
| chr8 | NM_022133    | SNX16     | - | 82874372  | 82917076  |
| chr8 | NM_001146160 | TATDN1    | - | 125569915 | 125620510 |
| chr8 | NM_005648    | TCEB1     | - | 75021187  | 75046900  |
| chr8 | NM_024831    | TGS1      | + | 56848344  | 56900559  |
| chr8 | NM_018105    | THAP1     | - | 42810973  | 42817631  |
| chr8 | NM_016127    | TMEM66    | - | 30040172  | 30060191  |
| chr8 | NM_152417    | TMEM68    | - | 56813873  | 56848439  |

|      |              |               |   |           |           |
|------|--------------|---------------|---|-----------|-----------|
| chr8 | NM_003840    | TNFRSF10D     | - | 23049048  | 23077485  |
| chr8 | NM_014294    | TRAM1         | - | 71648006  | 71683248  |
| chr8 | NM_171982    | TRIM35        | - | 27198320  | 27224751  |
| chr8 | NM_017956    | TRMT12        | + | 125532228 | 125534447 |
| chr8 | NM_145003    | TSNARE1       | - | 143291347 | 143482448 |
| chr8 | NM_003313    | TSTA3         | - | 144765930 | 144770875 |
| chr8 | NM_014673    | TTC35         | + | 109525028 | 109568312 |
| chr8 | NM_003350    | UBE2V2        | + | 49083547  | 49137007  |
| chr8 | NM_005671    | UBXN8         | + | 30721231  | 30744062  |
| chr8 | NM_006294    | UQCRB         | - | 97308479  | 97317038  |
| chr8 | NM_032334    | UTP23         | + | 117847922 | 117856102 |
| chr8 | NM_025054    | VCPIP1        | - | 67705041  | 67742006  |
| chr8 | NM_001135694 | VDAC3         | + | 42368502  | 42382572  |
| chr8 | NM_016208    | VPS28         | - | 145619807 | 145624735 |
| chr8 | NM_001145152 | VPS37A        | + | 17148771  | 17199904  |
| chr8 | NM_015024    | XPO7          | + | 21833125  | 21920042  |
| chr8 | NM_152758    | YTHDF3        | + | 64243674  | 64287900  |
| chr8 | NM_015117    | ZC3H3         | - | 144590967 | 144694763 |
| chr8 | NM_001029976 | ZNF16         | - | 146126547 | 146147078 |
| chr8 | NM_001109689 | ZNF250        | - | 146073139 | 146097650 |
| chr8 | NM_138367    | ZNF251        | - | 145917102 | 145951775 |
| chr8 | NR_023392    | ZNF252        | - | 146169778 | 146199089 |
| chr8 | NM_030580    | ZNF34         | - | 145969304 | 145983529 |
| chr8 | NM_001082480 | ZNF623        | + | 144789515 | 144807043 |
| chr8 | NM_030895    | ZNF696        | + | 144444933 | 144453495 |
| chr8 | NM_001042510 | ZNF706        | - | 102278441 | 102287136 |
| chr8 | NM_001100598 | ZNF707        | + | 144838609 | 144849543 |
| chrX | NM_001130847 | AIFM1         | - | 129091018 | 129127542 |
| chrX | NM_001199818 | ARMCX5-GPRASP | + | 101740931 | 101859317 |
| chrX | NM_001011551 | C1GALT1C1     | - | 119643556 | 119648033 |
| chrX | NR_026551    | CA5BP         | + | 15602959  | 15631395  |
| chrX | NM_033018    | CDK16         | + | 46962471  | 46974338  |
| chrX | NM_001325    | CSTF2         | + | 99962003  | 99982579  |
| chrX | NM_144970    | CXorf38       | - | 40371116  | 40391763  |
| chrX | NM_001142463 | DKC1          | + | 153644224 | 153659158 |
| chrX | NM_001412    | EIF1AX        | - | 20052556  | 20069887  |
| chrX | NM_001415    | EIF2S3        | + | 23982985  | 24006851  |
| chrX | NM_001166699 | FAM104B       | - | 55186259  | 55204353  |
| chrX | NM_001078172 | FAM127B       | - | 134012628 | 134013887 |
| chrX | NM_012280    | FTSJ1         | + | 48219492  | 48229696  |
| chrX | NM_001042351 | G6PD          | - | 153412799 | 153428981 |
| chrX | NM_000169    | GLA           | - | 100539434 | 100549657 |
| chrX | NM_005334    | HCFC1         | - | 152866201 | 152890013 |
| chrX | NM_001135565 | HDHD1         | - | 6976960   | 7076231   |
| chrX | NM_001146702 | KDM5C         | - | 53237227  | 53271329  |
| chrX | NM_001170649 | LAS1L         | - | 64649186  | 64671411  |
| chrX | NR_027444    | LOC100133957  | + | 47403195  | 47404720  |

|      |              |              |   |           |           |
|------|--------------|--------------|---|-----------|-----------|
| chrX | NR_028443    | LOC100303728 | - | 118484023 | 118487111 |
| chrX | NR_015378    | LOC401588    | + | 46289871  | 46292614  |
| chrX | NM_015884    | MBTPS2       | + | 21767576  | 21813462  |
| chrX | NM_004541    | NDUFA1       | + | 118889761 | 118894657 |
| chrX | NM_024528    | NKAP         | - | 118943040 | 118961763 |
| chrX | NR_027131    | NKAPP1       | - | 119254335 | 119263150 |
| chrX | NM_001145408 | NONO         | + | 70419766  | 70437743  |
| chrX | NM_003611    | OFD1         | + | 13662752  | 13697401  |
| chrX | NM_181672    | OGT          | + | 70669636  | 70712472  |
| chrX | NM_000291    | PGK1         | + | 77246321  | 77268980  |
| chrX | NM_001142389 | PNPLA4       | - | 7826803   | 7855780   |
| chrX | NM_001167989 | PQBP1        | + | 48640138  | 48645366  |
| chrX | NM_007213    | PRAF2        | - | 48815761  | 48818606  |
| chrX | NM_002814    | PSMD10       | - | 107214092 | 107221504 |
| chrX | NM_006743    | RBM3         | + | 48317779  | 48321748  |
| chrX | NM_016024    | RBMX2        | + | 129363623 | 129374998 |
| chrX | NM_001031745 | RIBC1        | + | 53466614  | 53474782  |
| chrX | NM_006978    | RNF113A      | - | 118888522 | 118889819 |
| chrX | NM_000328    | RPGR         | - | 38013366  | 38071732  |
| chrX | NM_006306    | SMC1A        | - | 53417794  | 53466343  |
| chrX | NR_000011    | SNORA70      | + | 153281815 | 153281950 |
| chrX | NM_013346    | SNX12        | - | 70197512  | 70204956  |
| chrX | NM_032796    | SYAP1        | + | 16647627  | 16690728  |
| chrX | NM_152787    | TAB3         | - | 30755479  | 30817432  |
| chrX | NM_002536    | TBC1D25      | + | 48283018  | 48305941  |
| chrX | NM_152634    | TCEANC       | + | 13581227  | 13592168  |
| chrX | NM_001167947 | TIMM17B      | - | 48635673  | 48640370  |
| chrX | NM_003492    | TMEM187      | + | 152891184 | 152901840 |
| chrX | NM_001011658 | TRAPPC2      | - | 13640281  | 13662675  |
| chrX | NM_001168683 | TXLNG        | + | 16714475  | 16772563  |
| chrX | NM_001017980 | VMA21        | + | 150316314 | 150328494 |
| chrX | NM_001184965 | WDR44        | + | 117364063 | 117467951 |
| chrX | NM_007075    | WDR45        | - | 48819035  | 48845003  |
| chrX | NM_001178099 | ZNF182       | - | 47719193  | 47748338  |
| chrX | NM_152695    | ZNF449       | + | 134306361 | 134325004 |
| chrX | NM_001039891 | ZNF674       | - | 46242103  | 46289836  |
| chrX | NM_005089    | ZRSR2        | + | 15718494  | 15751303  |

### U snRNAs LOCI OCCUPIED BY BRCA1 AND PALB2

|       |              |              |   |          |          |
|-------|--------------|--------------|---|----------|----------|
| chr19 | U6           | U6           | + | 972520   | 972627   |
| chr17 | U104         | U104         | + | 59577169 | 59577249 |
| chr17 | U1-related   | U1-related   | - | 54091512 | 54091656 |
| chr17 | U1-related   | U1-related   | - | 54111885 | 54112050 |
| chr17 | U2-related   | U2-related   | - | 38800801 | 38800976 |
| chr17 | U3b2-related | U3b2-related | - | 54064021 | 54064196 |



|       |             |             |   |           |           |
|-------|-------------|-------------|---|-----------|-----------|
| chr16 | U60         | U60         | - | 2145024   | 2145107   |
| chr17 | U8          | U8          | - | 8017495   | 8017631   |
| chr12 | U4          | U4          | - | 119213945 | 119214089 |
| chr12 | U4          | U4          | - | 119215279 | 119215423 |
| chr22 | U12         | U12         | + | 41341193  | 41341343  |
| chr15 | U5A         | U5A         | + | 63375441  | 63375558  |
| chr15 | U5B-related | U5B-related | + | 63384067  | 63384184  |
| chr11 | U2          | U2          | - | 62365669  | 62365857  |
| chr11 | U25         | U25         | - | 62379612  | 62379679  |
| chr11 | U99         | U99         | + | 62189469  | 62189618  |
| chr10 | U2          | U2          | - | 103114594 | 103114782 |
| chr1  | U1          | U1          | - | 16713203  | 16713367  |
| chr1  | U1          | U1          | + | 17095061  | 17095225  |
| chr1  | U1          | U1          | - | 147490681 | 147490845 |
| chr1  | U11         | U11         | + | 28847698  | 28847833  |
| chr12 | U7          | U7          | + | 6923238   | 6923302   |
| chr3  | U2-related  | U2-related  | + | 73242832  | 73243020  |
| chr1  | U5A-related | U5A-related | - | 208614122 | 208614235 |
| chr1  | U5Ds        | U5Ds        | - | 44969327  | 44969427  |
| chr1  | U5E         | U5E         | + | 11890797  | 11890916  |
| chr1  | U5E-related | U5E-related | - | 11892449  | 11892569  |
| chr1  | U5E-related | U5E-related | - | 45058157  | 45058254  |
| chr1  | U5F         | U5F         | - | 44960044  | 44960160  |
| chr1  | U74         | U74         | - | 172103434 | 172103506 |
| chr20 | U106        | U106        | + | 47328888  | 47328967  |
| chr1  | U1-related  | U1-related  | + | 143245394 | 143245557 |
| chr1  | U1-related  | U1-related  | + | 144094113 | 144094277 |
| chr1  | U1-related  | U1-related  | - | 145022789 | 145022927 |
| chr1  | U1-related  | U1-related  | + | 146202375 | 146202531 |
| chr1  | U1-related  | U1-related  | - | 146273359 | 146273514 |
| chr1  | U1-related  | U1-related  | - | 147481793 | 147481922 |
| chr2  | U2-related  | U2-related  | - | 88096991  | 88097181  |
| chr2  | U4atac      | U4atac      | + | 122004925 | 122005055 |
| chr8  | U13         | U13         | + | 33490534  | 33490638  |

#### tRNAs AND ADDITIONAL RNAPIII LOCI OCCUPIED BY BRCA1

|       |             |             |   |           |           |
|-------|-------------|-------------|---|-----------|-----------|
| chrX  | tRNAVal-TAC | tRNAVal-TAC | - | 18602949  | 18603022  |
| chr1  | tRNAVal-CAC | tRNAVal-CAC | - | 159636113 | 159636186 |
| chr5  | tRNAVal-AAC | tRNAVal-AAC | - | 180577875 | 180577948 |
| chr8  | tRNATyr-GTA | tRNATyr-GTA | + | 67188776  | 67188865  |
| chr17 | tRNATrp-CCA | tRNATrp-CCA | + | 19352085  | 19352157  |
| chr14 | tRNAThr-TGT | tRNAThr-TGT | - | 20169158  | 20169231  |
| chr17 | tRNAThr-CGT | tRNAThr-CGT | + | 26901212  | 26901284  |
| chr16 | tRNAThr-CGT | tRNAThr-CGT | + | 14287250  | 14287322  |
| chr6  | tRNASer-TGA | tRNASer-TGA | - | 27581585  | 27581667  |
| chr6  | tRNASer-TGA | tRNASer-TGA | + | 27621446  | 27621528  |

|       |                |                |   |           |           |
|-------|----------------|----------------|---|-----------|-----------|
| chr10 | tRNASer-TGA    | tRNASer-TGA    | + | 69194266  | 69194348  |
| chr6  | tRNASer-AGA    | tRNASer-AGA    | + | 26435795  | 26435877  |
| chr6  | tRNASer-AGA    | tRNASer-AGA    | + | 27571571  | 27571653  |
| chr19 | tRNASec(e)-TCA | tRNASec(e)-TCA | - | 50673699  | 50673785  |
| chr14 | tRNAPro-TGG    | tRNAPro-TGG    | + | 20171004  | 20171076  |
| chr11 | tRNAPro-TGG    | tRNAPro-TGG    | - | 75624516  | 75624588  |
| chr16 | tRNAPro-TGG    | tRNAPro-TGG    | + | 3148923   | 3148995   |
| chr5  | tRNAPro-TGG    | tRNAPro-TGG    | - | 180548459 | 180548531 |
| chr1  | tRNAPro-CGG    | tRNAPro-CGG    | + | 165950585 | 165950657 |
| chr14 | tRNAPro-AGG    | tRNAPro-AGG    | - | 20151399  | 20151471  |
| chr12 | tRNAPhe-GAA    | tRNAPhe-GAA    | - | 123978341 | 123978414 |
| chr8  | tRNAMet-CAT    | tRNAMet-CAT    | - | 124238650 | 124238723 |
| chr6  | tRNAMet-CAT    | tRNAMet-CAT    | - | 26438507  | 26438579  |
| chr6  | tRNAMet-CAT    | tRNAMet-CAT    | - | 27668578  | 27668650  |
| chr17 | tRNAMet-CAT    | tRNAMet-CAT    | - | 78045885  | 78045957  |
| chr17 | tRNAMet-CAT    | tRNAMet-CAT    | - | 78045885  | 78045957  |
| chr17 | tRNAMet-CAT    | tRNAMet-CAT    | - | 78045885  | 78045957  |
| chr1  | tRNALys-TTT    | tRNALys-TTT    | - | 202742780 | 202742853 |
| chr11 | tRNALys-TTT    | tRNALys-TTT    | - | 59084383  | 59084456  |
| chr14 | tRNALeu-TAG    | tRNALeu-TAG    | + | 20163368  | 20163450  |
| chr16 | tRNALeu-TAG    | tRNALeu-TAG    | - | 22114532  | 22114614  |
| chr6  | tRNALeu-TAA    | tRNALeu-TAA    | + | 144579376 | 144579459 |
| chr16 | tRNALeu-CAG    | tRNALeu-CAG    | - | 55891892  | 55891975  |
| chr1  | tRNALeu-CAA    | tRNALeu-CAA    | + | 247134676 | 247134782 |
| chr6  | tRNALeu-CAA    | tRNALeu-CAA    | - | 27681395  | 27681503  |
| chr6  | tRNALeu-CAA    | tRNALeu-CAA    | - | 28971978  | 28972084  |
| chr6  | tRNALeu-CAA    | tRNALeu-CAA    | + | 29016808  | 29016913  |
| chr14 | tRNALeu-AAG    | tRNALeu-AAG    | + | 20148130  | 20148212  |
| chr2  | tRNAIle-TAT    | tRNAIle-TAT    | + | 42891179  | 42891272  |
| chr6  | tRNAIle-AAT    | tRNAIle-AAT    | + | 27763945  | 27764019  |
| chr1  | tRNAGly-TCC    | tRNAGly-TCC    | - | 144109220 | 144109292 |
| chr1  | tRNAGly-TCC    | tRNAGly-TCC    | - | 159676584 | 159676656 |
| chr1  | tRNAGly-TCC    | tRNAGly-TCC    | + | 159767526 | 159767598 |
| chr6  | tRNAGly-GCC    | tRNAGly-GCC    | - | 27978664  | 27978735  |
| chr21 | tRNAGly-GCC    | tRNAGly-GCC    | - | 17748977  | 17749048  |
| chr15 | tRNAGlu-TTC    | tRNAGlu-TTC    | - | 23878473  | 23878545  |
| chr13 | tRNAGlu-TTC    | tRNAGlu-TTC    | - | 44390061  | 44390133  |
| chr6  | tRNAGlu-CTC    | tRNAGlu-CTC    | + | 29057954  | 29058026  |
| chr17 | tRNAGln-TTG    | tRNAGln-TTG    | + | 44624888  | 44624960  |
| chr3  | tRNACys-GCA    | tRNACys-GCA    | - | 133433331 | 133433403 |
| chr12 | tRNAAsp-GTC    | tRNAAsp-GTC    | + | 97421411  | 97421483  |
| chr1  | tRNAAsn-GTT    | tRNAAsn-GTT    | + | 146467428 | 146467502 |
| chr1  | tRNAAsn-GTT    | tRNAAsn-GTT    | - | 147497193 | 147497267 |
| chr13 | tRNAAsn-GTT    | tRNAAsn-GTT    | - | 30146100  | 30146174  |
| chr10 | tRNAAsn-GTT    | tRNAAsn-GTT    | - | 22558443  | 22558517  |
| chr11 | tRNAArg-TCT    | tRNAArg-TCT    | + | 59075342  | 59075428  |
| chr17 | tRNAArg-CCT    | tRNAArg-CCT    | - | 70542120  | 70542193  |

|       |              |              |   |           |           |
|-------|--------------|--------------|---|-----------|-----------|
| chr16 | tRNAArg-CCT  | tRNAArg-CCT  | + | 3142901   | 3142974   |
| chr17 | tRNAArg-CCG  | tRNAArg-CCG  | - | 63446474  | 63446547  |
| chr16 | tRNAArg-CCG  | tRNAArg-CCG  | + | 3140675   | 3140748   |
| chr12 | tRNAAla-TGC  | tRNAAla-TGC  | - | 123972253 | 123972325 |
| chr12 | tRNAAla-TGC  | tRNAAla-TGC  | + | 123990464 | 123990536 |
| chr6  | tRNAAla-CGC  | tRNAAla-CGC  | + | 26661709  | 26661781  |
| chr6  | tRNAAla-CGC  | tRNAAla-CGC  | - | 28749591  | 28749663  |
| chr2  | tRNAAla-CGC  | tRNAAla-CGC  | + | 156965526 | 156965598 |
| chr6  | tRNAAla-AGC  | tRNAAla-AGC  | - | 26680070  | 26680143  |
| chr6  | tRNAAla-AGC  | tRNAAla-AGC  | - | 28914199  | 28914271  |
| chr1  | tRNAMet-CAT  | tRNAMet-CAT  | + | 151910349 | 151910421 |
| chr1  | tRNAGly-GCC  | tRNAGly-GCC  | - | 159760260 | 159760331 |
| chr6  | tRNAVal-CAC  | tRNAVal-CAC  | + | 26646260  | 26646333  |
| chr6  | tRNAMet-CAT  | tRNAMet-CAT  | + | 26394732  | 26394804  |
| chr6  | tRNALeu-CAG  | tRNALeu-CAG  | + | 26629414  | 26629497  |
| chr1  | tRNAAsn-GTT  | tRNAAsn-GTT  | + | 159776654 | 159776728 |
| chr16 | tRNAMet-CAT  | tRNAMet-CAT  | - | 85975128  | 85975201  |
| chr19 | tRNAGly-TCC  | tRNAGly-TCC  | + | 4675081   | 4675153   |
| chr2  | tRNAGlu-TTC  | tRNAGlu-TTC  | - | 130811170 | 130811242 |
| chr15 | tRNASer-GCT  | tRNASer-GCT  | - | 38673314  | 38673396  |
| chr8  | tRNASer-AGA  | tRNASer-AGA  | - | 96351060  | 96351142  |
| chr7  | tRNAArg-CCT  | tRNAArg-CCT  | + | 138675985 | 138676058 |
| chr17 | tRNAThr-AGT  | tRNAThr-AGT  | + | 8031202   | 8031276   |
| chr17 | tRNASer-AGA  | tRNASer-AGA  | - | 8070652   | 8070734   |
| chr17 | tRNAAsp-GTC  | tRNAAsp-GTC  | - | 8066280   | 8066352   |
| chr16 | tRNAGly-CCC  | tRNAGly-CCC  | - | 626736    | 626807    |
| chr11 | tRNASer-GCT  | tRNASer-GCT  | + | 65872166  | 65872248  |
| chr14 | tRNATyr-GTA  | tRNATyr-GTA  | + | 20221271  | 20221360  |
| chr17 | tRNAGln-CTG  | tRNAGln-CTG  | + | 7963794   | 7963866   |
| chr2  | tRNATyr-GTA  | tRNATyr-GTA  | + | 27127153  | 27127242  |
| chr6  | tRNATyr-GTA  | tRNATyr-GTA  | + | 26703080  | 26703169  |
| chr14 | U6           | U6           | + | 31741001  | 31741107  |
| chr14 | U6           | U6           | - | 31742120  | 31742226  |
| chr6  | 7SK_RNA      | 7SK_RNA      | + | 52968376  | 52968708  |
| chr5  | HVG-3        | HVG-3        | + | 140085927 | 140086015 |
| chr5  | HVG-2        | HVG-2        | + | 140078694 | 140078782 |
| chr5  | HVG-1        | HVG-1        | + | 140071044 | 140071142 |
| chr14 | SRP_RNA      | SRP_RNA      | - | 49399018  | 49399317  |
| chr14 | RNaseP_RNA   | RNaseP_RNA   | - | 19881070  | 19881410  |
| chr9  | RNaseMRP_RNA | RNaseMRP_RNA | - | 35647749  | 35648014  |
