# Supplementary material
Source: PubMed Central journal article supplement (PMC4194113)
Supplement: embj0033-0890-sd13.pdf [file embj0033-0890-sd13.pdf]

| gene      | FPKM values |          |          | log2 (FOLD CHANGE) |               |
|-----------|-------------|----------|----------|--------------------|---------------|
|           | CTRL sh     | BRCA1 sh | PALB2 sh | SCR/BRCA1          | SCR/PALB2     |
| ADAMTSL1  | 0.517399    | 0.420992 | 0.363279 | -0.2974820         | -0.510196     |
| ABCC3     | 14.9132     | 11.8178  | 12.5933  | -0.335632          | -0.243934     |
| ACADVL    | 23.1329     | 31.4046  | 24.3394  | 0.44103            | 0.0733459     |
| ACTB      | 649.158     | 690.491  | 538.527  | 0.0890537          | -0.26955      |
| ANXA1     | 299.078     | 290.704  | 342.908  | -0.0409707         | 0.1973        |
| ANXA2     | 745.809     | 751.599  | 774.053  | 0.0111577          | 0.0536271     |
| APOA1BP   | 21.0226     | 21.8666  | 28.9915  | 0.0567916          | 0.463693      |
| ARF1      | 197.139     | 186.288  | 157.539  | -0.0816826         | -0.323503     |
| ARFRP1    | 2.80756     | 2.1219   | 3.41352  | -0.40396           | 0.281944      |
| ARHGDI1   | 9.44957     | 9.48519  | 12.7786  | 0.00542775         | 0.435404      |
| ASAP1     | 13.1252     | 8.07094  | 8.5348   | -0.701532          | -0.620911     |
| ATF4      | 92.8574     | 93.7323  | 128.221  | 0.0135295          | 0.465542      |
| AVPI1     | 13.6277     | 17.6046  | 30.0727  | 0.369409           | 1.14191       |
| BGLAP     | 0.162403    | 0        | 0        | -1.79769e+308      | -1.79769e+308 |
| BICC1     | 26.2334     | 18.4872  | 16.1132  | -0.504875          | -0.703161     |
| BIRC3     | 117.476     | 26.3495  | 56.0663  | -2.15652           | -1.06716      |
| BRD2      | 26.316      | 24.0119  | 20.9494  | -0.132191          | -0.329031     |
| BTBD19    | 0.117822    | 0        | 0.112934 | -1.79769e+308      | -0.0611237    |
| BTG1      | 23.5036     | 19.4806  | 21.4546  | -0.270843          | -0.131593     |
| C10orf10  | 2.0362      | 0.467504 | 0.351041 | -2.12283           | -2.53617      |
| C12orf57  | 19.0873     | 24.7049  | 22.5437  | 0.372183           | 0.240113      |
| C12orf61  | 1.23054     | 0.944726 | 0.924375 | -0.381319          | -0.412736     |
| C14orf181 | 2.24806     | 1.86884  | 1.85811  | -0.266541          | -0.27485      |
| C19orf56  | 10.1045     | 10.7743  | 12.6594  | 0.0925866          | 0.325211      |
| C6orf226  | 0.108794    | 0.308775 | 0.718106 | 1.50495            | 2.72259       |
| C8orf39   | 4.82593     | 3.09953  | 3.53098  | -0.638759          | -0.450739     |
| CALR      | 271.208     | 309.861  | 211.367  | 0.192223           | -0.359651     |
| CANX      | 561.338     | 507.104  | 377.613  | -0.146588          | -0.571962     |
| CAPN2     | 117.212     | 134.136  | 88.9584  | 0.194585           | -0.397913     |
| CCNL1     | 21.3874     | 24.1791  | 16.828   | 0.177001           | -0.34589      |
| CDC42BP1  | 34.5008     | 35.3101  | 24.4398  | 0.033453           | -0.497397     |
| CEBPD     | 55.5622     | 35.4395  | 32.4937  | -0.648744          | -0.773944     |
| CHD2      | 22.8955     | 28.4323  | 18.8243  | 0.312465           | -0.282472     |
| CHMP1B    | 32.2058     | 25.567   | 25.575   | -0.333036          | -0.332588     |
| CITED2    | 19.9594     | 16.5785  | 24.8069  | -0.267753          | 0.313674      |
| CLDN1     | 22.0643     | 20.9655  | 9.06355  | -0.0736938         | -1.28357      |
| COL8A1    | 29.7568     | 22.7121  | 24.2431  | -0.389756          | -0.295642     |
| CRIM1     | 43.944      | 38.7927  | 34.5188  | -0.179882          | -0.348286     |
| CSF3      | 5.77384     | 1.58521  | 2.498    | -1.86486           | -1.20876      |
| CSNK1D    | 5.41024     | 4.99261  | 4.88316  | -0.115896          | -0.147875     |
| CTSB      | 57.4099     | 53.5957  | 49.0275  | -0.0991818         | -0.227706     |
| CXCL1     | 93.5125     | 27.3141  | 16.3194  | -1.77551           | -2.51857      |
| CXCL2     | 21.5517     | 11.7139  | 9.73977  | -0.879578          | -1.14584      |
| CXCL3     | 4.52886     | 2.2838   | 1.03528  | -0.987713          | -2.12912      |
| CYC1      | 65.5588     | 65.7144  | 80.6782  | 0.00342033         | 0.299388      |
| CYR61     | 7.77609     | 7.17085  | 5.58668  | -0.116902          | -0.477054     |
| DARC      | 6.18411     | 1.62333  | 2.69212  | -1.92961           | -1.19982      |
| DDIT3     | 1.19663     | 1.50854  | 0.565908 | 0.334169           | -1.08034      |
| DDIT4     | 88.7201     | 71.9767  | 135.682  | -0.301732          | 0.612901      |
| DDX5      | 124.939     | 151.045  | 114.787  | 0.273751           | -0.122263     |

|          |          |           |          |             |            |
|----------|----------|-----------|----------|-------------|------------|
| DMD      | 4.09782  | 7.08413   | 4.88022  | 0.789733    | 0.252087   |
| DOM3Z    | 2.47318  | 2.10764   | 2.3481   | -0.230737   | -0.074873  |
| DPYD     | 117.718  | 58.8375   | 65.3427  | -1.00053    | -0.849242  |
| DUSP1    | 117.367  | 69.7585   | 115.19   | -0.750583   | -0.0270025 |
| DUSP4    | 27.9362  | 19.6148   | 22.2797  | -0.510196   | -0.326407  |
| DUSP6    | 34.2439  | 36.1956   | 47.8371  | 0.0799693   | 0.482284   |
| EEF1A1   | 6211.16  | 5887.2    | 7232.5   | -0.0772823  | 0.219632   |
| EEF1B2   | 770.761  | 743.877   | 895.713  | -0.0512186  | 0.216753   |
| EEF2     | 629.865  | 535.527   | 704.225  | -0.234083   | 0.160994   |
| EFNA1    | 5.65729  | 4.42586   | 3.24028  | -0.354154   | -0.803993  |
| EID3     | 5.55085  | 4.40751   | 2.46772  | -0.332746   | -1.16953   |
| EIF1     | 35.5449  | 27.7914   | 38.4646  | -0.355003   | 0.113889   |
| EIF3G    | 82.3439  | 94.2144   | 101.995  | 0.194286    | 0.308763   |
| EIF4A1   | 463.994  | 454.725   | 519.636  | -0.0291132  | 0.163395   |
| EIF4A2   | 110.547  | 89.8843   | 87.9123  | -0.298512   | -0.330516  |
| EIF4EBP3 | 0.242975 | 0.0984873 | 0.545842 | -1.3028     | 1.16767    |
| ENO1     | 985.821  | 853.684   | 1115.04  | -0.207623   | 0.177703   |
| ERRF1    | 47.1006  | 28.7894   | 29.8394  | -0.710208   | -0.658527  |
| ETS2     | 23.9439  | 20.967    | 12.3502  | -0.191538   | -0.955128  |
| EXT1     | 17.5573  | 23.2125   | 14.7313  | 0.402832    | -0.253187  |
| EYS      | 1.15055  | 0.936465  | 1.05877  | -0.29702    | -0.119923  |
| FAM36A   | 22.1598  | 33.4789   | 31.0651  | 0.595309    | 0.48735    |
| FEM1B    | 39.6743  | 26.7024   | 44.505   | -0.571232   | 0.165763   |
| FKBP5    | 150.908  | 99.2441   | 167.675  | -0.604611   | 0.152002   |
| FLJ43663 | 12.0356  | 7.62736   | 4.98685  | -0.658049   | -1.2711    |
| FN1      | 717.111  | 941.033   | 488.954  | 0.392048    | -0.552498  |
| FNDC3B   | 30.6189  | 32.1031   | 15.8591  | 0.0682872   | -0.949117  |
| FOS      | 26.7331  | 28.343    | 33.6446  | 0.0843635   | 0.331747   |
| FOSL2    | 18.6635  | 13.5804   | 13.099   | -0.458689   | -0.51076   |
| FOXO1    | 25.8724  | 16.7581   | 17.3034  | -0.626551   | -0.580356  |
| FTH1     | 689.968  | 513.816   | 561.432  | -0.425278   | -0.297418  |
| FTL      | 163.187  | 211.448   | 161.915  | 0.37378     | -0.0112861 |
| GALNTL2  | 5.90121  | 1.71074   | 2.71213  | -1.78639    | -1.12158   |
| GAS5     | 221.315  | 217.18    | 224.855  | -0.0272112  | 0.0228922  |
| GCLC     | 26.812   | 49.4838   | 31.067   | 0.884077    | 0.212501   |
| GLUL     | 288.557  | 106.372   | 355.404  | -1.43974    | 0.300601   |
| GNB2L1   | 1141.46  | 1016.91   | 1405.75  | -0.166685   | 0.300455   |
| GNL3     | 99.8724  | 112.638   | 106.852  | 0.173535    | 0.097454   |
| GPC6     | 6.11356  | 6.08118   | 3.38984  | -0.00765998 | -0.850796  |
| H1FX     | 4.77709  | 4.00731   | 5.15341  | -0.253497   | 0.109395   |
| H2AFX    | 6.61872  | 6.35524   | 9.16168  | -0.0586062  | 0.46906    |
| H3F3B    | 186.924  | 135.889   | 198.925  | -0.460025   | 0.0897714  |
| HCFC1R1  | 4.3123   | 2.55881   | 5.30404  | -0.752987   | 0.298633   |
| HERPUD1  | 5.39725  | 9.27908   | 5.85893  | 0.781758    | 0.118413   |
| HES1     | 29.797   | 55.7268   | 34.6981  | 0.903204    | 0.21969    |
| HEXIM1   | 10.527   | 10.3356   | 8.92238  | -0.0264843  | -0.2386    |
| HIGD2A   | 22.264   | 19.3013   | 22.8293  | -0.206018   | 0.0361684  |
| HIST1H1C | 529.923  | 517.389   | 516.686  | -0.0345322  | -0.0364927 |
| HIST1H1D | 405.959  | 223.767   | 391.533  | -0.859337   | -0.052202  |
| HIST1H1E | 241.59   | 215.03    | 258.031  | -0.168023   | 0.0949851  |
| HIST1H2A | 232.706  | 258.639   | 238.319  | 0.152434    | 0.0343897  |
| HIST1H2A | 121.292  | 135.983   | 143.134  | 0.164944    | 0.238876   |

|          |         |         |         |            |            |
|----------|---------|---------|---------|------------|------------|
| HIST1H2A | 203.909 | 230.248 | 250.87  | 0.175267   | 0.299015   |
| HIST1H2A | 119.549 | 109.816 | 129.862 | -0.122519  | 0.119375   |
| HIST1H2A | 185.013 | 178.94  | 231.071 | -0.0481447 | 0.320714   |
| HIST1H2A | 28.0088 | 27.5832 | 26.8466 | -0.0220886 | -0.0611432 |
| HIST1H2B | 312.263 | 332.781 | 387.171 | 0.091814   | 0.310212   |
| HIST1H2B | 209.019 | 234.855 | 257.309 | 0.168137   | 0.29987    |
| HIST1H2B | 181.414 | 233.212 | 211.223 | 0.362351   | 0.219476   |
| HIST1H2B | 107.384 | 82.6543 | 115.467 | -0.377615  | 0.104706   |
| HIST1H3D | 40.1593 | 28.824  | 44.8419 | -0.478465  | 0.159113   |
| HIST1H3H | 45.1125 | 38.0016 | 49.9434 | -0.247466  | 0.146769   |
| HIST1H4B | 102.618 | 119.9   | 131.38  | 0.224551   | 0.356462   |
| HIST1H4C | 310.139 | 279.238 | 380.741 | -0.15142   | 0.295895   |
| HIST1H4D | 173.13  | 148.348 | 186.441 | -0.222865  | 0.106863   |
| HIST1H4E | 270.563 | 296.173 | 331.995 | 0.130474   | 0.295197   |
| HIST1H4H | 248.596 | 221.348 | 304.92  | -0.167485  | 0.294631   |
| HIST2H2A | 150.926 | 147.983 | 165.55  | -0.0284122 | 0.133423   |
| HIST2H2A | 466.049 | 543.024 | 489.796 | 0.220534   | 0.0716997  |
| HIST2H2B | 84.3972 | 78.3085 | 99.8481 | -0.108025  | 0.24254    |
| HIST3H2A | 133.82  | 131.834 | 144.863 | -0.0215684 | 0.114405   |
| HIST3H2B | 33.7691 | 23.2139 | 26.9251 | -0.540713  | -0.326753  |
| HIST4H4  | 54.4657 | 55.3728 | 76.2162 | 0.0238272  | 0.484748   |
| HMGA2    | 21.0416 | 10.7005 | 15.114  | -0.975561  | -0.477356  |
| HMGB3    | 35.7262 | 34.8888 | 47.2001 | -0.0342192 | 0.401806   |
| HNRNPA0  | 15.7232 | 16.1147 | 11.2847 | 0.0354816  | -0.478531  |
| HNRNPA1  | 331.024 | 219.267 | 415.667 | -0.594244  | 0.328493   |
| HNRNPA1  | 17.4306 | 13.6477 | 37.8587 | -0.352969  | 1.119      |
| HNRNPAB  | 47.4746 | 43.4362 | 51.7736 | -0.128258  | 0.125061   |
| HNRNPC   | 302.585 | 264.225 | 285.663 | -0.195576  | -0.0830275 |
| HNRNPU   | 165.882 | 122.431 | 145.712 | -0.438191  | -0.187032  |
| HNRPDL   | 119.951 | 117.378 | 136.423 | -0.0312804 | 0.18564    |
| HSP90AB1 | 583.604 | 542.615 | 520.903 | -0.105061  | -0.163976  |
| HSP90B1  | 237.602 | 206.598 | 173.699 | -0.201724  | -0.451963  |
| HSPA5    | 60.0208 | 77.8714 | 53.354  | 0.375632   | -0.169867  |
| HSPA9    | 335.541 | 317.194 | 326.338 | -0.0811233 | -0.0401208 |
| IER5     | 26.221  | 34.8112 | 27.9952 | 0.408827   | 0.0944582  |
| IL1A     | 16.0905 | 8.78731 | 6.84984 | -0.872719  | -1.23207   |
| IL8      | 177.214 | 40.9822 | 21.1449 | -2.11242   | -3.06711   |
| IMPDH2   | 167.51  | 150.87  | 232.766 | -0.15094   | 0.474636   |
| INHBA    | 2.86285 | 1.54225 | 1.09679 | -0.892415  | -1.38417   |
| IRF2BP2  | 20.4429 | 29.179  | 20.8594 | 0.513334   | 0.0291011  |
| IRF6     | 17.3894 | 40.8474 | 18.9333 | 1.23204    | 0.122719   |
| ITGB4    | 29.3185 | 42.7972 | 38.8729 | 0.545707   | 0.406957   |
| ITGB8    | 32.2907 | 18.2138 | 22.8921 | -0.826087  | -0.496268  |
| JUN      | 12.2995 | 13.7209 | 6.84546 | 0.157776   | -0.845377  |
| JUND     | 8.49017 | 9.89145 | 7.99583 | 0.220387   | -0.0865462 |
| KIAA0146 | 11.1214 | 11.8726 | 10.1853 | 0.0942966  | -0.126851  |
| KLF5     | 48.1076 | 47.3048 | 53.3398 | -0.0242783 | 0.148947   |
| KLF6     | 28.3109 | 26.4875 | 18.5609 | -0.0960438 | -0.609093  |
| KRT7     | 299.707 | 307.213 | 265.247 | 0.0356851  | -0.176217  |
| KYNU     | 240.199 | 231.848 | 157.885 | -0.0510483 | -0.605352  |
| LAMB1    | 60.8953 | 32.6115 | 49.9522 | -0.900949  | -0.285785  |
| LAMB3    | 47.4247 | 111.158 | 42.991  | 1.22891    | -0.141604  |

|          |           |            |           |            |             |
|----------|-----------|------------|-----------|------------|-------------|
| LAMC2    | 201.321   | 267.759    | 150.718   | 0.411436   | -0.417645   |
| LEAP2    | 2.0921    | 1.18889    | 0.956955  | -0.815339  | -1.12843    |
| LENG9    | 0.705758  | 2.03873    | 1.61915   | 1.53043    | 1.19799     |
| LEPROT   | 39.968    | 34.2561    | 25.0137   | -0.222487  | -0.676128   |
| LMNA     | 93.0262   | 101.626    | 95.2338   | 0.127559   | 0.0338365   |
| LOC10012 | 0.776059  | 0.137117   | 0.9046    | -2.50076   | 0.221112    |
| LOC10013 | 1.3077    | 2.29814    | 0.677864  | 0.813438   | -0.947961   |
| LOC10021 | 2.44097   | 2.19516    | 1.98351   | -0.153127  | -0.299403   |
| LOC10027 | 0.996205  | 1.09998    | 0.400281  | 0.142956   | -1.31543    |
| LOC10028 | 0.0854285 | 0.247042   | 0.196068  | 1.53197    | 1.19857     |
| LOC10028 | 3.64903   | 2.75864    | 2.73738   | -0.403555  | -0.414719   |
| LOC10028 | 1.25569   | 2.87399    | 2.37121   | 1.19458    | 0.917146    |
| LOC10028 | 2.82994   | 1.96053    | 1.65111   | -0.52953   | -0.777339   |
| LOC10050 | 29.7673   | 29.89      | 26.4115   | 0.00593278 | -0.172563   |
| LOC10050 | 23.3961   | 12.6936    | 25.4643   | -0.882169  | 0.122208    |
| LOC14841 | 3.1087    | 2.483      | 2.65871   | -0.324229  | -0.225585   |
| LOC28445 | 1.44941   | 1.15202    | 0.934511  | -0.331302  | -0.633183   |
| LOC39995 | 18.1858   | 18.7556    | 18.488    | 0.0445106  | 0.0237791   |
| LOC40093 | 2.04158   | 1.28322    | 2.27561   | -0.669924  | 0.156566    |
| LOC64258 | 103.033   | 221.016    | 277.262   | 1.10105    | 1.42815     |
| LOC64465 | 7.33591   | 4.35339    | 6.83721   | -0.752837  | -0.101569   |
| LOC64632 | 4.16911   | 2.83423    | 3.20448   | -0.556782  | -0.379648   |
| LPP      | 14.2295   | 12.0322    | 10.8691   | -0.241982  | -0.388654   |
| LRP1B    | 0.0240068 | 0.00639452 | 0.0107405 | -1.90854   | -1.16039    |
| LSMD1    | 7.84789   | 8.55016    | 9.72215   | 0.123645   | 0.30897     |
| MACROD2  | 0.187406  | 0.416164   | 0.12279   | 1.15099    | -0.609976   |
| MALAT1   | 1305.25   | 1835.85    | 1299.41   | 0.492121   | -0.00646724 |
| MCL1     | 247.374   | 198.871    | 249.494   | -0.314857  | 0.0123104   |
| MDM2     | 213.737   | 158.605    | 142.753   | -0.430402  | -0.582317   |
| METTL12  | 1.18691   | 1.44528    | 2.01021   | 0.284138   | 0.760136    |
| MGST1    | 120.501   | 129.36     | 128.267   | 0.102357   | 0.0901142   |
| MRFAP1   | 112.623   | 133.573    | 146.278   | 0.246128   | 0.377213    |
| MRPL34   | 7.43778   | 6.63725    | 10.3836   | -0.164287  | 0.481367    |
| MRPL53   | 20.6269   | 23.0646    | 28.3705   | 0.161154   | 0.459865    |
| MT1E     | 485.964   | 232.946    | 560.933   | -1.06086   | 0.20698     |
| MT2A     | 1063.78   | 606.314    | 1008.34   | -0.811066  | -0.077216   |
| MTRNR2L  | 5673.2    | 3868.56    | 5093.47   | -0.552365  | -0.155513   |
| MTRNR2L  | 0         | 45112.5    | 0         | 0          | 0           |
| MTRNR2L  | 20019.6   | 14287.9    | 19056.6   | -0.486625  | -0.0711224  |
| MTRNR2L  | 11126.4   | 10217.6    | 10712     | -0.12293   | -0.0547645  |
| MYC      | 117.66    | 84.5182    | 161.11    | -0.477292  | 0.453421    |
| MYL6     | 276.655   | 399.472    | 180.74    | 0.530006   | -0.614173   |
| MYO1B    | 183.543   | 86.131     | 75.3259   | -1.09151   | -1.2849     |
| NAMPT    | 201.512   | 74.2267    | 69.3556   | -1.44086   | -1.53878    |
| NAV2     | 6.82612   | 5.52875    | 6.84673   | -0.304113  | 0.00435087  |
| NCL      | 123.472   | 78.4873    | 118.817   | -0.653649  | -0.0554414  |
| NCRNA00  | 16.5567   | 10.7141    | 11.6198   | -0.627905  | -0.510834   |
| NCRNA00  | 40.2702   | 22.1297    | 47.2504   | -0.86373   | 0.230614    |
| NCRNA00  | 206.944   | 155.638    | 262.054   | -0.411043  | 0.340623    |
| NEAT1    | 27.7442   | 23.6349    | 13.2748   | -0.231269  | -1.0635     |
| NFE2L2   | 32.5449   | 40.2636    | 28.9066   | 0.307044   | -0.171032   |
| NFKBIA   | 80.7975   | 41.1245    | 42.7579   | -0.974312  | -0.918119   |

|          |          |          |          |              |            |
|----------|----------|----------|----------|--------------|------------|
| NFKBIZ   | 35.3592  | 15.8192  | 15.2813  | -1.16041     | -1.21032   |
| NNMT     | 181.801  | 144.836  | 191.226  | -0.327937    | 0.0729246  |
| NPM1     | 1786.97  | 1504.18  | 2253.76  | -0.248544    | 0.334814   |
| NR1D1    | 0.549102 | 0.297077 | 1.08728  | -0.886237    | 0.98558    |
| ODF3B    | 0        | 0.202039 | 0        | 1.79769e+308 | 0          |
| OVCA2    | 23.4463  | 25.7172  | 28.8518  | 0.133376     | 0.299301   |
| P2RY11   | 0.35568  | 0.285652 | 0.291572 | -0.316317    | -0.286728  |
| PCBP1    | 13.959   | 18.4093  | 15.7781  | 0.399244     | 0.176737   |
| PCNXL2   | 9.45402  | 10.7805  | 6.8825   | 0.189418     | -0.457995  |
| PDE4D    | 21.0735  | 32.4874  | 20.0342  | 0.624451     | -0.072964  |
| PDE4DIP  | 26.9253  | 46.5846  | 21.8295  | 0.790891     | -0.30268   |
| PDF      | 6.44438  | 5.14801  | 5.4523   | -0.324027    | -0.241176  |
| PDK4     | 9.15677  | 5.17187  | 6.47141  | -0.824154    | -0.500758  |
| PER1     | 2.49956  | 2.41989  | 2.76166  | -0.0467294   | 0.14386    |
| PID1     | 44.6819  | 17.1562  | 29.3643  | -1.38097     | -0.605631  |
| PIK3R1   | 75.2915  | 54.8726  | 64.7734  | -0.456402    | -0.217085  |
| PNRC1    | 91.414   | 72.0805  | 80.5082  | -0.342805    | -0.18328   |
| PNRC2    | 81.5116  | 101.25   | 92.5992  | 0.312845     | 0.183994   |
| PPP1R10  | 14.6091  | 13.1405  | 14.3354  | -0.152847    | -0.0272896 |
| PPP1R15A | 17.1034  | 10.0226  | 11.3119  | -0.771023    | -0.596435  |
| PPP1R15E | 18.2822  | 31.0265  | 15.0302  | 0.763065     | -0.282576  |
| PRDM1    | 5.26135  | 2.72219  | 1.61504  | -0.950667    | -1.70387   |
| PSIMCT-1 | 6.83564  | 4.87104  | 4.87226  | -0.488847    | -0.488484  |
| PSMB10   | 9.49024  | 6.92224  | 9.56772  | -0.455206    | 0.0117302  |
| PSMB4    | 108.094  | 112.298  | 102.946  | 0.0550437    | -0.0703957 |
| PSMD7    | 36.2527  | 38.0192  | 35.4023  | 0.068638     | -0.0342466 |
| PTK2     | 46.4926  | 42.5605  | 40.8321  | -0.127487    | -0.187297  |
| PTP4A1   | 46.6827  | 77.0775  | 48.5563  | 0.723423     | 0.0567718  |
| PTPN14   | 28.9349  | 22.0857  | 12.6977  | -0.389698    | -1.18825   |
| PTPRG    | 18.9391  | 11.356   | 13.4247  | -0.737909    | -0.496476  |
| PTPRM    | 24.4169  | 22.993   | 18.802   | -0.0866872   | -0.376996  |
| PVT1     | 10.3096  | 7.6289   | 8.85982  | -0.43444     | -0.218639  |
| RAB26    | 1.33031  | 1.14263  | 1.82774  | -0.219406    | 0.458298   |
| RABGGTB  | 96.6506  | 119.326  | 90.14    | 0.304063     | -0.100612  |
| RBM39    | 114.439  | 117.697  | 114.668  | 0.0405028    | 0.00287963 |
| RBMS3    | 24.0235  | 17.5689  | 16.3456  | -0.451422    | -0.555543  |
| RGS2     | 60.641   | 33.7525  | 58.3601  | -0.845299    | -0.0553115 |
| RND3     | 29.9129  | 47.2963  | 26.7955  | 0.660956     | -0.158778  |
| RNF145   | 55.6311  | 36.5144  | 37.0466  | -0.607427    | -0.586549  |
| ROMO1    | 37.4315  | 51.7181  | 37.9979  | 0.466419     | 0.0216674  |
| RPL10    | 92.3096  | 84.3509  | 118.643  | -0.130076    | 0.362081   |
| RPL10A   | 480.509  | 488.07   | 618.75   | 0.0225224    | 0.364792   |
| RPL11    | 935.978  | 815.042  | 1144.57  | -0.1996      | 0.290255   |
| RPL12    | 1344.56  | 1300.81  | 1620.72  | -0.0477182   | 0.269502   |
| RPL13    | 296.931  | 276.584  | 354.255  | -0.102413    | 0.25466    |
| RPL13AP5 | 935.986  | 1036.22  | 1257.16  | 0.146769     | 0.425609   |
| RPL15    | 403.796  | 359.022  | 508.166  | -0.169554    | 0.331674   |
| RPL17    | 1686.28  | 1764.82  | 2224.89  | 0.065672     | 0.399886   |
| RPL18A   | 23.7628  | 8.86694  | 48.7123  | -1.4222      | 1.03558    |
| RPL18AP3 | 368.858  | 401.125  | 439.302  | 0.120986     | 0.252148   |
| RPL21    | 206.533  | 145.683  | 429.724  | -0.503543    | 1.05704    |
| RPL21P28 | 663.598  | 761.288  | 626.073  | 0.198132     | -0.0839799 |

|         |          |          |          |            |            |
|---------|----------|----------|----------|------------|------------|
| RPL22L1 | 46.306   | 48.4308  | 73.5547  | 0.0647248  | 0.667618   |
| RPL23   | 1223.68  | 1293.6   | 1593.4   | 0.0801646  | 0.380878   |
| RPL23A  | 643.904  | 673.938  | 717.205  | 0.06577    | 0.15554    |
| RPL27   | 1206.73  | 1322.3   | 1491.59  | 0.131946   | 0.30575    |
| RPL27A  | 88.546   | 91.6756  | 124.824  | 0.050111   | 0.495393   |
| RPL3    | 540.267  | 501.005  | 816.056  | -0.108847  | 0.594995   |
| RPL30   | 787.68   | 995.96   | 1022.83  | 0.338479   | 0.376888   |
| RPL35   | 591.707  | 670.763  | 727.957  | 0.180922   | 0.298971   |
| RPL35A  | 931.526  | 957.642  | 1159.73  | 0.0398896  | 0.316122   |
| RPL36   | 447.441  | 427.238  | 554.522  | -0.0666568 | 0.309546   |
| RPL37   | 487.326  | 509.836  | 583.308  | 0.0651466  | 0.259372   |
| RPL37A  | 911.193  | 1117.24  | 1130.95  | 0.294108   | 0.311702   |
| RPL38   | 1987.86  | 2359.74  | 2349.92  | 0.24741    | 0.241394   |
| RPL4    | 1283.54  | 1301.34  | 1629.37  | 0.0198792  | 0.344187   |
| RPL41   | 1078.07  | 1155.96  | 1513.33  | 0.100644   | 0.489278   |
| RPL5    | 734.904  | 607.071  | 828.053  | -0.27569   | 0.172168   |
| RPL6    | 907.309  | 726.855  | 1087.39  | -0.319926  | 0.261207   |
| RPL7    | 1913.11  | 1858.88  | 2252.98  | -0.0414872 | 0.235914   |
| RPL7A   | 365.933  | 420.42   | 595.219  | 0.200249   | 0.70184    |
| RPL8    | 382.284  | 370.262  | 443.838  | -0.046097  | 0.215391   |
| RPL9    | 876.466  | 797.277  | 1098.37  | -0.136617  | 0.325597   |
| RPLP0   | 762.965  | 715.919  | 946.288  | -0.0918216 | 0.310662   |
| RPLP1   | 340.422  | 298.352  | 422.14   | -0.19031   | 0.310399   |
| RPPH1   | 2007.89  | 3122.44  | 2482.64  | 0.636993   | 0.306197   |
| RPS11   | 1315.04  | 1788.65  | 1634.58  | 0.443768   | 0.313819   |
| RPS12   | 940.351  | 926.555  | 1310.21  | -0.0213231 | 0.478531   |
| RPS13   | 434.953  | 407.392  | 540.723  | -0.094441  | 0.314032   |
| RPS14   | 374.219  | 434.455  | 472.083  | 0.215322   | 0.335156   |
| RPS16   | 219.705  | 256.411  | 346.698  | 0.222891   | 0.65811    |
| RPS18   | 1188.48  | 1324.95  | 1296.25  | 0.15682    | 0.125226   |
| RPS2    | 479.513  | 401.716  | 626.204  | -0.255394  | 0.385061   |
| RPS23   | 282.655  | 260.179  | 334.633  | -0.119538  | 0.243535   |
| RPS25   | 1337     | 1558.83  | 1612.44  | 0.221467   | 0.270247   |
| RPS26   | 208.619  | 219.041  | 268.971  | 0.0703283  | 0.366579   |
| RPS27   | 1187.29  | 1562.3   | 1428.18  | 0.395999   | 0.266509   |
| RPS27A  | 498.332  | 481.823  | 554.906  | -0.0486036 | 0.155136   |
| RPS28   | 220.971  | 200.283  | 284.746  | -0.141818  | 0.365813   |
| RPS3    | 564.55   | 555.385  | 731.343  | -0.023612  | 0.373448   |
| RPS3A   | 2402.85  | 2013.36  | 2918.14  | -0.255144  | 0.280303   |
| RPS6    | 1511.23  | 1357.56  | 1697.11  | -0.15471   | 0.167357   |
| RPS8    | 905.534  | 969.411  | 1080.62  | 0.0983395  | 0.255014   |
| RPS9    | 291.554  | 289.142  | 370.955  | -0.0119813 | 0.347482   |
| RPSA    | 573.648  | 466.378  | 749.372  | -0.298666  | 0.385517   |
| RXFP4   | 0.516217 | 0.406771 | 0.401283 | -0.343761  | -0.363359  |
| RYSR2   | 1.14282  | 1.23044  | 0.644232 | 0.106569   | -0.82695   |
| S100A6  | 2530.13  | 2964.96  | 3476.96  | 0.228799   | 0.458613   |
| SAT1    | 187.317  | 158.331  | 129.151  | -0.242537  | -0.536415  |
| SC4MOL  | 151.286  | 162.15   | 183.399  | 0.100053   | 0.277711   |
| SCARNA2 | 287.923  | 424.275  | 376.62   | 0.559318   | 0.387427   |
| SDR39U1 | 1.3951   | 1.41168  | 1.33502  | 0.0170463  | -0.0635075 |
| SGPP2   | 17.1347  | 9.2672   | 13.8947  | -0.886715  | -0.302387  |
| SIK1    | 21.4276  | 14.9659  | 15.9483  | -0.517787  | -0.426064  |

|          |          |          |           |            |              |
|----------|----------|----------|-----------|------------|--------------|
| SLC20A1  | 105.075  | 107.956  | 120.739   | 0.0390201  | 0.200467     |
| SLC38A2  | 226.945  | 327.895  | 217.989   | 0.530896   | -0.058085    |
| SLC39A8  | 353.997  | 67.9115  | 80.6476   | -2.38201   | -2.13403     |
| SLC7A2   | 189.197  | 36.5726  | 96.6886   | -2.37106   | -0.968475    |
| SMYD3    | 12.118   | 12.6642  | 12.66     | 0.0635968  | 0.0631195    |
| SND1     | 61.6893  | 49.662   | 51.8596   | -0.312878  | -0.250411    |
| SNHG1    | 13.671   | 11.4921  | 17.8275   | -0.250482  | 0.382983     |
| SNHG12   | 6.87664  | 9.34777  | 7.75039   | 0.442918   | 0.172564     |
| SNHG3    | 16.9126  | 9.29448  | 14.7788   | -0.863652  | -0.194566    |
| SNHG5    | 127.396  | 97.4435  | 154.949   | -0.386686  | 0.282473     |
| SNHG6    | 107.146  | 80.8248  | 152.795   | -0.406706  | 0.512021     |
| SNHG8    | 121.158  | 87.9303  | 153.995   | -0.462461  | 0.345994     |
| SNHG9    | 0        | 0        | 0.351868  | 0          | 1.79769e+308 |
| SNORA81  | 155.514  | 280.677  | 196.843   | 0.851864   | 0.340004     |
| SOD2     | 1250.81  | 313.763  | 267.283   | -1.99512   | -2.22642     |
| SQSTM1   | 88.2821  | 102.284  | 72.9589   | 0.21239    | -0.275036    |
| SRSF1    | 126.172  | 112.415  | 120.778   | -0.166563  | -0.0630408   |
| STC2     | 3.34886  | 2.49396  | 2.21813   | -0.425231  | -0.594329    |
| STOM     | 88.9191  | 85.4925  | 74.3118   | -0.0566943 | -0.258902    |
| TAF1D    | 53.0887  | 50.9507  | 53.2699   | -0.0593018 | 0.00491746   |
| TAF7     | 55.2595  | 79.7339  | 48.3046   | 0.52897    | -0.194062    |
| TAS1R3   | 0.443131 | 0.129654 | 0.0870254 | -1.77306   | -2.34822     |
| TCTEX1D4 | 0.481197 | 0.458547 | 0.56056   | -0.069558  | 0.220242     |
| TFAP2A   | 2.61063  | 3.38892  | 3.19229   | 0.376428   | 0.290195     |
| TGFBI    | 929.112  | 454.739  | 468.791   | -1.03082   | -0.986908    |
| TGFBR2   | 39.8503  | 46.3371  | 60.4619   | 0.217575   | 0.601435     |
| THAP7    | 2.46874  | 2.69645  | 2.96296   | 0.127288   | 0.263267     |
| THBS1    | 75.6662  | 98.7153  | 56.6091   | 0.383624   | -0.418616    |
| TIMM8B   | 24.3433  | 26.4728  | 22.4232   | 0.120989   | -0.118529    |
| TLCD1    | 6.34217  | 7.96435  | 11.5429   | 0.328579   | 0.863952     |
| TM4SF1   | 40.8468  | 31.0978  | 33.864    | -0.393411  | -0.270471    |
| TMTC1    | 53.1494  | 54.6855  | 38.4048   | 0.0411044  | -0.468768    |
| TNFAIP3  | 16.496   | 5.80279  | 4.26413   | -1.5073    | -1.95179     |
| TNFRSF6E | 3.93666  | 1.48485  | 4.7543    | -1.40666   | 0.27226      |
| TNIP1    | 49.7768  | 27.0131  | 30.6783   | -0.881818  | -0.698254    |
| TNS4     | 13.2809  | 12.9244  | 20.539    | -0.0392563 | 0.629012     |
| TPT1     | 1380.23  | 1567.83  | 1373.85   | 0.183859   | -0.0066855   |
| TRIB1    | 10.656   | 10.1584  | 7.32379   | -0.0689953 | -0.541005    |
| TSNAX-DI | 0.225957 | 0.44089  | 0.163735  | 0.964371   | -0.464682    |
| TSPAN31  | 11.0461  | 15.5303  | 13.5389   | 0.49155    | 0.293577     |
| TXNIP    | 108.415  | 50.1534  | 139.477   | -1.11214   | 0.363459     |
| UBC      | 421.245  | 503.952  | 395.51    | 0.258626   | -0.0909477   |
| UFSP1    | 0.646605 | 0.531745 | 0.254731  | -0.28215   | -1.34391     |
| UQCRQ    | 43.5293  | 55.4296  | 60.2933   | 0.348671   | 0.470012     |
| USH2A    | 0.240797 | 0.261713 | 0.232439  | 0.12017    | -0.0509619   |
| VNN3     | 10.3902  | 0.43952  | 0.829508  | -4.56315   | -3.64682     |
| VPS13B   | 18.737   | 18.6007  | 11.5149   | -0.0105347 | -0.702395    |
| WDR54    | 7.39556  | 10.2834  | 6.62988   | 0.475591   | -0.157677    |
| WEE1     | 20.7538  | 17.2503  | 23.5067   | -0.266749  | 0.179697     |
| WTAP     | 100.888  | 61.0525  | 53.0628   | -0.724631  | -0.92698     |
| XBP1     | 30.5147  | 26.0988  | 21.3505   | -0.225517  | -0.515234    |
| ZBTB16   | 11.2421  | 7.69597  | 10.7083   | -0.546742  | -0.0701891   |

|         |          |          |          |            |           |
|---------|----------|----------|----------|------------|-----------|
| ZC3H12A | 6.49995  | 1.43864  | 1.22006  | -2.17573   | -2.41348  |
| ZC3H12C | 29.3749  | 14.755   | 14.102   | -0.993384  | -1.05868  |
| ZFAND5  | 41.0524  | 25.9242  | 21.5328  | -0.663168  | -0.930933 |
| ZFP36   | 5.51219  | 3.88737  | 7.14152  | -0.50383   | 0.373606  |
| ZFP36L1 | 22.9549  | 15.1339  | 20.7703  | -0.601019  | -0.144284 |
| ZFP36L2 | 19.941   | 17.0603  | 25.7592  | -0.225094  | 0.369347  |
| ZNF513  | 0.784091 | 0.700116 | 0.937093 | -0.163428  | 0.257171  |
| ZNF692  | 2.06253  | 2.37412  | 2.68675  | 0.202978   | 0.381449  |
| ZNF830  | 12.453   | 12.2451  | 10.0329  | -0.0242881 | -0.311753 |
| ZNHIT2  | 1.98569  | 2.71441  | 2.89056  | 0.450998   | 0.541704  |
| RPL13A  | 247.071  | 219.229  | 339.805  | -0.1724910 | 0.4597790 |
