# Supplementary material
Source: PubMed Central journal article supplement (PMC4194113)
Supplement: embj0033-0890-sd15.pdf [file embj0033-0890-sd15.pdf]

| Illumina Probe ID | Gene Symbol | Basal level (log2 Fold change) |                     |                   | TNF stimulated (log2 Fold change) |                     |                   |
|-------------------|-------------|--------------------------------|---------------------|-------------------|-----------------------------------|---------------------|-------------------|
|                   |             | <i>BRCA1_vs_SCR</i>            | <i>PALB2_vs_SCR</i> | <i>p65_vs_SCR</i> | <i>BRCA1_vs_SCR</i>               | <i>PALB2_vs_SCR</i> | <i>p65_vs_SCR</i> |
| 6330725           | BCL3        | 0.03448275                     | 0.2426616           | -0.7346014        | 0.36137349                        | 0.65446169          | -1.3744053        |
| 5080021           | BIRC3       | -1.8458453                     | -1.3400412          | -2.7773684        | -0.599688                         | -0.6063261          | -3.1633257        |
| 4220246           | CCL20       | -1.7937716                     | -1.0394775          | -2.1305073        | -1.918674                         | -0.0914147          | -3.7564768        |
| 6620026           | CD83        | -0.5105278                     | -0.5305519          | -0.4371093        | 0.3133134                         | 0.48736378          | -1.7121081        |
| 5050162           | CD83        | -0.5009067                     | -0.4468885          | -0.4289427        | 0.25929928                        | 0.42959504          | -1.5069806        |
| 5490408           | CEBPD       | -0.8752867                     | -0.6375623          | -1.5290894        | -0.2491605                        | 0.27438492          | -2.2208161        |
| 3390187           | EFNA1       | -0.448795                      | -0.5139393          | -1.0514385        | 0.26963131                        | 0.53776153          | -2.5239023        |
| 3710397           | EFNA1       | -1.2067413                     | -0.5706523          | -1.4413595        | 0.27015004                        | 0.46156103          | -2.179311         |
| 870338            | EGR1        | -0.968137                      | -0.4489118          | -0.8493924        | -1.4531853                        | -1.0393237          | -1.0241104        |
| 130044            | ICAM1       | -0.9104779                     | -0.7979439          | -1.1646306        | -0.6703922                        | 0.27580862          | -2.3846811        |
| 1190367           | IER3        | -0.1597697                     | -0.1167535          | -0.3969818        | -0.1380859                        | 0.0839842           | -0.828536         |
| 1980309           | IL8         | -3.1994156                     | -2.3347159          | -3.4640001        | -3.3412036                        | -2.0401516          | -5.0783007        |
| 1570553           | IL8         | -1.4707818                     | -1.1585014          | -1.5177858        | -2.4250704                        | -1.7050917          | -2.7119844        |
| 6250064           | IRF1        | -1.8222768                     | -1.4264158          | -1.9832617        | 0.06894519                        | 0.43770827          | -2.817303         |
| 2190470           | KLF10       | -0.4186255                     | -0.862723           | -0.502421         | -0.0851876                        | -0.5239331          | -0.9187916        |
| 5690411           | MAFF        | -0.1884435                     | -0.1301833          | -0.1361303        | -0.1048981                        | 0.06290807          | -0.5748629        |
| 1430138           | MAFF        | -0.3114247                     | -0.488139           | -0.6190412        | -0.0207561                        | 0.03449069          | -0.9886889        |
| 1470215           | MAP3K8      | -0.7020001                     | -0.4256785          | -1.464091         | 0.37043434                        | 0.21089439          | -2.5198478        |
| 2690189           | MGC3020     | 0.06249899                     | -0.1836858          | -0.3342379        | 0.13969958                        | -0.0962825          | -0.8178555        |
| 670086            | MXD1        | -0.6075802                     | -0.7731125          | -0.864343         | -0.9137574                        | -0.8969476          | -1.1961171        |
| 630091            | NCOA7       | -0.6902839                     | -0.8695743          | -0.634811         | -0.9752421                        | -0.5767595          | -1.4343961        |
| 540139            | NFKBIE      | -1.0687099                     | -0.7673233          | -0.9477607        | -0.9347332                        | -0.047671           | -1.8116732        |
| 1110632           | NKX3-1      | -1.2007249                     | -0.6718954          | -0.9042872        | -0.7293774                        | 0.36475447          | -1.5855079        |
| 840356            | NUAK2       | -0.5868506                     | -0.46542            | -0.357526         | -0.7688055                        | -0.2262426          | -2.240528         |
| 380202            | NUAK2       | -0.5097364                     | -0.3712296          | -0.3991951        | -0.4897812                        | 0.01935083          | -1.6746663        |
| 240601            | PGLYRP2     | 0.51392207                     | 0.0319087           | -0.0356022        | 1.0481864                         | 0.92514715          | -0.7222707        |
| 5900725           | PHLDA1      | -0.4143817                     | -1.0309179          | -1.3126167        | -0.1461637                        | -0.7857839          | -1.7472178        |
| 3130301           | PIM1        | -0.9385904                     | -0.8541124          | 0.0081941         | -1.0265229                        | -0.8750699          | -0.8148305        |
| 5360670           | PLAU        | -1.0941784                     | -1.0775032          | -0.8953957        | -0.2261047                        | 0.01159615          | -2.1453173        |
| 1340600           | PPP1R15A    | -0.7489763                     | -1.3508051          | -1.4165137        | -0.6226054                        | -0.9488023          | -1.7372148        |
| 2710735           | RASD1       | -0.8694756                     | 0.3248713           | -1.2393771        | -0.7807269                        | 0.16751832          | -1.2940927        |
| 5810685           | THBS1       | 1.08592664                     | 0.5582976           | 0.7146983         | 0.73204806                        | 0.74229963          | 0.25077497        |
| 7570053           | RND1        | -0.7233889                     | -0.2741535          | -0.5993585        | -1.1220121                        | -0.0688087          | -1.8242991        |
| 730576            | SPRY4       | -0.474336                      | 0.0067715           | -0.0604206        | -0.3991998                        | 0.35940285          | -0.2352424        |
| 5570730           | TICAM1      | -0.2402676                     | -0.5025165          | -0.3496156        | 0.11022759                        | 0.25409864          | -0.8000465        |
| 2640301           | TNF         | -1.4142837                     | -0.8160353          | -2.100468         | -0.141986                         | 0.24767582          | -3.6319873        |
| 3360681           | TNFAIP3     | -1.6894139                     | -1.5591037          | -2.5469212        | -0.4957758                        | -0.2799804          | -3.77957          |
| 2370132           | TNFRSF11B   | 0.19326179                     | 0.0537133           | -0.2878441        | -0.2347911                        | 0.0241553           | -1.325415         |
