# Supplementary material
Source: PubMed Central journal article supplement (PMC4194113)
Supplement: embj0033-0890-sd16.pdf [file embj0033-0890-sd16.pdf]

| GENE IDENTIFIER |          | RA-induction at 24h ovet t=0h (log2FOLDCHANGE) |          |          |
|-----------------|----------|------------------------------------------------|----------|----------|
| PROBE ID        | SYMBOL   | CRTL sh                                        | PALB2 sh | BRCA1 sh |
| 2230008         | FGG      | 2.781                                          | 0.51     | 0.026    |
| 1980309         | IL8      | 1.862                                          | 1.073    | 0.518    |
| 4920040         | DEFB1    | 2.655                                          | 0.435    | 0.109    |
| 6770131         | OLFM4    | 3.122                                          | -0.024   | 0.136    |
| 5390220         | S100A9   | 0.539                                          | 0.777    | 0.564    |
| 7320561         | OAS2     | 0.948                                          | -0.09    | 0.252    |
| 2230204         | OAS2     | 1.101                                          | 0.318    | 0.087    |
| 3370349         | CFB      | 0.755                                          | 0.571    | 0.556    |
| 1510181         | PTGES    | 2.537                                          | 1.658    | 0.652    |
| 6420687         | PLUNC    | 2.357                                          | 0.639    | 0.156    |
| 2850551         | RCAN1    | 1.564                                          | -0.076   | 0.15     |
| 5700753         | CEACAM1  | 3.769                                          | 3.282    | 2.246    |
| 670386          | ID1      | 1.992                                          | 0.872    | 0.645    |
| 1690563         | SAA1     | 1.609                                          | 1.3      | 0.68     |
| 7210240         | FGB      | 2.419                                          | 0.795    | 0.069    |
| 6420605         | UBD      | 2.066                                          | 0.909    | 0.545    |
| 6370369         | CD14     | 2.934                                          | 2.193    | 1.45     |
| 2970154         | KLK6     | 0.502                                          | -0.064   | -0.304   |
| 4150014         | CEACAM1  | 2.892                                          | 2.313    | 1.301    |
| 990768          | OAS3     | 0.556                                          | 0.076    | -0.315   |
| 1570553         | IL8      | 1.258                                          | 0.444    | 0.2      |
| 5360156         | IFITM1   | 0.421                                          | 0.103    | -0.138   |
| 6590132         | IGFBP3   | 1.251                                          | 0.415    | 0.115    |
| 4250364         | HPGD     | 2.835                                          | 1.713    | 1.519    |
| 7320546         | LAMP3    | 0.697                                          | 0.511    | 0.085    |
| 4050291         | SAA2     | 1.614                                          | 1.207    | 0.422    |
| 3130301         | PIM1     | 1.17                                           | 0.63     | 0.457    |
| 1110373         | C15ORF48 | 1.296                                          | 1.46     | 1.494    |
| 2810451         | WDR72    | 1.606                                          | 0.713    | 0.28     |
| 1850674         | TRIM31   | 2.504                                          | 0.822    | 1.014    |
| 4610520         | GCNT3    | 1.787                                          | 0.759    | 0.173    |
| 1500280         | IFIT3    | 0.92                                           | 0.123    | 0.152    |
| 1090390         | OAS1     | 0.491                                          | -0.082   | -0.123   |
| 2850315         | ORM1     | 1.38                                           | 0.157    | 0.077    |
| 7040035         | OAS1     | 0.506                                          | 0.006    | -0.266   |
| 6900209         | ADAM19   | 1.554                                          | 1.121    | 0.459    |
| 1770333         | PDE5A    | 1.544                                          | 1.165    | 0.474    |
| 460204          | PLIN2    | 0.936                                          | 0.528    | 0.696    |
| 1510424         | S100P    | 1.544                                          | 0.875    | 1.587    |
| 1850564         | LBP      | 1.524                                          | 0.246    | 0.329    |
| 7000369         | CD14     | 2.005                                          | 1.027    | 0.497    |
| 4220246         | CCL20    | 0.627                                          | 0.81     | 0.404    |
| 2600747         | IFIT2    | 0.932                                          | 0.27     | 0.28     |
| 4390450         | SGK      | 1.224                                          | 0.271    | 0.083    |
| 1410209         | SGK1     | 1.131                                          | 0.199    | 0.015    |

|                   |       |        |        |
|-------------------|-------|--------|--------|
| 1940180 PSMB9     | 1.531 | 1.2    | 0.803  |
| 2070170 UBE2L6    | 1.043 | 0.887  | 0.835  |
| 610598 CHI3L2     | 0.548 | 0.151  | 0.103  |
| 2510605 FAM83A    | 0.984 | 0.712  | -0.194 |
| 540243 NPL        | 0.683 | 0.655  | 0.391  |
| 1260497 RFTN1     | 1.031 | 1.316  | 1.264  |
| 2190148 GBP1      | 0.787 | 0.406  | 0.255  |
| 7400707 C1S       | 1.107 | 0.641  | 0.775  |
| 6840035 GBP1      | 0.767 | 0.312  | -0.114 |
| 1240142 SAMD9     | 1.032 | 0.615  | 0.376  |
| 6060484 MARCKS    | 0.637 | 0.779  | 0.396  |
| 3870338 IFI44L    | 0.764 | 0.085  | 0.049  |
| 6840372 IGFBP3    | 1.063 | 0.263  | 0.269  |
| 2030324 SGK1      | 1.167 | 0.275  | 0.091  |
| 7610053 DDX60     | 0.564 | 0.149  | 0.181  |
| 2360632 CEACAM5   | 1.176 | 0.142  | 0.319  |
| 1400446 PLIN2     | 0.79  | 0.22   | 0.435  |
| 2260747 HRK       | 0.619 | 0.545  | 0.591  |
| 3180025 FGG       | 1.183 | 0.094  | 0.014  |
| 2000022 IRF9      | 0.403 | -0.035 | 0.004  |
| 3780092 TNFRSF21  | 0.559 | 0.403  | 0.477  |
| 620239 RCAN1      | 1.081 | 0.008  | -0.052 |
| 2570300 IFI44     | 0.856 | 0.396  | 0.037  |
| 580692 ID1        | 1.134 | 0.514  | 0.123  |
| 6400131 CYP24A1   | 1.344 | 0.087  | 0.268  |
| 6370187 RAI14     | 1.429 | 1.167  | 1.058  |
| 5080192 SERPINE2  | 0.613 | 0.179  | 0.299  |
| 3850059 LMO2      | 1.018 | 0.916  | 0.439  |
| 3190021 NTN4      | 0.846 | 0.712  | 0.619  |
| 3400097 MUC20     | 1.482 | 1.272  | 0.729  |
| 1510296 ASNS      | 0.406 | 0.328  | 0.506  |
| 240722 OAS2       | 0.464 | -0.162 | -0.168 |
| 2900220 BHLHB3    | 1.486 | 0.477  | -0.112 |
| 3440327 LOC653061 | 1.654 | 1.411  | 1.039  |
| 7650097 OASL      | 0.459 | -0.087 | 0.143  |
| 4590228 GLRX      | 1.23  | 0.67   | 0.246  |
| 7000575 FLJ23152  | 0.759 | 0.53   | 0.044  |
| 3940477 TAP2      | 1.128 | 0.958  | 1.01   |
| 5960181 ASNS      | 0.441 | 0.312  | 0.457  |
| 6110181 ABCC4     | 1.999 | 1.888  | 1.372  |
| 2450201 ABCC4     | 1.916 | 1.765  | 1.214  |
| 5490431 SAT1      | 0.679 | 0.541  | 0.944  |
| 1230047 CBS       | 0.675 | 0.786  | 0.589  |
| 1030431 ACSL1     | 0.773 | 0.528  | 0.516  |
| 2750128 SLC7A11   | 0.477 | 0.2    | 0.205  |
| 2060047 B4GALT5   | 0.787 | 0.44   | 0.152  |
| 6060440 FNDC3B    | 0.43  | 0.243  | -0.165 |

|                  |       |        |        |
|------------------|-------|--------|--------|
| 1780273 ALOX5    | 0.518 | 0.029  | -0.012 |
| 5900725 PHLDA1   | 1.959 | 1.145  | 0.537  |
| 3420373 SOD2     | 0.74  | 0.711  | 0.927  |
| 130044 ICAM1     | 0.831 | 0.792  | 0.432  |
| 7100468 ACE2     | 0.711 | 0.784  | 0.435  |
| 3850647 PTPN20   | 1.342 | 1.312  | 1.152  |
| 5560561 TNS3     | 0.782 | 0.476  | 0.413  |
| 520408 IFIT3     | 0.749 | 0.054  | -0.086 |
| 1980747 ALDH1L2  | 0.403 | 0.448  | 0.426  |
| 6250064 IRF1     | 1.462 | 1.847  | 1.465  |
| 3060682 BPGM     | 0.407 | -0.028 | -0.126 |
| 4730482 CDH5     | 4.146 | 3.748  | 3.237  |
| 2470358 IFNGR1   | 0.407 | 0.438  | 0.527  |
| 3390692 FAM83A   | 0.648 | 0.569  | -0.093 |
| 2450274 ANKRD43  | 2.694 | 2.133  | 1.839  |
| 5080021 BIRC3    | 0.827 | 0.869  | 1.006  |
| 2340082 IFRD1    | 0.544 | 0.071  | 0.412  |
| 2600424 SAA1     | 0.929 | 0.63   | 0.16   |
| 6770474 CYP2S1   | 0.413 | 0.385  | 0.046  |
| 3710068 WARS     | 0.613 | 0.079  | 0.36   |
| 5340129 AKR1C2   | 0.479 | 0.581  | 0.474  |
| 4860224 WARS     | 0.454 | 0.045  | 0.184  |
| 7210326 PSMB8    | 1.403 | 1.215  | 0.972  |
| 1990079 FBXO32   | 0.704 | 0.646  | 0.857  |
| 5090278 GPX2     | 3.2   | 2.438  | 2.76   |
| 5090132 EHF      | 0.601 | 0.443  | 0.439  |
| 7050255 FLJ35024 | 0.461 | 0.111  | -0.185 |
| 4670131 MYO10    | 1.057 | 0.672  | 0.287  |
| 4570441 IFIH1    | 0.496 | 0.167  | 0.563  |
| 5290630 FGB      | 0.997 | 0.558  | 0.239  |
| 6420215 STRA6    | 2.024 | 1.651  | 1.105  |
| 4290368 PSTPIP2  | 1.944 | 1.126  | 1.281  |
| 3890326 SOD2     | 0.701 | 0.842  | 1.098  |
| 2900747 C10ORF10 | 0.846 | 0.285  | 0.117  |
| 1940524 STS-1    | 0.976 | 0.539  | 0.469  |
| 3120598 AKR1C4   | 0.776 | 0.706  | 0.677  |
| 5810424 C1RL     | 0.75  | 0.125  | 0.072  |
| 1980524 GBP4     | 0.921 | 0.108  | 0.234  |
| 5700735 PARP9    | 0.522 | 0.32   | 0.622  |
| 450020 ORM2      | 0.674 | 0.267  | -0.16  |
| 6940364 CP       | 3.777 | 2.642  | 2.842  |
| 3930750 IRAK2    | 0.824 | 0.65   | 0.908  |
| 6370364 MGC87042 | 1.178 | 0.745  | 0.669  |
| 3420632 PSMB8    | 1.231 | 1.099  | 1.029  |
| 3180026 PSMB8    | 1.24  | 0.454  | 0.335  |
| 1430598 FBXO32   | 0.69  | 0.385  | 0.474  |
| 5490408 CEBPD    | 0.84  | 0.323  | 0.54   |

|                   |       |        |        |
|-------------------|-------|--------|--------|
| 4070719 C15ORF48  | 0.716 | 0.403  | 0.277  |
| 3400019 RGS2      | 0.721 | 0.237  | 0.182  |
| 6220543 HIF1A     | 0.477 | 0.339  | 0.368  |
| 160242 C13ORF15   | 2.108 | 1.181  | 1.887  |
| 770538 LYSMD2     | 0.701 | 0.264  | 0.301  |
| 2750367 PMAIP1    | 0.74  | 0.637  | 0.256  |
| 4670414 TMEM140   | 1.103 | 0.813  | 0.746  |
| 6560066 MTHFS     | 0.496 | 0.274  | 0.058  |
| 4900010 HIF1A     | 0.481 | 0.378  | 0.397  |
| 3940435 EMP1      | 0.72  | -0.2   | 0.517  |
| 2060315 C14ORF73  | 0.684 | 0.625  | 0.49   |
| 6760286 HS.72010  | 0.462 | 0.216  | 0.189  |
| 6650327 CLGN      | 0.651 | 0.344  | 0.153  |
| 6550056 IFNAR2    | 0.496 | 0.405  | 0.072  |
| 630167 SDCBP      | 0.575 | 0.661  | 0.426  |
| 3060523 NAMPT     | 0.447 | 0.163  | 0.215  |
| 5260474 C1R       | 0.786 | 0.234  | 0.433  |
| 2340072 PARP12    | 0.727 | 0.548  | 0.592  |
| 3140707 PARP9     | 0.612 | 0.521  | 0.551  |
| 5670367 PHLDA1    | 1.374 | 0.984  | 0.534  |
| 3890609 PLSR1     | 0.409 | 0.376  | 0.517  |
| 50255 SNAI2       | 0.515 | -0.063 | 0.384  |
| 7400768 PTPRH     | 0.871 | 0.503  | 0.221  |
| 1580435 TGM2      | 2.801 | 3.097  | 2.833  |
| 6860082 SLC16A5   | 0.493 | 0.156  | -0.023 |
| 5670594 NMB       | 0.434 | 0.283  | 0.202  |
| 1400601 C20ORF100 | 0.77  | 0.163  | 0.09   |
| 2030577 TIMP3     | 0.748 | 0.304  | 0.526  |
| 5490470 MX2       | 0.51  | 0.114  | -0.066 |
| 5910440 STEAP1    | 0.886 | 0.533  | 0.113  |
| 2690324 ITPRIP    | 0.919 | 1.093  | 1.144  |
| 7160553 HOXA4     | 1.532 | 1.209  | 0.937  |
| 7330639 NR5A2     | 3.341 | 2.33   | 2.451  |
| 1500168 RCN1      | 0.508 | 0.458  | 0.795  |
| 4570524 ICK       | 0.599 | 0.463  | 0.376  |
| 6040020 HS.164221 | 0.72  | 0.522  | 0.259  |
| 520059 LAMP3      | 0.401 | 0.184  | -0.149 |
| 4120408 NR5A2     | 3.32  | 2.31   | 2.387  |
| 4150692 PARP14    | 0.969 | 0.694  | 0.64   |
| 1440196 MAG       | 1.302 | 1.506  | 0.513  |
| 7210154 BIRC3     | 0.759 | 0.459  | 0.389  |
| 1240725 SLFN5     | 0.48  | 0.213  | 0.274  |
| 7610440 XAF1      | 0.403 | -0.015 | 0.014  |
| 6040324 SDCBP     | 0.542 | 0.67   | 0.517  |
| 430603 NTN4       | 0.455 | 0.327  | 0.23   |
| 5860154 SHROOM1   | 4.236 | 3.9    | 4.109  |
| 2070059 PARP10    | 0.493 | 0.247  | 0.257  |

|                   |       |        |        |
|-------------------|-------|--------|--------|
| 3360553 RP5-1022P | 0.699 | 0.387  | 0.142  |
| 4890327 IFIT5     | 0.453 | 0.321  | 0.374  |
| 2680722 HIF1A     | 0.636 | 0.477  | 0.661  |
| 7050682 SEMA6A    | 0.485 | 0.398  | -0.02  |
| 940487 FUT3       | 0.636 | 0.301  | 0.185  |
| 1190274 ASZ1      | 0.414 | 0.012  | -0.05  |
| 7320682 PCK2      | 0.415 | 0.287  | 0.174  |
| 1090497 CREG1     | 0.606 | -0.194 | -0.171 |
| 4860494 C3        | 0.461 | 0.018  | -0.142 |
| 3190148 DDIT4     | 0.419 | -0.201 | 0.347  |
| 3060255 BIRC3     | 0.618 | 0.462  | 0.423  |
| 7610338 CDH3      | 0.69  | 0.092  | -0.046 |
| 2370670 C1R       | 0.446 | 0.068  | -0.16  |
| 4250056 TRIM14    | 0.578 | 0.328  | 0.342  |
| 60079 DNAJB1      | 0.458 | 0.191  | 0.087  |
| 2570240 SULF1     | 0.707 | 0.519  | 0.052  |
| 2760164 DNAJB9    | 0.544 | 0.227  | 0.251  |
| 2940446 TGM2      | 1.492 | 1.233  | 1.249  |
| 4730541 SLC44A1   | 0.648 | 0.14   | -0.096 |
| 290397 LLGL2      | 0.851 | 0.479  | 0.412  |
| 5960747 TRIM22    | 0.609 | 0.355  | 0.151  |
| 2970347 ITPRIP    | 0.908 | 0.959  | 1.011  |
| 5340519 HS.445239 | 1.026 | 0.388  | 0.317  |
| 4120079 KPNA7     | 0.611 | 0.317  | 0.422  |
| 3060059 TAF1A     | 0.419 | 0.085  | 0.361  |
| 1440706 TRIM31    | 0.703 | -0.212 | 0.011  |
| 2710064 LOC387763 | 0.665 | 0.115  | 0.46   |
| 670475 C4ORF19    | 0.809 | 0.668  | 0.694  |
| 2900593 VEGFA     | 0.496 | 0.293  | 0.163  |
| 130338 SAA1       | 0.509 | 0.178  | 0.097  |
| 6280224 CYP26B1   | 6.076 | 4.938  | 4.773  |
| 540091 STEAP4     | 0.6   | 0.324  | 0.229  |
| 2510220 IFI35     | 0.515 | 0.332  | 0.204  |
| 430079 LIFR       | 0.635 | -0.151 | 0.157  |
| 6370202 RBBP4     | 0.442 | 0.221  | 0.172  |
| 6280059 PPM1E     | 0.474 | 0.851  | 1.149  |
| 1300327 C1S       | 0.545 | 0.214  | 0.186  |
| 5560195 LOC653879 | 0.54  | -0.098 | 0.038  |
| 6060367 AHR       | 0.719 | 0.483  | 0.422  |
| 2120224 ANKRD13A  | 0.637 | 0.422  | 0.648  |
| 5960731 SOD2      | 0.673 | 0.301  | 0.28   |
| 3520255 SLC16A7   | 0.417 | 0.089  | 0.187  |
| 6420465 GABARAPL  | 0.832 | 0.523  | 0.44   |
| 2510358 TSPAN1    | 3.214 | 1.871  | 3.122  |
| 1430682 HS.88156  | 0.791 | 0.407  | 0.223  |
| 4050735 XPOT      | 0.514 | 0.22   | 0.4    |
| 6220288 PRDM1     | 0.517 | -0.002 | 0.042  |

|                   |       |       |        |
|-------------------|-------|-------|--------|
| 380102 TMEM51     | 1.283 | 1.11  | 0.993  |
| 3180315 ZNF319    | 0.517 | 0.241 | 0.178  |
| 4290605 SLC44A1   | 0.47  | 0.163 | 0.096  |
| 5220204 C19ORF66  | 0.631 | 0.543 | 0.455  |
| 6450630 PDE5A     | 0.55  | 0.128 | 0.2    |
| 7550181 IFNAR1    | 0.945 | 0.702 | 0.238  |
| 5310754 VNN1      | 0.58  | 0.073 | 0.018  |
| 1500669 MYO1B     | 0.533 | 0.396 | 0.439  |
| 2750767 LOC100129 | 0.438 | 0.27  | 0.472  |
| 4810520 TRIB1     | 0.414 | 0.025 | -0.152 |
| 3440377 PCGF5     | 0.409 | 0.013 | 0.007  |
| 160333 C6ORF192   | 0.614 | 0.356 | 0.582  |
| 1690056 LYZ       | 0.653 | 0.343 | 0.199  |
| 1470215 MAP3K8    | 0.563 | 0.501 | 0.359  |
| 2340477 TTC39B    | 0.478 | 0.094 | -0.58  |
