# Supplementary material
Source: PubMed Central journal article supplement (PMC4194113)
Supplement: embj0033-0890-sd17.pdf [file embj0033-0890-sd17.pdf]

© 2000-2013 Ingenuity Systems, Inc. All rights reserved.

| Upstream Regulator       | Log Ratio | Molecule Type           | Predicted Activation State | Activation z-score | p-value of overlap |
|--------------------------|-----------|-------------------------|----------------------------|--------------------|--------------------|
| lipopolysaccharide       |           | chemical drug           | Inhibited                  | -7.648             | 9.80E-07           |
| TNF                      | -0.107    | cytokine                | Inhibited                  | -6.677             | 3.69E-15           |
| HGF                      | 0.260     | growth factor           | Inhibited                  | -6.507             | 1.70E-09           |
| Vegf                     |           | group                   | Inhibited                  | -6.474             | 1.15E-10           |
| TGFB1                    | -0.439    | growth factor           | Inhibited                  | -5.786             | 2.22E-14           |
| NFKB (complex)           |           | complex                 | Inhibited                  | -5.469             | 1.93E-04           |
| IL1B                     | 0.159     | cytokine                | Inhibited                  | -5.382             | 1.83E-09           |
| poly rI:rC-RNA           |           | chemical                | Inhibited                  | -5.077             | 4.27E-08           |
| hydrogen peroxide        |           | chemical                | Inhibited                  | -5.059             | 3.48E-07           |
| phorbol myristate aceta  |           | chemical                | Inhibited                  | -5.038             | 9.70E-07           |
| F2                       | 0.111     | peptidase               | Inhibited                  | -5.036             | 1.95E-05           |
| IFNG                     | 0.230     | cytokine                | Inhibited                  | -4.710             | 3.24E-13           |
| SP1                      | 0.207     | transcription regulator | Inhibited                  | -4.685             | 6.57E-05           |
| IL1A                     | 0.373     | cytokine                | Inhibited                  | -4.656             | 4.24E-06           |
| decitabine               |           | chemical drug           | Inhibited                  | -4.595             | 4.84E-04           |
| EGF                      | 0.151     | growth factor           | Inhibited                  | -4.592             | 5.06E-05           |
| tretinoin                |           | chemical - endogenous   | Inhibited                  | -4.569             | 3.48E-09           |
| CTNNB1                   | -0.079    | transcription regulator | Inhibited                  | -4.568             | 4.80E-06           |
| trichostatin A           |           | chemical drug           | Inhibited                  | -4.456             | 4.49E-03           |
| PDGF BB                  |           | complex                 | Inhibited                  | -4.341             | 2.24E-07           |
| RAF1                     | -0.337    | kinase                  | Inhibited                  | -4.339             | 3.57E-08           |
| Salmonella enterica ser  |           | chemical toxicant       | Inhibited                  | -4.330             | 1.40E-03           |
| doxorubicin              |           | chemical drug           | Inhibited                  | -4.293             | 1.79E-04           |
| IL6                      | 0.277     | cytokine                | Inhibited                  | -4.269             | 5.96E-06           |
| ARNT2                    | -0.673    | transcription regulator | Inhibited                  | -4.243             | 2.12E-02           |
| SIM1                     | 0.034     | transcription regulator | Inhibited                  | -4.243             | 2.52E-02           |
| TNFSF11                  | -0.056    | cytokine                | Inhibited                  | -4.194             | 1.40E-06           |
| MYD88                    | 0.072     | other                   | Inhibited                  | -4.129             | 8.32E-03           |
| Cg                       |           | complex                 | Inhibited                  | -4.103             | 1.14E-03           |
| prostaglandin E2         |           | chemical - endogenous   | Inhibited                  | -4.063             | 2.28E-02           |
| IKBKG                    | -0.059    | kinase                  | Inhibited                  | -3.965             | 8.44E-04           |
| CEBPB                    | -0.199    | transcription regulator | Inhibited                  | -3.947             | 2.51E-06           |
| CD40LG                   | -0.114    | cytokine                | Inhibited                  | -3.940             | 8.36E-06           |
| ionomycin                |           | chemical reagent        | Inhibited                  | -3.928             | 2.50E-04           |
| IL1                      |           | group                   | Inhibited                  | -3.777             | 1.65E-04           |
| TP73                     | 0.067     | transcription regulator | Inhibited                  | -3.774             | 5.11E-03           |
| HIF1A                    | 0.092     | transcription regulator | Inhibited                  | -3.772             | 2.55E-02           |
| STAT3                    | -0.462    | transcription regulator | Inhibited                  | -3.768             | 1.69E-06           |
| CD24                     | 0.311     | other                   | Inhibited                  | -3.742             | 4.84E-06           |
| IKBKB                    | -0.629    | kinase                  | Inhibited                  | -3.731             | 1.61E-04           |
| E. coli B5 lipopolysacch |           | chemical - endogenous   | Inhibited                  | -3.696             | 8.69E-05           |
| MITF                     | -0.333    | transcription regulator | Inhibited                  | -3.676             | 2.48E-02           |
| VEGFA                    | -0.411    | growth factor           | Inhibited                  | -3.654             | 4.46E-03           |
| CHUK                     | -0.361    | kinase                  | Inhibited                  | -3.641             | 8.85E-03           |
| Interferon alpha         |           | group                   | Inhibited                  | -3.631             | 3.04E-04           |
| bleomycin                |           | chemical drug           | Inhibited                  | -3.613             | 6.94E-04           |
| TICAM1                   | -0.193    | other                   | Inhibited                  | -3.564             | 1.70E-02           |
| forskolin                |           | chemical toxicant       | Inhibited                  | -3.510             | 1.93E-09           |

|                         |        |                               |           |        |          |
|-------------------------|--------|-------------------------------|-----------|--------|----------|
| PGR                     | -0.005 | ligand-dependent nuclear      | Inhibited | -3.493 | 1.06E-03 |
| CEBPA                   | 0.036  | transcription regulator       | Inhibited | -3.492 | 5.67E-06 |
| FN1                     | 0.806  | enzyme                        | Inhibited | -3.473 | 7.07E-04 |
| RELA                    | -0.416 | transcription regulator       | Inhibited | -3.455 | 3.21E-04 |
| Pkc(s)                  |        | group                         | Inhibited | -3.440 | 1.37E-04 |
| 1-alpha, 25-dihydroxy v |        | chemical drug                 | Inhibited | -3.435 | 2.22E-05 |
| tert-butyl-hydroquinone |        | chemical reagent              | Inhibited | -3.424 | 5.26E-04 |
| bucladesine             |        | chemical toxicant             | Inhibited | -3.416 | 9.20E-04 |
| salmonella minnesota F  |        | chemical - endogenous         | Inhibited | -3.403 | 3.15E-03 |
| dexamethasone           |        | chemical drug                 | Inhibited | -3.389 | 1.00E-16 |
| aldosterone             |        | chemical - endogenous         | Inhibited | -3.373 | 2.64E-03 |
| TREM1                   | -0.506 | transmembrane receptor        | Inhibited | -3.369 | 5.57E-07 |
| ERK1/2                  |        | group                         | Inhibited | -3.352 | 1.14E-05 |
| GLI1                    | 0.210  | transcription regulator       | Inhibited | -3.345 | 3.07E-02 |
| P38 MAPK                |        | group                         | Inhibited | -3.341 | 2.51E-02 |
| Ca2+                    |        | chemical - endogenous         | Inhibited | -3.328 | 2.95E-04 |
| CNR1                    | 0.069  | G-protein coupled receptor    | Inhibited | -3.268 | 5.27E-03 |
| MAP2K1                  | -0.191 | kinase                        | Inhibited | -3.265 | 1.59E-06 |
| TP53                    | -0.554 | transcription regulator       | Inhibited | -3.250 | 4.48E-10 |
| benzyloxycarbonyl-Leu-  |        | chemical - protease inhibitor | Inhibited | -3.248 | 6.19E-05 |
| ADCYAP1                 | 0.126  | other                         | Inhibited | -3.244 | 3.57E-02 |
| dinoprost               |        | chemical - endogenous         | Inhibited | -3.232 | 4.10E-04 |
| PRL                     | 0.124  | cytokine                      | Inhibited | -3.229 | 1.20E-04 |
| thapsigargin            |        | chemical toxicant             | Inhibited | -3.225 | 4.59E-04 |
| TLR3                    | 0.170  | transmembrane receptor        | Inhibited | -3.220 | 1.52E-02 |
| OSM                     | 0.078  | cytokine                      | Inhibited | -3.164 | 2.98E-15 |
| IL4                     | 0.165  | cytokine                      | Inhibited | -3.157 | 4.49E-04 |
| LDL                     |        | complex                       | Inhibited | -3.155 | 1.56E-04 |
| PTH                     | 0.148  | other                         | Inhibited | -3.153 | 1.91E-04 |
| tributyrin              |        | chemical drug                 | Inhibited | -3.132 | 1.27E-03 |
| FOXO1                   | -0.037 | transcription regulator       | Inhibited | -3.118 | 2.42E-02 |
| ESR2                    | 0.264  | ligand-dependent nuclear      | Inhibited | -3.105 | 2.12E-02 |
| D-galactosamine         |        | chemical - endogenous         | Inhibited | -3.101 | 2.23E-05 |
| MAPK14                  | -0.374 | kinase                        | Inhibited | -3.086 | 9.51E-04 |
| ethanol                 |        | chemical - endogenous         | Inhibited | -3.083 | 9.09E-03 |
| mycophenolic acid       |        | chemical drug                 | Inhibited | -3.053 | 2.05E-04 |
| gentamicin              |        | chemical drug                 | Inhibited | -3.030 | 4.27E-02 |
| lomustine               |        | chemical drug                 | Inhibited | -3.000 | 5.09E-03 |
| allopurinol             |        | chemical drug                 | Inhibited | -3.000 | 2.29E-02 |
| ANXA7                   | -0.286 | ion channel                   | Inhibited | -2.985 | 9.25E-03 |
| IL17A                   | 0.181  | cytokine                      | Inhibited | -2.976 | 9.74E-03 |
| triamterene             |        | chemical drug                 | Inhibited | -2.970 | 6.94E-03 |
| thioacetamide           |        | chemical toxicant             | Inhibited | -2.950 | 3.34E-03 |
| 8-bromo-cAMP            |        | chemical reagent              | Inhibited | -2.939 | 9.10E-04 |
| dihydrotestosterone     |        | chemical - endogenous         | Inhibited | -2.931 | 1.17E-06 |
| AGT                     | 0.087  | growth factor                 | Inhibited | -2.917 | 3.63E-08 |
| ERG                     | 0.332  | transcription regulator       | Inhibited | -2.885 | 3.15E-03 |
| rosiglitazone           |        | chemical drug                 | Inhibited | -2.866 | 2.72E-02 |
| trovafloxacin           |        | chemical drug                 | Inhibited | -2.840 | 1.66E-06 |
| gentamicin C            |        | chemical drug                 | Inhibited | -2.828 | 1.60E-02 |
| Retnlb                  |        | other                         | Inhibited | -2.828 | 4.07E-02 |
| ERK                     |        | group                         | Inhibited | -2.824 | 2.88E-04 |

|                           |        |                          |           |        |          |
|---------------------------|--------|--------------------------|-----------|--------|----------|
| STAT1                     | 0.659  | transcription regulator  | Inhibited | -2.811 | 1.74E-02 |
| FOXL2                     | 0.150  | transcription regulator  | Inhibited | -2.810 | 6.48E-03 |
| resveratrol               |        | chemical drug            | Inhibited | -2.803 | 4.43E-02 |
| Pka                       |        | complex                  | Inhibited | -2.789 | 3.53E-02 |
| TSH                       |        | complex                  | Inhibited | -2.789 | 5.13E-03 |
| Pdgf (complex)            |        | complex                  | Inhibited | -2.787 | 2.63E-03 |
| N-Ac-Leu-Leu-norleucir    |        | chemical - protease inhi | Inhibited | -2.784 | 4.65E-02 |
| E. coli lipopolysaccharic |        | chemical - endogenous    | Inhibited | -2.770 | 2.08E-02 |
| deferroxamine             |        | chemical drug            | Inhibited | -2.764 | 7.63E-03 |
| paclitaxel                |        | chemical drug            | Inhibited | -2.761 | 4.00E-04 |
| ERBB2                     | -0.499 | kinase                   | Inhibited | -2.735 | 2.65E-12 |
| EGR1                      | -0.316 | transcription regulator  | Inhibited | -2.732 | 5.90E-04 |
| HIST1H1T                  | 0.059  | other                    | Inhibited | -2.714 | 4.93E-03 |
| HIST1H1A                  | 0.097  | other                    | Inhibited | -2.714 | 5.87E-03 |
| APP                       | -0.489 | other                    | Inhibited | -2.711 | 5.05E-10 |
| amphetamine               |        | chemical drug            | Inhibited | -2.708 | 2.33E-04 |
| IGF1                      | 0.475  | growth factor            | Inhibited | -2.705 | 5.21E-03 |
| FGF2                      | -0.784 | growth factor            | Inhibited | -2.704 | 1.92E-04 |
| beta-estradiol            |        | chemical - endogenous    | Inhibited | -2.647 | 7.70E-16 |
| EPAS1                     | -0.418 | transcription regulator  | Inhibited | -2.645 | 1.30E-05 |
| nitric oxide              |        | chemical - endogenous    | Inhibited | -2.640 | 9.51E-04 |
| glucocorticoid            |        | chemical drug            | Inhibited | -2.629 | 3.75E-03 |
| WNT1                      | 0.056  | cytokine                 | Inhibited | -2.621 | 1.88E-02 |
| PRKCA                     | 0.292  | kinase                   | Inhibited | -2.616 | 1.15E-04 |
| Tgf beta                  |        | group                    | Inhibited | -2.613 | 4.46E-03 |
| FGF10                     |        | growth factor            | Inhibited | -2.611 | 5.22E-04 |
| L-glutamic acid           |        | chemical - endogenous    | Inhibited | -2.608 | 1.84E-02 |
| carbonyl cyanide m-chlc   |        | chemical toxicant        | Inhibited | -2.607 | 1.75E-02 |
| LIF                       | -0.371 | cytokine                 | Inhibited | -2.599 | 6.40E-02 |
| CREB1                     | -0.512 | transcription regulator  | Inhibited | -2.597 | 3.44E-02 |
| ETS1                      | 0.071  | transcription regulator  | Inhibited | -2.596 | 1.30E-04 |
| GATA1                     | -0.117 | transcription regulator  | Inhibited | -2.592 | 4.52E-02 |
| crocidolite asbestos      |        | chemical toxicant        | Inhibited | -2.589 | 4.57E-04 |
| CCL5                      | 0.168  | cytokine                 | Inhibited | -2.569 | 2.25E-02 |
| PPARG                     | -0.176 | ligand-dependent nucle   | Inhibited | -2.568 | 3.36E-02 |
| cigarette smoke           |        | chemical toxicant        | Inhibited | -2.565 | 3.13E-03 |
| FOXO3                     | -0.787 | transcription regulator  | Inhibited | -2.559 | 2.06E-03 |
| NFKBIA                    | -0.205 | transcription regulator  | Inhibited | -2.538 | 9.35E-08 |
| lfn                       |        | group                    | Inhibited | -2.530 | 1.59E-02 |
| progesterone              |        | chemical - endogenous    | Inhibited | -2.478 | 6.04E-02 |
| BAX                       | 0.351  | transporter              | Inhibited | -2.449 | 1.59E-02 |
| 9-cis-retinoic acid       |        | chemical drug            | Inhibited | -2.449 | 2.48E-02 |
| MAPK8                     | 0.393  | kinase                   | Inhibited | -2.447 | 1.62E-02 |
| FSH                       |        | complex                  | Inhibited | -2.433 | 4.27E-10 |
| MAP2K1/2                  |        | group                    | Inhibited | -2.433 | 4.43E-02 |
| VitaminD3-VDR-RXR         |        | complex                  | Inhibited | -2.423 | 3.10E-02 |
| carbon tetrachloride      |        | chemical toxicant        | Inhibited | -2.419 | 7.59E-03 |
| N-acetylsphingosine       |        | chemical reagent         | Inhibited | -2.415 | 2.30E-02 |
| PPRC1                     | -0.147 | transcription regulator  | Inhibited | -2.414 | 2.82E-02 |
| NRG1                      | 0.440  | growth factor            | Inhibited | -2.404 | 3.99E-02 |
| SGK1                      | -0.529 | kinase                   | Inhibited | -2.400 | 4.81E-02 |
| FGFR1                     | 0.273  | kinase                   | Inhibited | -2.387 | 7.65E-03 |

|                         |        |                         |           |        |          |
|-------------------------|--------|-------------------------|-----------|--------|----------|
| FOXC2                   | 0.302  | other                   | Inhibited | -2.383 | 2.64E-03 |
| vancomycin              |        | chemical drug           | Inhibited | -2.375 | 3.39E-04 |
| delta-9-tetrahydrocanna |        | chemical drug           | Inhibited | -2.363 | 4.54E-03 |
| RET                     | -0.131 | kinase                  | Inhibited | -2.359 | 1.47E-05 |
| 5-N-ethylcarboxamido ε  |        | chemical reagent        | Inhibited | -2.358 | 4.86E-03 |
| BMP2                    | 0.524  | growth factor           | Inhibited | -2.341 | 3.83E-02 |
| daidzein                |        | chemical drug           | Inhibited | -2.333 | 1.69E-02 |
| peptidoglycan           |        | chemical - endogenous   | Inhibited | -2.304 | 2.27E-02 |
| JAK2                    | -0.517 | kinase                  | Inhibited | -2.301 | 7.45E-04 |
| E. coli serotype 0127B8 |        | chemical - endogenous   | Inhibited | -2.267 | 1.22E-03 |
| CEBPD                   | -0.513 | other                   | Inhibited | -2.257 | 6.06E-04 |
| STAT6                   | -0.624 | transcription regulator | Inhibited | -2.238 | 1.69E-02 |
| SELPLG                  | 0.209  | other                   | Inhibited | -2.236 | 2.36E-02 |
| TFEB                    | -0.067 | transcription regulator | Inhibited | -2.236 | 1.37E-02 |
| TNFSF10                 | -0.522 | cytokine                | Inhibited | -2.222 | 1.48E-03 |
| CSF1                    | 0.126  | cytokine                | Inhibited | -2.219 | 4.12E-03 |
| MAP3K14                 | -0.130 | kinase                  | Inhibited | -2.219 | 2.24E-03 |
| lithocholic acid        |        | chemical - endogenous   | Inhibited | -2.219 | 7.02E-03 |
| Ni2+                    |        | chemical reagent        | Inhibited | -2.219 | 7.02E-03 |
| cholecalciferol         |        | chemical - endogenous   | Inhibited | -2.216 | 1.65E-03 |
| rifampin                |        | chemical drug           | Inhibited | -2.216 | 1.57E-03 |
| CDX2                    | 0.508  | transcription regulator | Inhibited | -2.211 | 1.44E-03 |
| nitroprusside           |        | chemical drug           | Inhibited | -2.200 | 7.11E-02 |
| quinolinic acid         |        | chemical - endogenous   | Inhibited | -2.191 | 7.70E-02 |
| Am 580                  |        | chemical toxicant       | Inhibited | -2.190 | 2.36E-02 |
| bisphenol A             |        | chemical - endogenous   | Inhibited | -2.184 | 2.05E-03 |
| VDR                     | -0.608 | ligand-dependent nuclea | Inhibited | -2.179 | 1.06E-01 |
| 6-hydroxydopamine       |        | chemical toxicant       | Inhibited | -2.156 | 7.53E-04 |
| SQSTM1                  | -0.292 | transcription regulator | Inhibited | -2.156 | 7.53E-03 |
| MET                     | -0.949 | kinase                  | Inhibited | -2.145 | 4.10E-04 |
| maneb                   |        | chemical toxicant       | Inhibited | -2.121 | 1.46E-02 |
| arsenic trioxide        |        | chemical drug           | Inhibited | -2.085 | 6.71E-02 |
| olanzapine              |        | chemical drug           | Inhibited | -2.064 | 4.70E-02 |
| 9,10-dimethyl-1,2-benz  |        | chemical toxicant       | Inhibited | -2.053 | 4.36E-05 |
| GNA12                   | 0.112  | enzyme                  | Inhibited | -2.025 | 1.46E-05 |
| Ras                     |        | group                   | Inhibited | -2.022 | 5.46E-03 |
| EDN3                    | 0.217  | other                   | Inhibited | -2.000 | 2.15E-02 |
| SEMA7A                  | 0.142  | transmembrane recepto   | Inhibited | -2.000 | 2.52E-02 |
| eflornithine            |        | chemical drug           | Inhibited | -2.000 | 1.34E-01 |
| PLAU                    | 0.511  | peptidase               |           | -1.996 | 2.67E-02 |
| butylated hydroxyanisol |        | chemical toxicant       |           | -1.995 | 3.37E-02 |
| SRC                     | -0.511 | kinase                  |           | -1.992 | 1.42E-03 |
| PLAUR                   | -0.720 | transmembrane recepto   |           | -1.990 | 2.67E-02 |
| ozone                   |        | chemical toxicant       |           | -1.990 | 4.38E-02 |
| nocodazole              |        | chemical reagent        |           | -1.988 | 2.63E-01 |
| R5020                   |        | chemical reagent        |           | -1.982 | 1.27E-03 |
| AREG/AREGB              | 0.240  | growth factor           |           | -1.982 | 2.52E-02 |
| MALP-2s                 |        | chemical reagent        |           | -1.982 | 3.37E-02 |
| STAT                    |        | group                   |           | -1.982 | 3.74E-02 |
| chrysotile asbestos     |        | chemical toxicant       |           | -1.982 | 4.38E-02 |
| IRF6                    | 0.192  | transcription regulator |           | -1.982 | 4.93E-02 |
| TRPV4                   | -0.086 | ion channel             |           | -1.980 | 2.93E-02 |

|                            |        |                          |        |          |
|----------------------------|--------|--------------------------|--------|----------|
| JUN                        | -0.635 | transcription regulator  | -1.977 | 6.24E-05 |
| PTGS2                      | 0.054  | enzyme                   | -1.977 | 1.70E-02 |
| NTF3                       | -0.094 | growth factor            | -1.977 | 2.52E-02 |
| BCL2                       | -0.296 | transporter              | -1.976 | 3.52E-02 |
| cis-urocanic acid          |        | chemical drug            | -1.969 | 4.74E-03 |
| IL17R                      |        | complex                  | -1.969 | 1.24E-02 |
| PI3K (complex)             |        | complex                  | -1.965 | 2.48E-02 |
| prostaglandin A1           |        | chemical - endogenous    | -1.964 | 2.52E-02 |
| lipoarabinomannan          |        | chemical - endogenous    | -1.964 | 2.93E-02 |
| metribolone                |        | chemical reagent         | -1.960 | 4.82E-03 |
| KLF4                       | -0.266 | transcription regulator  | -1.960 | 2.01E-01 |
| TGFB2                      | -0.548 | kinase                   | -1.954 | 2.09E-03 |
| ESR1                       | -1.265 | ligand-dependent nuclear | -1.954 | 1.18E-05 |
| methylprednisolone         |        | chemical drug            | -1.953 | 9.21E-07 |
| oltipraz                   |        | chemical drug            | -1.953 | 3.86E-02 |
| arsenite                   |        | chemical toxicant        | -1.951 | 3.84E-05 |
| PHLPP1                     | -0.465 | enzyme                   | -1.951 | 1.79E-03 |
| GLI3                       | 0.108  | transcription regulator  | -1.941 | 1.65E-02 |
| Stat3-Stat3                |        | complex                  | -1.941 | 3.37E-02 |
| PRKCE                      | -0.178 | kinase                   | -1.941 | 4.79E-02 |
| TGM2                       | -1.165 | enzyme                   | -1.937 | 2.04E-02 |
| NAMPT                      | -0.572 | cytokine                 | -1.915 | 8.67E-05 |
| carboplatin                |        | chemical drug            | -1.912 | 3.09E-03 |
| POU5F1                     | -0.109 | transcription regulator  | -1.912 | 3.24E-02 |
| di(2-ethylhexyl) phthalate |        | chemical toxicant        | -1.900 | 2.12E-02 |
| GH1                        | 0.262  | growth factor            | -1.884 | 1.51E-04 |
| benzo(a)pyrene             |        | chemical toxicant        | -1.879 | 2.93E-04 |
| testosterone               |        | chemical - endogenous    | -1.864 | 1.78E-03 |
| Calcineurin protein(s)     |        | complex                  | -1.842 | 1.43E-02 |
| HSF1                       | 0.277  | transcription regulator  | -1.841 | 1.36E-04 |
| sodium arsenite            |        | chemical drug            | -1.834 | 2.69E-03 |
| EPO                        | 0.099  | cytokine                 | -1.834 | 7.26E-03 |
| melatonin                  |        | chemical - endogenous    | -1.826 | 6.95E-03 |
| NFKB1                      | -0.098 | transcription regulator  | -1.810 | 5.42E-04 |
| FGFR2                      | -0.219 | kinase                   | -1.792 | 1.20E-02 |
| IL2                        | 0.164  | cytokine                 | -1.786 | 3.77E-04 |
| ADIPOQ                     | 0.150  | other                    | -1.762 | 1.08E-01 |
| SMARCA4                    | -0.830 | transcription regulator  | -1.746 | 2.15E-04 |
| desmopressin               |        | biologic drug            | -1.744 | 6.95E-03 |
| TGFB2                      | -0.997 | growth factor            | -1.737 | 9.80E-04 |
| STK11                      | -0.136 | kinase                   | -1.732 | 1.77E-02 |
| ATM                        | -0.373 | kinase                   | -1.726 | 4.43E-02 |
| ATF6                       | -0.414 | transcription regulator  | -1.718 | 3.00E-02 |
| Hsp90                      |        | group                    | -1.709 | 1.89E-03 |
| TP63                       | -0.226 | transcription regulator  | -1.700 | 7.43E-04 |
| IGF2                       | -0.316 | growth factor            | -1.698 | 4.12E-03 |
| IL15                       | -0.289 | cytokine                 | -1.684 | 1.64E-03 |
| 2-deoxyglucose             |        | chemical drug            | -1.681 | 3.38E-05 |
| EGFR                       | -1.021 | kinase                   | -1.667 | 1.38E-03 |
| tamoxifen                  |        | chemical drug            | -1.638 | 4.86E-05 |
| NEDD9                      | 0.424  | other                    | -1.633 | 8.69E-03 |
| Pam3-Cys                   |        | chemical toxicant        | -1.633 | 1.30E-02 |

|                          |        |                                   |        |          |
|--------------------------|--------|-----------------------------------|--------|----------|
| tunicamycin              |        | chemical - endogenous             | -1.632 | 2.38E-02 |
| dibutyl phthalate        |        | chemical toxicant                 | -1.630 | 4.74E-03 |
| SPI1                     | 0.116  | transcription regulator           | -1.625 | 1.71E-02 |
| cisplatin                |        | chemical drug                     | -1.589 | 1.36E-04 |
| MAP2K4                   | -0.274 | kinase                            | -1.588 | 1.51E-03 |
| ELF3                     | -0.554 | transcription regulator           | -1.577 | 9.20E-04 |
| TGFA                     | 0.187  | growth factor                     | -1.573 | 6.44E-03 |
| BMP7                     | 0.445  | growth factor                     | -1.552 | 2.39E-03 |
| SMAD4                    | -0.370 | transcription regulator           | -1.549 | 3.56E-03 |
| AR                       | 0.135  | ligand-dependent nuclear receptor | -1.549 | 3.15E-02 |
| WT1                      | 0.200  | transcription regulator           | -1.545 | 1.14E-02 |
| cadmium                  |        | chemical toxicant                 | -1.542 | 2.44E-02 |
| WNT3A                    |        | cytokine                          | -1.533 | 4.94E-02 |
| 4-methylnitrosoamino-1   |        | chemical toxicant                 | -1.532 | 8.86E-04 |
| INSR                     | -0.658 | kinase                            | -1.521 | 3.71E-03 |
| Mek                      |        | group                             | -1.502 | 1.13E-04 |
| fulvestrant              |        | chemical drug                     | -1.481 | 4.12E-04 |
| PTEN                     | 0.324  | phosphatase                       | -1.458 | 2.90E-06 |
| hyaluronic acid          |        | chemical - endogenous             | -1.442 | 2.17E-03 |
| TERT                     | 0.103  | enzyme                            | -1.432 | 1.03E-02 |
| triamcinolone acetonide  |        | chemical drug                     | -1.428 | 3.57E-08 |
| arachidonic acid         |        | chemical - endogenous             | -1.424 | 1.08E-02 |
| phorbol 12,13-dibutyrate |        | chemical - endogenous             | -1.400 | 3.00E-02 |
| MAP3K1                   | -0.120 | kinase                            | -1.396 | 4.12E-04 |
| HOXA9                    | 0.390  | transcription regulator           | -1.387 | 1.66E-07 |
| ELF4                     | -0.156 | transcription regulator           | -1.372 | 4.70E-03 |
| Gm-csf                   |        | group                             | -1.346 | 4.43E-02 |
| vitamin B12              |        | chemical - endogenous             | -1.342 | 8.41E-03 |
| 2-cyano-3,12-dioxole     |        | chemical drug                     | -1.342 | 1.05E-05 |
| IHH                      | 0.055  | enzyme                            | -1.330 | 1.83E-03 |
| MAPK9                    | -0.522 | kinase                            | -1.285 | 1.07E-02 |
| isobutylmethylxanthine   |        | chemical toxicant                 | -1.268 | 1.70E-02 |
| ELANE                    | 0.143  | peptidase                         | -1.254 | 7.18E-04 |
| HTT                      | -0.258 | transcription regulator           | -1.208 | 8.76E-04 |
| ursodeoxycholic acid     |        | chemical - endogenous             | -1.195 | 1.93E-02 |
| MAPK3                    | -0.245 | other                             | -1.177 | 3.58E-05 |
| nitroarginine            |        | chemical reagent                  | -1.172 | 1.37E-02 |
| NR3C2                    | -0.076 | ligand-dependent nuclear receptor | -1.168 | 1.84E-02 |
| resiquimod               |        | chemical drug                     | -1.154 | 3.48E-02 |
| IL13                     | 0.241  | cytokine                          | -1.146 | 9.99E-05 |
| TSC1                     | -0.530 | other                             | -1.131 | 3.86E-02 |
| SMAD3                    | -0.845 | transcription regulator           | -1.123 | 6.43E-03 |
| CD44                     | -0.174 | enzyme                            | -1.114 | 1.20E-02 |
| FSHB                     | 0.163  | other                             | -1.103 | 1.24E-02 |
| CYP27B1                  | -0.055 | other                             | -1.103 | 2.67E-02 |
| 1-methyl-4-phenyl-1,2,3  |        | chemical toxicant                 | -1.091 | 4.79E-02 |
| SOX9                     | -0.765 | other                             | -1.069 | 3.53E-03 |
| NCAM1                    | -1.178 | other                             | -1.067 | 8.03E-03 |
| heparin                  |        | chemical - endogenous             | -1.067 | 4.46E-02 |
| CYR61                    | 0.477  | other                             | -1.060 | 6.48E-03 |
| 4-hydroxytamoxifen       |        | chemical drug                     | -1.042 | 1.41E-04 |
| indomethacin             |        | chemical drug                     | -1.038 | 2.49E-03 |

|                        |        |                           |        |          |
|------------------------|--------|---------------------------|--------|----------|
| NRF1                   | 0.215  | transcription regulator   | -1.032 | 9.17E-03 |
| EIF2AK3                | -0.155 | kinase                    | -1.029 | 9.30E-04 |
| D-glucose              |        | chemical - endogenous     | -1.025 | 5.48E-08 |
| beta-naphthoflavone    |        | chemical toxicant         | -1.024 | 4.43E-02 |
| PRLR                   | 0.419  | transmembrane recepto     | -1.023 | 3.83E-03 |
| 8-bromoguanosine 3',5' |        | chemical - kinase inhibit | -1.000 | 1.82E-02 |
| NOG                    |        | growth factor             | -1.000 | 2.30E-02 |
| HRAS                   | -0.154 | enzyme                    | -0.986 | 1.41E-06 |
| genistein              |        | chemical drug             | -0.984 | 2.37E-03 |
| diethylstilbestrol     |        | chemical drug             | -0.952 | 4.77E-05 |
| estrogen               |        | chemical drug             | -0.921 | 2.64E-02 |
| AKT1                   | -0.144 | kinase                    | -0.908 | 1.69E-02 |
| PDGFB                  | 0.082  | growth factor             | -0.902 | 4.81E-02 |
| 4-hydroxynonenal       |        | chemical toxicant         | -0.849 | 3.86E-02 |
| PDX1                   | 0.359  | transcription regulator   | -0.832 | 3.13E-03 |
| methapyrilene          |        | chemical drug             | -0.816 | 2.79E-02 |
| HNF4A                  | 0.487  | transcription regulator   | -0.801 | 2.51E-04 |
| eicosapentenoic acid   |        | chemical drug             | -0.799 | 3.09E-03 |
| desipramine            |        | chemical drug             | -0.753 | 2.15E-02 |
| OXT                    | -0.003 | other                     | -0.728 | 3.83E-03 |
| PTHLH                  | -0.284 | other                     | -0.728 | 6.48E-03 |
| RAC1                   | -0.026 | enzyme                    | -0.707 | 2.27E-02 |
| IL17RA                 | -0.072 | transmembrane recepto     | -0.689 | 3.86E-02 |
| CXCL12                 | -0.111 | cytokine                  | -0.665 | 2.61E-02 |
| bexarotene             |        | chemical drug             | -0.664 | 2.59E-02 |
| RHOB                   | 0.169  | enzyme                    | -0.655 | 1.79E-03 |
| NREP                   | -0.234 | other                     | -0.655 | 6.27E-03 |
| GLI2                   | -0.064 | transcription regulator   | -0.647 | 2.64E-02 |
| streptozocin           |        | chemical drug             | -0.616 | 3.52E-02 |
| tetracycline           |        | chemical drug             | -0.593 | 3.55E-02 |
| GATA6                  | 0.132  | transcription regulator   | -0.485 | 4.07E-02 |
| FGF1                   | 0.520  | growth factor             | -0.483 | 1.37E-02 |
| NR112                  | 0.341  | ligand-dependent nuclea   | -0.470 | 3.41E-03 |
| PRKAR1A                | -0.182 | kinase                    | -0.468 | 2.75E-03 |
| TNC                    | -0.352 | other                     | -0.447 | 4.74E-03 |
| VTN                    | -0.080 | other                     | -0.434 | 1.58E-02 |
| raloxifene             |        | chemical drug             | -0.424 | 3.24E-09 |
| ITGB3                  | -1.997 | transmembrane recepto     | -0.422 | 2.25E-03 |
| 9Z,11E-octadecadienoic |        | chemical - endogenous     | -0.392 | 2.15E-02 |
| RHO                    | -0.140 | G-protein coupled recep   | -0.378 | 3.02E-02 |
| NOTCH1                 | 0.117  | transcription regulator   | -0.378 | 1.60E-03 |
| valproic acid          |        | chemical drug             | -0.367 | 3.65E-03 |
| 4-phenylbutyric acid   |        | chemical - endogenous     | -0.333 | 5.66E-03 |
| NR3C1                  | -0.378 | ligand-dependent nuclea   | -0.325 | 2.03E-06 |
| anisomycin             |        | chemical - endogenous     | -0.287 | 3.69E-04 |
| carbamylocholone       |        | chemical drug             | -0.285 | 4.14E-02 |
| IL10                   | 0.285  | cytokine                  | -0.274 | 1.00E-04 |
| AGTR1                  | 0.286  | G-protein coupled recep   | -0.218 | 3.74E-02 |
| mifepristone           |        | chemical drug             | -0.158 | 2.49E-04 |
| WNT5A                  | -0.688 | cytokine                  | -0.147 | 4.07E-02 |
| CYP19A1                | 0.017  | enzyme                    | -0.131 | 3.02E-02 |
| FAS                    | -0.326 | transmembrane recepto     | -0.100 | 1.65E-11 |

|                          |        |                           |        |          |
|--------------------------|--------|---------------------------|--------|----------|
| K+                       |        | chemical - endogenous     | -0.094 | 3.74E-02 |
| MAFG                     | -0.049 | transcription regulator   | -0.083 | 1.01E-02 |
| epigallocatechin-gallate |        | chemical drug             | -0.072 | 1.78E-03 |
| Lh                       |        | complex                   | -0.054 | 9.97E-07 |
| MAPK1                    | -0.168 | kinase                    | -0.028 | 2.04E-04 |
| lenalidomide             |        | chemical drug             | 0.000  | 3.14E-02 |
| troglitazone             |        | chemical drug             | 0.040  | 4.63E-03 |
| MAP3K7                   | -0.530 | kinase                    | 0.042  | 8.66E-05 |
| Gsk3                     |        | group                     | 0.138  | 2.55E-02 |
| camptothecin             |        | chemical toxicant         | 0.141  | 1.56E-11 |
| AHR                      | -0.804 | ligand-dependent nuclea   | 0.149  | 3.34E-04 |
| cyclosporin A            |        | biologic drug             | 0.152  | 1.31E-03 |
| EZH2                     | -0.042 | transcription regulator   | 0.203  | 4.40E-04 |
| phosphate                |        | chemical - endogenous     | 0.266  | 5.38E-03 |
| PAX3                     | 0.422  | transcription regulator   | 0.277  | 6.84E-05 |
| tetrachlorodibenzodioxii |        | chemical toxicant         | 0.286  | 6.35E-03 |
| nifedipine               |        | chemical drug             | 0.290  | 3.31E-02 |
| CDH1                     | -0.262 | other                     | 0.294  | 9.17E-03 |
| MGAT5                    | -0.579 | enzyme                    | 0.305  | 4.80E-03 |
| tacrolimus               |        | chemical drug             | 0.324  | 1.04E-02 |
| NANOG                    | 0.103  | transcription regulator   | 0.378  | 5.34E-03 |
| FOS                      | -0.689 | transcription regulator   | 0.421  | 7.05E-09 |
| KRAS                     | -0.339 | enzyme                    | 0.432  | 5.11E-03 |
| topotecan                |        | chemical drug             | 0.455  | 1.86E-04 |
| simvastatin              |        | chemical drug             | 0.467  | 4.34E-02 |
| methylselenic acid       |        | chemical reagent          | 0.478  | 7.79E-07 |
| NUPR1                    | 0.784  | transcription regulator   | 0.548  | 2.10E-04 |
| PSEN2                    | -0.039 | peptidase                 | 0.570  | 5.87E-03 |
| ACOX1                    | -0.668 | enzyme                    | 0.577  | 1.62E-02 |
| W7                       |        | chemical reagent          | 0.577  | 1.24E-02 |
| hydrocortisone           |        | chemical - endogenous     | 0.736  | 2.81E-02 |
| butyric acid             |        | chemical - endogenous     | 0.744  | 3.21E-04 |
| TFAP2A                   | -0.826 | transcription regulator   | 0.763  | 4.30E-04 |
| androgen                 |        | chemical - other          | 0.786  | 1.54E-07 |
| verapamil                |        | chemical drug             | 0.816  | 5.54E-03 |
| BCL6                     | -0.566 | transcription regulator   | 0.817  | 2.81E-02 |
| staurosporine            |        | chemical - kinase inhibit | 0.847  | 3.40E-03 |
| iron                     |        | chemical - endogenous     | 0.849  | 3.41E-02 |
| MYC                      | 0.014  | transcription regulator   | 0.888  | 7.44E-03 |
| FYN                      | 0.275  | kinase                    | 0.899  | 6.32E-03 |
| KIAA1524                 |        | other                     | 0.923  | 4.57E-03 |
| GnRH analog              |        | biologic drug             | 0.961  | 2.80E-05 |
| cryptotanshinone         |        | chemical drug             | 1.000  | 7.44E-04 |
| ZNF217                   | -0.441 | transcription regulator   | 1.000  | 1.21E-02 |
| LAMC1                    | -0.170 | other                     | 1.067  | 4.80E-03 |
| plicamycin               |        | chemical drug             | 1.121  | 2.28E-03 |
| estrogen receptor        |        | group                     | 1.130  | 1.34E-06 |
| 26s Proteasome           |        | complex                   | 1.141  | 4.46E-02 |
| YY1                      | -0.455 | transcription regulator   | 1.195  | 2.13E-02 |
| KEAP1                    | -0.221 | transcription regulator   | 1.214  | 2.58E-03 |
| cycloheximide            |        | chemical reagent          | 1.216  | 3.13E-05 |
| HOXA10                   | 0.380  | transcription regulator   | 1.265  | 2.59E-02 |



|                          |        |                           |           |       |          |
|--------------------------|--------|---------------------------|-----------|-------|----------|
| PP2/AG1879 tyrosine k    |        | chemical - kinase inhibit |           | 1.293 | 5.09E-03 |
| KLF2                     | -0.088 | transcription regulator   |           | 1.342 | 2.02E-02 |
| Igm                      |        | complex                   |           | 1.387 | 2.78E-02 |
| Ro31-8220                |        | chemical - kinase inhibit |           | 1.387 | 4.57E-02 |
| GPX1                     | 0.108  | enzyme                    |           | 1.400 | 2.30E-02 |
| cerivastatin             |        | chemical drug             |           | 1.406 | 7.71E-03 |
| H-7                      |        | chemical - kinase inhibit |           | 1.467 | 1.65E-02 |
| CD28                     | 0.239  | transmembrane recepto     |           | 1.512 | 2.95E-02 |
| WISP2                    | 0.160  | growth factor             |           | 1.671 | 8.69E-03 |
| KN 93                    |        | chemical - kinase inhibit |           | 1.693 | 3.86E-02 |
| SP600125                 |        | chemical - kinase inhibit |           | 1.742 | 3.06E-03 |
| CLDN7                    | -0.137 | other                     |           | 1.782 | 1.79E-01 |
| Hdac                     |        | group                     |           | 1.870 | 6.36E-03 |
| pyrrolidine dithiocarbam |        | chemical reagent          |           | 1.888 | 3.74E-02 |
| IRF4                     | -0.067 | transcription regulator   |           | 1.897 | 3.52E-02 |
| BTRC                     | 0.121  | enzyme                    |           | 1.928 | 1.24E-02 |
| gossypol                 |        | chemical toxicant         |           | 1.934 | 4.80E-03 |
| wortmannin               |        | chemical - kinase inhibit |           | 1.937 | 1.82E-03 |
| ADAMTS12                 | 0.101  | other                     |           | 1.949 | 9.97E-03 |
| N(6)-(3-iodobenzyl)-5'-N |        | chemical drug             |           | 1.960 | 1.38E-03 |
| prednisolone             |        | chemical drug             |           | 1.964 | 2.60E-03 |
| DACH1                    | 0.192  | transcription regulator   |           | 1.964 | 3.37E-02 |
| STUB1                    | 0.048  | enzyme                    |           | 1.964 | 3.37E-02 |
| ciglitazone              |        | chemical drug             |           | 1.964 | 4.04E-01 |
| mir-145                  |        | microRNA                  |           | 1.982 | 5.41E-04 |
| ABCB4                    | 0.023  | transporter               |           | 1.997 | 4.93E-02 |
| mir-210                  |        | microRNA                  | Activated | 2.000 | 2.46E-02 |
| DKK1                     | 0.810  | growth factor             | Activated | 2.043 | 3.61E-03 |
| Go 6976                  |        | chemical - kinase inhibit | Activated | 2.178 | 4.54E-03 |
| geldanamycin             |        | chemical - endogenous     | Activated | 2.188 | 4.85E-03 |
| DCN                      | 0.213  | other                     | Activated | 2.190 | 7.11E-02 |
| Bay 11-7082              |        | chemical - kinase inhibit | Activated | 2.216 | 3.41E-02 |
| tempol                   |        | chemical drug             | Activated | 2.219 | 2.75E-03 |
| SU6656                   |        | chemical toxicant         | Activated | 2.219 | 1.58E-02 |
| bicalutamide             |        | chemical drug             | Activated | 2.219 | 2.67E-02 |
| JAG2                     | -0.058 | growth factor             | Activated | 2.219 | 3.74E-02 |
| TAF4                     | -0.108 | transcription regulator   | Activated | 2.219 | 4.43E-02 |
| miR-22-3p (miRNAs w/     |        | mature microRNA           | Activated | 2.236 | 4.74E-03 |
| Sb202190                 |        | chemical - kinase inhibit | Activated | 2.283 | 3.93E-02 |
| Immunoglobulin           |        | complex                   | Activated | 2.361 | 8.05E-04 |
| calphostin C             |        | chemical - kinase inhibit | Activated | 2.396 | 5.09E-03 |
| mir-182                  |        | microRNA                  | Activated | 2.412 | 6.48E-03 |
| diphenyleneiodonium      |        | chemical reagent          | Activated | 2.414 | 3.10E-02 |
| APOE                     | 1.323  | transporter               | Activated | 2.423 | 1.38E-03 |
| TAB1                     | 0.229  | enzyme                    | Activated | 2.449 | 2.26E-03 |
| tanespimycin             |        | chemical drug             | Activated | 2.496 | 1.85E-03 |
| MEOX2                    | 0.108  | transcription regulator   | Activated | 2.565 | 3.10E-03 |
| MDM2                     | 0.541  | transcription regulator   | Activated | 2.592 | 6.32E-03 |
| MGEA5                    | -0.892 | enzyme                    | Activated | 2.600 | 2.40E-04 |
| miR-182-5p (and other    |        | mature microRNA           | Activated | 2.607 | 1.31E-03 |
| SERPINE1                 | 0.659  | other                     | Activated | 2.619 | 2.78E-04 |
| SPDEF                    | -0.189 | transcription regulator   | Activated | 2.646 | 8.43E-03 |

|                         |        |                           |           |       |          |
|-------------------------|--------|---------------------------|-----------|-------|----------|
| miR-29b-3p (and other   |        | mature microRNA           | Activated | 2.813 | 4.01E-03 |
| alefacept               |        | biologic drug             | Activated | 2.828 | 7.24E-03 |
| curcumin                |        | chemical drug             | Activated | 3.135 | 2.69E-02 |
| COL18A1                 | 0.228  | other                     | Activated | 3.206 | 2.19E-04 |
| H89                     |        | chemical - kinase inhibit | Activated | 3.227 | 1.20E-03 |
| IL1RN                   | 0.363  | cytokine                  | Activated | 3.257 | 3.72E-02 |
| GFI1                    | -0.158 | transcription regulator   | Activated | 3.317 | 1.17E-04 |
| SMAD7                   | 0.349  | transcription regulator   | Activated | 3.440 | 7.32E-03 |
| miR-16-5p (and other r  |        | mature microRNA           | Activated | 3.450 | 8.39E-03 |
| actinomycin D           |        | chemical drug             | Activated | 3.626 | 6.19E-04 |
| IgG                     |        | complex                   | Activated | 3.742 | 6.81E-03 |
| miR-30c-5p (and other i |        | mature microRNA           | Activated | 3.790 | 8.66E-05 |
| Alpha catenin           |        | group                     | Activated | 3.945 | 2.22E-04 |
| miR-124-3p (and other   |        | mature microRNA           | Activated | 4.214 | 8.01E-03 |
| miR-1 (and other miRN.  |        | mature microRNA           | Activated | 4.305 | 3.26E-03 |
| CD3                     |        | complex                   | Activated | 4.332 | 1.90E-05 |
| U0126                   |        | chemical - kinase inhibit | Activated | 4.360 | 6.36E-08 |
| miR-155-5p (miRNAs w    |        | mature microRNA           | Activated | 4.528 | 6.51E-06 |
| PD98059                 |        | chemical - kinase inhibit | Activated | 5.427 | 1.13E-10 |
| LY294002                |        | chemical - kinase inhibit | Activated | 5.616 | 4.73E-07 |
| SB203580                |        | chemical - kinase inhibit | Activated | 5.772 | 2.47E-05 |
| Sos                     |        | group                     |           |       | 6.54E-06 |
| FOXF1                   | 0.132  | transcription regulator   |           |       | 1.86E-05 |
| HNRNPA2B1               | -0.343 | other                     |           |       | 1.20E-04 |
| TCF                     |        | group                     |           |       | 1.33E-04 |
| GAL3ST1                 | -0.017 | enzyme                    |           |       | 5.40E-04 |
| thymeleatoxin           |        | chemical toxicant         |           |       | 5.40E-04 |
| PPP3CA                  | -0.623 | phosphatase               |           |       | 5.55E-04 |
| HGS                     | -0.412 | other                     |           |       | 7.44E-04 |
| CLOCK                   | -0.691 | transcription regulator   |           |       | 1.25E-03 |
| Gpcr                    |        | group                     |           |       | 1.30E-03 |
| 7S NGF                  |        | complex                   |           |       | 1.30E-03 |
| USP8                    | 0.037  | peptidase                 |           |       | 1.30E-03 |
| aminoglutethimide       |        | chemical drug             |           |       | 1.30E-03 |
| butylated hydroxytoluen |        | chemical toxicant         |           |       | 1.30E-03 |
| MECOM                   | 0.238  | other                     |           |       | 1.83E-03 |
| SP3                     | -0.131 | transcription regulator   |           |       | 1.93E-03 |
| SOD1                    | -0.183 | enzyme                    |           |       | 2.24E-03 |
| PRKAG3                  |        | kinase                    |           |       | 2.41E-03 |
| YES1                    | -0.537 | kinase                    |           |       | 2.50E-03 |
| GSK3A                   | 0.167  | kinase                    |           |       | 2.50E-03 |
| ZYX                     | 0.363  | other                     |           |       | 2.50E-03 |
| alpha-ketoisocaproic ac |        | chemical - endogenous     |           |       | 2.50E-03 |
| acrylamide              |        | chemical toxicant         |           |       | 2.50E-03 |
| Mre11                   |        | group                     |           |       | 2.71E-03 |
| FFAR4                   |        | G-protein coupled recep   |           |       | 2.71E-03 |
| CNPY3                   | -0.397 | other                     |           |       | 2.71E-03 |
| MDC1                    | 0.337  | other                     |           |       | 2.71E-03 |
| potassium channel       |        | group                     |           |       | 2.71E-03 |
| VAX2                    | -0.101 | transcription regulator   |           |       | 2.71E-03 |
| NMB                     | -0.224 | other                     |           |       | 2.71E-03 |
| RILP                    |        | other                     |           |       | 2.71E-03 |

|                           |        |                          |          |
|---------------------------|--------|--------------------------|----------|
| USP2                      | 0.157  | peptidase                | 2.71E-03 |
| TH                        | 0.123  | enzyme                   | 2.71E-03 |
| ENC1                      | 0.322  | peptidase                | 2.71E-03 |
| nisoldipine               |        | chemical drug            | 2.71E-03 |
| NKX3-1                    | -0.981 | transcription regulator  | 3.53E-03 |
| BHLHA15                   |        | transcription regulator  | 3.57E-03 |
| PGF                       | -0.622 | growth factor            | 3.83E-03 |
| DDB2                      | 0.373  | other                    | 4.20E-03 |
| BAG1                      | -0.171 | other                    | 4.80E-03 |
| SUZ12                     | 0.274  | enzyme                   | 5.27E-03 |
| LMNA                      | 0.186  | other                    | 6.13E-03 |
| ADCY                      |        | group                    | 6.27E-03 |
| sphingosylphosphochol     |        | chemical - endogenous    | 6.46E-03 |
| LRP2                      | 0.209  | transporter              | 6.46E-03 |
| miR-208a-3p (and other    |        | mature microRNA          | 6.46E-03 |
| CDK6                      | -0.213 | kinase                   | 6.46E-03 |
| APEX1                     | 0.361  | enzyme                   | 6.46E-03 |
| cordycepin                |        | chemical drug            | 6.46E-03 |
| ADRA1B                    | 0.129  | G-protein coupled recep  | 7.18E-03 |
| ADAM10                    | -0.228 | peptidase                | 7.71E-03 |
| ritonavir                 |        | chemical drug            | 7.79E-03 |
| Dynamain                  |        | group                    | 7.84E-03 |
| Stat1-Stat3               |        | complex                  | 7.84E-03 |
| TRA2B                     | -0.328 | other                    | 7.84E-03 |
| EMP2                      | 0.144  | other                    | 7.84E-03 |
| LAMP2                     | 0.325  | enzyme                   | 7.84E-03 |
| TRAF7                     |        | enzyme                   | 7.84E-03 |
| MMP8                      | -0.047 | peptidase                | 7.84E-03 |
| MATK                      | -0.065 | kinase                   | 7.84E-03 |
| RING1                     | -0.170 | transcription regulator  | 7.84E-03 |
| VGF                       | 0.029  | growth factor            | 7.84E-03 |
| PD 150606                 |        | chemical - protease inhi | 7.84E-03 |
| glutathione diethyl ester |        | chemical reagent         | 7.84E-03 |
| BTG2                      | -0.183 | transcription regulator  | 8.03E-03 |
| CTF1                      | -0.047 | cytokine                 | 8.41E-03 |
| ZEB1                      | -0.407 | transcription regulator  | 8.41E-03 |
| HSF2                      | 0.134  | transcription regulator  | 8.41E-03 |
| BRD2                      | -0.449 | kinase                   | 8.69E-03 |
| miR-375-3p (and other     |        | mature microRNA          | 9.32E-03 |
| methylene blue            |        | chemical drug            | 9.32E-03 |
| [D-Ala2,N-Me-Phe4,Gly     |        | chemical reagent         | 9.32E-03 |
| anti-benzo(a)pyrene-dic   |        | chemical toxicant        | 9.32E-03 |
| aurothioglucose           |        | chemical drug            | 9.32E-03 |
| FOLR1                     | -0.431 | transporter              | 9.56E-03 |
| WNT7A                     | -0.088 | cytokine                 | 1.01E-02 |
| HSP90B1                   | -0.323 | other                    | 1.01E-02 |
| ADRA1D                    | 0.275  | G-protein coupled recep  | 1.03E-02 |
| vitamin D                 |        | chemical drug            | 1.14E-02 |
| TCF4                      | 1.044  | transcription regulator  | 1.15E-02 |
| IRAK4                     | -0.114 | kinase                   | 1.21E-02 |
| TFEC                      | 0.044  | transcription regulator  | 1.24E-02 |
| SBDS                      |        | other                    | 1.27E-02 |

|                          |        |                           |          |
|--------------------------|--------|---------------------------|----------|
| EPHB1                    | 0.205  | kinase                    | 1.28E-02 |
| asoprisnil               |        | chemical drug             | 1.28E-02 |
| HSPA1A/HSPA1B            | -0.763 | other                     | 1.28E-02 |
| PDGFRB                   | 0.109  | kinase                    | 1.28E-02 |
| MXD1                     | 0.244  | transcription regulator   | 1.28E-02 |
| HOXC9                    |        | transcription regulator   | 1.28E-02 |
| AFP                      | 0.081  | transporter               | 1.28E-02 |
| calmidazolium            |        | chemical drug             | 1.28E-02 |
| zinc sulfate             |        | chemical drug             | 1.28E-02 |
| tyrphostin AG 1296       |        | chemical - kinase inhibit | 1.28E-02 |
| Pro-inflammatory Cytok   |        | group                     | 1.29E-02 |
| GNA15                    | -0.200 | enzyme                    | 1.29E-02 |
| BMI1                     | -0.024 | transcription regulator   | 1.47E-02 |
| LRP5                     | -0.144 | transmembrane recepto     | 1.51E-02 |
| BLVRA                    | 0.148  | enzyme                    | 1.51E-02 |
| JDP2                     |        | transcription regulator   | 1.51E-02 |
| GPIIB-IIIa               |        | complex                   | 1.51E-02 |
| CDC25B                   | -1.199 | phosphatase               | 1.51E-02 |
| HMGN1                    | 0.146  | transcription regulator   | 1.51E-02 |
| miR-219-5p (and other    |        | mature microRNA           | 1.51E-02 |
| CALCR                    | 0.246  | G-protein coupled recep   | 1.51E-02 |
| GCLC                     | -0.538 | enzyme                    | 1.51E-02 |
| LRIG1                    | -0.710 | other                     | 1.51E-02 |
| SNCG                     | -0.214 | other                     | 1.51E-02 |
| CHRM4                    | -0.135 | G-protein coupled recep   | 1.51E-02 |
| KRIT1                    | 0.192  | other                     | 1.51E-02 |
| VSNL1                    | 0.124  | other                     | 1.51E-02 |
| IGKC                     | -0.332 | other                     | 1.51E-02 |
| GCLM                     | 0.668  | enzyme                    | 1.51E-02 |
| SLC20A2                  | 0.001  | transporter               | 1.51E-02 |
| phenylmethylsulfonyl flu |        | chemical - protease inhi  | 1.51E-02 |
| clomiphene               |        | chemical drug             | 1.51E-02 |
| liarozole                |        | chemical drug             | 1.51E-02 |
| ibotenic acid            |        | chemical toxicant         | 1.51E-02 |
| citalopram               |        | chemical drug             | 1.51E-02 |
| oxytetracycline          |        | chemical drug             | 1.51E-02 |
| apamin                   |        | chemical toxicant         | 1.51E-02 |
| MTOR                     | -0.152 | kinase                    | 1.62E-02 |
| TRIM28                   | 0.014  | transcription regulator   | 1.65E-02 |
| ursolic acid             |        | chemical - endogenous     | 1.65E-02 |
| azathioprine             |        | chemical drug             | 1.69E-02 |
| sorbitol                 |        | chemical - endogenous     | 1.69E-02 |
| ALOX12                   | -0.304 | enzyme                    | 1.69E-02 |
| SOX4                     | 0.250  | transcription regulator   | 1.69E-02 |
| TNFRSF11B                | 0.207  | transmembrane recepto     | 1.69E-02 |
| CSK                      | -0.030 | kinase                    | 1.69E-02 |
| MAFF                     | -0.569 | transcription regulator   | 1.69E-02 |
| L-685,458                |        | chemical - protease inhi  | 1.69E-02 |
| amiloride                |        | chemical drug             | 1.69E-02 |
| halofuginone             |        | chemical drug             | 1.80E-02 |
| NTRK1                    | -0.099 | kinase                    | 1.81E-02 |
| BACH1                    | -0.460 | transcription regulator   | 1.81E-02 |

|                           |        |                         |          |
|---------------------------|--------|-------------------------|----------|
| SMO                       | 0.277  | G-protein coupled recep | 1.91E-02 |
| mir-132                   |        | microRNA                | 2.15E-02 |
| HMGA2                     | 0.025  | enzyme                  | 2.15E-02 |
| miR-141-3p (and other     |        | mature microRNA         | 2.17E-02 |
| KISS1                     | 0.118  | other                   | 2.17E-02 |
| PDGFRA                    | -0.673 | kinase                  | 2.17E-02 |
| SMURF2                    | -0.068 | enzyme                  | 2.17E-02 |
| riboflavin                |        | chemical - endogenous   | 2.17E-02 |
| galactose                 |        | chemical - endogenous   | 2.17E-02 |
| TEAD4                     | -0.225 | transcription regulator | 2.36E-02 |
| inositol                  |        | chemical drug           | 2.44E-02 |
| TPPP2                     |        | other                   | 2.44E-02 |
| Nicotinic acetylcholine r |        | complex                 | 2.44E-02 |
| YY2                       | 0.281  | other                   | 2.44E-02 |
| GLIS1                     |        | other                   | 2.44E-02 |
| FGR                       | 0.204  | kinase                  | 2.44E-02 |
| XPC                       | -0.290 | other                   | 2.44E-02 |
| APLP2                     | -0.451 | other                   | 2.44E-02 |
| PTN                       | 0.338  | growth factor           | 2.44E-02 |
| MLLT3                     | -0.380 | other                   | 2.44E-02 |
| RSC1A1                    |        | other                   | 2.44E-02 |
| IAPP                      | -0.058 | other                   | 2.44E-02 |
| RPL11                     | 0.041  | other                   | 2.44E-02 |
| PSMD4                     | 0.232  | other                   | 2.44E-02 |
| FRK                       | -0.042 | kinase                  | 2.44E-02 |
| MBD4                      | -0.348 | enzyme                  | 2.44E-02 |
| NDFIP1                    | -0.748 | other                   | 2.44E-02 |
| acetazolamide             |        | chemical drug           | 2.44E-02 |
| famotidine                |        | chemical drug           | 2.44E-02 |
| 6-cyano-7-nitroquinoxal   |        | chemical reagent        | 2.44E-02 |
| Collagen type V           |        | complex                 | 2.44E-02 |
| aurothiomalate            |        | chemical drug           | 2.44E-02 |
| catechol                  |        | chemical - endogenous   | 2.44E-02 |
| GLP-1 (7-36) amide        |        | chemical drug           | 2.44E-02 |
| ELAVL1                    | -0.154 | other                   | 2.44E-02 |
| Calcineurin A             |        | group                   | 2.52E-02 |
| ENG                       | -0.275 | other                   | 2.52E-02 |
| mir-155                   |        | microRNA                | 2.55E-02 |
| IL11                      | -0.624 | cytokine                | 2.55E-02 |
| 17-dimethylaminoethyla    |        | chemical drug           | 2.72E-02 |
| BMP                       |        | group                   | 2.72E-02 |
| Pkg                       |        | group                   | 2.72E-02 |
| SLC9A3R1                  | -0.075 | other                   | 2.72E-02 |
| CFB                       | -1.142 | peptidase               | 2.72E-02 |
| TRPV1                     | 0.053  | ion channel             | 2.72E-02 |
| CSF2RA                    | -0.322 | transmembrane recepto   | 2.72E-02 |
| RPS6KA5                   | -0.888 | other                   | 2.72E-02 |
| quinpirole                |        | chemical reagent        | 2.72E-02 |
| 1-chloro-2-(2,2,2-trichlo |        | chemical toxicant       | 2.72E-02 |
| auranofin                 |        | chemical drug           | 2.72E-02 |
| SIN3A                     |        | transcription regulator | 2.82E-02 |
| TAL1                      | -0.093 | other                   | 2.83E-02 |

|                          |        |                         |          |
|--------------------------|--------|-------------------------|----------|
| 7-ethyl-10-hydroxy-cam   |        | chemical drug           | 2.93E-02 |
| ceramide                 |        | chemical - endogenous   | 2.93E-02 |
| ONECUT1                  | 0.025  | transcription regulator | 2.94E-02 |
| JUND                     | 0.093  | transcription regulator | 3.02E-02 |
| TCOF1                    | 0.501  | transporter             | 3.07E-02 |
| PTGES                    | -0.580 | enzyme                  | 3.10E-02 |
| omeprazole               |        | chemical drug           | 3.10E-02 |
| GATA2                    | 0.069  | transcription regulator | 3.31E-02 |
| CSF2RB                   | 0.093  | transmembrane recepto   | 3.33E-02 |
| HTATIP2                  | 0.184  | transcription regulator | 3.33E-02 |
| CCK                      | -0.119 | other                   | 3.33E-02 |
| IL2RA                    | 0.053  | transmembrane recepto   | 3.33E-02 |
| CASP8                    | -0.612 | peptidase               | 3.33E-02 |
| TFCP2                    | -0.305 | transcription regulator | 3.33E-02 |
| PTPRE                    | -0.159 | phosphatase             | 3.33E-02 |
| DLX3                     |        | transcription regulator | 3.33E-02 |
| IL1RL1                   | -0.066 | transmembrane recepto   | 3.33E-02 |
| monorden                 |        | chemical - endogenous   | 3.33E-02 |
| pyruvic acid             |        | chemical - endogenous   | 3.33E-02 |
| D-tubocurarine           |        | chemical drug           | 3.33E-02 |
| acadesine                |        | chemical drug           | 3.33E-02 |
| peroxynitrite            |        | chemical toxicant       | 3.33E-02 |
| HSD17B4                  | -0.412 | enzyme                  | 3.37E-02 |
| AIRE                     | 0.001  | transcription regulator | 3.41E-02 |
| RNA polymerase II        |        | complex                 | 3.48E-02 |
| novobiocin               |        | chemical drug           | 3.53E-02 |
| Cobra Venom Factor       |        | chemical - endogenous   | 3.53E-02 |
| plumbagin                |        | chemical toxicant       | 3.53E-02 |
| MN1                      | -0.102 | other                   | 3.53E-02 |
| valine                   |        | chemical - endogenous   | 3.53E-02 |
| SPTAN1                   | -0.494 | other                   | 3.53E-02 |
| parathyroid hormone-re   |        | chemical drug           | 3.53E-02 |
| GMNN                     | -0.212 | transcription regulator | 3.53E-02 |
| PCSK9                    |        | peptidase               | 3.53E-02 |
| DAB2                     | -1.006 | other                   | 3.53E-02 |
| SSPN                     | -0.398 | other                   | 3.53E-02 |
| PAX1                     | -0.035 | transcription regulator | 3.53E-02 |
| PTPRR                    | 0.349  | phosphatase             | 3.53E-02 |
| CSNK2A2                  | -0.657 | kinase                  | 3.53E-02 |
| CD160                    | 0.047  | transmembrane recepto   | 3.53E-02 |
| MVP                      | -0.266 | other                   | 3.53E-02 |
| SDC1                     | 0.395  | enzyme                  | 3.53E-02 |
| MPL                      | 0.044  | transmembrane recepto   | 3.53E-02 |
| 6,7-dinitroquinoxaline-2 |        | chemical reagent        | 3.53E-02 |
| fluphenazine             |        | chemical drug           | 3.53E-02 |
| zonisamide               |        | chemical drug           | 3.53E-02 |
| acetic acid              |        | chemical - endogenous   | 3.53E-02 |
| 4-aminophenol            |        | chemical - endogenous   | 3.53E-02 |
| CA074-methyl ester       |        | chemical reagent        | 3.53E-02 |
| MDL 28170                |        | chemical toxicant       | 3.53E-02 |
| 2-amino-5-phosphonov:    |        | chemical - other        | 3.53E-02 |
| CCR1                     | 0.384  | G-protein coupled recep | 3.86E-02 |

|                          |        |                           |          |
|--------------------------|--------|---------------------------|----------|
| MAPK8IP1                 | -0.009 | other                     | 4.00E-02 |
| VCAN                     | -0.188 | other                     | 4.00E-02 |
| GIP                      | 0.008  | other                     | 4.00E-02 |
| NDRG1                    | -0.502 | kinase                    | 4.00E-02 |
| UBE2I                    | -0.232 | enzyme                    | 4.00E-02 |
| cyclopiazonic acid       |        | chemical - endogenous     | 4.00E-02 |
| metyrapone               |        | chemical drug             | 4.00E-02 |
| pyridoxine               |        | chemical - endogenous     | 4.00E-02 |
| N-ethyl-N-nitrosourea    |        | chemical toxicant         | 4.00E-02 |
| retinol                  |        | chemical drug             | 4.00E-02 |
| LEF1                     | 0.159  | transcription regulator   | 4.07E-02 |
| ADRA1A                   | 0.248  | G-protein coupled recep   | 4.43E-02 |
| mir-1                    |        | microRNA                  | 4.57E-02 |
| mannitol                 |        | chemical - endogenous     | 4.74E-02 |
| calpain                  |        | complex                   | 4.74E-02 |
| SIRT6                    | -0.033 | enzyme                    | 4.74E-02 |
| EPHB6                    | -0.891 | kinase                    | 4.74E-02 |
| ACVR1C                   |        | kinase                    | 4.74E-02 |
| RIPK1                    | -0.468 | kinase                    | 4.74E-02 |
| SMAD6                    | 0.256  | transcription regulator   | 4.74E-02 |
| SCGB1A1                  | 0.052  | cytokine                  | 4.74E-02 |
| K-252                    |        | chemical - kinase inhibit | 4.74E-02 |
| ammonium chloride        |        | chemical drug             | 4.74E-02 |
| GLP-1-(7-34)-amide       |        | chemical drug             | 4.74E-02 |
| vanadate                 |        | chemical - other          | 4.74E-02 |
| voltage-gated calcium c  |        | complex                   | 4.77E-02 |
| bacterial lipopolysaccha |        | chemical - other          | 4.77E-02 |
| SOX17                    | 0.181  | transcription regulator   | 4.77E-02 |
| SLC5A8                   |        | transporter               | 4.77E-02 |
| Collagen type III        |        | complex                   | 4.77E-02 |
| SNCB                     | -0.013 | other                     | 4.77E-02 |
| miR-199a-3p (and othei   |        | mature microRNA           | 4.77E-02 |
| NPY1R                    | -0.245 | G-protein coupled recep   | 4.77E-02 |
| XRCC5                    | -0.299 | enzyme                    | 4.77E-02 |
| CASQ2                    | 0.098  | other                     | 4.77E-02 |
| MLH1                     | -0.128 | enzyme                    | 4.77E-02 |
| GRM5                     | 0.056  | G-protein coupled recep   | 4.77E-02 |
| PPM1A                    | -0.303 | phosphatase               | 4.77E-02 |
| PAX9                     | 0.219  | transcription regulator   | 4.77E-02 |
| HNRNPD                   | -0.356 | transcription regulator   | 4.77E-02 |
| S1PR3                    |        | G-protein coupled recep   | 4.77E-02 |
| NPAS2                    | -1.068 | transcription regulator   | 4.77E-02 |
| ARHGDI                   | -0.132 | other                     | 4.77E-02 |
| diltiazem                |        | chemical drug             | 4.77E-02 |
| raclopride               |        | chemical drug             | 4.77E-02 |
| hydroquinone             |        | chemical - endogenous     | 4.77E-02 |
| manidipine               |        | chemical drug             | 4.77E-02 |
| N-Ac-leucyl-leucyl-meth  |        | chemical - protease inhi  | 4.77E-02 |
| zinostatin               |        | biologic drug             | 4.77E-02 |
| acolbifene               |        | chemical drug             | 4.77E-02 |
| norgestrel               |        | chemical drug             | 4.77E-02 |
| TAF4B                    | -0.062 | other                     | 4.93E-02 |
